# Supplementary material
Source: publisher figshare collection journal article supplement (https://frontiersin.figshare.com/ndownloader/files/16251878)
Supplement: Supplementary file 1 [file 16251878]

## Sheet: Supplementary Table 5a
Supplementary Table 6. Table describing for each bacterial and fungal OTU, the (1) taxonomic assignment, (2) the PERMANOVA test results (i.e. F-ratio, R2, p-value, q-value) for the management effect, (3) the standardized relative response to agricultural management (mean and standard deviation), (4) the sequence counts and relative abundance (rel_abd), and (5) the OTU counts in each sample. (1) T…
OTUs	1. Taxonomic assignment						2. Effect of agricultural management: statistics				3. Effect of agricultural management: Effect size				Abundance and relative abundance		Number of reads for each sample
	domain	phylum	class	order	family	genus	Fratio	R2	P-value	q-value	CONV_mean_all	AECO_mean_all	CONV_sd_all	AECO_sd_all	counts	rel_abd	001SandCONV1	002SandCONV1	003SandCONV1	004SandCONV2	005SandCONV2	006SandCONV2	007SandCONV3	008SandCONV3	009SandCONV3	010SandAECO1	011SandAECO1	012SandAECO1	013SandAECO2	014SandAECO2	015SandAECO2	016SandAECO3	017SandAECO3	018SandAECO3	019SiltCONV1	020SiltCONV1	021SiltCONV1	022SiltCONV2	023SiltCONV2	024SiltCONV2	025SiltCONV3	026SiltCONV3	027SiltCONV3	028SiltAECO1	029SiltAECO1	030SiltAECO1	031SiltAECO2	032SiltAECO2	033SiltAECO2
16S_OTU00007	Bacteria	Proteobacteria	Alphaproteobacteria	Dongiales	Dongiaceae	Dongia	39.5259	0.110014	0.0001	0.000507407	-0.148992	0.148992	1.08991	0.907694	2728	0.00222188	9	5	1	15	5	1	25	14	16	0	62	48	0	3	3	50	38	53	91	120	108	58	87	107	118	133	100	331	390	246	98	73	65
16S_OTU00011	Bacteria	Proteobacteria	Alphaproteobacteria	Sphingomonadales	Sphingomonadaceae	Sphingomonas	192.12	0.680885	0.0001	0.000507407	-0.0221599	0.0221599	0.988836	1.03922	14214	0.0115769	564	608	776	649	703	450	669	541	679	393	396	311	256	242	228	295	257	233	491	450	301	602	561	644	329	441	326	141	215	142	266	215	259
16S_OTU00018	Bacteria	Verrucomicrobia	Verrucomicrobiae	Chthoniobacterales	Chthoniobacteraceae	Candidatus_Udaeobacter	28.6955	0.245283	0.0001	0.000507407	-0.341205	0.341205	0.780641	1.09676	2273	0.0018513	110	78	40	139	60	121	28	62	75	82	89	76	204	124	166	240	154	144	2	0	7	10	2	11	29	14	10	93	47	54	1	0	1
16S_OTU00020	Bacteria	Proteobacteria	Alphaproteobacteria	Reyranellales	Reyranellaceae	Reyranella	44.5528	0.363834	0.0001	0.000507407	-0.0988413	0.0988413	1.05719	0.959422	3109	0.0025322	59	52	58	68	82	43	58	67	61	71	120	116	84	88	73	148	98	111	86	94	74	73	77	92	65	89	93	124	198	126	74	78	93
16S_OTU00024	Bacteria	Proteobacteria	Gammaproteobacteria	PLTA13	unclassified	unclassified	39.2723	0.203653	0.0001	0.000507407	-0.147804	0.147804	0.901319	1.09553	2820	0.00229681	34	19	15	42	47	38	59	62	46	13	54	40	22	17	34	93	68	124	69	56	63	22	41	44	151	176	144	88	85	101	227	145	149
16S_OTU00025	Bacteria	Actinobacteria	Actinobacteria	Micrococcales	Micrococcaceae	unclassified	52.2382	0.353329	0.0001	0.000507407	-0.327044	0.327044	0.271232	1.32618	3058	0.00249066	82	47	84	147	174	99	207	219	206	53	66	47	57	40	59	69	51	72	69	48	64	129	87	111	64	147	106	55	39	14	59	55	81
16S_OTU00029	Bacteria	Nitrospirae	Nitrospira	Nitrospirales	Nitrospiraceae	Nitrospira	61.2304	0.576331	0.0001	0.000507407	-0.296433	0.296433	0.823132	1.09325	5187	0.00422467	138	178	164	122	176	122	168	167	272	198	125	222	226	154	229	208	179	171	44	26	76	34	58	56	77	58	53	180	171	189	157	203	67
16S_OTU00030	Bacteria	Chloroflexi	Anaerolineae	Anaerolineales	Anaerolineaceae	unclassified	32.897	0.403787	0.0001	0.000507407	0.043819	-0.043819	1.2628	0.678295	2405	0.00195881	58	39	81	18	27	30	58	60	78	46	41	33	30	32	24	25	27	23	122	147	100	80	115	155	112	103	147	41	82	51	81	55	88
16S_OTU00034	Bacteria	Proteobacteria	Alphaproteobacteria	Rhizobiales	Rhizobiaceae	Mesorhizobium	40.4861	0.452104	0.0001	0.000507407	-0.0830065	0.0830065	0.760497	1.21073	2741	0.00223247	142	94	131	165	161	119	177	143	138	44	89	68	70	47	93	116	66	86	71	48	42	64	54	77	43	50	48	35	45	23	45	28	27
16S_OTU00058	Bacteria	Planctomycetes	Phycisphaerae	Tepidisphaerales	WD2101_soil_group	unclassified	40.0414	0.269261	0.0001	0.000507407	0.813617	-0.813617	0.730109	0.352052	2046	0.00166641	141	209	262	92	115	77	122	59	62	97	45	113	61	72	45	45	36	34	33	24	23	82	88	76	1	3	3	11	3	4	4	0	2
16S_OTU00059	Bacteria	Acidobacteria	Acidobacteriia	Acidobacteriales	unclassified	unclassified	22.6802	0.260633	0.0001	0.000507407	0.311565	-0.311565	1.07714	0.832483	877	0.000714293	47	40	33	49	46	36	44	32	60	64	47	62	58	48	48	53	40	51	0	0	2	0	0	0	2	6	5	0	4	0	0	0	0
16S_OTU00062	Bacteria	Acidobacteria	Subgroup_6	unclassified	unclassified	unclassified	29.0171	0.223554	0.0001	0.000507407	0.291379	-0.291379	1.22891	0.607294	4558	0.00371237	37	40	27	39	24	20	33	54	44	22	71	37	14	18	30	60	56	72	139	173	116	115	182	245	240	191	185	100	147	217	318	303	311
16S_OTU00068	Bacteria	Chloroflexi	Anaerolineae	SBR1031	unclassified	unclassified	24.2996	0.352198	0.0001	0.000507407	-0.246506	0.246506	1.02133	0.941824	1195	0.000973295	4	3	0	1	0	1	4	12	12	3	93	24	9	6	16	48	35	32	58	63	62	8	28	16	51	33	38	45	58	46	61	71	41
16S_OTU00069	Bacteria	Proteobacteria	Gammaproteobacteria	Betaproteobacteriales	Nitrosomonadaceae	Nitrosospira	183.445	0.82342	0.0001	0.000507407	-0.364479	0.364479	0.395002	1.27337	1957	0.00159392	74	70	91	93	98	82	134	91	91	30	36	29	12	18	22	22	17	19	102	74	84	87	58	77	77	82	52	31	19	24	26	27	18
16S_OTU00074	Bacteria	Acidobacteria	Subgroup_6	unclassified	unclassified	unclassified	18.4943	0.323786	0.0001	0.000507407	0.079269	-0.079269	0.910223	1.10318	2537	0.00206632	11	9	1	16	2	3	8	5	9	1	49	33	4	1	5	50	27	38	93	153	63	61	66	72	90	147	102	154	120	248	143	212	134
16S_OTU00077	Bacteria	Chloroflexi	Dehalococcoidia	S085	unclassified	unclassified	31.147	0.237116	0.0001	0.000507407	0.0391823	-0.0391823	0.769621	1.20965	841	0.000684972	3	3	0	35	10	14	10	20	22	2	19	14	5	5	4	12	20	14	73	52	42	50	60	110	19	32	36	12	19	14	22	14	19
16S_OTU00082	Bacteria	Acidobacteria	Blastocatellia_(Subgroup_4)	Pyrinomonadales	Pyrinomonadaceae	RB41	28.0605	0.264437	0.0001	0.000507407	-0.488333	0.488333	0.637662	1.07108	6008	0.00489335	179	191	142	162	109	121	246	234	262	104	152	174	46	96	44	65	115	63	230	271	198	242	268	281	197	183	148	176	264	150	184	129	140
16S_OTU00083	Bacteria	Chloroflexi	Anaerolineae	Anaerolineales	Anaerolineaceae	unclassified	29.1069	0.312569	0.0001	0.000507407	-0.110313	0.110313	1.10179	0.905052	4411	0.00359264	47	48	23	28	23	25	62	67	66	20	128	57	18	24	24	28	40	33	314	391	185	218	262	451	296	239	241	71	152	77	133	121	159
16S_OTU00093	Bacteria	Acidobacteria	Blastocatellia_(Subgroup_4)	Blastocatellales	Blastocatellaceae	unclassified	212.753	0.525773	0.0001	0.000507407	-0.59475	0.59475	0.337523	1.09354	697	0.000567688	83	67	85	55	61	37	87	59	72	7	5	19	3	2	1	1	12	0	5	2	0	12	12	4	2	1	2	0	1	0	0	0	0
16S_OTU00103	Bacteria	Proteobacteria	Alphaproteobacteria	Sphingomonadales	Sphingomonadaceae	Altererythrobacter	22.2419	0.267016	0.0001	0.000507407	-0.364932	0.364932	0.904832	0.978817	2805	0.0022846	39	40	69	102	78	81	109	69	85	30	37	34	29	31	29	56	20	73	162	104	153	61	70	81	149	209	167	52	173	44	70	45	68
16S_OTU00104	Bacteria	Proteobacteria	Alphaproteobacteria	Reyranellales	Reyranellaceae	unclassified	33.2088	0.23693	0.0001	0.000507407	-0.232552	0.232552	1.19454	0.719283	656	0.000534294	36	28	28	70	54	48	43	57	82	10	16	29	39	19	40	11	9	7	1	0	11	0	0	0	7	2	4	3	0	2	0	0	0
16S_OTU00105	Bacteria	Acidobacteria	Subgroup_6	unclassified	unclassified	unclassified	31.2817	0.438715	0.0001	0.000507407	0.0500231	-0.0500231	1.15188	0.852468	779	0.000634474	2	7	1	7	0	10	1	2	1	1	35	14	4	3	6	26	20	51	26	32	36	10	11	17	19	13	24	27	67	32	46	48	55
16S_OTU00107	Bacteria	Proteobacteria	Gammaproteobacteria	Betaproteobacteriales	Nitrosomonadaceae	MND1	39.9223	0.313428	0.0001	0.000507407	-0.444967	0.444967	0.913899	0.896842	1370	0.00111583	2	7	5	15	7	9	9	15	17	4	36	27	7	18	17	48	71	45	52	56	32	13	18	22	38	85	61	19	35	57	101	69	87
16S_OTU00111	Bacteria	Proteobacteria	Deltaproteobacteria	Desulfuromonadales	Desulfuromonadaceae	Desulfuromonas	24.7572	0.144076	0.0001	0.000507407	0.586101	-0.586101	1.09028	0.377722	1275	0.00103845	1	4	0	0	0	0	3	0	0	0	17	5	1	1	1	0	0	0	63	170	62	188	172	389	21	7	19	20	49	12	17	2	27
16S_OTU00118	Bacteria	Chloroflexi	Anaerolineae	Anaerolineales	Anaerolineaceae	unclassified	30.9428	0.298401	0.0001	0.000507407	0.149388	-0.149388	0.94116	1.06103	549	0.000447146	0	0	0	0	0	0	0	0	0	0	0	0	0	0	0	0	4	0	20	7	2	0	10	8	2	14	5	34	15	57	71	51	22
16S_OTU00128	Bacteria	Acidobacteria	Subgroup_6	unclassified	unclassified	unclassified	32.5367	0.161335	0.0001	0.000507407	-0.316899	0.316899	1.00193	0.917765	1141	0.000929314	1	0	0	0	0	0	1	0	0	0	7	1	0	0	0	0	0	1	73	73	34	29	87	65	3	3	4	14	26	53	129	120	112
16S_OTU00135	Bacteria	Verrucomicrobia	Verrucomicrobiae	Opitutales	Opitutaceae	Opitutus	37.2242	0.305222	0.0001	0.000507407	0.0741646	-0.0741646	0.803946	1.18357	3005	0.00244749	53	61	45	69	42	43	81	62	67	34	43	48	32	36	27	66	41	46	166	240	88	205	179	286	99	131	129	73	86	57	74	50	79
16S_OTU00137	Bacteria	Planctomycetes	Planctomycetacia	Gemmatales	Gemmataceae	unclassified	48.0954	0.361244	0.0001	0.000507407	-0.748547	0.748547	0.528692	0.769898	1786	0.00145465	26	37	19	56	50	43	39	41	43	34	25	40	63	45	74	75	86	102	32	42	61	18	30	43	59	38	56	54	62	49	63	60	59
16S_OTU00140	Bacteria	Acidobacteria	Subgroup_11	unclassified	unclassified	unclassified	35.741	0.421823	0.0001	0.000507407	0.626554	-0.626554	0.906527	0.636951	972	0.000791668	8	11	1	13	8	9	11	16	23	8	27	18	6	8	12	23	28	19	30	40	33	15	35	28	47	33	29	38	44	38	70	48	48
16S_OTU00141	Bacteria	Chloroflexi	Anaerolineae	Anaerolineales	Anaerolineaceae	Anaerolinea	66.0044	0.205214	0.0001	0.000507407	0.279897	-0.279897	1.11125	0.811207	478	0.000389318	24	52	17	6	3	5	13	7	9	1	0	2	12	2	3	0	4	1	4	21	5	74	87	72	6	15	7	6	8	7	1	2	1
16S_OTU00142	Bacteria	Proteobacteria	Alphaproteobacteria	Rhizobiales	Rhizobiales_Incertae_Sedis	Bauldia	54.4724	0.396954	0.0001	0.000507407	0.208064	-0.208064	0.918693	1.05979	953	0.000776193	68	45	54	61	75	49	84	69	71	18	26	28	37	31	35	30	18	23	8	8	13	7	5	4	20	9	9	11	2	10	3	10	4
16S_OTU00143	Bacteria	Planctomycetes	Phycisphaerae	Tepidisphaerales	WD2101_soil_group	unclassified	77.2669	0.341907	0.0001	0.000507407	-0.275052	0.275052	0.699942	1.18689	503	0.00040968	3	0	0	2	1	0	4	1	0	0	14	8	0	0	0	3	4	0	66	35	56	28	23	38	42	49	60	4	2	8	9	5	9
16S_OTU00147	Bacteria	Actinobacteria	Actinobacteria	Micrococcales	Intrasporangiaceae	unclassified	33.563	0.502604	0.0001	0.000507407	0.662982	-0.662982	0.806688	0.690851	2241	0.00182523	88	74	100	107	89	73	134	136	61	44	40	30	34	22	38	41	22	33	85	53	47	103	73	85	48	127	78	27	62	20	37	44	78
16S_OTU00150	Bacteria	Proteobacteria	Alphaproteobacteria	Rhizobiales	Rhizobiaceae	Allorhizobium-Neorhizobium-Pararhizobium-Rhizobium	35.4214	0.430693	0.0001	0.000507407	-0.303512	0.303512	0.520606	1.26203	1185	0.00096515	40	22	29	39	30	21	29	33	45	55	86	58	42	38	54	62	41	69	41	15	19	23	14	27	5	8	10	37	45	17	26	17	28
16S_OTU00155	Bacteria	Proteobacteria	Gammaproteobacteria	Betaproteobacteriales	SC-I-84	unclassified	89.4987	0.644995	0.0001	0.000507407	-0.291561	0.291561	0.786316	1.12273	929	0.000756645	66	112	71	67	55	44	95	62	57	21	21	15	11	11	16	11	10	16	23	10	16	32	18	13	17	9	17	0	0	5	1	3	0
16S_OTU00156	Bacteria	Chloroflexi	Gitt-GS-136	unclassified	unclassified	unclassified	36.7561	0.234273	0.0001	0.000507407	0.129929	-0.129929	0.6492	1.26555	872	0.00071022	1	2	0	3	0	3	0	0	0	1	3	2	3	0	1	0	2	0	38	38	4	13	21	37	7	11	14	18	20	33	107	74	113
16S_OTU00166	Bacteria	Proteobacteria	Gammaproteobacteria	Xanthomonadales	Xanthomonadaceae	Lysobacter	58.1562	0.304273	0.0001	0.000507407	-0.0599362	0.0599362	0.919362	1.09818	1548	0.0012608	58	46	76	88	58	52	64	66	57	28	46	23	8	12	9	23	10	20	88	91	46	224	148	144	13	9	2	9	14	4	1	4	3
16S_OTU00168	Bacteria	Acidobacteria	Blastocatellia_(Subgroup_4)	Blastocatellales	Blastocatellaceae	unclassified	27.0455	0.236612	0.0001	0.000507407	-0.229499	0.229499	0.980377	0.99305	982	0.000799812	106	154	124	55	87	53	79	30	64	53	26	28	19	51	18	13	12	9	0	0	0	0	0	0	0	1	0	0	0	0	0	0	0
16S_OTU00169	Bacteria	Cyanobacteria	Oxyphotobacteria	Chloroplast	unclassified	unclassified	137.286	0.651569	0.0001	0.000507407	0.49786	-0.49786	0.855963	0.895132	1006	0.00081936	37	27	38	89	58	47	63	44	51	12	16	19	11	17	14	6	6	8	45	66	46	31	40	57	11	37	23	12	21	9	8	11	6
16S_OTU00172	Bacteria	Verrucomicrobia	Verrucomicrobiae	Chthoniobacterales	Chthoniobacteraceae	Candidatus_Udaeobacter	45.9115	0.214185	0.0001	0.000507407	0.079078	-0.079078	0.881006	1.12668	1194	0.000972481	26	25	14	47	53	52	40	40	59	15	46	52	64	39	63	77	63	93	9	12	16	9	3	4	5	1	2	92	69	70	5	4	7
16S_OTU00179	Bacteria	Chloroflexi	Anaerolineae	Anaerolineales	Anaerolineaceae	unclassified	22.1441	0.225511	0.0001	0.000507407	0.0559207	-0.0559207	0.849224	1.1537	848	0.000690673	70	89	119	48	88	50	40	53	51	53	16	33	29	43	32	10	9	13	0	0	1	0	0	0	1	0	0	0	0	0	0	0	0
16S_OTU00183	Bacteria	Proteobacteria	Gammaproteobacteria	Betaproteobacteriales	Nitrosomonadaceae	MND1	54.2138	0.24469	0.0001	0.000507407	-0.230737	0.230737	0.936757	1.03372	696	0.000566873	4	5	4	1	2	2	5	5	2	1	1	0	0	0	0	2	1	1	11	45	4	5	11	16	1	2	0	10	22	31	114	50	71
16S_OTU00186	Bacteria	Proteobacteria	Gammaproteobacteria	Betaproteobacteriales	Nitrosomonadaceae	IS-44	32.3924	0.13478	0.0001	0.000507407	-0.175804	0.175804	0.961115	1.03423	1174	0.000956191	10	12	10	52	36	32	78	66	88	12	45	62	51	63	52	157	104	112	3	5	7	2	2	2	12	14	14	19	8	16	6	5	4
16S_OTU00187	Bacteria	Acidobacteria	Subgroup_6	unclassified	unclassified	unclassified	26.3677	0.248246	0.0001	0.000507407	0.256662	-0.256662	1.02509	0.931939	1723	0.00140334	108	106	127	59	67	48	58	82	72	118	61	105	113	114	142	88	102	81	0	2	4	11	1	0	5	1	1	22	12	10	2	0	0
16S_OTU00198	Bacteria	Proteobacteria	Gammaproteobacteria	Betaproteobacteriales	Nitrosomonadaceae	MND1	23.2497	0.316965	0.0001	0.000507407	0.186663	-0.186663	0.749861	1.19279	1107	0.000901621	25	29	22	31	20	35	24	43	48	29	24	26	33	36	47	44	49	42	26	20	41	11	9	19	26	25	36	32	31	29	42	34	26
16S_OTU00202	Bacteria	Patescibacteria	Saccharimonadia	Saccharimonadales	unclassified	unclassified	61.7616	0.406523	0.0001	0.000507407	-0.0028623	0.0028623	1.04346	0.984886	328	0.000267147	33	24	57	34	32	34	30	29	13	9	13	4	0	2	0	2	1	0	9	0	1	0	1	0	0	0	0	0	0	0	0	0	0
16S_OTU00209	Bacteria	Planctomycetes	Planctomycetacia	Planctomycetales	Rubinisphaeraceae	SH-PL14	52.764	0.326175	0.0001	0.000507407	0.247509	-0.247509	1.17886	0.734424	320	0.000260631	0	0	0	9	2	4	10	3	5	0	3	2	2	2	0	6	6	4	26	17	29	24	28	28	20	17	11	10	5	3	12	9	10
16S_OTU00210	Bacteria	Proteobacteria	Gammaproteobacteria	Betaproteobacteriales	SC-I-84	unclassified	63.5583	0.189886	0.0001	0.000507407	0.290086	-0.290086	0.914158	1.02222	1092	0.000889404	20	22	24	17	10	26	21	15	4	31	29	48	18	18	31	24	24	29	56	59	55	47	54	57	72	66	74	11	12	15	15	22	16
16S_OTU00212	Bacteria	Proteobacteria	Gammaproteobacteria	Xanthomonadales	Xanthomonadaceae	Arenimonas	64.0146	0.194025	0.0001	0.000507407	-0.497606	0.497606	0.749805	0.986033	609	0.000496014	1	0	0	2	0	0	1	1	3	2	3	0	3	0	0	7	12	5	47	41	33	83	73	87	26	37	21	4	36	14	15	8	14
16S_OTU00217	Bacteria	Acidobacteria	Subgroup_6	unclassified	unclassified	unclassified	37.1905	0.089705	0.0001	0.000507407	-0.261082	0.261082	0.558549	1.2659	899	0.000732211	0	0	0	2	0	1	1	3	7	0	2	3	0	0	2	5	2	4	17	26	39	11	13	9	82	92	74	40	57	44	57	68	51
16S_OTU00218	Bacteria	Acidobacteria	Subgroup_6	unclassified	unclassified	unclassified	25.1835	0.207078	0.0001	0.000507407	-0.202788	0.202788	1.05718	0.924182	4376	0.00356413	8	5	2	22	6	9	15	22	30	8	65	18	2	3	7	17	32	21	200	282	241	97	188	185	179	145	157	121	148	213	362	399	265
16S_OTU00219	Bacteria	Firmicutes	Clostridia	Clostridiales	Peptostreptococcaceae	Romboutsia	51.5525	0.391147	0.0001	0.000507407	-0.32623	0.32623	0.780363	1.10656	475	0.000386875	22	24	32	31	41	26	28	33	29	4	3	4	7	2	7	5	1	1	21	9	13	4	1	5	10	30	14	19	5	14	3	5	5
16S_OTU00224	Bacteria	Acidobacteria	Blastocatellia_(Subgroup_4)	45597	unclassified	unclassified	67.428	0.39577	0.0001	0.000507407	-0.519485	0.519485	0.510818	1.10743	644	0.000524521	0	1	0	0	0	1	17	3	5	1	10	4	0	1	2	0	0	3	39	64	42	45	48	51	51	60	59	28	24	10	14	10	11
16S_OTU00242	Bacteria	Actinobacteria	Acidimicrobiia	IMCC26256	unclassified	unclassified	51.2752	0.227332	0.0001	0.000507407	0.045579	-0.045579	1.08691	0.934375	618	0.000503344	9	8	9	21	27	18	40	41	60	23	22	19	19	21	24	43	39	31	2	0	0	0	1	2	1	7	0	9	3	7	15	21	20
16S_OTU00245	Bacteria	Proteobacteria	Alphaproteobacteria	Rhizobiales	A0839	unclassified	75.6636	0.627514	0.0001	0.000507407	-0.222674	0.222674	0.669944	1.22678	1038	0.000845423	34	19	10	36	31	25	39	35	46	21	49	46	40	38	48	74	44	69	5	1	7	3	2	3	8	5	7	26	24	45	34	42	16
16S_OTU00246	Bacteria	Gemmatimonadetes	Gemmatimonadetes	Gemmatimonadales	Gemmatimonadaceae	unclassified	19.5211	0.243697	0.0001	0.000507407	-0.279478	0.279478	0.702092	1.18342	990	0.000806328	24	14	20	25	28	27	17	22	12	32	47	58	23	20	31	55	22	44	27	41	31	14	31	16	21	23	21	40	39	32	25	28	34
16S_OTU00248	Bacteria	Acidobacteria	Subgroup_6	unclassified	unclassified	unclassified	44.091	0.265909	0.0001	0.000507407	0.511646	-0.511646	1.1228	0.493745	1324	0.00107836	15	9	3	64	19	29	52	47	42	1	42	16	9	15	6	27	41	25	69	101	46	94	101	139	54	38	27	22	30	19	23	25	23
16S_OTU00254	Bacteria	Verrucomicrobia	Verrucomicrobiae	Chthoniobacterales	Chthoniobacteraceae	Chthoniobacter	48.5645	0.352473	0.0001	0.000507407	-0.503382	0.503382	0.903915	0.839741	586	0.000477281	11	6	7	12	2	10	9	7	6	4	9	4	1	4	3	3	2	7	52	46	24	65	43	69	21	34	36	4	25	4	19	5	6
16S_OTU00258	Bacteria	Acidobacteria	Thermoanaerobaculia	Thermoanaerobaculales	Thermoanaerobaculaceae	unclassified	220.709	0.201551	0.0001	0.000507407	-0.432342	0.432342	0.643687	1.11744	393	0.000320088	0	0	0	0	0	0	0	0	0	0	0	1	0	0	0	1	0	0	7	13	9	5	10	8	14	12	13	6	1	7	45	51	38
16S_OTU00262	Bacteria	Bacteroidetes	Bacteroidia	Chitinophagales	Chitinophagaceae	unclassified	55.745	0.309506	0.0001	0.000507407	0.152406	-0.152406	0.959029	1.04398	503	0.00040968	86	78	102	45	78	20	47	11	19	11	0	0	1	0	0	0	0	0	1	0	0	2	0	0	1	0	0	1	0	0	0	0	0
16S_OTU00265	Bacteria	Verrucomicrobia	Verrucomicrobiae	Opitutales	Opitutaceae	Lacunisphaera	63.7666	0.503291	0.0001	0.000507407	-0.466202	0.466202	0.632822	1.09458	386	0.000314387	34	40	20	14	24	28	32	27	23	2	0	0	2	0	5	0	0	0	6	13	11	5	12	13	7	11	6	4	10	10	7	6	1
16S_OTU00268	Bacteria	Planctomycetes	Planctomycetacia	unclassified	unclassified	unclassified	30.1232	0.214706	0.0001	0.000507407	0.358041	-0.358041	0.893776	0.994244	343	0.000279364	0	0	0	0	0	0	0	0	0	0	0	0	0	0	0	0	0	0	0	1	0	0	0	0	0	0	0	2	1	1	102	36	45
16S_OTU00269	Bacteria	Proteobacteria	Gammaproteobacteria	Betaproteobacteriales	TRA3-20	unclassified	44.5181	0.253853	0.0001	0.000507407	-0.0706992	0.0706992	0.526811	1.33068	2276	0.00185374	44	58	40	61	53	44	54	64	82	19	51	46	34	32	33	89	80	66	51	58	39	22	31	28	75	77	76	49	68	89	91	106	109
16S_OTU00274	Bacteria	Acidobacteria	Blastocatellia_(Subgroup_4)	Pyrinomonadales	Pyrinomonadaceae	RB41	25.4344	0.354107	0.0001	0.000507407	-0.201744	0.201744	0.49534	1.31426	2210	0.00179999	83	101	122	93	108	89	73	73	104	91	44	86	84	95	153	74	108	115	19	15	20	9	12	13	6	19	13	50	64	53	48	31	31
16S_OTU00279	Bacteria	Chloroflexi	Chloroflexia	Chloroflexales	Roseiflexaceae	unclassified	44.5106	0.353369	0.0001	0.000507407	-0.0356782	0.0356782	1.15758	0.846253	2621	0.00213473	87	80	114	88	99	64	148	180	143	26	53	61	60	59	67	84	50	72	91	66	42	114	112	90	70	52	66	40	47	38	58	40	55
16S_OTU00295	Bacteria	Chloroflexi	Chloroflexia	Thermomicrobiales	JG30-KF-CM45	unclassified	35.4867	0.397656	0.0001	0.000507407	0.349607	-0.349607	0.829729	1.0543	488	0.000397463	13	17	26	20	2	7	22	11	21	5	14	6	7	5	2	7	5	4	29	35	16	36	19	47	11	12	24	1	5	2	10	8	10
16S_OTU00308	Bacteria	Nitrospirae	Nitrospira	Nitrospirales	Nitrospiraceae	Nitrospira	38.0429	0.332347	0.0001	0.000507407	-0.585162	0.585162	0.582946	0.996937	490	0.000399092	30	28	35	12	21	21	14	13	19	21	8	15	18	18	17	17	13	11	29	25	17	7	7	13	19	8	17	4	2	1	2	3	1
16S_OTU00309	Bacteria	Verrucomicrobia	Verrucomicrobiae	Chthoniobacterales	Xiphinematobacteraceae	Candidatus_Xiphinematobacter	44.7023	0.426923	0.0001	0.000507407	0.894733	-0.894733	0.539405	0.269425	1164	0.000948046	16	3	2	4	0	7	5	4	0	3	47	28	3	9	0	14	8	5	30	48	43	25	42	57	33	28	23	53	41	77	82	93	98
16S_OTU00312	Bacteria	Acidobacteria	Blastocatellia_(Subgroup_4)	Pyrinomonadales	Pyrinomonadaceae	RB41	48.8985	0.188595	0.0001	0.000507407	-0.0885292	0.0885292	1.03067	0.989926	670	0.000545697	12	14	9	17	16	16	97	78	152	4	6	9	2	3	0	6	7	4	21	12	10	6	10	20	30	18	18	15	23	4	4	3	8
16S_OTU00317	Bacteria	Verrucomicrobia	Verrucomicrobiae	Verrucomicrobiales	Verrucomicrobiaceae	Roseimicrobium	107.655	0.631226	0.0001	0.000507407	-0.183014	0.183014	0.845231	1.12849	791	0.000644248	35	41	58	31	34	20	70	45	45	19	19	23	15	15	10	19	5	13	27	22	27	27	29	37	12	24	16	12	18	4	2	4	5
16S_OTU00320	Bacteria	Acidobacteria	Blastocatellia_(Subgroup_4)	Pyrinomonadales	Pyrinomonadaceae	RB41	31.1463	0.303758	0.0001	0.000507407	0.0884922	-0.0884922	1.05251	0.966674	453	0.000368956	2	0	0	0	2	1	0	5	2	0	2	1	1	0	7	3	6	1	6	4	7	4	9	7	0	0	0	13	8	37	66	83	22
16S_OTU00331	Bacteria	Proteobacteria	Alphaproteobacteria	Rhizobiales	Xanthobacteraceae	Rhodopseudomonas	36.2584	0.371863	0.0001	0.000507407	0.135648	-0.135648	1.19844	0.763934	460	0.000374658	21	22	11	42	22	16	45	21	26	12	12	11	3	4	6	9	3	11	12	17	4	36	29	20	1	9	5	1	3	1	4	2	6
16S_OTU00332	Bacteria	Proteobacteria	Alphaproteobacteria	Reyranellales	Reyranellaceae	unclassified	29.6918	0.366174	0.0001	0.000507407	-0.561063	0.561063	0.639253	0.991747	277	0.000225609	19	21	48	24	21	10	22	15	26	2	4	8	5	8	12	6	7	4	1	1	1	5	3	2	0	0	0	1	1	0	0	0	0
16S_OTU00335	Bacteria	Patescibacteria	Saccharimonadia	Saccharimonadales	unclassified	unclassified	176.776	0.175108	0.0001	0.000507407	-0.453149	0.453149	0.536373	1.15598	472	0.000384431	9	6	7	1	4	1	2	1	1	0	0	5	0	0	1	1	2	2	24	10	15	14	17	18	103	95	86	0	4	2	7	3	10
16S_OTU00336	Bacteria	Actinobacteria	Acidimicrobiia	unclassified	unclassified	unclassified	36.5612	0.483121	0.0001	0.000507407	0.381076	-0.381076	0.803052	1.05186	363	0.000295654	29	18	25	15	16	7	9	14	16	1	5	7	7	9	7	5	2	5	17	9	22	11	11	7	17	13	9	8	3	6	3	3	7
16S_OTU00338	Bacteria	Planctomycetes	Phycisphaerae	Tepidisphaerales	WD2101_soil_group	unclassified	26.892	0.165177	0.0001	0.000507407	0.480135	-0.480135	1.10426	0.592662	1585	0.00129094	127	121	120	89	82	67	60	50	64	56	61	78	44	42	47	72	42	48	18	25	35	13	20	15	20	23	21	26	24	22	6	16	10
16S_OTU00341	Bacteria	Armatimonadetes	Fimbriimonadia	Fimbriimonadales	Fimbriimonadaceae	unclassified	35.8251	0.420258	0.0001	0.000507407	-0.216093	0.216093	1.16525	0.775971	283	0.000230496	1	0	0	4	4	9	2	2	7	0	3	0	0	0	1	0	0	0	29	19	18	13	16	16	22	19	21	4	12	10	11	6	4
16S_OTU00349	Bacteria	Planctomycetes	Phycisphaerae	Tepidisphaerales	WD2101_soil_group	unclassified	27.764	0.302687	0.0001	0.000507407	-0.192295	0.192295	0.962719	1.02649	489	0.000398277	44	46	72	34	54	21	39	14	17	19	12	13	7	5	15	15	8	6	3	5	0	17	6	5	0	0	0	3	3	6	0	0	0
16S_OTU00350	Bacteria	Proteobacteria	Alphaproteobacteria	Rhizobiales	Methyloligellaceae	unclassified	103.157	0.338212	0.0001	0.000507407	0.339926	-0.339926	0.981882	0.921975	298	0.000242713	0	2	2	0	0	0	6	5	1	4	6	0	10	2	10	6	3	1	7	12	3	8	10	6	0	0	0	3	9	12	24	24	29
16S_OTU00351	Bacteria	Acidobacteria	Acidobacteriia	Solibacterales	Solibacteraceae_(Subgroup_3)	Bryobacter	24.3217	0.17758	0.0001	0.000507407	0.323614	-0.323614	0.531112	1.24698	1605	0.00130723	25	26	24	53	25	27	69	41	35	19	33	23	20	25	16	45	24	36	85	69	44	117	92	134	38	49	64	18	43	19	49	47	43
16S_OTU00352	Bacteria	Latescibacteria	unclassified	unclassified	unclassified	unclassified	23.1561	0.185588	0.0001	0.000507407	0.507042	-0.507042	0.932076	0.80351	529	0.000430856	9	9	12	3	3	13	20	16	30	5	12	12	0	3	2	0	0	0	29	41	19	32	45	44	7	9	13	16	31	12	21	12	14
16S_OTU00364	Bacteria	Bacteroidetes	Bacteroidia	Chitinophagales	Chitinophagaceae	unclassified	52.6663	0.500279	0.0001	0.000507407	0.551259	-0.551259	0.930799	0.740886	580	0.000472394	30	33	38	28	42	17	41	32	41	10	19	24	16	4	11	15	12	18	11	15	7	23	18	24	3	13	3	5	3	0	2	5	8
16S_OTU00376	Bacteria	Chloroflexi	Anaerolineae	SBR1031	unclassified	unclassified	24.3582	0.326102	0.0001	0.000507407	-0.335186	0.335186	0.902426	1.00326	302	0.000245971	21	25	34	14	20	16	30	14	14	16	8	12	6	7	6	4	3	3	5	6	8	7	7	1	0	0	2	10	1	0	1	0	0
16S_OTU00378	Bacteria	Acidobacteria	Blastocatellia_(Subgroup_4)	Blastocatellales	Blastocatellaceae	JGI_0001001-H03	26.7315	0.160391	0.0001	0.000507407	0.241669	-0.241669	1.12754	0.814739	702	0.00057176	64	18	18	87	95	73	40	48	62	4	4	6	48	28	34	18	23	26	1	1	0	1	1	1	0	0	0	1	0	0	0	0	0
16S_OTU00380	Bacteria	Actinobacteria	Actinobacteria	Streptosporangiales	Thermomonosporaceae	Actinocorallia	26.7418	0.131886	0.0001	0.000507407	-0.34641	0.34641	1.00912	0.886778	403	0.000328233	12	3	5	10	11	14	10	11	13	7	3	13	5	9	7	3	2	8	4	6	4	9	11	8	56	81	39	3	7	6	2	5	5
16S_OTU00385	Bacteria	Planctomycetes	OM190	unclassified	unclassified	unclassified	77.1782	0.413047	0.0001	0.000507407	0.444656	-0.444656	1.08514	0.680142	561	0.000456919	2	5	8	2	3	5	14	3	3	1	20	12	6	2	7	22	10	9	9	9	6	6	2	7	29	25	25	23	33	17	42	44	44
16S_OTU00389	Bacteria	Proteobacteria	Gammaproteobacteria	Steroidobacterales	unclassified	unclassified	17.5122	0.0654504	0.0001	0.000507407	0.138696	-0.138696	1.20555	0.751492	194	0.000158008	0	0	0	0	0	0	0	0	0	0	0	0	0	0	0	0	0	0	11	11	6	0	8	7	28	35	25	0	1	0	14	7	16
16S_OTU00390	Bacteria	Acidobacteria	Subgroup_6	unclassified	unclassified	unclassified	32.2782	0.301201	0.0001	0.000507407	0.295261	-0.295261	0.895955	1.03512	545	0.000443888	5	3	4	6	1	4	7	3	2	5	18	13	1	3	2	2	6	6	16	29	24	17	21	32	17	14	18	28	46	36	29	28	30
16S_OTU00391	Bacteria	Chloroflexi	Anaerolineae	RBG-13-54-9	unclassified	unclassified	34.0913	0.379719	0.0001	0.000507407	0.336687	-0.336687	0.817983	1.07223	304	0.0002476	37	27	21	21	35	23	31	15	34	2	4	11	5	10	4	2	10	6	0	1	3	0	0	1	0	0	0	0	0	1	0	0	0
16S_OTU00402	Bacteria	Latescibacteria	unclassified	unclassified	unclassified	unclassified	33.4737	0.21269	0.0001	0.000507407	-0.242009	0.242009	0.921812	1.04166	646	0.000526149	3	10	0	20	7	10	6	23	18	10	18	14	6	5	5	2	5	0	16	9	21	5	12	13	17	12	21	6	15	34	42	54	51
16S_OTU00405	Bacteria	Chloroflexi	KD4-96	unclassified	unclassified	unclassified	101.81	0.553588	0.0001	0.000507407	0.493581	-0.493581	0.934914	0.817834	1399	0.00113945	91	94	76	82	52	43	117	88	90	30	34	20	24	17	27	25	37	34	23	27	43	15	16	22	55	51	45	22	20	15	10	15	6
16S_OTU00410	Bacteria	Verrucomicrobia	Verrucomicrobiae	Pedosphaerales	Pedosphaeraceae	unclassified	28.2892	0.253199	0.0001	0.000507407	0.71496	-0.71496	0.745243	0.648817	280	0.000228052	9	28	19	43	25	27	19	12	17	1	7	6	8	10	4	12	5	12	3	1	1	3	2	3	0	0	0	3	0	0	0	0	0
16S_OTU00416	Bacteria	Bacteroidetes	Bacteroidia	Chitinophagales	Chitinophagaceae	unclassified	35.9778	0.475266	0.0001	0.000507407	0.362719	-0.362719	1.06117	0.808785	707	0.000575832	44	46	79	43	46	43	41	48	56	37	18	33	30	9	25	21	17	12	9	2	8	9	3	4	14	3	4	1	1	0	0	0	0
16S_OTU00420	Bacteria	Proteobacteria	Gammaproteobacteria	Xanthomonadales	Rhodanobacteraceae	Rhodanobacter	51.9913	0.341422	0.0001	0.000507407	-0.12572	0.12572	0.661425	1.26011	348	0.000283437	32	45	26	31	38	32	37	22	22	17	8	23	2	2	2	7	1	0	0	0	0	1	0	0	0	0	0	0	0	0	0	0	0
16S_OTU00424	Bacteria	Bacteroidetes	Bacteroidia	Chitinophagales	Chitinophagaceae	Flavisolibacter	36.1628	0.380994	0.0001	0.000507407	0.379676	-0.379676	0.746281	1.0939	479	0.000390132	3	4	1	3	2	3	5	12	6	0	0	0	0	0	1	0	0	1	58	26	24	57	34	54	23	43	32	4	32	6	8	10	8
16S_OTU00426	Bacteria	Planctomycetes	OM190	unclassified	unclassified	unclassified	35.838	0.293043	0.0001	0.000507407	-0.117781	0.117781	0.444906	1.35333	251	0.000204433	26	24	41	18	21	15	23	9	12	8	7	7	3	7	3	11	4	2	1	0	2	1	0	0	1	0	0	1	2	2	0	0	0
16S_OTU00427	Bacteria	Firmicutes	Bacilli	Bacillales	Bacillaceae	Bacillus	23.537	0.311162	0.0001	0.000507407	-0.446359	0.446359	0.620947	1.11863	628	0.000511489	64	39	59	48	29	34	28	50	20	12	10	7	29	10	33	9	6	5	5	5	18	13	9	6	13	7	8	9	5	3	6	8	6
16S_OTU00428	Bacteria	Verrucomicrobia	Verrucomicrobiae	Pedosphaerales	Pedosphaeraceae	unclassified	32.262	0.469725	0.0001	0.000507407	0.299261	-0.299261	1.23751	0.581152	1448	0.00117936	26	24	42	49	41	33	33	24	34	14	25	7	15	14	29	14	13	20	68	90	44	68	52	105	66	75	63	32	52	29	53	39	46
16S_OTU00431	Bacteria	Proteobacteria	Gammaproteobacteria	Betaproteobacteriales	Burkholderiaceae	Massilia	81.4003	0.55269	0.0001	0.000507407	0.578463	-0.578463	0.957484	0.658364	2004	0.0016322	65	97	119	121	121	71	83	82	57	38	46	62	15	28	39	29	22	22	80	52	60	111	89	92	47	67	38	19	59	35	24	42	21
16S_OTU00439	Bacteria	Planctomycetes	Phycisphaerae	Tepidisphaerales	WD2101_soil_group	unclassified	61.6308	0.340138	0.0001	0.000507407	-0.286667	0.286667	0.860326	1.06988	485	0.000395019	28	20	36	31	33	24	25	15	22	6	15	9	9	11	7	14	19	28	14	16	13	21	27	22	1	1	1	7	6	2	0	0	2
16S_OTU00441	Bacteria	Actinobacteria	Acidimicrobiia	unclassified	unclassified	unclassified	44.375	0.473488	0.0001	0.000507407	0.509508	-0.509508	0.974598	0.747827	486	0.000395834	39	38	27	40	29	23	31	19	32	8	11	13	6	7	11	12	17	7	13	2	13	13	9	10	6	7	3	5	2	1	6	3	6
16S_OTU00443	Bacteria	Planctomycetes	Phycisphaerae	Tepidisphaerales	WD2101_soil_group	unclassified	53.645	0.282454	0.0001	0.000507407	0.479947	-0.479947	0.968283	0.795898	581	0.000473209	15	14	16	0	0	0	2	0	1	1	0	0	2	0	1	0	1	0	55	99	22	71	88	106	17	19	15	5	11	3	5	2	5
16S_OTU00448	Bacteria	Acidobacteria	Blastocatellia_(Subgroup_4)	Blastocatellales	Blastocatellaceae	Stenotrophobacter	39.0954	0.370555	0.0001	0.000507407	-0.653091	0.653091	0.439359	0.981097	598	0.000487055	21	19	21	24	23	17	45	17	35	8	15	9	5	10	9	9	9	7	37	42	13	30	44	32	3	6	13	4	5	4	12	13	11
16S_OTU00462	Bacteria	Verrucomicrobia	Verrucomicrobiae	Chthoniobacterales	Chthoniobacteraceae	Chthoniobacter	26.9001	0.219223	0.0001	0.000507407	0.438514	-0.438514	1.01831	0.784002	277	0.000225609	0	0	2	0	0	0	0	0	0	4	5	13	47	70	51	7	5	48	0	0	0	0	0	0	0	0	0	15	9	1	0	0	0
16S_OTU00466	Bacteria	Proteobacteria	Gammaproteobacteria	Steroidobacterales	Steroidobacteraceae	unclassified	51.749	0.349696	0.0001	0.000507407	-0.552016	0.552016	0.607064	1.02225	623	0.000507417	4	8	2	1	0	2	2	2	3	2	12	4	0	1	3	2	2	4	52	59	55	31	44	76	30	45	38	6	24	10	22	13	18
16S_OTU00471	Bacteria	Actinobacteria	Actinobacteria	Propionibacteriales	Nocardioidaceae	unclassified	76.3838	0.528926	0.0001	0.000507407	-0.00991361	0.00991361	0.490309	1.34841	1322	0.00107673	49	40	50	78	77	60	88	72	62	31	30	38	22	29	27	49	29	38	37	33	27	49	33	44	27	28	39	15	14	12	15	15	26
16S_OTU00476	Bacteria	Verrucomicrobia	Verrucomicrobiae	Chthoniobacterales	Chthoniobacteraceae	Chthoniobacter	49.2754	0.380315	0.0001	0.000507407	-0.225721	0.225721	0.926262	1.04545	834	0.00067927	21	13	28	18	17	12	26	19	25	41	39	48	36	39	33	48	34	64	18	14	24	16	11	16	5	3	4	30	57	17	11	18	6
16S_OTU00478	Bacteria	Proteobacteria	Alphaproteobacteria	unclassified	unclassified	unclassified	19.7027	0.101865	0.0001	0.000507407	-0.405998	0.405998	0.819184	1.01917	230	0.000187329	0	0	0	0	2	1	9	5	4	0	3	0	0	0	0	1	1	2	1	1	8	1	3	3	3	2	0	43	77	29	1	6	1
16S_OTU00479	Bacteria	Planctomycetes	Planctomycetacia	Pirellulales	Pirellulaceae	unclassified	20.3802	0.286077	0.0001	0.000507407	0.374264	-0.374264	1.25673	0.427586	938	0.000763976	22	22	18	21	15	22	29	15	34	14	24	19	16	16	25	30	37	35	29	27	33	12	20	13	24	18	29	18	18	40	54	37	35
16S_OTU00495	Bacteria	Chloroflexi	Anaerolineae	SBR1031	A4b	unclassified	43.1617	0.255484	0.0001	0.000507407	0.130015	-0.130015	1.09217	0.911143	127	0.000103438	0	0	0	0	0	0	0	0	0	0	1	0	0	0	0	0	0	0	4	7	0	3	4	1	2	0	1	3	6	3	17	15	21
16S_OTU00506	Bacteria	Bacteroidetes	Bacteroidia	Chitinophagales	Chitinophagaceae	Parafilimonas	23.7653	0.293669	0.0001	0.000507407	0.0175182	-0.0175182	1.03413	0.994359	643	0.000523706	53	58	122	36	35	28	27	40	57	37	7	16	13	11	21	9	9	13	3	6	15	7	2	3	3	1	3	4	2	0	1	0	0
16S_OTU00511	Bacteria	Gemmatimonadetes	Gemmatimonadetes	Gemmatimonadales	Gemmatimonadaceae	unclassified	68.949	0.42858	0.0001	0.000507407	-0.246052	0.246052	0.622405	1.24227	589	0.000479725	24	23	15	23	15	15	21	27	36	4	16	11	3	3	9	5	7	1	29	45	36	25	50	60	13	6	9	2	1	4	6	13	3
16S_OTU00514	Bacteria	Acidobacteria	Holophagae	Subgroup_7	unclassified	unclassified	70.3154	0.422275	0.0001	0.000507407	0.135744	-0.135744	0.726071	1.22173	171	0.000139275	13	18	23	20	27	10	25	10	23	0	0	0	0	1	0	0	0	1	0	0	0	0	0	0	0	0	0	0	0	0	0	0	0
16S_OTU00518	Bacteria	Chloroflexi	Anaerolineae	Anaerolineales	Anaerolineaceae	Anaerolinea	7.9948	0.0937464	0.0001	0.000507407	-0.290392	0.290392	0.722715	1.1653	342	0.00027855	0	0	0	0	0	0	3	0	0	0	2	0	0	0	0	0	0	0	10	16	3	69	35	186	3	3	5	0	7	0	0	0	0
16S_OTU00519	Bacteria	Planctomycetes	Planctomycetacia	Gemmatales	Gemmataceae	unclassified	30.6142	0.421188	0.0001	0.000507407	0.28477	-0.28477	1.03546	0.902728	628	0.000511489	28	13	18	7	19	11	20	15	14	13	24	19	19	26	24	36	24	57	6	6	12	4	6	6	6	11	19	8	16	25	21	17	16
16S_OTU00521	Bacteria	Bacteroidetes	Bacteroidia	Chitinophagales	Chitinophagaceae	unclassified	37.2411	0.322585	0.0001	0.000507407	-0.538621	0.538621	0.568541	1.05888	174	0.000141718	13	15	6	14	15	18	12	3	3	3	2	4	1	3	3	0	0	2	3	0	4	1	2	1	7	15	11	3	8	1	1	0	0
16S_OTU00528	Bacteria	Verrucomicrobia	Verrucomicrobiae	Chthoniobacterales	Chthoniobacteraceae	Chthoniobacter	34.9162	0.357466	0.0001	0.000507407	0.127577	-0.127577	0.624271	1.27853	283	0.000230496	14	10	12	5	10	5	5	10	11	20	17	29	19	32	22	22	16	12	0	0	1	1	0	1	0	0	0	5	2	2	0	0	0
16S_OTU00531	Bacteria	Proteobacteria	Gammaproteobacteria	Xanthomonadales	Xanthomonadaceae	Lysobacter	35.3723	0.175373	0.0001	0.000507407	-0.378699	0.378699	0.891161	0.980284	173	0.000140904	0	0	0	1	0	0	0	2	0	0	0	0	0	0	0	0	0	0	20	9	10	3	4	6	22	41	27	0	0	0	6	4	5
16S_OTU00537	Bacteria	Planctomycetes	Phycisphaerae	Tepidisphaerales	WD2101_soil_group	unclassified	25.6664	0.28317	0.0001	0.000507407	0.452943	-0.452943	1.08802	0.663771	319	0.000259817	3	3	3	6	3	2	5	3	14	3	8	4	6	3	3	5	2	10	23	17	15	19	23	17	13	24	24	3	11	6	6	10	7
16S_OTU00542	Bacteria	Firmicutes	Clostridia	Clostridiales	Peptostreptococcaceae	unclassified	20.7911	0.1611	0.0001	0.000507407	-0.0572047	0.0572047	1.06554	0.957353	272	0.000221537	12	11	14	29	20	11	24	21	26	2	2	1	1	1	3	1	3	1	1	0	3	2	2	0	7	15	7	19	6	11	2	5	0
16S_OTU00543	Bacteria	Proteobacteria	Gammaproteobacteria	Betaproteobacteriales	Burkholderiaceae	unclassified	110.503	0.456948	0.0001	0.000507407	0.0841604	-0.0841604	0.780486	1.19778	568	0.000462621	24	17	25	16	16	5	19	12	14	9	10	18	8	7	14	7	4	9	30	33	32	41	30	44	17	23	20	7	10	4	9	10	7
16S_OTU00559	Bacteria	Proteobacteria	Alphaproteobacteria	Rhizobiales	Labraceae	Labrys	26.2402	0.285568	0.0001	0.000507407	0.118239	-0.118239	0.806143	1.17446	272	0.000221537	7	5	10	5	13	9	7	14	11	28	19	19	16	18	12	22	23	15	1	1	0	1	4	0	4	0	2	1	2	0	0	1	1
16S_OTU00560	Bacteria	Acidobacteria	Thermoanaerobaculia	Thermoanaerobaculales	Thermoanaerobaculaceae	Subgroup_10	78.4862	0.286905	0.0001	0.000507407	-0.172082	0.172082	0.803086	1.1624	310	0.000252487	32	51	43	15	12	16	21	22	31	6	3	6	10	11	12	1	3	4	0	0	1	0	0	0	4	1	1	3	1	0	0	0	0
16S_OTU00562	Bacteria	Proteobacteria	Alphaproteobacteria	Rhizobiales	Hyphomicrobiaceae	Pedomicrobium	48.2845	0.546819	0.0001	0.000507407	-0.553606	0.553606	0.617265	1.01429	1221	0.000994471	21	28	19	37	32	23	27	45	38	23	55	42	37	39	31	54	64	55	33	11	19	10	17	21	27	19	28	45	34	47	47	56	36
16S_OTU00566	Bacteria	Proteobacteria	Gammaproteobacteria	Xanthomonadales	Xanthomonadaceae	Lysobacter	134.1	0.315483	0.0001	0.000507407	-0.396047	0.396047	0.820052	1.02673	494	0.00040235	2	4	4	2	1	1	2	1	6	0	8	5	1	4	1	7	6	7	22	22	21	9	7	14	5	5	11	14	9	22	48	47	49
16S_OTU00568	Bacteria	Armatimonadetes	Fimbriimonadia	Fimbriimonadales	Fimbriimonadaceae	unclassified	36.6303	0.20167	0.0001	0.000507407	-0.140869	0.140869	0.927474	1.07545	138	0.000112397	0	0	0	0	0	0	0	0	0	0	0	0	0	0	0	0	0	0	18	2	2	4	9	9	21	39	29	1	2	0	1	0	0
16S_OTU00573	Bacteria	Chloroflexi	Anaerolineae	Caldilineales	Caldilineaceae	Litorilinea	28.6089	0.304893	0.0001	0.000507407	-0.12184	0.12184	0.463409	1.34634	284	0.00023131	4	9	1	5	1	1	8	2	3	0	9	4	0	2	1	5	1	2	23	27	19	12	21	30	9	18	12	8	4	5	11	7	9
16S_OTU00580	Bacteria	Chloroflexi	Anaerolineae	SBR1031	unclassified	unclassified	51.5697	0.289094	0.0001	0.000507407	-0.530138	0.530138	0.717657	0.973979	234	0.000190587	0	0	0	0	0	0	0	1	0	0	2	0	0	0	0	0	1	0	12	10	5	4	6	1	5	12	2	7	10	11	25	22	33
16S_OTU00590	Bacteria	Latescibacteria	unclassified	unclassified	unclassified	unclassified	27.2166	0.245671	0.0001	0.000507407	0.319142	-0.319142	0.985239	0.934046	185	0.000150677	0	1	1	0	1	0	0	0	0	2	5	1	6	0	4	0	0	0	4	3	9	3	4	8	2	4	1	1	0	9	30	13	21
16S_OTU00591	Bacteria	Acidobacteria	Subgroup_17	unclassified	unclassified	unclassified	35.3891	0.310327	0.0001	0.000507407	0.254493	-0.254493	1.27565	0.542565	359	0.000292396	1	1	0	3	0	1	1	1	4	1	14	6	0	0	3	4	3	2	14	13	12	4	8	16	11	7	13	7	11	20	23	39	25
16S_OTU00595	Bacteria	Verrucomicrobia	Verrucomicrobiae	Verrucomicrobiales	Verrucomicrobiaceae	Verrucomicrobium	20.2439	0.261676	0.0001	0.000507407	0.544742	-0.544742	1.05396	0.565332	309	0.000251672	3	4	11	2	4	4	10	10	6	4	2	1	0	0	2	2	1	15	16	15	33	41	20	27	11	13	9	5	8	2	5	1	5
16S_OTU00616	Bacteria	Chloroflexi	Anaerolineae	Anaerolineales	Anaerolineaceae	unclassified	20.6165	0.247573	0.0001	0.000507407	0.0443449	-0.0443449	0.992028	1.03467	1489	0.00121275	107	97	82	72	130	80	88	50	89	22	25	29	36	38	24	53	44	50	23	12	40	12	14	11	21	23	32	19	23	9	26	31	17
16S_OTU00625	Bacteria	Chloroflexi	Chloroflexia	Chloroflexales	Roseiflexaceae	unclassified	101.558	0.386361	0.0001	0.000507407	-0.592629	0.592629	0.613017	0.969173	197	0.000160451	0	0	0	1	0	0	3	2	3	0	5	2	0	1	0	0	1	1	23	23	16	23	20	27	22	8	10	1	1	1	0	1	2
16S_OTU00639	Bacteria	Actinobacteria	Actinobacteria	Frankiales	unclassified	unclassified	152.997	0.553599	0.0001	0.000507407	-0.398683	0.398683	0.442142	1.23561	1206	0.000982254	74	54	92	113	102	64	104	95	89	22	21	22	24	20	41	13	18	16	19	15	11	29	19	20	7	21	16	5	14	4	8	7	10
16S_OTU00640	Bacteria	Planctomycetes	OM190	unclassified	unclassified	unclassified	49.4285	0.257467	0.0001	0.000507407	0.352789	-0.352789	0.822254	1.0579	538	0.000438186	2	2	3	4	2	5	13	19	18	3	4	5	2	10	2	8	14	16	14	8	16	2	5	5	11	16	19	10	11	23	48	50	29
16S_OTU00641	Bacteria	Planctomycetes	Planctomycetacia	Gemmatales	Gemmataceae	unclassified	18.6363	0.265168	0.0001	0.000507407	-0.640395	0.640395	0.704558	0.833044	485	0.000395019	14	21	8	7	10	7	21	20	16	29	20	46	24	28	30	24	32	13	10	7	8	3	4	7	9	7	7	10	12	3	3	5	7
16S_OTU00646	Bacteria	Proteobacteria	Deltaproteobacteria	Myxococcales	BIrii41	unclassified	44.3188	0.248094	0.0001	0.000507407	0.44667	-0.44667	1.24572	0.29071	216	0.000175926	0	0	0	0	0	0	0	0	0	0	2	0	0	0	0	0	0	1	3	6	6	1	3	1	9	13	17	5	14	9	22	27	22
16S_OTU00647	Bacteria	Verrucomicrobia	Verrucomicrobiae	Pedosphaerales	Pedosphaeraceae	unclassified	47.2931	0.129345	0.0001	0.000507407	0.621231	-0.621231	0.872611	0.692904	163	0.000132759	30	40	61	12	7	5	0	0	0	3	0	0	2	1	2	0	0	0	0	0	0	0	0	0	0	0	0	0	0	0	0	0	0
16S_OTU00648	Bacteria	Planctomycetes	Phycisphaerae	Tepidisphaerales	WD2101_soil_group	unclassified	73.7883	0.338012	0.0001	0.000507407	0.57655	-0.57655	0.903199	0.734254	183	0.000149049	0	0	0	0	0	0	0	0	0	0	1	0	0	0	0	0	0	0	23	25	20	15	36	32	13	6	11	1	0	0	0	0	0
16S_OTU00664	Bacteria	Cyanobacteria	Oxyphotobacteria	Chloroplast	unclassified	unclassified	34.5716	0.331409	0.0001	0.000507407	-0.1937	0.1937	1.11046	0.863858	489	0.000398277	12	11	26	73	36	29	26	33	26	15	11	11	2	10	1	4	1	3	10	26	19	16	8	13	1	8	9	5	5	1	11	5	6
16S_OTU00665	Bacteria	Bacteroidetes	Bacteroidia	Chitinophagales	Chitinophagaceae	Parasegetibacter	32.7819	0.273813	0.0001	0.000507407	0.186024	-0.186024	0.897487	1.08631	349	0.000284251	7	2	12	9	8	9	5	3	7	4	6	10	5	6	6	7	3	13	30	11	18	26	21	26	14	20	13	8	10	5	7	6	6
16S_OTU00672	Bacteria	Acidobacteria	Acidobacteriia	Solibacterales	Solibacteraceae_(Subgroup_3)	Bryobacter	26.2672	0.200118	0.0001	0.000507407	-0.240313	0.240313	0.688691	1.20923	113	9.20354e-05	12	10	7	3	3	3	0	0	0	14	7	10	10	7	8	5	4	8	0	0	0	0	0	0	0	0	0	0	1	1	0	0	0
16S_OTU00673	Bacteria	unclassified	unclassified	unclassified	unclassified	unclassified	17.8591	0.159557	0.0001	0.000507407	0.69903	-0.69903	0.900254	0.462162	431	0.000351038	6	12	3	68	61	24	21	21	30	23	7	14	6	15	1	13	8	16	0	9	5	10	20	22	1	1	2	1	1	1	4	0	1
16S_OTU00676	Bacteria	Proteobacteria	Alphaproteobacteria	Sphingomonadales	Sphingomonadaceae	Sphingomonas	54.0592	0.394649	0.0001	0.000507407	0.312345	-0.312345	0.947257	0.977205	1329	0.00108243	21	15	23	40	69	23	36	51	28	3	14	4	7	14	5	8	3	5	91	103	42	117	98	111	34	59	40	10	31	14	61	50	30
16S_OTU00684	Bacteria	Bacteroidetes	Bacteroidia	Chitinophagales	Chitinophagaceae	unclassified	96.1216	0.569243	0.0001	0.000507407	-0.12347	0.12347	1.22103	0.731863	305	0.000248414	16	19	29	24	23	21	41	19	23	1	0	0	0	0	0	0	0	0	13	12	3	27	21	12	0	0	0	0	1	0	0	0	0
16S_OTU00686	Bacteria	Bacteroidetes	Bacteroidia	Cytophagales	Microscillaceae	unclassified	39.7959	0.217219	0.0001	0.000507407	-0.647093	0.647093	0.620639	0.887079	396	0.000322531	0	0	5	3	1	3	2	4	4	0	1	1	2	1	2	3	1	2	52	34	48	13	23	17	16	28	22	17	23	12	13	10	10
16S_OTU00689	Bacteria	Proteobacteria	Gammaproteobacteria	Betaproteobacteriales	Nitrosomonadaceae	Ellin6067	31.9251	0.445442	0.0001	0.000507407	0.440957	-0.440957	0.988116	0.818955	179	0.000145791	0	0	0	0	1	1	0	1	2	5	17	12	18	5	13	11	10	31	1	0	0	3	2	1	1	4	0	1	1	5	9	3	5
16S_OTU00690	Bacteria	Bacteroidetes	Bacteroidia	Flavobacteriales	Flavobacteriaceae	Flavobacterium	23.3529	0.202496	0.0001	0.000507407	0.147055	-0.147055	0.903087	1.09429	195	0.000158822	5	7	5	2	2	3	1	0	0	8	2	1	2	6	3	2	0	9	11	11	16	19	15	20	5	10	9	3	2	1	3	1	3
16S_OTU00692	Bacteria	Cyanobacteria	Oxyphotobacteria	Chloroplast	unclassified	unclassified	6.86118	0.127786	0.0001	0.000507407	0.274429	-0.274429	0.921081	1.02516	209	0.000170225	0	0	0	0	0	0	0	0	0	25	16	104	10	6	11	12	3	1	1	0	0	0	0	0	0	0	0	0	0	0	0	1	1
16S_OTU00708	Bacteria	Planctomycetes	OM190	unclassified	unclassified	unclassified	26.2745	0.274665	0.0001	0.000507407	-0.643207	0.643207	0.435677	0.996447	262	0.000213392	0	0	1	6	8	13	0	1	3	2	14	10	9	17	16	15	12	22	9	2	10	2	2	6	5	5	9	14	11	13	7	4	5
16S_OTU00709	Bacteria	Proteobacteria	Gammaproteobacteria	Betaproteobacteriales	SC-I-84	unclassified	67.8249	0.314191	0.0001	0.000507407	0.791883	-0.791883	0.751438	0.407719	251	0.000204433	39	34	35	26	29	14	4	11	18	7	1	0	7	3	3	8	2	4	1	1	1	1	0	0	1	1	0	0	0	0	0	0	0
16S_OTU00710	Bacteria	Actinobacteria	Acidimicrobiia	Microtrichales	unclassified	unclassified	24.5643	0.45471	0.0001	0.000507407	-0.477248	0.477248	0.550391	1.12852	199	0.00016208	10	14	11	8	15	6	15	14	13	7	2	6	1	8	3	3	3	9	14	4	2	4	5	9	5	3	0	2	2	0	0	0	1
16S_OTU00713	Bacteria	Planctomycetes	Planctomycetacia	Planctomycetales	unclassified	unclassified	81.3826	0.332325	0.0001	0.000507407	0.383507	-0.383507	1.14886	0.653816	610	0.000496828	0	3	0	3	3	4	5	20	17	1	18	10	5	5	0	13	16	14	16	1	16	3	2	5	2	0	0	3	13	31	80	60	50
16S_OTU00719	Bacteria	Planctomycetes	Phycisphaerae	Tepidisphaerales	WD2101_soil_group	unclassified	17.2791	0.262923	0.0001	0.000507407	-0.255565	0.255565	1.00339	0.955892	229	0.000186514	13	21	38	14	36	15	22	13	16	15	1	3	6	8	8	0	0	0	0	0	0	0	0	0	0	0	0	0	0	0	0	0	0
16S_OTU00723	Bacteria	Bacteroidetes	Bacteroidia	Chitinophagales	Chitinophagaceae	unclassified	30.318	0.145231	0.0001	0.000507407	-0.399938	0.399938	0.713372	1.10055	186	0.000151492	1	1	3	7	8	4	0	3	4	7	1	0	32	44	33	19	3	14	0	0	0	0	0	0	0	0	0	2	0	0	0	0	0
16S_OTU00725	Bacteria	Proteobacteria	Gammaproteobacteria	EPR3968-O8a-Bc78	unclassified	unclassified	408.091	0.117802	0.0001	0.000507407	-0.144732	0.144732	0.882412	1.11167	176	0.000143347	0	0	0	0	0	0	0	0	0	0	0	0	0	0	0	0	0	0	5	2	5	0	5	1	49	49	51	0	0	0	2	0	0
16S_OTU00731	Bacteria	Proteobacteria	Gammaproteobacteria	Betaproteobacteriales	Nitrosomonadaceae	MND1	29.0234	0.264572	0.0001	0.000507407	-0.192266	0.192266	1.27457	0.59667	885	0.000720808	23	32	29	34	32	31	47	21	32	12	21	23	32	38	34	50	28	40	15	7	10	2	4	3	20	28	18	17	25	20	34	23	22
16S_OTU00738	Bacteria	Proteobacteria	Gammaproteobacteria	R7C24	unclassified	unclassified	42.2603	0.425629	0.0001	0.000507407	0.193449	-0.193449	0.678223	1.23272	175	0.000142533	8	14	8	17	6	7	16	21	17	3	4	2	1	3	1	4	2	3	11	2	4	1	5	2	2	1	2	1	1	0	1	3	0
16S_OTU00740	Bacteria	Verrucomicrobia	Verrucomicrobiae	Pedosphaerales	Pedosphaeraceae	unclassified	15.841	0.193031	0.0001	0.000507407	-0.458975	0.458975	0.751868	1.02344	161	0.00013113	0	0	0	0	0	1	1	1	2	0	2	0	1	0	0	0	2	2	26	15	11	7	9	8	14	10	7	1	3	3	9	7	6
16S_OTU00755	Bacteria	Gemmatimonadetes	Gemmatimonadetes	Gemmatimonadales	Gemmatimonadaceae	unclassified	57.7438	0.46348	0.0001	0.000507407	0.191694	-0.191694	1.02091	0.968888	492	0.000400721	31	24	15	16	20	9	14	19	33	6	10	7	1	0	1	4	2	3	26	32	13	42	24	43	14	11	8	1	3	4	7	8	13
16S_OTU00762	Bacteria	Acidobacteria	Holophagae	Subgroup_7	unclassified	unclassified	16.3568	0.148201	0.0001	0.000507407	0.543894	-0.543894	1.15912	0.298046	367	0.000298912	36	46	66	10	21	13	34	19	29	26	0	13	21	20	13	0	0	0	0	0	0	0	0	0	0	0	0	0	0	0	0	0	0
16S_OTU00765	Bacteria	Planctomycetes	Phycisphaerae	Tepidisphaerales	WD2101_soil_group	unclassified	18.5373	0.142243	0.0001	0.000507407	0.286936	-0.286936	1.05887	0.873647	261	0.000212577	0	0	0	0	0	0	0	0	0	0	2	0	0	0	0	0	0	0	10	11	7	1	7	2	6	11	20	0	1	9	50	25	26
16S_OTU00766	Bacteria	Acidobacteria	Holophagae	Subgroup_7	unclassified	unclassified	214.448	0.345813	0.0001	0.000507407	0.479624	-0.479624	1.0141	0.737081	357	0.000290767	1	1	0	0	0	0	5	1	1	0	6	1	0	0	0	1	1	2	48	32	31	37	46	51	18	20	16	4	4	5	7	4	2
16S_OTU00767	Bacteria	Planctomycetes	Planctomycetacia	Gemmatales	Gemmataceae	unclassified	45.5107	0.27963	0.0001	0.000507407	0.795908	-0.795908	0.807567	0.255331	273	0.000222351	9	6	4	9	12	8	2	12	10	11	5	23	32	35	28	20	20	24	0	0	0	0	0	0	0	0	0	3	0	0	0	0	0
16S_OTU00770	Bacteria	Proteobacteria	Gammaproteobacteria	Betaproteobacteriales	Nitrosomonadaceae	Ellin6067	71.7541	0.615683	0.0001	0.000507407	0.380762	-0.380762	1.06419	0.786963	432	0.000351852	1	0	4	0	2	3	7	8	3	17	24	31	10	28	23	27	8	31	2	2	5	1	0	0	6	11	15	25	22	35	13	14	13
16S_OTU00773	Bacteria	Proteobacteria	Deltaproteobacteria	Myxococcales	Phaselicystidaceae	Phaselicystis	32.9646	0.431573	0.0001	0.000507407	-0.0467299	0.0467299	0.995718	1.03089	682	0.00055547	28	22	36	11	16	17	18	17	23	17	23	24	26	16	42	36	29	31	9	15	13	4	5	8	10	10	17	24	22	18	13	13	23
16S_OTU00774	Bacteria	Planctomycetes	Phycisphaerae	Phycisphaerales	Phycisphaeraceae	AKYG587	52.9992	0.26022	0.0001	0.000507407	-0.456329	0.456329	0.387132	1.2116	119	9.69223e-05	0	0	0	0	0	0	0	0	0	0	0	0	0	0	0	0	0	0	1	3	0	0	1	1	1	0	0	1	1	6	20	13	27
16S_OTU00783	Bacteria	Proteobacteria	Gammaproteobacteria	Xanthomonadales	Rhodanobacteraceae	unclassified	16.3717	0.125578	0.0001	0.000507407	-0.342546	0.342546	0.807776	1.07603	254	0.000206876	0	0	0	0	0	0	0	0	0	0	0	0	0	0	0	0	0	0	13	20	16	6	9	21	22	33	29	4	1	2	13	15	12
16S_OTU00785	Bacteria	Chloroflexi	Anaerolineae	Anaerolineales	Anaerolineaceae	unclassified	16.3267	0.155053	0.0001	0.000507407	-0.482405	0.482405	0.782637	0.976471	83	6.76012e-05	0	0	0	0	0	0	2	2	4	0	0	0	0	0	0	0	0	0	2	2	3	1	0	0	4	3	2	3	5	3	7	6	5
16S_OTU00792	Bacteria	Latescibacteria	unclassified	unclassified	unclassified	unclassified	44.2657	0.398736	0.0001	0.000507407	-0.327483	0.327483	0.632662	1.19643	219	0.00017837	12	23	48	1	2	1	15	8	14	1	2	4	0	1	0	0	0	1	5	14	4	16	9	22	8	3	4	0	1	0	0	0	0
16S_OTU00793	Bacteria	Planctomycetes	Phycisphaerae	Tepidisphaerales	WD2101_soil_group	unclassified	413.518	0.277511	0.0001	0.000507407	0.49332	-0.49332	1.13482	0.505616	149	0.000121356	0	0	0	0	0	0	0	0	0	0	0	0	0	0	0	0	0	0	1	0	1	0	2	2	0	0	0	1	1	5	27	22	25
16S_OTU00795	Bacteria	Bacteroidetes	Bacteroidia	Cytophagales	Microscillaceae	unclassified	23.5129	0.234488	0.0001	0.000507407	-0.201672	0.201672	0.774566	1.17164	217	0.000176741	0	4	0	1	4	6	7	9	12	1	6	6	1	4	5	19	9	20	1	0	2	0	0	1	5	2	12	17	8	15	5	2	6
16S_OTU00808	Bacteria	Planctomycetes	Phycisphaerae	Tepidisphaerales	Tepidisphaeraceae	unclassified	11.196	0.200187	0.0001	0.000507407	-0.193852	0.193852	0.775154	1.17404	131	0.000106696	7	9	6	16	41	7	1	13	5	0	0	1	0	3	0	0	0	0	2	5	0	1	9	1	0	0	0	0	2	0	0	1	0
16S_OTU00818	Bacteria	Bacteroidetes	Bacteroidia	Chitinophagales	Chitinophagaceae	UTBCD1	130.281	0.448972	0.0001	0.000507407	0.468238	-0.468238	0.927566	0.85683	316	0.000257373	32	34	27	33	40	21	33	28	28	9	2	8	2	7	7	0	2	2	0	0	0	0	0	0	1	0	0	0	0	0	0	0	0
16S_OTU00836	Bacteria	Acidobacteria	Acidobacteriia	Acidobacteriales	unclassified	unclassified	13.7622	0.158995	0.0001	0.000507407	-0.132334	0.132334	0.773979	1.19277	328	0.000267147	20	27	1	8	16	10	74	41	39	18	1	0	1	14	9	0	4	2	8	0	5	0	3	2	7	2	2	0	0	3	0	5	0
16S_OTU00854	Bacteria	Verrucomicrobia	Verrucomicrobiae	Chthoniobacterales	Chthoniobacteraceae	Candidatus_Udaeobacter	28.825	0.233673	0.0001	0.000507407	0.0404263	-0.0404263	0.55727	1.32091	328	0.000267147	13	18	17	34	44	26	41	29	23	3	2	15	8	10	8	10	7	18	0	0	0	0	0	0	0	0	0	0	2	0	0	0	0
16S_OTU00858	Bacteria	Verrucomicrobia	Verrucomicrobiae	Chthoniobacterales	Chthoniobacteraceae	Chthoniobacter	23.3149	0.289532	0.0001	0.000507407	-0.187829	0.187829	0.817415	1.14715	326	0.000265518	9	7	8	18	11	8	10	16	20	5	11	13	8	18	15	25	21	20	1	1	4	0	2	1	5	3	5	12	5	7	6	8	3
16S_OTU00865	Bacteria	Proteobacteria	Alphaproteobacteria	Rhizobiales	Rhizobiaceae	Phyllobacterium	20.78	0.356524	0.0001	0.000507407	-0.487742	0.487742	0.629296	1.07659	189	0.000153935	0	1	1	1	0	0	2	4	0	2	3	2	2	0	1	5	3	4	3	8	9	5	10	5	9	4	5	12	16	6	16	11	13
16S_OTU00868	Bacteria	Gemmatimonadetes	Gemmatimonadetes	Gemmatimonadales	Gemmatimonadaceae	unclassified	29.5165	0.230517	0.0001	0.000507407	-0.167635	0.167635	1.04329	0.954395	409	0.000333119	26	43	33	31	25	22	20	25	20	2	3	5	8	5	8	21	14	9	4	2	4	2	1	13	13	7	2	13	19	7	0	0	0
16S_OTU00869	Bacteria	Chloroflexi	Gitt-GS-136	unclassified	unclassified	unclassified	71.8139	0.364601	0.0001	0.000507407	-0.0441992	0.0441992	1.08976	0.931193	90	7.33026e-05	5	1	1	15	10	7	9	9	6	0	1	0	1	0	0	0	1	1	1	0	1	6	3	8	1	0	0	0	0	1	0	1	0
16S_OTU00870	Bacteria	Verrucomicrobia	Verrucomicrobiae	Chthoniobacterales	Chthoniobacteraceae	Chthoniobacter	46.3091	0.432495	0.0001	0.000507407	-0.361989	0.361989	0.699362	1.13676	305	0.000248414	3	1	4	10	5	8	3	14	4	9	27	22	13	13	16	28	20	21	5	3	4	2	5	6	3	1	4	10	6	6	6	8	6
16S_OTU00877	Bacteria	Planctomycetes	OM190	unclassified	unclassified	unclassified	24.1197	0.412998	0.0001	0.000507407	-0.491274	0.491274	0.752237	0.990893	549	0.000447146	12	21	25	11	19	14	15	18	18	16	12	18	19	29	22	46	18	22	4	6	11	4	5	7	8	4	3	25	18	9	14	15	11
16S_OTU00878	Bacteria	Acidobacteria	Subgroup_6	unclassified	unclassified	unclassified	17.4496	0.228963	0.0001	0.000507407	0.379304	-0.379304	1.03247	0.829555	76	6.18999e-05	0	0	0	0	0	0	0	0	0	0	0	0	0	0	0	0	0	0	3	4	4	5	1	1	0	0	2	0	6	6	7	8	6
16S_OTU00891	Bacteria	Proteobacteria	Gammaproteobacteria	Betaproteobacteriales	Rhodocyclaceae	unclassified	41.487	0.553601	0.0001	0.000507407	0.120331	-0.120331	1.04824	0.964034	121	9.85512e-05	1	0	2	3	1	0	1	2	6	8	6	7	5	3	11	4	3	5	0	0	0	0	0	0	0	0	1	1	0	10	6	6	6
16S_OTU00916	Bacteria	Planctomycetes	Phycisphaerae	Tepidisphaerales	Tepidisphaeraceae	Tepidisphaera	57.3074	0.423055	0.0001	0.000507407	-0.292379	0.292379	0.910768	1.02386	184	0.000149863	2	3	11	12	15	9	16	7	8	2	3	2	2	1	3	9	5	2	9	12	9	9	9	10	1	3	1	1	2	0	2	1	3
16S_OTU00917	Bacteria	Bacteroidetes	Bacteroidia	Chitinophagales	Chitinophagaceae	Segetibacter	52.2798	0.381982	0.0001	0.000507407	0.237919	-0.237919	0.975552	0.993605	119	9.69223e-05	3	9	5	15	27	9	15	11	10	0	0	0	0	0	0	0	0	0	1	1	1	5	3	4	0	0	0	0	0	0	0	0	0
16S_OTU00923	Bacteria	Bacteroidetes	Bacteroidia	Chitinophagales	Chitinophagaceae	unclassified	19.7994	0.129239	0.0001	0.000507407	0.0851607	-0.0851607	1.31249	0.566425	159	0.000129501	4	3	9	0	0	0	2	0	0	3	2	2	1	0	1	1	0	1	12	17	11	16	14	20	2	0	2	4	11	1	4	2	8
16S_OTU00929	Bacteria	Cyanobacteria	Oxyphotobacteria	Chloroplast	unclassified	unclassified	19.7365	0.346758	0.0001	0.000507407	0.0349011	-0.0349011	0.785286	1.19982	105	8.55196e-05	4	8	15	7	6	2	2	7	7	6	4	3	3	1	2	2	0	1	5	2	4	2	1	2	1	3	2	0	0	1	1	0	0
16S_OTU00931	Bacteria	Proteobacteria	Alphaproteobacteria	Sphingomonadales	Sphingomonadaceae	Sphingobium	76.9753	0.384613	0.0001	0.000507407	-0.278306	0.278306	0.613349	1.23232	239	0.000194659	18	2	14	6	2	0	2	2	2	1	4	2	0	3	1	0	1	1	22	26	12	11	5	8	24	33	28	3	5	0	0	0	0
16S_OTU00934	Bacteria	Planctomycetes	Phycisphaerae	Tepidisphaerales	WD2101_soil_group	unclassified	62.9218	0.364968	0.0001	0.000507407	-0.031092	0.031092	1.08348	0.939598	304	0.0002476	32	34	33	15	14	10	6	12	15	7	3	1	3	7	6	4	3	4	11	5	8	11	9	5	1	9	5	3	10	3	5	2	2
16S_OTU00935	Bacteria	Planctomycetes	Phycisphaerae	Tepidisphaerales	WD2101_soil_group	unclassified	20.4106	0.184367	0.0001	0.000507407	-0.349212	0.349212	0.956195	0.941419	229	0.000186514	0	0	0	0	0	0	0	0	1	0	0	0	0	0	0	0	0	0	26	14	7	7	9	17	25	26	31	4	6	3	5	11	13
16S_OTU00936	Bacteria	Planctomycetes	Phycisphaerae	CCM11a	unclassified	unclassified	14.3706	0.209477	0.0001	0.000507407	-0.580126	0.580126	0.804771	0.835752	196	0.000159637	0	0	0	0	0	0	0	0	0	0	0	0	0	0	0	0	3	2	0	0	1	0	1	1	0	0	0	2	0	17	33	27	9
16S_OTU00939	Bacteria	Patescibacteria	Parcubacteria	unclassified	unclassified	unclassified	23.7403	0.154798	0.0001	0.000507407	-0.555122	0.555122	0.899769	0.772441	145	0.000118099	7	8	10	21	18	18	2	10	12	2	4	5	1	4	4	3	7	9	0	0	0	0	0	0	0	0	0	0	0	0	0	0	0
16S_OTU00940	Bacteria	Planctomycetes	Phycisphaerae	CCM11a	unclassified	unclassified	24.2028	0.21755	0.0001	0.000507407	-0.203229	0.203229	0.955864	1.02844	119	9.69223e-05	0	0	0	0	0	0	0	0	7	0	0	0	0	0	0	0	0	0	3	4	4	0	1	0	0	0	3	0	0	11	17	18	10
16S_OTU00945	Bacteria	Proteobacteria	Gammaproteobacteria	Betaproteobacteriales	SC-I-84	unclassified	50.8829	0.460203	0.0001	0.000507407	0.208719	-0.208719	1.10595	0.862229	598	0.000487055	11	16	35	59	39	27	38	39	38	5	4	8	12	5	3	8	8	12	8	10	13	23	15	20	31	29	9	1	9	10	8	7	19
16S_OTU00951	Bacteria	Planctomycetes	Planctomycetacia	Gemmatales	Gemmataceae	Gemmata	20.5044	0.285376	0.0001	0.000507407	-0.607132	0.607132	0.672699	0.908689	162	0.000131945	6	8	3	8	6	10	1	3	8	6	3	7	11	5	11	13	12	8	1	0	0	1	0	0	0	1	0	8	4	7	0	3	1
16S_OTU00967	Bacteria	Proteobacteria	Gammaproteobacteria	Betaproteobacteriales	Burkholderiaceae	Comamonas	36.9827	0.440238	0.0001	0.000507407	0.628673	-0.628673	0.87681	0.673104	441	0.000359183	1	0	1	0	0	0	0	0	1	0	5	32	1	1	0	11	8	11	16	28	8	8	20	9	2	1	8	18	30	26	43	27	45
16S_OTU00973	Bacteria	Proteobacteria	Alphaproteobacteria	Caulobacterales	Caulobacteraceae	Asticcacaulis	22.2922	0.263182	0.0001	0.000507407	-0.282906	0.282906	0.953131	0.990393	198	0.000161266	13	19	26	17	13	9	15	8	8	6	8	8	6	7	12	3	3	3	7	0	2	1	0	1	0	1	0	0	1	0	0	1	0
16S_OTU00974	Bacteria	Proteobacteria	Deltaproteobacteria	Myxococcales	bacteriap25	unclassified	26.5194	0.297416	0.0001	0.000507407	-0.229916	0.229916	1.13702	0.808744	167	0.000136017	17	10	27	4	3	2	5	2	16	0	0	2	6	3	1	1	0	0	5	4	6	4	3	8	5	7	6	1	0	0	2	3	4
16S_OTU00976	Bacteria	Planctomycetes	Planctomycetacia	Pirellulales	Pirellulaceae	Blastopirellula	37.2837	0.260373	0.0001	0.000507407	0.102894	-0.102894	1.07178	0.942178	431	0.000351038	0	0	0	0	0	0	1	0	0	0	7	1	0	0	0	3	0	4	22	12	21	0	6	7	13	6	13	7	13	29	42	27	44
16S_OTU00980	Bacteria	Actinobacteria	Actinobacteria	Propionibacteriales	Nocardioidaceae	Nocardioides	45.9669	0.281972	0.0001	0.000507407	-0.0880955	0.0880955	1.01819	1.00284	266	0.00021665	16	14	16	36	27	26	21	28	16	4	5	8	5	9	2	13	4	11	0	0	1	0	0	0	0	0	2	0	2	0	0	0	0
16S_OTU00984	Bacteria	Acidobacteria	Acidobacteriia	Solibacterales	Solibacteraceae_(Subgroup_3)	Candidatus_Solibacter	14.6493	0.160301	0.0001	0.000507407	-0.275446	0.275446	1.17911	0.712645	4632	0.00377264	279	357	495	220	242	127	223	144	198	228	118	141	193	138	207	116	92	81	60	93	63	58	72	66	58	80	60	46	52	45	61	55	49
16S_OTU01002	Bacteria	Proteobacteria	Gammaproteobacteria	Betaproteobacteriales	SC-I-84	unclassified	52.4042	0.349348	0.0001	0.000507407	0.56313	-0.56313	0.936784	0.713948	280	0.000228052	10	11	12	7	3	5	4	5	11	5	5	11	4	7	4	5	6	6	11	10	17	14	13	21	17	12	16	4	12	5	1	1	3
16S_OTU01005	Bacteria	Proteobacteria	Gammaproteobacteria	Betaproteobacteriales	SC-I-84	unclassified	20.4385	0.135278	0.0001	0.000507407	0.429664	-0.429664	0.936594	0.889198	616	0.000501715	33	33	22	18	23	18	13	15	10	32	38	45	51	39	41	26	28	29	5	1	18	0	0	2	25	15	9	6	8	12	0	0	0
16S_OTU01009	Bacteria	Chloroflexi	Anaerolineae	Ardenticatenales	unclassified	unclassified	27.0386	0.251841	0.0001	0.000507407	-0.107536	0.107536	0.997689	1.01929	300	0.000244342	0	0	0	0	0	0	0	0	0	0	1	1	0	1	0	2	4	2	21	11	17	7	13	8	7	2	11	5	11	19	27	30	21
16S_OTU01025	Bacteria	Planctomycetes	Planctomycetacia	Isosphaerales	Isosphaeraceae	Aquisphaera	12.8061	0.182883	0.0001	0.000507407	0.434321	-0.434321	1.12806	0.621966	218	0.000177555	14	17	15	21	33	13	14	10	6	7	6	7	14	4	6	5	1	6	2	2	1	3	1	0	1	1	1	4	0	0	0	0	1
16S_OTU01047	Bacteria	Planctomycetes	Planctomycetacia	Pirellulales	Pirellulaceae	Pirellula	30.7317	0.234758	0.0001	0.000507407	0.298132	-0.298132	1.01648	0.915084	147	0.000119728	2	0	1	7	2	3	3	6	5	1	0	1	0	1	1	2	1	5	11	12	1	22	19	16	0	7	5	0	3	0	3	1	2
16S_OTU01051	Bacteria	Proteobacteria	Gammaproteobacteria	Salinisphaerales	Solimonadaceae	Polycyclovorans	19.5462	0.242373	0.0001	0.000507407	-0.495588	0.495588	0.623074	1.07261	155	0.000126243	8	5	3	8	22	8	9	20	28	1	0	2	4	5	1	0	2	1	1	1	1	0	0	2	5	3	5	0	3	2	0	2	2
16S_OTU01059	Bacteria	Acidobacteria	Subgroup_25	unclassified	unclassified	unclassified	67.6866	0.369395	0.0001	0.000507407	0.273834	-0.273834	1.00608	0.942254	115	9.36644e-05	0	0	0	0	0	0	0	0	0	0	1	0	0	0	0	0	0	0	5	1	4	0	2	1	0	0	0	5	8	8	11	20	10
16S_OTU01060	Bacteria	Planctomycetes	Planctomycetacia	Pirellulales	Pirellulaceae	unclassified	26.6007	0.228108	0.0001	0.000507407	0.514795	-0.514795	0.77109	0.950284	264	0.000215021	5	4	2	7	5	8	16	17	8	3	5	0	2	4	1	3	4	9	21	20	24	12	6	20	5	3	6	5	16	8	2	2	6
16S_OTU01078	Bacteria	Planctomycetes	Planctomycetacia	Pirellulales	Pirellulaceae	Pirellula	34.082	0.200373	0.0001	0.000507407	-0.295319	0.295319	1.27974	0.486215	131	0.000106696	0	0	0	0	0	0	0	0	0	0	0	0	0	0	0	0	0	0	2	2	2	2	4	3	1	0	0	0	1	4	22	20	6
16S_OTU01083	Bacteria	Verrucomicrobia	Verrucomicrobiae	Verrucomicrobiales	Rubritaleaceae	Luteolibacter	29.7457	0.242096	0.0001	0.000507407	-0.448693	0.448693	0.647463	1.10149	563	0.000458548	3	3	3	6	5	2	19	16	16	2	5	4	2	3	5	5	1	12	37	26	36	19	22	21	49	40	42	8	27	12	21	12	22
16S_OTU01087	Bacteria	Planctomycetes	Planctomycetacia	Pirellulales	Pirellulaceae	Pirellula	41.7759	0.406711	0.0001	0.000507407	0.61667	-0.61667	0.862052	0.714414	295	0.000240269	9	6	5	12	7	13	18	13	18	1	3	4	1	2	3	5	8	11	9	11	11	12	13	17	11	15	6	2	10	3	9	7	9
16S_OTU01094	Bacteria	Firmicutes	Clostridia	Clostridiales	Clostridiaceae_1	Clostridium_sensu_stricto_1	91.6926	0.46089	0.0001	0.000507407	-0.38749	0.38749	0.934683	0.931252	206	0.000167781	17	20	24	12	8	12	10	9	8	2	0	0	3	1	3	1	1	1	24	8	16	1	0	3	6	3	3	2	0	2	0	0	1
16S_OTU01109	Bacteria	Chloroflexi	Ktedonobacteria	C0119	unclassified	unclassified	20.5805	0.171385	0.0001	0.000507407	-0.20725	0.20725	1.15292	0.799152	167	0.000136017	16	8	6	6	10	4	38	26	19	2	4	5	2	3	2	2	6	4	0	0	0	2	0	0	0	0	1	0	0	1	0	0	0
16S_OTU01110	Bacteria	Planctomycetes	Planctomycetacia	Planctomycetales	unclassified	unclassified	89.172	0.240699	0.0001	0.000507407	-0.388314	0.388314	0.585562	1.18179	323	0.000263075	0	0	0	0	0	0	0	1	0	0	0	0	0	1	0	0	0	0	25	24	12	10	17	28	49	44	47	1	3	0	13	7	15
16S_OTU01119	Bacteria	Planctomycetes	Phycisphaerae	Tepidisphaerales	CPla-3_termite_group	unclassified	56.9671	0.440098	0.0001	0.000507407	0.0477254	-0.0477254	1.17408	0.821903	379	0.000308685	28	42	41	30	45	20	26	12	20	11	9	5	7	11	6	9	5	6	5	2	0	13	7	9	2	1	2	2	1	0	1	0	1
16S_OTU01127	Bacteria	Planctomycetes	Planctomycetacia	Planctomycetales	Schlesneriaceae	Schlesneria	52.8424	0.513738	0.0001	0.000507407	0.620304	-0.620304	0.811973	0.764658	303	0.000246785	2	1	1	2	0	3	2	2	1	1	10	1	5	3	1	18	4	20	8	4	8	3	10	13	5	10	5	17	19	13	21	13	19
16S_OTU01135	Bacteria	Patescibacteria	Saccharimonadia	Saccharimonadales	unclassified	unclassified	41.5959	0.245149	0.0001	0.000507407	0.161912	-0.161912	0.948079	1.05093	256	0.000208505	60	36	44	14	23	10	16	18	10	9	1	0	2	3	5	2	0	3	0	0	0	0	0	0	0	0	0	0	0	0	0	0	0
16S_OTU01140	Bacteria	Proteobacteria	Alphaproteobacteria	Tistrellales	Geminicoccaceae	unclassified	28.5504	0.21854	0.0001	0.000507407	-0.519586	0.519586	0.529528	1.09851	87	7.08591e-05	0	0	0	0	0	0	0	0	0	0	0	0	0	0	0	0	0	0	3	1	0	1	3	5	0	0	2	2	0	4	13	13	6
16S_OTU01142	Bacteria	Acidobacteria	Subgroup_6	unclassified	unclassified	unclassified	36.574	0.418762	0.0001	0.000507407	0.372213	-0.372213	1.01136	0.861731	327	0.000266333	2	1	1	8	2	3	4	4	6	1	18	6	3	1	2	9	18	21	5	1	12	1	4	4	8	14	10	16	13	21	20	28	18
16S_OTU01144	Bacteria	Acidobacteria	Subgroup_22	unclassified	unclassified	unclassified	20.6951	0.194909	0.0001	0.000507407	0.0617919	-0.0617919	1.03693	0.987684	87	7.08591e-05	0	0	0	0	0	0	0	0	0	0	1	0	0	0	0	0	0	0	5	1	3	0	6	1	2	1	0	0	0	6	14	13	10
16S_OTU01164	Bacteria	Chloroflexi	Chloroflexia	Chloroflexales	Roseiflexaceae	unclassified	30.4533	0.267214	0.0001	0.000507407	-0.159016	0.159016	0.741816	1.20623	75	6.10855e-05	0	0	0	0	0	0	0	0	0	0	0	0	0	0	0	0	0	1	4	0	0	1	0	0	0	0	0	1	0	6	13	10	9
16S_OTU01180	Bacteria	Proteobacteria	Deltaproteobacteria	Myxococcales	Haliangiaceae	Haliangium	24.8755	0.179221	0.0001	0.000507407	-0.106393	0.106393	1.03106	0.985788	143	0.00011647	0	0	0	0	0	0	0	0	0	0	1	0	0	0	0	0	0	0	19	22	16	12	15	15	11	0	1	0	0	0	7	3	1
16S_OTU01188	Bacteria	Armatimonadetes	Fimbriimonadia	Fimbriimonadales	Fimbriimonadaceae	unclassified	10.3155	0.147369	0.0001	0.000507407	0.21434	-0.21434	0.986976	0.993687	136	0.000110768	6	5	7	39	15	9	10	4	3	4	4	3	4	0	0	2	0	2	0	2	0	3	5	3	0	0	0	1	2	0	1	0	1
16S_OTU01189	Bacteria	Gemmatimonadetes	Gemmatimonadetes	Gemmatimonadales	Gemmatimonadaceae	Gemmatimonas	29.5803	0.416599	0.0001	0.000507407	-0.392954	0.392954	0.697347	1.11604	226	0.000184071	4	6	9	8	2	15	15	11	12	0	4	3	2	1	1	4	0	1	12	6	13	6	4	9	28	13	11	0	0	3	4	2	6
16S_OTU01196	Bacteria	Acidobacteria	Subgroup_6	unclassified	unclassified	unclassified	33.7428	0.237154	0.0001	0.000507407	-0.460144	0.460144	0.731515	1.03698	120	9.77367e-05	0	0	0	0	0	0	0	0	0	0	0	0	0	0	0	0	0	0	0	4	1	2	5	3	0	0	3	2	0	7	20	9	22
16S_OTU01203	Bacteria	Planctomycetes	Phycisphaerae	Tepidisphaerales	WD2101_soil_group	unclassified	31.5806	0.285727	0.0001	0.000507407	-0.060607	0.060607	1.11109	0.903612	329	0.000267962	14	16	1	34	22	18	26	31	43	3	3	17	6	7	2	3	6	4	2	5	2	8	6	12	6	4	2	4	0	5	1	7	3
16S_OTU01210	Bacteria	Proteobacteria	Gammaproteobacteria	Betaproteobacteriales	Burkholderiaceae	unclassified	47.4814	0.239864	0.0001	0.000507407	0.00648094	-0.00648094	1.01431	1.01485	94	7.65604e-05	0	0	0	0	0	0	0	0	0	0	0	0	0	0	0	0	0	0	1	6	4	0	2	2	0	0	0	2	0	5	16	10	16
16S_OTU01216	Bacteria	Chloroflexi	Anaerolineae	RBG-13-54-9	unclassified	unclassified	17.4745	0.300715	0.0001	0.000507407	-0.312744	0.312744	0.935507	0.988193	83	6.76012e-05	1	1	0	0	0	0	10	0	0	0	2	1	0	1	0	0	0	0	4	9	7	10	3	14	12	1	5	0	2	0	0	0	0
16S_OTU01237	Bacteria	Bacteroidetes	Bacteroidia	Chitinophagales	Chitinophagaceae	Flavisolibacter	34.8087	0.412708	0.0001	0.000507407	0.152193	-0.152193	1.08754	0.909415	307	0.000250043	2	2	5	31	16	18	12	13	14	4	2	0	2	0	1	0	0	5	12	18	5	28	15	20	9	24	9	1	18	1	3	3	3
16S_OTU01248	Bacteria	Patescibacteria	Saccharimonadia	Saccharimonadales	unclassified	unclassified	32.7455	0.301698	0.0001	0.000507407	0.410716	-0.410716	0.977589	0.863668	182	0.000148234	4	0	7	21	8	14	16	5	10	0	2	2	1	0	1	2	2	4	4	2	3	3	4	4	12	14	15	1	2	4	1	2	3
16S_OTU01270	Bacteria	Proteobacteria	Gammaproteobacteria	Betaproteobacteriales	Rhodocyclaceae	unclassified	16.6544	0.174414	0.0001	0.000507407	0.261902	-0.261902	1.09987	0.838964	82	6.67868e-05	2	6	5	0	0	0	1	1	0	1	0	1	0	0	1	0	0	0	3	10	2	7	9	20	0	2	1	1	3	0	0	1	3
16S_OTU01272	Bacteria	Bacteroidetes	Bacteroidia	Sphingobacteriales	AKYH767	unclassified	24.8357	0.262922	0.0001	0.000507407	0.0798759	-0.0798759	0.921275	1.09388	434	0.000353481	9	19	22	18	17	14	30	25	21	6	12	11	9	7	11	16	6	14	10	15	13	10	9	11	12	10	11	14	13	12	6	4	5
16S_OTU01281	Bacteria	Proteobacteria	Deltaproteobacteria	Myxococcales	Sandaracinaceae	unclassified	31.7177	0.211873	0.0001	0.000507407	0.0864143	-0.0864143	0.751605	1.21577	94	7.65604e-05	2	2	2	0	1	0	1	0	0	11	14	10	0	5	4	6	2	6	0	0	1	0	0	0	2	7	4	1	3	3	1	0	1
16S_OTU01287	Bacteria	Verrucomicrobia	Verrucomicrobiae	Pedosphaerales	Pedosphaeraceae	unclassified	20.2123	0.307878	0.0001	0.000507407	-0.470125	0.470125	0.963411	0.814018	242	0.000197102	12	11	10	12	6	9	17	5	16	9	9	5	5	6	4	4	1	1	7	13	6	12	5	21	5	3	3	3	9	3	2	1	3
16S_OTU01289	Bacteria	Planctomycetes	Phycisphaerae	CCM11a	unclassified	unclassified	25.691	0.235539	0.0001	0.000507407	-0.495132	0.495132	0.799425	0.948995	73	5.94565e-05	0	0	0	0	0	0	0	0	0	0	0	0	0	0	0	0	0	0	5	1	0	1	1	2	0	0	0	1	3	6	8	10	2
16S_OTU01290	Bacteria	Verrucomicrobia	Verrucomicrobiae	Verrucomicrobiales	unclassified	unclassified	29.3506	0.181726	0.0001	0.000507407	0.491576	-0.491576	0.75259	0.990308	93	7.5746e-05	0	0	0	0	0	0	0	0	0	0	0	0	0	0	0	0	0	0	7	0	0	0	1	5	0	2	1	0	0	2	12	8	14
16S_OTU01301	Bacteria	Armatimonadetes	Fimbriimonadia	Fimbriimonadales	Fimbriimonadaceae	unclassified	38.0892	0.183515	0.0001	0.000507407	-0.781078	0.781078	0.401526	0.778241	52	4.23526e-05	0	3	0	9	6	7	7	5	5	0	2	1	1	1	1	1	2	1	0	0	0	0	0	0	0	0	0	0	0	0	0	0	0
16S_OTU01304	Bacteria	Patescibacteria	Parcubacteria	unclassified	unclassified	unclassified	57.8192	0.347624	0.0001	0.000507407	-0.486753	0.486753	0.666783	1.05475	80	6.51578e-05	0	0	0	0	0	0	0	0	0	0	0	0	0	0	0	0	0	0	3	0	2	0	1	0	4	4	2	5	2	7	9	10	7
16S_OTU01309	Bacteria	Bacteroidetes	Bacteroidia	Chitinophagales	37-13	unclassified	29.0459	0.335248	0.0001	0.000507407	-0.0596774	0.0596774	0.993656	1.03147	165	0.000134388	8	3	14	12	16	12	9	11	18	4	3	3	1	5	3	6	6	7	2	3	3	2	1	3	1	2	1	1	2	0	2	0	0
16S_OTU01331	Bacteria	Patescibacteria	Saccharimonadia	Saccharimonadales	unclassified	unclassified	17.7013	0.303506	0.0001	0.000507407	0.508451	-0.508451	1.08738	0.573564	142	0.000115655	11	14	15	12	10	4	10	9	3	0	0	1	1	0	0	1	0	0	3	4	4	28	5	6	0	0	0	0	1	0	0	0	0
16S_OTU01335	Bacteria	Planctomycetes	Phycisphaerae	Phycisphaerales	Phycisphaeraceae	AKYG587	35.4741	0.20984	0.0001	0.000507407	-0.277588	0.277588	0.929706	1.01553	109	8.87775e-05	0	0	0	0	0	0	0	0	0	0	0	0	0	0	0	1	1	2	0	1	0	0	0	1	0	0	0	1	0	3	19	9	6
16S_OTU01338	Bacteria	Armatimonadetes	Fimbriimonadia	Fimbriimonadales	Fimbriimonadaceae	unclassified	39.0005	0.410113	0.0001	0.000507407	0.067329	-0.067329	0.828662	1.16728	277	0.000225609	14	24	32	19	20	18	36	26	16	12	4	7	7	5	5	5	5	6	2	3	1	2	1	3	0	0	1	0	2	1	0	0	0
16S_OTU01346	Bacteria	Patescibacteria	Parcubacteria	Candidatus_Adlerbacteria	unclassified	unclassified	19.1143	0.178208	0.0001	0.000507407	0.271322	-0.271322	1.14459	0.769964	131	0.000106696	6	1	0	18	10	7	18	18	47	0	1	1	0	0	0	0	0	1	0	0	1	0	0	0	0	0	0	0	0	1	0	1	0
16S_OTU01350	Bacteria	Patescibacteria	Parcubacteria	unclassified	unclassified	unclassified	38.8044	0.263498	0.0001	0.000507407	0.405347	-0.405347	0.97098	0.8764	74	6.0271e-05	5	3	1	13	10	7	8	5	15	0	0	0	2	1	4	0	0	0	0	0	0	0	0	0	0	0	0	0	0	0	0	0	0
16S_OTU01351	Bacteria	Proteobacteria	Deltaproteobacteria	Desulfarculales	Desulfarculaceae	unclassified	19.6432	0.315917	0.0001	0.000507407	-0.569409	0.569409	0.725934	0.919372	175	0.000142533	2	5	5	3	0	2	0	0	0	4	15	8	5	6	5	10	2	6	9	3	4	2	5	5	2	7	4	7	13	9	5	3	7
16S_OTU01359	Bacteria	Chloroflexi	Anaerolineae	SBR1031	A4b	unclassified	24.5579	0.0992314	0.0001	0.000507407	0.585391	-0.585391	0.972579	0.62228	72	5.8642e-05	11	14	21	2	1	1	6	1	2	3	4	3	1	2	0	0	0	0	0	0	0	0	0	0	0	0	0	0	0	0	0	0	0
16S_OTU01361	Bacteria	Planctomycetes	Phycisphaerae	Phycisphaerales	Phycisphaeraceae	CL500-3	64.3753	0.346716	0.0001	0.000507407	0.227504	-0.227504	1.07823	0.886924	83	6.76012e-05	0	0	0	0	0	1	0	0	0	0	0	0	0	0	0	0	0	0	0	0	2	0	0	0	0	1	1	3	4	7	15	13	8
16S_OTU01365	Bacteria	Patescibacteria	Parcubacteria	Candidatus_Adlerbacteria	unclassified	unclassified	13.1817	0.169571	0.0001	0.000507407	-0.240839	0.240839	1.03681	0.927907	82	6.67868e-05	8	4	5	14	27	6	6	2	4	1	0	1	2	0	0	1	1	0	0	0	0	0	0	0	0	0	0	0	0	0	0	0	0
16S_OTU01369	Bacteria	Bacteroidetes	Bacteroidia	Sphingobacteriales	Sphingobacteriaceae	Pedobacter	17.7562	0.32646	0.0001	0.000507407	-0.0667168	0.0667168	0.943259	1.07688	168	0.000136831	3	1	0	4	3	18	10	8	3	0	0	0	0	0	1	0	0	0	13	9	10	9	5	11	7	8	7	3	3	3	6	5	11
16S_OTU01385	Bacteria	Acidobacteria	Subgroup_6	unclassified	unclassified	unclassified	27.7242	0.215694	0.0001	0.000507407	-0.442665	0.442665	0.470884	1.19253	70	5.70131e-05	0	0	0	0	0	0	0	0	0	0	0	0	0	0	0	0	0	0	3	3	0	0	1	1	0	0	0	0	0	4	16	5	6
16S_OTU01392	Bacteria	Chloroflexi	Chloroflexia	Thermomicrobiales	JG30-KF-CM45	unclassified	26.1785	0.442326	0.0001	0.000507407	-0.216416	0.216416	1.05353	0.921795	263	0.000214206	19	14	19	12	10	13	10	11	14	6	7	4	8	2	10	4	8	6	9	5	8	11	7	7	9	5	3	3	12	0	3	1	1
16S_OTU01398	Bacteria	Planctomycetes	OM190	unclassified	unclassified	unclassified	34.7373	0.462118	0.0001	0.000507407	0.36907	-0.36907	0.895393	0.984198	268	0.000218279	6	8	5	12	12	9	6	3	8	11	5	17	21	11	22	19	10	12	2	0	1	0	0	0	2	1	1	18	6	8	6	7	4
16S_OTU01416	Bacteria	Chloroflexi	Chloroflexia	Chloroflexales	Herpetosiphonaceae	Herpetosiphon	126.806	0.456369	0.0001	0.000507407	0.085863	-0.085863	0.820625	1.17038	122	9.93657e-05	3	0	1	1	1	1	2	2	3	1	0	0	1	1	2	0	0	0	13	8	8	14	12	13	7	11	8	3	3	0	1	0	1
16S_OTU01420	Bacteria	Chloroflexi	OLB14	unclassified	unclassified	unclassified	26.6642	0.326436	0.0001	0.000507407	0.548551	-0.548551	1.04713	0.570191	87	7.08591e-05	1	5	4	8	4	4	10	10	8	0	3	1	3	0	0	5	1	2	2	1	3	2	1	0	1	1	4	1	2	0	0	0	0
16S_OTU01423	Bacteria	Planctomycetes	Phycisphaerae	CCM11a	unclassified	unclassified	57.7686	0.266968	0.0001	0.000507407	0.216796	-0.216796	1.03958	0.937315	126	0.000102624	0	0	0	0	0	0	0	0	0	0	0	0	0	0	0	0	0	0	1	4	0	0	0	1	0	0	0	3	0	7	23	8	18
16S_OTU01429	Bacteria	Actinobacteria	Acidimicrobiia	Microtrichales	Ilumatobacteraceae	unclassified	43.1332	0.352932	0.0001	0.000507407	0.0688356	-0.0688356	1.30086	0.59711	287	0.000233754	4	7	6	1	1	5	3	0	7	8	8	14	3	5	1	10	2	5	14	7	5	8	7	6	4	7	8	8	13	8	18	12	12
16S_OTU01434	Bacteria	Gemmatimonadetes	Gemmatimonadetes	Gemmatimonadales	Gemmatimonadaceae	unclassified	28.4067	0.262637	0.0001	0.000507407	0.699507	-0.699507	0.807737	0.608439	394	0.000320902	19	17	31	15	15	18	19	11	14	8	8	7	4	3	7	7	3	10	15	25	8	14	22	29	1	1	1	10	9	8	3	7	10
16S_OTU01447	Bacteria	Chloroflexi	Dehalococcoidia	S085	unclassified	unclassified	24.1677	0.329414	0.0001	0.000507407	-0.184503	0.184503	0.902879	1.08238	156	0.000127058	15	17	10	6	14	7	8	7	5	1	1	1	8	1	12	1	1	0	0	5	3	1	2	6	5	7	4	0	0	1	0	2	1
16S_OTU01450	Bacteria	Planctomycetes	Phycisphaerae	Tepidisphaerales	WD2101_soil_group	unclassified	32.5774	0.456602	0.0001	0.000507407	-0.0352262	0.0352262	0.60683	1.29921	88	7.16736e-05	5	7	4	4	12	8	9	4	7	1	2	1	0	1	3	3	2	0	1	4	2	1	2	3	2	0	0	0	0	0	0	0	0
16S_OTU01452	Bacteria	Proteobacteria	Gammaproteobacteria	Betaproteobacteriales	Burkholderiaceae	unclassified	26.6852	0.218334	0.0001	0.000507407	-0.456883	0.456883	0.470235	1.18138	129	0.000105067	1	2	5	0	1	3	0	2	0	33	12	19	12	13	17	6	2	1	0	0	0	0	0	0	0	0	0	0	0	0	0	0	0
16S_OTU01455	Bacteria	Planctomycetes	Phycisphaerae	Tepidisphaerales	WD2101_soil_group	unclassified	57.3549	0.465517	0.0001	0.000507407	-0.496791	0.496791	0.699521	1.02316	216	0.000175926	10	7	10	19	20	12	20	12	18	2	3	0	3	3	4	4	6	4	4	4	9	4	7	3	5	7	1	6	0	3	1	4	1
16S_OTU01459	Bacteria	Gemmatimonadetes	Gemmatimonadetes	Gemmatimonadales	Gemmatimonadaceae	Gemmatimonas	34.3214	0.422668	0.0001	0.000507407	0.181172	-0.181172	0.90732	1.07985	126	0.000102624	3	4	1	3	0	1	3	3	5	0	2	3	0	2	2	0	0	0	10	11	5	9	10	8	7	11	6	6	1	1	3	1	0
16S_OTU01471	Bacteria	Chloroflexi	Anaerolineae	SBR1031	A4b	OLB13	57.0879	0.362337	0.0001	0.000507407	0.420481	-0.420481	1.18239	0.535136	70	5.70131e-05	0	0	0	0	0	0	1	0	0	1	1	0	0	0	0	1	0	0	8	7	4	6	5	13	5	7	6	0	1	0	2	0	2
16S_OTU01477	Bacteria	Chloroflexi	Anaerolineae	RBG-13-54-9	unclassified	unclassified	20.6659	0.300581	0.0001	0.000507407	-0.354532	0.354532	0.699097	1.14189	82	6.67868e-05	5	7	18	4	10	4	9	4	12	2	1	2	2	2	0	0	0	0	0	0	0	0	0	0	0	0	0	0	0	0	0	0	0
16S_OTU01494	Bacteria	Proteobacteria	Deltaproteobacteria	NB1-j	unclassified	unclassified	36.1796	0.267507	0.0001	0.000507407	0.173032	-0.173032	1.14694	0.824585	134	0.000109139	1	0	0	0	0	0	0	0	0	0	0	0	0	0	0	0	2	0	8	4	3	4	3	3	0	2	1	2	3	10	23	11	16
16S_OTU01503	Bacteria	Verrucomicrobia	Verrucomicrobiae	Pedosphaerales	Pedosphaeraceae	unclassified	54.6416	0.492886	0.0001	0.000507407	-0.586746	0.586746	0.45752	1.05852	194	0.000158008	1	0	1	2	2	0	1	2	0	0	13	10	1	4	4	7	2	4	1	0	6	0	0	0	1	3	0	5	4	16	25	13	13
16S_OTU01506	Bacteria	Chloroflexi	Anaerolineae	SBR1031	unclassified	unclassified	32.1756	0.375112	0.0001	0.000507407	0.276446	-0.276446	1.21382	0.650866	91	7.4117e-05	0	1	0	3	0	1	0	0	1	0	3	3	0	2	0	2	2	4	2	2	1	1	0	2	5	2	3	2	6	3	6	11	6
16S_OTU01509	Bacteria	Proteobacteria	Alphaproteobacteria	Micropepsales	Micropepsaceae	Micropepsis	20.3379	0.28455	0.0001	0.000507407	-0.234036	0.234036	0.689309	1.21148	81	6.59723e-05	5	6	8	12	14	3	13	6	4	5	1	2	0	0	0	1	0	0	0	0	0	1	0	0	0	0	0	0	0	0	0	0	0
16S_OTU01515	Bacteria	Deinococcus-Thermus	Deinococci	Deinococcales	Deinococcaceae	Deinococcus	20.2824	0.209891	0.0001	0.000507407	-0.475779	0.475779	0.640288	1.08143	73	5.94565e-05	1	0	1	25	13	5	5	7	7	0	0	0	0	0	0	0	0	0	0	0	0	3	0	6	0	0	0	0	0	0	0	0	0
16S_OTU01517	Bacteria	Halanaerobiaeota	Halanaerobiia	Halanaerobiales	Halanaerobiaceae	Halocella	19.9931	0.25974	0.0001	0.000507407	-0.364629	0.364629	0.840414	1.03488	76	6.18999e-05	1	2	2	14	8	7	18	7	3	0	1	0	0	1	0	0	1	0	0	1	2	2	1	0	1	2	0	0	0	0	0	0	0
16S_OTU01518	Bacteria	Proteobacteria	Gammaproteobacteria	Xanthomonadales	Rhodanobacteraceae	Rhodanobacter	79.8957	0.473462	0.0001	0.000507407	0.586134	-0.586134	1.08056	0.404589	249	0.000202804	31	19	26	32	12	10	31	25	28	7	1	0	1	0	1	1	0	1	3	2	0	5	6	4	0	0	0	2	0	1	0	0	0
16S_OTU01525	Bacteria	Armatimonadetes	Fimbriimonadia	Fimbriimonadales	Fimbriimonadaceae	unclassified	24.0907	0.256766	0.0001	0.000507407	-0.128517	0.128517	1.21252	0.744075	171	0.000139275	19	23	34	13	15	1	12	20	8	8	0	3	1	3	4	1	4	2	0	0	0	0	0	0	0	0	0	0	0	0	0	0	0
16S_OTU01528	Bacteria	Planctomycetes	Planctomycetacia	Pirellulales	Pirellulaceae	unclassified	26.1954	0.230942	0.0001	0.000507407	-0.275838	0.275838	0.865745	1.07153	145	0.000118099	0	0	0	0	0	0	0	0	0	0	0	0	0	0	0	0	1	0	2	10	2	1	2	7	0	0	1	1	6	7	23	8	18
16S_OTU01530	Bacteria	Proteobacteria	Gammaproteobacteria	Betaproteobacteriales	Nitrosomonadaceae	Ellin6067	38.4271	0.424192	0.0001	0.000507407	0.14416	-0.14416	0.659972	1.25668	127	0.000103438	0	0	0	0	0	0	0	2	0	0	2	0	1	3	4	7	3	8	1	5	1	0	0	2	0	2	1	3	5	12	6	12	7
16S_OTU01534	Bacteria	Actinobacteria	unclassified	unclassified	unclassified	unclassified	39.2633	0.249699	0.0001	0.000507407	-0.33019	0.33019	0.816497	1.07763	49	3.99092e-05	0	0	0	0	0	0	0	0	0	0	1	0	0	0	0	2	0	1	1	0	0	0	0	0	2	2	0	0	0	2	7	5	5
16S_OTU01540	Bacteria	Acidobacteria	Subgroup_25	unclassified	unclassified	unclassified	27.6715	0.231049	0.0001	0.000507407	0.216953	-0.216953	1.38062	0.230298	90	7.33026e-05	1	1	0	0	0	0	2	1	1	0	1	5	0	0	0	2	1	0	3	0	5	1	0	2	2	0	0	1	3	1	12	14	6
16S_OTU01541	Bacteria	Chloroflexi	Anaerolineae	SBR1031	A4b	unclassified	23.8566	0.317353	0.0001	0.000507407	-0.219833	0.219833	0.938245	1.03739	72	5.8642e-05	0	0	0	0	0	0	1	0	0	0	0	0	0	0	0	0	0	0	5	0	1	1	1	0	2	2	2	4	5	9	6	5	8
16S_OTU01546	Bacteria	Acidobacteria	Acidobacteriia	Acidobacteriales	unclassified	unclassified	118.494	0.270394	0.0001	0.000507407	0.292524	-0.292524	1.08756	0.833558	137	0.000111583	4	1	4	10	9	8	19	19	21	1	3	2	2	0	2	4	3	3	2	2	6	0	1	0	4	2	1	1	0	0	0	2	0
16S_OTU01553	Bacteria	Firmicutes	Bacilli	Bacillales	Bacillaceae	Bacillus	40.664	0.380176	0.0001	0.000507407	0.500752	-0.500752	0.910088	0.836396	108	8.79631e-05	8	5	4	13	6	5	12	9	17	1	0	3	2	0	3	2	2	1	2	1	1	3	2	1	0	2	0	0	0	0	0	0	1
16S_OTU01557	Bacteria	Patescibacteria	Parcubacteria	unclassified	unclassified	unclassified	14.2944	0.115221	0.0001	0.000507407	-0.283207	0.283207	0.933074	1.00913	109	8.87775e-05	1	0	2	7	7	6	10	20	28	4	0	0	3	2	3	2	4	4	0	0	1	0	1	2	0	0	1	0	1	0	0	0	0
16S_OTU01576	Bacteria	Acidobacteria	Blastocatellia_(Subgroup_4)	DS-100	unclassified	unclassified	35.0862	0.227365	0.0001	0.000507407	0.305053	-0.305053	1.02808	0.897117	107	8.71486e-05	9	11	17	1	2	2	14	12	13	4	0	5	4	1	2	2	2	0	0	0	1	0	0	0	5	0	0	0	0	0	0	0	0
16S_OTU01581	Bacteria	Patescibacteria	Saccharimonadia	Saccharimonadales	unclassified	unclassified	16.0039	0.228558	0.0001	0.000507407	-0.0275069	0.0275069	0.83225	1.16815	73	5.94565e-05	0	0	0	0	0	0	0	1	0	0	0	0	0	0	0	0	0	0	6	6	2	7	5	17	3	8	5	1	4	2	1	0	2
16S_OTU01611	Bacteria	Proteobacteria	Gammaproteobacteria	Betaproteobacteriales	Nitrosomonadaceae	MND1	20.6938	0.25644	0.0001	0.000507407	0.196415	-0.196415	1.13723	0.826949	77	6.27144e-05	0	0	0	0	0	0	0	0	0	0	0	0	0	0	0	0	0	1	5	1	0	0	0	1	4	5	5	4	7	5	4	10	4
16S_OTU01612	Bacteria	Proteobacteria	Gammaproteobacteria	Betaproteobacteriales	Burkholderiaceae	Herminiimonas	36.6641	0.239618	0.0001	0.000507407	-0.0214355	0.0214355	1.01297	1.01575	414	0.000337192	10	18	17	2	2	2	26	14	19	6	7	5	2	2	11	0	0	0	20	9	27	81	37	67	14	5	6	1	0	2	0	0	0
16S_OTU01614	Bacteria	Verrucomicrobia	Verrucomicrobiae	Chthoniobacterales	Chthoniobacteraceae	Candidatus_Udaeobacter	32.925	0.385594	0.0001	0.000507407	-0.00501251	0.00501251	0.607451	1.29991	375	0.000305427	8	3	3	13	9	10	5	23	7	7	28	20	36	19	30	26	18	34	0	2	3	1	0	0	8	4	3	17	11	8	5	7	2
16S_OTU01619	Bacteria	Patescibacteria	Parcubacteria	Candidatus_Nomurabacteria	unclassified	unclassified	21.6131	0.275466	0.0001	0.000507407	0.215338	-0.215338	1.13044	0.826271	194	0.000158008	13	15	7	13	13	9	23	11	40	0	0	0	10	2	6	3	3	6	4	1	2	0	0	0	4	0	6	1	0	0	0	0	0
16S_OTU01664	Bacteria	Fibrobacteres	Fibrobacteria	Fibrobacterales	Fibrobacteraceae	unclassified	14.5413	0.190068	0.0001	0.000507407	0.62178	-0.62178	0.998261	0.493553	88	7.16736e-05	2	2	1	3	8	3	3	3	4	9	5	3	8	12	8	4	4	6	0	0	0	0	0	0	0	0	0	0	0	0	0	0	0
16S_OTU01672	Bacteria	Chloroflexi	Anaerolineae	Caldilineales	Caldilineaceae	Litorilinea	58.9399	0.172904	0.0001	0.000507407	-0.290501	0.290501	0.842973	1.08144	179	0.000145791	2	2	0	2	1	2	5	2	4	0	1	0	0	3	0	2	4	3	8	16	11	18	21	26	5	4	2	4	6	3	5	7	5
16S_OTU01686	Bacteria	Entotheonellaeota	Entotheonellia	Entotheonellales	Entotheonellaceae	unclassified	193.559	0.427991	0.0001	0.000507407	0.312256	-0.312256	1.0328	0.886377	210	0.000171039	0	1	0	0	0	1	0	0	0	0	5	3	0	0	0	2	1	3	5	7	9	2	1	7	1	1	1	10	12	10	23	26	24
16S_OTU01692	Bacteria	Latescibacteria	unclassified	unclassified	unclassified	unclassified	42.4292	0.193116	0.0001	0.000507407	-0.240384	0.240384	1.05871	0.903099	79	6.43434e-05	0	0	0	0	0	0	0	0	0	0	0	0	0	0	0	0	0	0	2	0	0	0	2	6	0	1	1	1	1	3	12	5	5
16S_OTU01696	Bacteria	Acidobacteria	Subgroup_25	unclassified	unclassified	unclassified	55.207	0.337077	0.0001	0.000507407	-0.530257	0.530257	0.614775	1.04185	99	8.06328e-05	0	0	0	0	0	0	1	0	0	0	0	0	0	0	0	1	0	0	0	0	1	0	0	0	0	1	0	4	1	13	12	12	8
16S_OTU01698	Bacteria	Proteobacteria	Gammaproteobacteria	Betaproteobacteriales	Burkholderiaceae	unclassified	34.8642	0.0382795	0.0001	0.000507407	-0.0978921	0.0978921	0.82646	1.16426	60	4.88684e-05	0	0	0	0	0	0	0	0	0	0	0	0	0	0	0	0	0	0	0	0	2	0	0	0	14	15	12	2	1	0	1	2	1
16S_OTU01703	Bacteria	Proteobacteria	Gammaproteobacteria	R7C24	unclassified	unclassified	28.61	0.246638	0.0001	0.000507407	-0.221351	0.221351	0.917897	1.05477	81	6.59723e-05	1	3	6	9	15	13	18	4	10	0	0	0	0	0	0	0	0	0	0	0	0	0	0	0	0	0	0	1	0	0	0	0	0
16S_OTU01705	Bacteria	Proteobacteria	Gammaproteobacteria	Cellvibrionales	Halieaceae	OM60(NOR5)_clade	19.5247	0.122555	0.0001	0.000507407	-0.0601895	0.0601895	0.880285	1.12971	230	0.000187329	3	0	0	3	1	1	3	2	2	0	3	1	2	0	1	4	2	3	23	24	25	1	5	5	15	27	15	6	8	2	6	9	10
16S_OTU01709	Bacteria	Acidobacteria	Subgroup_6	unclassified	unclassified	unclassified	22.7945	0.322559	0.0001	0.000507407	0.256261	-0.256261	1.04724	0.90722	60	4.88684e-05	0	0	2	0	1	1	1	1	0	1	0	1	3	2	6	4	5	5	2	0	1	0	2	0	1	2	0	3	5	1	2	2	0
16S_OTU01717	Bacteria	Actinobacteria	Acidimicrobiia	unclassified	unclassified	unclassified	24.132	0.339843	0.0001	0.000507407	-0.285563	0.285563	0.883865	1.05115	316	0.000257373	2	4	1	10	8	9	7	13	14	4	13	8	12	4	13	14	13	15	7	0	8	0	2	4	6	8	11	13	10	4	17	21	10
16S_OTU01723	Bacteria	Proteobacteria	Gammaproteobacteria	Diplorickettsiales	Diplorickettsiaceae	Aquicella	66.3162	0.356408	0.0001	0.000507407	-0.40845	0.40845	1.01787	0.818214	74	6.0271e-05	8	10	12	1	2	2	11	5	12	0	0	0	0	0	0	0	0	0	3	0	0	1	1	0	3	1	0	2	0	0	0	0	0
16S_OTU01725	Bacteria	Planctomycetes	Planctomycetacia	Planctomycetales	Rubinisphaeraceae	SH-PL14	72.4405	0.295103	0.0001	0.000507407	0.0131491	-0.0131491	1.04432	0.983797	70	5.70131e-05	0	0	0	0	0	0	0	1	0	0	0	0	0	0	0	1	0	0	0	0	1	0	0	0	0	0	0	1	1	4	11	8	12
16S_OTU01734	Bacteria	Firmicutes	Bacilli	Bacillales	Bacillaceae	Geobacillus	40.6358	0.293254	0.0001	0.000507407	-0.154608	0.154608	1.0176	0.986254	52	4.23526e-05	4	1	1	0	0	0	0	0	0	3	6	7	4	2	2	7	4	8	0	0	0	1	0	0	0	1	0	0	0	0	0	1	0
16S_OTU01738	Bacteria	Proteobacteria	Alphaproteobacteria	Acetobacterales	Acetobacteraceae	unclassified	24.4276	0.239373	0.0001	0.000507407	0.568432	-0.568432	1.00411	0.605259	62	5.04973e-05	5	1	0	2	8	10	11	8	12	3	0	1	0	0	0	0	0	0	0	0	0	0	0	1	0	0	0	0	0	0	0	0	0
16S_OTU01744	Bacteria	Proteobacteria	Deltaproteobacteria	Myxococcales	BIrii41	unclassified	35.8261	0.176543	0.0001	0.000507407	-0.644254	0.644254	0.570892	0.924093	60	4.88684e-05	0	0	0	0	0	0	0	0	0	0	0	0	0	0	0	0	0	0	5	4	0	0	3	2	1	1	0	1	1	1	6	7	7
16S_OTU01745	Bacteria	Proteobacteria	Gammaproteobacteria	Betaproteobacteriales	Nitrosomonadaceae	MND1	54.6622	0.428865	0.0001	0.000507407	-0.213171	0.213171	0.92863	1.04892	198	0.000161266	1	1	0	5	3	4	1	5	9	0	2	4	14	9	9	9	11	9	6	0	2	0	0	2	1	1	7	12	9	16	12	10	11
16S_OTU01760	Bacteria	Planctomycetes	Phycisphaerae	Tepidisphaerales	WD2101_soil_group	unclassified	18.4119	0.269025	0.0001	0.000507407	-0.058022	0.058022	0.901982	1.11271	518	0.000421897	21	24	12	21	19	17	17	8	12	12	10	14	18	16	21	17	9	11	11	9	7	9	3	11	5	5	6	25	17	9	13	22	29
16S_OTU01762	Bacteria	Bacteroidetes	Bacteroidia	Chitinophagales	Chitinophagaceae	Flavisolibacter	11.5961	0.15685	0.0001	0.000507407	0.428202	-0.428202	1.24198	0.357794	229	0.000186514	3	3	10	5	4	2	16	5	3	0	0	1	0	0	0	0	0	0	12	20	3	78	21	40	0	2	1	0	0	0	0	0	0
16S_OTU01774	Bacteria	Proteobacteria	Gammaproteobacteria	Betaproteobacteriales	SC-I-84	unclassified	20.3247	0.244664	0.0001	0.000507407	0.113986	-0.113986	0.694705	1.24447	131	0.000106696	1	0	0	0	0	1	0	0	0	6	3	20	9	11	15	3	5	3	1	9	0	0	0	0	0	0	0	9	28	7	0	0	0
16S_OTU01780	Bacteria	Bacteroidetes	Bacteroidia	Sphingobacteriales	AKYH767	unclassified	39.6638	0.326557	0.0001	0.000507407	-0.414581	0.414581	0.631456	1.13847	32	2.60631e-05	1	3	3	5	5	3	5	1	4	1	0	0	0	0	0	0	0	1	0	0	0	0	0	0	0	0	0	0	0	0	0	0	0
16S_OTU01793	Bacteria	Proteobacteria	Gammaproteobacteria	Betaproteobacteriales	Nitrosomonadaceae	mle1-7	35.6614	0.321591	0.0001	0.000507407	-0.283509	0.283509	0.818432	1.10398	108	8.79631e-05	0	0	0	2	1	2	3	1	3	8	5	13	14	6	12	7	9	6	0	0	4	1	0	0	2	1	2	2	1	0	1	0	0
16S_OTU01818	Bacteria	Latescibacteria	unclassified	unclassified	unclassified	unclassified	32.2192	0.340079	0.0001	0.000507407	-0.30564	0.30564	0.643214	1.20303	58	4.72394e-05	0	0	0	0	0	0	0	0	0	0	1	2	0	0	0	2	0	0	1	2	1	2	0	1	0	0	2	3	0	4	7	7	6
16S_OTU01822	Bacteria	Planctomycetes	Planctomycetacia	Pirellulales	Pirellulaceae	Pirellula	12.8741	0.155328	0.0001	0.000507407	0.783385	-0.783385	0.750365	0.442937	146	0.000118913	0	0	0	0	0	0	0	0	0	0	0	0	0	0	0	0	0	0	3	11	7	5	8	16	12	17	27	1	4	1	6	5	4
16S_OTU01824	Bacteria	Bacteroidetes	Bacteroidia	Chitinophagales	Chitinophagaceae	unclassified	27.0643	0.34115	0.0001	0.000507407	0.156858	-0.156858	0.959683	1.04198	345	0.000280993	21	27	33	22	26	14	18	16	35	6	12	8	6	7	13	12	11	11	0	5	1	7	4	12	0	0	1	3	2	2	2	2	0
16S_OTU01828	Bacteria	Bacteroidetes	Bacteroidia	Cytophagales	Microscillaceae	unclassified	23.1275	0.190434	0.0001	0.000507407	-0.0781823	0.0781823	0.946535	1.07236	109	8.87775e-05	1	0	3	4	2	1	2	2	4	9	3	16	5	2	3	14	12	23	1	0	0	0	1	1	0	0	0	0	0	0	0	0	0
16S_OTU01829	Bacteria	Patescibacteria	Parcubacteria	Candidatus_Azambacteria	unclassified	unclassified	24.6699	0.297013	0.0001	0.000507407	-0.543434	0.543434	0.544241	1.06641	74	6.0271e-05	0	0	0	0	0	0	0	0	0	0	0	0	0	0	0	0	0	0	2	1	0	0	0	0	2	0	0	1	7	6	14	7	6
16S_OTU01836	Bacteria	Planctomycetes	Phycisphaerae	Tepidisphaerales	WD2101_soil_group	unclassified	37.3094	0.415128	0.0001	0.000507407	-0.269609	0.269609	0.879581	1.06359	45	3.66513e-05	6	4	5	5	4	4	6	1	3	1	1	0	1	0	0	1	0	0	0	0	1	2	0	0	0	0	0	0	0	0	0	0	0
16S_OTU01865	Bacteria	Chloroflexi	Anaerolineae	SBR1031	A4b	unclassified	31.9948	0.207096	0.0001	0.000507407	-0.293904	0.293904	0.495073	1.27703	47	3.82802e-05	0	0	0	0	0	0	0	0	0	0	0	0	0	0	0	0	0	0	0	0	1	0	0	0	0	1	1	0	1	0	10	8	3
16S_OTU01875	Bacteria	Actinobacteria	Actinobacteria	Micrococcales	Demequinaceae	unclassified	26.4071	0.413323	0.0001	0.000507407	-0.396515	0.396515	0.918258	0.939511	72	5.8642e-05	5	3	9	4	6	6	12	4	1	0	0	0	0	0	0	0	0	1	3	0	2	0	0	1	3	7	2	0	0	0	0	1	0
16S_OTU01878	Bacteria	Proteobacteria	Deltaproteobacteria	Myxococcales	Haliangiaceae	Haliangium	32.944	0.382688	0.0001	0.000507407	0.186367	-0.186367	0.961008	1.03041	203	0.000165338	2	2	3	4	2	4	3	4	4	1	8	3	3	3	0	2	5	6	4	10	3	1	2	3	1	1	1	8	11	18	16	10	20
16S_OTU01885	Bacteria	Verrucomicrobia	Verrucomicrobiae	Pedosphaerales	Pedosphaeraceae	unclassified	31.109	0.404133	0.0001	0.000507407	-0.104966	0.104966	0.68529	1.25135	396	0.000322531	21	23	43	34	19	23	17	21	17	11	16	13	15	15	14	7	8	11	9	6	4	6	7	12	2	5	4	4	2	0	1	2	1
16S_OTU01887	Bacteria	Planctomycetes	Planctomycetacia	Gemmatales	Gemmataceae	unclassified	24.9758	0.302057	0.0001	0.000507407	-0.316624	0.316624	1.00395	0.915755	53	4.31671e-05	0	0	0	0	0	0	0	0	0	0	0	0	0	0	0	0	0	0	2	1	1	0	0	0	0	0	1	0	8	4	4	4	8
16S_OTU01926	Bacteria	Patescibacteria	Saccharimonadia	Saccharimonadales	unclassified	unclassified	43.7461	0.275927	0.0001	0.000507407	0.0533571	-0.0533571	0.918697	1.09945	30	2.44342e-05	0	0	0	0	0	0	0	0	0	0	0	0	0	0	0	0	0	0	4	2	2	0	2	3	6	4	5	0	0	0	0	1	0
16S_OTU01942	Bacteria	Planctomycetes	Planctomycetacia	Pirellulales	Pirellulaceae	unclassified	39.8314	0.219886	0.0001	0.000507407	0.348038	-0.348038	1.07717	0.801262	66	5.37552e-05	0	0	0	0	0	0	0	0	0	0	0	0	0	0	0	0	0	0	1	1	0	2	5	1	0	0	1	0	4	1	10	8	8
16S_OTU01949	Bacteria	Verrucomicrobia	Verrucomicrobiae	Chthoniobacterales	unclassified	unclassified	28.1707	0.355663	0.0001	0.000507407	-0.302869	0.302869	0.661174	1.19475	194	0.000158008	4	5	5	4	4	4	5	3	3	6	14	28	26	17	16	12	21	10	1	0	0	0	0	0	0	0	0	2	2	1	0	1	0
16S_OTU01964	Bacteria	Proteobacteria	Gammaproteobacteria	Betaproteobacteriales	Rhodocyclaceae	Georgfuchsia	25.1739	0.251541	0.0001	0.000507407	-0.139087	0.139087	0.768278	1.19482	72	5.8642e-05	0	0	0	0	0	0	1	0	0	0	5	8	19	7	11	0	1	2	0	1	0	0	0	0	0	0	1	0	4	4	2	2	0
16S_OTU01982	Bacteria	Planctomycetes	Planctomycetacia	Gemmatales	Gemmataceae	unclassified	27.4446	0.341143	0.0001	0.000507407	0.601277	-0.601277	1.10254	0.278625	74	6.0271e-05	0	1	1	1	2	2	3	1	3	3	3	9	5	5	8	5	3	4	1	0	0	2	1	0	1	1	0	2	2	1	1	1	1
16S_OTU01988	Bacteria	Chloroflexi	Anaerolineae	Anaerolineales	Anaerolineaceae	unclassified	32.7903	0.351113	0.0001	0.000507407	0.596659	-0.596659	0.963419	0.613807	89	7.24881e-05	0	0	0	2	0	1	0	0	2	0	2	4	0	0	0	2	4	1	2	2	3	1	2	2	1	2	1	4	3	3	8	9	5
16S_OTU01990	Bacteria	Firmicutes	Bacilli	Bacillales	Bacillaceae	Bacillus	18.8985	0.259739	0.0001	0.000507407	-0.110926	0.110926	1.03457	0.98104	399	0.000324975	18	29	44	23	20	13	27	20	15	2	10	7	13	4	14	0	2	7	10	7	16	4	2	5	9	13	4	8	10	3	5	4	10
16S_OTU01995	Bacteria	Planctomycetes	Planctomycetacia	Pirellulales	Pirellulaceae	Pirellula	31.5725	0.460728	0.0001	0.000507407	-0.116049	0.116049	1.20516	0.760193	60	4.88684e-05	0	0	0	1	0	1	0	0	0	0	1	1	2	2	4	3	2	0	0	2	1	0	1	0	2	1	3	6	4	2	3	5	4
16S_OTU02013	Bacteria	Patescibacteria	ABY1	Candidatus_Magasanikbacteria	unclassified	unclassified	25.3113	0.215683	0.0001	0.000507407	0.412606	-0.412606	1.231	0.427729	109	8.87775e-05	2	1	0	4	1	2	2	1	3	0	1	0	1	0	0	0	0	1	9	5	10	1	1	3	23	8	20	0	1	0	4	0	1
16S_OTU02024	Bacteria	Chlamydiae	Chlamydiae	Chlamydiales	cvE6	unclassified	43.3346	0.247828	0.0001	0.000507407	0.685348	-0.685348	0.881106	0.536483	57	4.6425e-05	2	0	6	8	4	3	11	8	9	2	1	2	0	0	0	0	1	0	0	0	0	0	0	0	0	0	0	0	0	0	0	0	0
16S_OTU02027	Bacteria	Proteobacteria	Deltaproteobacteria	Myxococcales	Phaselicystidaceae	Phaselicystis	24.2194	0.244836	0.0001	0.000507407	-0.419735	0.419735	0.734142	1.07088	39	3.17644e-05	0	0	1	4	0	0	0	0	2	2	3	6	5	5	6	1	3	1	0	0	0	0	0	0	0	0	0	0	0	0	0	0	0
16S_OTU02058	Bacteria	Planctomycetes	Planctomycetacia	Pirellulales	Pirellulaceae	unclassified	20.7827	0.256283	0.0001	0.000507407	0.400735	-0.400735	1.09238	0.724883	35	2.85065e-05	0	0	0	0	0	0	0	0	0	0	0	0	0	0	0	0	1	0	2	1	0	0	0	0	0	0	0	0	0	4	6	3	4
16S_OTU02059	Bacteria	Patescibacteria	Parcubacteria	Candidatus_Adlerbacteria	unclassified	unclassified	19.8427	0.203494	0.0001	0.000507407	-0.175591	0.175591	0.910665	1.07899	48	3.90947e-05	1	5	7	6	6	7	2	1	5	1	1	1	1	0	1	0	1	0	0	0	0	0	0	0	0	0	0	1	0	0	0	0	0
16S_OTU02062	Bacteria	Actinobacteria	Thermoleophilia	Solirubrobacterales	Solirubrobacteraceae	Conexibacter	54.3298	0.533245	0.0001	0.000507407	0.183394	-0.183394	0.757078	1.1893	235	0.000191401	21	12	13	20	20	13	21	22	16	8	5	4	3	6	7	3	7	3	4	2	3	6	2	1	1	5	3	0	2	1	0	0	1
16S_OTU02063	Bacteria	Proteobacteria	Alphaproteobacteria	Sphingomonadales	Sphingomonadaceae	unclassified	156.102	0.48611	0.0001	0.000507407	0.639206	-0.639206	0.775199	0.76984	617	0.00050253	60	42	71	58	54	41	63	37	57	17	4	8	9	4	10	1	1	2	6	3	5	12	6	8	2	4	1	1	3	2	4	4	5
16S_OTU02077	Bacteria	Patescibacteria	Parcubacteria	Candidatus_Kaiserbacteria	unclassified	unclassified	27.7314	0.338848	0.0001	0.000507407	-0.27591	0.27591	0.629495	1.2253	102	8.30762e-05	2	0	0	0	0	0	4	3	3	1	1	0	1	4	2	6	7	9	2	0	0	0	0	0	0	6	1	0	4	6	12	4	5
16S_OTU02098	Bacteria	Proteobacteria	Gammaproteobacteria	Betaproteobacteriales	Nitrosomonadaceae	unclassified	61.1846	0.167765	0.0001	0.000507407	-0.292951	0.292951	0.759979	1.13996	70	5.70131e-05	0	0	0	1	1	2	0	0	0	2	1	1	15	19	15	2	5	3	0	0	0	0	0	0	0	0	0	0	1	2	0	0	0
16S_OTU02116	Bacteria	Acidobacteria	Acidobacteriia	Acidobacteriales	unclassified	unclassified	38.5618	0.242807	0.0001	0.000507407	0.233162	-0.233162	1.3283	0.423452	120	9.77367e-05	17	22	26	4	8	4	18	5	5	2	0	0	4	1	4	0	0	0	0	0	0	0	0	0	0	0	0	0	0	0	0	0	0
16S_OTU02127	Bacteria	Acidobacteria	Subgroup_6	unclassified	unclassified	unclassified	39.3058	0.22524	0.0001	0.000507407	0.134527	-0.134527	1.20148	0.759575	45	3.66513e-05	0	0	0	0	0	0	0	0	0	0	0	0	0	0	0	0	0	0	0	1	0	0	2	0	0	0	0	0	1	4	7	9	11
16S_OTU02144	Bacteria	Planctomycetes	Phycisphaerae	Tepidisphaerales	WD2101_soil_group	unclassified	19.6666	0.208894	0.0001	0.000507407	0.463819	-0.463819	1.1139	0.602076	65	5.29407e-05	0	0	0	0	0	0	0	0	0	0	0	0	0	0	0	0	0	0	0	2	0	0	1	0	0	0	0	0	1	3	9	3	14
16S_OTU02153	Bacteria	Proteobacteria	Deltaproteobacteria	Myxococcales	Polyangiaceae	Pajaroellobacter	26.3636	0.160917	0.0001	0.000507407	0.338295	-0.338295	1.10185	0.776139	145	0.000118099	5	14	6	3	3	2	0	4	1	25	14	29	5	8	8	5	6	6	0	0	0	0	0	0	0	0	0	0	1	0	0	0	0
16S_OTU02154	Bacteria	Chloroflexi	Anaerolineae	SBR1031	A4b	unclassified	29.8126	0.244128	0.0001	0.000507407	0.0873765	-0.0873765	1.11173	0.898177	150	0.000122171	0	0	1	0	0	0	0	1	0	0	1	0	0	2	1	0	0	1	18	1	10	15	20	21	10	12	9	2	9	2	1	2	3
16S_OTU02167	Bacteria	Planctomycetes	Planctomycetacia	Planctomycetales	unclassified	unclassified	49.7376	0.365342	0.0001	0.000507407	0.542474	-0.542474	1.07035	0.538509	101	8.22618e-05	0	0	0	0	0	0	0	0	0	0	0	0	0	0	0	0	0	0	11	8	7	3	9	14	9	17	12	0	1	0	3	1	2
16S_OTU02179	Bacteria	Proteobacteria	Gammaproteobacteria	Betaproteobacteriales	unclassified	unclassified	34.3861	0.158758	0.0001	0.000507407	-0.573426	0.573426	0.560099	1.02411	44	3.58368e-05	0	0	0	0	0	0	0	0	0	0	0	0	0	0	0	0	0	0	1	1	5	1	0	0	0	0	0	0	0	0	8	5	4
16S_OTU02187	Bacteria	Patescibacteria	Parcubacteria	Candidatus_Nomurabacteria	unclassified	unclassified	26.5592	0.373002	0.0001	0.000507407	0.415509	-0.415509	1.15901	0.591535	180	0.000146605	4	7	8	2	8	5	2	5	6	5	7	15	14	18	10	11	6	4	0	0	3	0	1	0	0	2	1	7	8	5	2	4	3
16S_OTU02193	Bacteria	Proteobacteria	Deltaproteobacteria	MBNT15	unclassified	unclassified	27.3871	0.230522	0.0001	0.000507407	0.424774	-0.424774	1.18662	0.518326	50	4.07236e-05	0	0	0	3	0	1	0	0	0	0	1	0	0	0	0	1	1	1	2	3	5	3	0	4	7	10	5	0	1	1	0	0	1
16S_OTU02197	Bacteria	Planctomycetes	Phycisphaerae	Tepidisphaerales	WD2101_soil_group	unclassified	45.2732	0.376041	0.0001	0.000507407	-0.323626	0.323626	1.04786	0.859669	132	0.00010751	1	3	1	1	1	3	0	1	4	6	12	21	17	15	14	14	4	13	0	0	0	0	0	0	0	0	0	0	1	0	0	0	0
16S_OTU02210	Bacteria	Actinobacteria	Thermoleophilia	Solirubrobacterales	Solirubrobacteraceae	unclassified	33.2245	0.371695	0.0001	0.000507407	0.238117	-0.238117	1.0841	0.873777	99	8.06328e-05	1	1	1	7	1	0	1	1	2	6	7	12	2	5	4	10	7	6	1	1	1	1	1	0	1	1	1	0	1	0	0	4	3
16S_OTU02229	Bacteria	Proteobacteria	Gammaproteobacteria	Betaproteobacteriales	TRA3-20	unclassified	29.027	0.272905	0.0001	0.000507407	0.262295	-0.262295	0.859725	1.08352	386	0.000314387	4	6	5	9	9	5	20	6	22	6	11	24	9	8	11	29	20	25	10	5	15	4	5	6	5	5	4	15	16	18	8	8	6
16S_OTU02257	Bacteria	Firmicutes	Clostridia	Clostridiales	Clostridiaceae_1	Clostridium_sensu_stricto_1	32.826	0.338863	0.0001	0.000507407	0.1794	-0.1794	1.03237	0.961711	101	8.22618e-05	6	6	14	3	2	0	2	1	0	4	1	1	1	1	1	1	1	0	8	5	5	11	7	5	5	3	2	1	0	0	2	0	1
16S_OTU02291	Bacteria	Planctomycetes	Planctomycetacia	Gemmatales	Gemmataceae	Fimbriiglobus	41.0265	0.462654	0.0001	0.000507407	-0.498836	0.498836	0.734857	0.995922	146	0.000118913	1	3	8	1	5	1	2	1	1	4	3	5	9	2	4	3	1	7	4	2	2	1	0	1	0	0	1	1	8	9	8	10	8
16S_OTU02296	Bacteria	Acidobacteria	Subgroup_25	unclassified	unclassified	unclassified	26.5633	0.347143	0.0001	0.000507407	-0.126992	0.126992	1.16609	0.815415	37	3.01355e-05	0	0	0	0	0	0	0	0	0	0	1	0	0	0	0	0	0	1	0	0	0	0	0	0	0	1	0	1	4	3	6	7	1
16S_OTU02346	Bacteria	Patescibacteria	Parcubacteria	Candidatus_Moranbacteria	unclassified	unclassified	59.7073	0.357811	0.0001	0.000507407	0.00425947	-0.00425947	1.2237	0.749229	56	4.56105e-05	4	4	4	7	11	5	3	3	2	2	0	0	0	0	1	0	0	0	0	0	0	0	1	0	4	2	2	0	1	0	0	0	0
16S_OTU02355	Bacteria	Cyanobacteria	Oxyphotobacteria	Chloroplast	unclassified	unclassified	71.1509	0.606215	0.0001	0.000507407	0.00479943	-0.00479943	1.16075	0.843466	369	0.00030054	16	12	32	10	16	12	41	19	20	1	3	3	2	4	7	3	0	1	28	17	28	16	7	16	5	12	12	2	1	1	7	5	3
16S_OTU02361	Bacteria	Planctomycetes	Planctomycetacia	Planctomycetales	unclassified	unclassified	51.8936	0.149151	0.0001	0.000507407	0.484647	-0.484647	0.836612	0.928173	139	0.000113212	0	0	0	0	0	0	0	1	0	0	0	0	0	0	0	0	0	0	13	8	11	1	2	2	19	30	28	0	1	1	8	2	2
16S_OTU02368	Bacteria	Patescibacteria	Parcubacteria	Candidatus_Azambacteria	unclassified	unclassified	21.8655	0.237937	0.0001	0.000507407	0.419207	-0.419207	0.701727	1.09282	50	4.07236e-05	1	0	1	1	0	1	0	0	0	0	0	1	0	1	0	0	0	0	3	0	0	1	0	0	4	1	2	3	3	4	6	4	5
16S_OTU02374	Bacteria	Verrucomicrobia	Verrucomicrobiae	S-BQ2-57_soil_group	unclassified	unclassified	21.1947	0.322932	0.0001	0.000507407	0.249744	-0.249744	1.04353	0.915304	102	8.30762e-05	1	0	1	1	0	2	1	1	0	0	3	2	0	0	1	2	3	6	5	2	6	2	1	2	3	1	2	4	5	4	9	4	9
16S_OTU02392	Bacteria	Latescibacteria	unclassified	unclassified	unclassified	unclassified	19.9976	0.198998	0.0001	0.000507407	0.697411	-0.697411	0.873349	0.515849	75	6.10855e-05	0	0	0	0	0	0	0	0	0	0	2	1	0	0	0	0	0	0	2	1	3	0	1	0	1	1	2	2	0	2	11	16	10
16S_OTU02414	Bacteria	Patescibacteria	Saccharimonadia	Saccharimonadales	unclassified	unclassified	27.9805	0.392362	0.0001	0.000507407	-0.157539	0.157539	0.818229	1.15619	65	5.29407e-05	8	5	9	5	9	4	5	7	0	1	0	2	0	0	0	1	0	0	1	0	6	0	1	1	0	0	0	0	0	0	0	0	0
16S_OTU02447	Bacteria	Acidobacteria	Subgroup_6	unclassified	unclassified	unclassified	37.6104	0.250951	0.0001	0.000507407	0.0354603	-0.0354603	1.14639	0.861362	42	3.42079e-05	0	0	0	0	1	0	0	0	0	0	5	3	1	0	4	3	2	3	0	0	2	0	0	0	0	0	0	6	6	6	0	0	0
16S_OTU02455	Bacteria	Actinobacteria	Thermoleophilia	Solirubrobacterales	67-14	unclassified	48.7792	0.317709	0.0001	0.000507407	0.226969	-0.226969	1.10655	0.851639	191	0.000155564	12	5	7	16	22	16	25	21	15	3	4	3	4	6	7	3	5	5	3	1	0	0	1	1	0	2	3	0	1	0	0	0	0
16S_OTU02472	Bacteria	Proteobacteria	Deltaproteobacteria	Myxococcales	Haliangiaceae	Haliangium	35.6738	0.343002	0.0001	0.000507407	0.101187	-0.101187	0.958532	1.05752	57	4.6425e-05	0	0	2	0	0	0	1	0	0	4	3	2	2	2	0	12	6	6	1	0	0	0	0	0	0	0	1	3	1	0	1	2	1
16S_OTU02477	Bacteria	Actinobacteria	Actinobacteria	Micrococcales	Intrasporangiaceae	Intrasporangium	59.725	0.574191	0.0001	0.000507407	0.358176	-0.358176	1.01467	0.8704	350	0.000285065	21	22	26	13	12	10	17	15	8	6	7	6	4	8	5	6	1	1	6	19	8	23	16	14	11	16	14	6	6	3	2	4	4
16S_OTU02482	Bacteria	Proteobacteria	Gammaproteobacteria	Betaproteobacteriales	Burkholderiaceae	unclassified	47.1256	0.470544	0.0001	0.000507407	0.088571	-0.088571	0.845911	1.1518	108	8.79631e-05	5	9	9	9	4	7	10	7	6	2	1	1	3	1	0	2	1	0	0	1	0	2	4	3	5	3	3	1	1	1	1	3	0
16S_OTU02496	Bacteria	Chloroflexi	Chloroflexia	Kallotenuales	AKIW781	unclassified	20.8208	0.328521	0.0001	0.000507407	0.300383	-0.300383	1.06469	0.856841	101	8.22618e-05	12	8	6	11	4	2	8	9	11	1	3	2	3	3	3	3	3	3	0	0	0	0	1	1	2	0	2	0	0	0	0	0	0
16S_OTU02498	Bacteria	Acidobacteria	Thermoanaerobaculia	Thermoanaerobaculales	Thermoanaerobaculaceae	Subgroup_10	20.6727	0.20166	0.0001	0.000507407	0.024196	-0.024196	1.10153	0.918807	41	3.33934e-05	0	0	0	0	0	0	0	0	0	0	0	0	0	0	0	0	0	0	3	2	0	0	1	1	0	0	0	0	1	3	3	3	6
16S_OTU02537	Bacteria	Bacteroidetes	Bacteroidia	Sphingobacteriales	AKYH767	unclassified	28.4738	0.176081	0.0001	0.000507407	0.10054	-0.10054	1.07573	0.938204	59	4.80539e-05	0	0	0	1	0	0	2	0	1	0	1	0	1	0	0	1	1	4	2	0	1	0	1	1	1	0	0	0	1	0	5	5	2
16S_OTU02539	Bacteria	Verrucomicrobia	Verrucomicrobiae	Pedosphaerales	Pedosphaeraceae	unclassified	26.1428	0.238438	0.0001	0.000507407	-0.638392	0.638392	0.734006	0.81057	117	9.52933e-05	11	15	14	13	8	5	8	6	5	4	2	4	1	4	5	4	3	3	0	0	0	0	0	0	0	0	0	0	0	1	0	0	1
16S_OTU02542	Bacteria	Dependentiae	Babeliae	Babeliales	Vermiphilaceae	unclassified	23.1294	0.119291	0.0001	0.000507407	-0.0911555	0.0911555	0.489047	1.34241	54	4.39815e-05	0	0	0	0	0	0	0	0	0	0	0	1	1	1	1	19	19	9	0	0	0	0	0	0	0	0	0	1	1	0	0	1	0
16S_OTU02563	Bacteria	Verrucomicrobia	Verrucomicrobiae	Chthoniobacterales	Chthoniobacteraceae	Chthoniobacter	39.8729	0.55866	0.0001	0.000507407	0.563066	-0.563066	0.850179	0.81525	134	0.000109139	1	5	2	1	2	1	2	2	5	3	9	8	7	10	6	10	5	10	0	2	2	0	0	0	2	4	0	8	4	2	3	4	3
16S_OTU02571	Bacteria	Patescibacteria	Saccharimonadia	Saccharimonadales	unclassified	unclassified	70.3963	0.281671	0.0001	0.000507407	0.475453	-0.475453	0.969376	0.800268	35	2.85065e-05	1	2	3	7	8	5	2	4	1	0	0	0	0	0	0	0	0	0	0	0	2	0	0	0	0	0	0	0	0	0	0	0	0
16S_OTU02604	Bacteria	Acidobacteria	Subgroup_17	unclassified	unclassified	unclassified	29.2911	0.361661	0.0001	0.000507407	0.394887	-0.394887	1.09725	0.724328	275	0.00022398	2	0	0	0	0	0	1	0	0	0	10	5	0	0	0	0	2	0	7	14	15	3	10	11	10	15	12	15	13	17	22	23	20
16S_OTU02626	Bacteria	Patescibacteria	ABY1	Candidatus_Magasanikbacteria	unclassified	unclassified	11.2484	0.146629	0.0001	0.000507407	-0.158382	0.158382	0.558395	1.3015	19	1.5475e-05	1	2	1	1	1	0	6	2	3	0	0	1	0	1	0	0	0	0	0	0	0	0	0	0	0	0	0	0	0	0	0	0	0
16S_OTU02639	Bacteria	Patescibacteria	Parcubacteria	unclassified	unclassified	unclassified	23.8977	0.137476	0.0001	0.000507407	0.358082	-0.358082	1.29197	0.343663	66	5.37552e-05	1	0	0	1	0	0	1	1	4	0	0	0	0	1	0	1	0	0	1	1	2	0	0	1	2	1	3	0	0	3	4	7	5
16S_OTU02649	Bacteria	Proteobacteria	Deltaproteobacteria	Myxococcales	Haliangiaceae	Haliangium	31.5479	0.321643	0.0001	0.000507407	0.325049	-0.325049	1.03435	0.874762	113	9.20354e-05	3	5	6	5	2	8	3	5	9	0	0	0	2	1	0	2	0	0	4	3	5	3	0	0	10	8	9	1	2	1	4	2	2
16S_OTU02656	Bacteria	Planctomycetes	Planctomycetacia	Gemmatales	Gemmataceae	unclassified	46.9759	0.242845	0.0001	0.000507407	0.249236	-0.249236	1.24008	0.624076	59	4.80539e-05	0	0	0	3	0	1	0	2	0	1	1	4	5	7	5	8	12	10	0	0	0	0	0	0	0	0	0	0	0	0	0	0	0
16S_OTU02669	Bacteria	unclassified	unclassified	unclassified	unclassified	unclassified	66.7821	0.499564	0.0001	0.000507407	-0.196665	0.196665	0.852337	1.11823	149	0.000121356	12	8	13	3	4	5	14	12	9	0	2	1	0	1	1	1	2	0	5	5	5	5	5	15	2	1	4	2	2	3	1	0	2
16S_OTU02691	Bacteria	Planctomycetes	Phycisphaerae	Phycisphaerales	Phycisphaeraceae	unclassified	40.5178	0.309027	0.0001	0.000507407	-0.0180293	0.0180293	1.27976	0.648352	41	3.33934e-05	5	3	4	9	4	4	3	3	2	1	0	1	1	1	0	0	0	0	0	0	0	0	0	0	0	0	0	0	0	0	0	0	0
16S_OTU02696	Bacteria	Proteobacteria	Gammaproteobacteria	Xanthomonadales	Xanthomonadaceae	Lysobacter	38.7054	0.230716	0.0001	0.000507407	-0.633698	0.633698	0.747164	0.806336	41	3.33934e-05	1	2	2	9	11	4	5	4	2	0	0	0	0	0	0	0	0	1	0	0	0	0	0	0	0	0	0	0	0	0	0	0	0
16S_OTU02719	Bacteria	Bacteroidetes	Bacteroidia	Chitinophagales	Chitinophagaceae	Flavisolibacter	58.4953	0.439602	0.0001	0.000507407	0.229129	-0.229129	1.1814	0.742925	129	0.000105067	13	13	20	6	13	6	4	7	8	0	0	0	0	0	0	0	1	0	4	6	3	3	6	3	0	0	2	0	7	0	0	0	0
16S_OTU02720	Bacteria	unclassified	unclassified	unclassified	unclassified	unclassified	47.2154	0.310102	0.0001	0.000507407	0.0406594	-0.0406594	1.04489	0.981599	14	1.14026e-05	0	0	0	2	3	1	1	0	0	0	0	0	0	0	0	0	0	0	1	1	2	1	1	1	0	0	0	0	0	0	0	0	0
16S_OTU02725	Bacteria	Patescibacteria	Saccharimonadia	Saccharimonadales	unclassified	unclassified	39.6642	0.228563	0.0001	0.000507407	0.455892	-0.455892	0.915627	0.88336	47	3.82802e-05	2	2	4	4	0	1	1	0	0	0	0	0	0	0	0	0	0	0	0	1	1	7	8	6	1	3	1	0	1	1	0	0	0
16S_OTU02746	Bacteria	Proteobacteria	Deltaproteobacteria	Myxococcales	Haliangiaceae	Haliangium	25.287	0.403908	0.0001	0.000507407	0.252254	-0.252254	1.21817	0.663421	59	4.80539e-05	7	7	3	3	5	3	0	2	5	2	1	1	1	0	1	2	0	0	4	0	0	3	1	5	1	1	1	0	0	0	0	0	0
16S_OTU02752	Bacteria	Chloroflexi	JG30-KF-CM66	unclassified	unclassified	unclassified	17.6573	0.118851	0.0001	0.000507407	-0.541141	0.541141	0.679258	0.988591	34	2.76921e-05	0	0	2	1	0	1	0	2	2	0	1	1	2	2	2	5	4	8	0	0	0	0	0	0	1	0	0	0	0	0	0	0	0
16S_OTU02764	Bacteria	Acidobacteria	Subgroup_22	unclassified	unclassified	unclassified	25.9387	0.309278	0.0001	0.000507407	0.607595	-0.607595	0.882954	0.705295	176	0.000143347	1	1	0	2	6	2	2	2	4	2	7	6	11	14	11	6	9	5	7	2	10	4	2	3	2	3	3	4	0	4	10	3	6
16S_OTU02796	Bacteria	Verrucomicrobia	Verrucomicrobiae	Chthoniobacterales	Chthoniobacteraceae	Chthoniobacter	21.2187	0.323438	0.0001	0.000507407	0.0198477	-0.0198477	0.871626	1.13941	64	5.21263e-05	2	2	2	4	3	1	1	4	3	1	1	1	0	0	0	0	0	0	4	2	1	8	5	4	2	4	1	0	0	1	1	0	4
16S_OTU02798	Bacteria	Proteobacteria	Gammaproteobacteria	Betaproteobacteriales	SC-I-84	unclassified	93.9756	0.29815	0.0001	0.000507407	0.291553	-0.291553	0.979743	0.958604	152	0.0001238	13	11	3	16	9	5	28	25	29	0	0	0	2	2	0	0	3	0	0	1	0	0	2	1	0	0	1	0	0	0	0	0	1
16S_OTU02804	Bacteria	Bacteroidetes	Bacteroidia	Sphingobacteriales	Sphingobacteriaceae	Mucilaginibacter	38.2963	0.222265	0.0001	0.000507407	0.472831	-0.472831	1.0017	0.762883	54	4.39815e-05	0	0	1	1	0	1	0	0	0	6	10	14	4	2	2	3	4	4	0	0	0	2	0	0	0	0	0	0	0	0	0	0	0
16S_OTU02805	Bacteria	Firmicutes	Clostridia	Clostridiales	Heliobacteriaceae	Hydrogenispora	38.4565	0.394637	0.0001	0.000507407	0.0857553	-0.0857553	0.560337	1.31502	41	3.33934e-05	0	2	1	3	3	4	6	5	3	0	0	0	0	1	0	0	0	0	2	0	0	1	0	3	1	2	2	0	0	1	0	0	0
16S_OTU02815	Bacteria	Planctomycetes	Planctomycetacia	Gemmatales	Gemmataceae	unclassified	103.816	0.377355	0.0001	0.000507407	-0.0717486	0.0717486	0.977039	1.04562	49	3.99092e-05	0	0	0	1	0	1	1	1	0	1	3	2	2	1	0	7	5	5	0	1	0	0	0	0	0	0	0	4	5	4	0	1	1
16S_OTU02854	Bacteria	Planctomycetes	Planctomycetacia	Planctomycetales	unclassified	unclassified	25.6469	0.248587	0.0001	0.000507407	-0.163378	0.163378	0.876105	1.11119	727	0.000592122	17	25	18	18	18	20	24	25	30	11	35	53	37	31	36	41	32	43	13	8	15	9	7	7	10	7	14	36	34	24	8	10	5
16S_OTU02856	Bacteria	Patescibacteria	Parcubacteria	unclassified	unclassified	unclassified	16.7913	0.26302	0.0001	0.000507407	-0.140543	0.140543	1.0383	0.968988	74	6.0271e-05	3	7	6	2	14	5	11	5	13	1	0	1	1	2	1	0	2	0	0	0	0	0	0	0	0	0	0	0	0	0	0	0	0
16S_OTU02873	Bacteria	Verrucomicrobia	Verrucomicrobiae	Pedosphaerales	Pedosphaeraceae	unclassified	22.5035	0.391599	0.0001	0.000507407	-0.397404	0.397404	1.10071	0.716108	370	0.000301355	13	11	17	15	11	17	16	11	15	2	11	1	4	3	11	6	3	5	18	18	22	7	14	5	8	22	16	10	9	7	11	4	14
16S_OTU02912	Bacteria	Patescibacteria	Saccharimonadia	Saccharimonadales	unclassified	unclassified	28.1317	0.275028	0.0001	0.000507407	-0.424532	0.424532	0.553755	1.17069	58	4.72394e-05	7	3	4	9	14	5	3	1	1	2	0	0	0	0	0	0	0	0	1	0	3	2	0	0	0	0	2	0	1	0	0	0	0
16S_OTU02924	Bacteria	Actinobacteria	MB-A2-108	unclassified	unclassified	unclassified	23.5629	0.361114	0.0001	0.000507407	-0.218688	0.218688	0.666697	1.23007	106	8.63341e-05	0	0	0	1	2	0	0	0	0	0	0	4	1	1	0	2	4	3	7	5	4	2	3	2	5	4	3	5	5	5	7	6	6
16S_OTU02932	Bacteria	Verrucomicrobia	Verrucomicrobiae	Pedosphaerales	Pedosphaeraceae	unclassified	30.5582	0.330647	0.0001	0.000507407	-0.454733	0.454733	0.652426	1.09328	69	5.61986e-05	1	2	0	0	1	1	3	0	1	13	3	7	9	7	7	6	4	4	0	0	0	0	0	0	0	0	0	0	0	0	0	0	0
16S_OTU02953	Bacteria	Planctomycetes	Phycisphaerae	Tepidisphaerales	WD2101_soil_group	unclassified	35.6537	0.386185	0.0001	0.000507407	0.429157	-0.429157	0.966062	0.857629	33	2.68776e-05	1	0	0	0	0	1	3	2	2	0	0	0	0	0	0	0	0	0	7	4	3	3	2	0	2	3	0	0	0	0	0	0	0
16S_OTU02966	Bacteria	Planctomycetes	Phycisphaerae	Tepidisphaerales	WD2101_soil_group	unclassified	24.461	0.243566	0.0001	0.000507407	0.28565	-0.28565	0.934563	1.00629	60	4.88684e-05	0	0	0	0	0	0	3	0	0	0	0	0	0	0	0	0	0	0	2	1	3	0	2	0	0	0	0	2	1	5	9	8	3
16S_OTU02984	Bacteria	Planctomycetes	Phycisphaerae	Tepidisphaerales	WD2101_soil_group	unclassified	31.9702	0.261877	0.0001	0.000507407	0.733628	-0.733628	0.846489	0.450044	146	0.000118913	7	6	10	22	12	10	14	8	10	2	0	0	2	0	2	1	2	3	6	3	1	1	1	3	0	1	0	1	5	2	5	1	1
16S_OTU03019	Bacteria	Bacteroidetes	Bacteroidia	Flavobacteriales	NS9_marine_group	unclassified	12.8731	0.180447	0.0001	0.000507407	-0.135948	0.135948	0.862336	1.12963	65	5.29407e-05	0	0	0	4	0	1	0	1	0	0	2	2	2	0	1	4	0	1	1	1	1	0	2	0	0	2	3	11	5	7	3	4	2
16S_OTU03056	Bacteria	Planctomycetes	Phycisphaerae	Tepidisphaerales	WD2101_soil_group	unclassified	72.6705	0.684978	0.0001	0.000507407	0.416543	-0.416543	0.943243	0.89537	275	0.00022398	16	19	19	14	17	15	15	26	17	6	4	2	6	6	7	7	6	4	8	3	10	11	4	10	8	5	3	2	4	0	1	0	0
16S_OTU03057	Bacteria	Chlamydiae	Chlamydiae	Chlamydiales	Parachlamydiaceae	Neochlamydia	49.7417	0.425161	0.0001	0.000507407	0.0158485	-0.0158485	1.03074	0.997935	31	2.52487e-05	3	2	3	3	4	4	1	4	4	0	0	0	0	0	1	0	0	0	0	0	0	0	1	0	0	0	1	0	0	0	0	0	0
16S_OTU03093	Bacteria	Patescibacteria	Parcubacteria	Candidatus_Adlerbacteria	unclassified	unclassified	28.2641	0.295014	0.0001	0.000507407	0.330231	-0.330231	1.00805	0.900958	73	5.94565e-05	9	7	8	6	9	6	3	5	5	3	0	0	3	0	4	3	0	2	0	0	0	0	0	0	0	0	0	0	0	0	0	0	0
16S_OTU03103	Bacteria	Planctomycetes	Planctomycetacia	Gemmatales	Gemmataceae	unclassified	25.9286	0.203563	0.0001	0.000507407	0.49615	-0.49615	1.08125	0.606985	156	0.000127058	2	2	7	7	12	1	1	6	5	3	6	11	18	17	19	11	6	6	0	1	2	0	0	0	0	1	2	1	0	0	2	0	3
16S_OTU03198	Bacteria	Gemmatimonadetes	Gemmatimonadetes	Gemmatimonadales	Gemmatimonadaceae	Gemmatimonas	26.3432	0.386527	0.0001	0.000507407	0.3563	-0.3563	0.918979	0.972351	76	6.18999e-05	3	7	12	11	12	1	8	4	8	0	1	1	1	1	0	0	0	0	0	0	1	2	1	1	1	0	0	0	0	0	0	0	0
16S_OTU03204	Bacteria	Proteobacteria	Alphaproteobacteria	Caulobacterales	Hyphomonadaceae	SWB02	31.0817	0.34957	0.0001	0.000507407	0.316382	-0.316382	1.27512	0.470021	100	8.14473e-05	0	0	0	0	0	0	2	1	1	0	0	0	0	0	0	2	1	0	2	0	2	1	0	4	1	1	2	7	3	12	15	9	6
16S_OTU03215	Bacteria	Verrucomicrobia	Verrucomicrobiae	Pedosphaerales	Pedosphaeraceae	unclassified	18.3397	0.216666	0.0001	0.000507407	0.217716	-0.217716	0.82384	1.13125	69	5.61986e-05	0	1	2	2	3	1	5	1	5	0	3	0	3	0	0	0	0	0	3	6	2	7	4	15	0	1	1	1	2	0	1	0	0
16S_OTU03231	Bacteria	Chloroflexi	Chloroflexia	Chloroflexales	Roseiflexaceae	unclassified	24.0377	0.266393	0.0001	0.000507407	0.178795	-0.178795	0.966153	1.02843	41	3.33934e-05	0	0	0	1	0	0	0	0	0	0	1	0	0	0	0	0	1	0	0	0	0	0	1	1	0	0	0	0	0	4	4	7	6
16S_OTU03294	Bacteria	Proteobacteria	Gammaproteobacteria	Betaproteobacteriales	Burkholderiaceae	Massilia	17.96	0.279624	0.0001	0.000507407	-0.515507	0.515507	0.811551	0.915122	333	0.000271219	29	9	19	66	44	9	25	33	13	5	3	3	3	7	4	2	4	1	7	6	5	6	2	8	1	1	2	2	2	2	1	2	0
16S_OTU03303	Bacteria	Bacteroidetes	Bacteroidia	Bacteroidales	Prolixibacteraceae	WCHB1-32	37.1382	0.201862	0.0001	0.000507407	0.679753	-0.679753	0.703926	0.764737	146	0.000118913	2	8	2	0	0	0	1	1	0	0	2	0	0	1	0	0	0	0	12	16	5	31	16	40	0	5	2	1	0	1	0	0	0
16S_OTU03318	Bacteria	Acidobacteria	Subgroup_17	unclassified	unclassified	unclassified	37.9102	0.449997	0.0001	0.000507407	0.0645164	-0.0645164	0.877575	1.13131	61	4.96828e-05	0	1	0	1	1	0	1	3	0	0	0	2	2	1	1	3	4	2	0	1	0	0	0	0	0	0	0	5	4	5	4	2	6
16S_OTU03331	Bacteria	Planctomycetes	Planctomycetacia	Pirellulales	Pirellulaceae	unclassified	29.8059	0.348143	0.0001	0.000507407	0.0991728	-0.0991728	0.909194	1.10062	304	0.0002476	17	21	32	11	20	14	25	15	15	7	3	6	6	5	6	6	3	6	12	3	5	3	7	2	6	3	5	5	7	4	4	5	4
16S_OTU03353	Bacteria	Planctomycetes	Planctomycetacia	Gemmatales	Gemmataceae	unclassified	30.5332	0.156681	0.0001	0.000507407	0.28286	-0.28286	0.931505	1.01079	63	5.13118e-05	0	0	0	0	0	0	0	0	0	0	0	0	0	0	0	0	0	0	1	2	0	3	4	5	0	0	0	0	5	0	5	6	6
16S_OTU03354	Bacteria	Proteobacteria	Deltaproteobacteria	Myxococcales	BIrii41	unclassified	19.5976	0.324161	0.0001	0.000507407	0.576141	-0.576141	0.812893	0.833727	86	7.00447e-05	5	6	4	3	3	2	4	3	3	3	0	1	3	1	3	0	1	0	2	5	6	1	3	2	4	4	2	1	2	0	5	1	2
16S_OTU03355	Bacteria	Planctomycetes	Planctomycetacia	Gemmatales	Gemmataceae	unclassified	38.1587	0.451385	0.0001	0.000507407	-0.095307	0.095307	0.570917	1.30906	54	4.39815e-05	0	0	0	2	0	1	0	1	2	1	1	3	2	1	3	4	3	3	1	0	0	0	0	0	2	2	0	2	0	2	2	4	1
16S_OTU03389	Bacteria	Proteobacteria	Alphaproteobacteria	Caulobacterales	Hyphomonadaceae	SWB02	49.0258	0.449517	0.0001	0.000507407	0.269344	-0.269344	0.861628	1.07833	199	0.00016208	1	0	1	1	1	2	1	0	4	0	4	1	3	4	4	5	3	2	1	0	3	1	2	3	12	4	1	14	11	16	29	12	17
16S_OTU03394	Bacteria	Gemmatimonadetes	Gemmatimonadetes	Gemmatimonadales	Gemmatimonadaceae	unclassified	19.5345	0.29621	0.0001	0.000507407	0.253206	-0.253206	0.96185	0.998949	51	4.15381e-05	11	5	3	4	5	3	9	5	3	3	0	0	0	0	0	0	0	0	0	0	0	0	0	0	0	0	0	0	0	0	0	0	0
16S_OTU03442	Bacteria	Proteobacteria	Deltaproteobacteria	Myxococcales	bacteriap25	unclassified	36.6097	0.348273	0.0001	0.000507407	0.608614	-0.608614	0.933412	0.634954	57	4.6425e-05	2	0	0	0	0	0	1	0	0	0	2	1	0	1	0	2	0	1	3	1	2	0	0	2	0	1	1	3	5	3	4	1	4
16S_OTU03449	Bacteria	Proteobacteria	Gammaproteobacteria	Steroidobacterales	Steroidobacteraceae	Steroidobacter	17.1179	0.25688	0.0001	0.000507407	0.00903878	-0.00903878	1.03528	0.993398	72	5.8642e-05	0	2	0	3	1	3	3	0	3	0	0	0	0	0	0	2	0	1	4	2	3	5	2	2	4	9	7	1	1	1	2	1	3
16S_OTU03453	Bacteria	Proteobacteria	Alphaproteobacteria	Rhizobiales	Xanthobacteraceae	unclassified	33.3493	0.225853	0.0001	0.000507407	0.533763	-0.533763	0.996577	0.679951	1314	0.00107022	39	51	53	42	32	42	15	30	17	71	81	84	70	35	60	93	55	58	24	27	23	18	15	13	28	43	25	37	45	26	5	18	14
16S_OTU03471	Bacteria	Proteobacteria	Gammaproteobacteria	Diplorickettsiales	Diplorickettsiaceae	Aquicella	26.4239	0.256061	0.0001	0.000507407	0.550017	-0.550017	0.902596	0.776863	138	0.000112397	14	15	9	12	14	9	10	5	7	4	2	3	2	3	3	2	2	0	0	2	1	1	1	2	1	1	0	1	1	1	4	0	0
16S_OTU03474	Bacteria	Proteobacteria	Deltaproteobacteria	Myxococcales	Haliangiaceae	Haliangium	34.8287	0.211807	0.0001	0.000507407	0.675779	-0.675779	0.90052	0.529912	29	2.36197e-05	0	1	0	1	1	0	0	1	1	0	1	1	1	2	1	5	4	4	0	0	0	0	0	0	0	0	1	0	1	0	1	0	1
16S_OTU03504	Bacteria	Chloroflexi	Chloroflexia	Thermomicrobiales	Thermomicrobiaceae	Nitrolancea	16.2166	0.23423	0.0001	0.000507407	0.241348	-0.241348	1.02991	0.935283	40	3.25789e-05	3	4	1	6	1	2	13	4	5	0	0	0	0	0	0	0	0	0	1	0	0	0	0	0	0	0	0	0	0	0	0	0	0
16S_OTU03568	Bacteria	Acidobacteria	Subgroup_6	unclassified	unclassified	unclassified	27.8281	0.241036	0.0001	0.000507407	-0.394671	0.394671	0.762802	1.07103	61	4.96828e-05	0	1	0	1	0	0	0	1	0	0	0	0	0	0	0	0	0	0	1	2	1	0	0	1	0	0	0	1	0	5	10	8	8
16S_OTU03590	Bacteria	Planctomycetes	OM190	unclassified	unclassified	unclassified	17.438	0.192511	0.0001	0.000507407	0.733033	-0.733033	0.844746	0.455342	29	2.36197e-05	0	0	0	0	0	0	0	0	0	0	0	0	0	0	0	0	0	0	0	0	0	1	1	1	0	0	0	2	0	1	3	1	4
16S_OTU03607	Bacteria	Patescibacteria	Saccharimonadia	Saccharimonadales	unclassified	unclassified	17.0836	0.113296	0.0001	0.000507407	-0.432964	0.432964	0.395185	1.22706	85	6.92302e-05	26	22	12	1	3	2	3	2	3	4	1	3	0	0	1	0	1	0	0	0	1	0	0	0	0	0	0	0	0	0	0	0	0
16S_OTU03649	Bacteria	Chloroflexi	Anaerolineae	SBR1031	unclassified	unclassified	22.4973	0.288576	0.0001	0.000507407	-0.0600009	0.0600009	0.755308	1.21684	42	3.42079e-05	0	0	0	0	0	0	0	0	0	0	1	0	0	0	0	0	1	0	0	0	3	0	0	0	0	1	2	0	3	3	5	6	4
16S_OTU03654	Bacteria	Bacteroidetes	Bacteroidia	Chitinophagales	Chitinophagaceae	unclassified	56.2538	0.447791	0.0001	0.000507407	-0.307443	0.307443	1.15015	0.731994	161	0.00013113	8	8	15	5	4	5	2	3	12	1	1	3	2	1	0	0	1	2	13	6	8	18	9	16	5	3	2	1	3	1	0	0	0
16S_OTU03661	Bacteria	Planctomycetes	Planctomycetacia	Pirellulales	Pirellulaceae	Pir4_lineage	46.3489	0.258182	0.0001	0.000507407	0.313299	-0.313299	0.764847	1.12515	88	7.16736e-05	0	0	0	0	0	0	3	2	0	0	1	0	0	0	0	1	1	0	2	2	1	0	2	4	2	4	1	1	3	5	11	9	8
16S_OTU03667	Bacteria	Cyanobacteria	Oxyphotobacteria	Nostocales	Nostocaceae	unclassified	33.4251	0.358861	0.0001	0.000507407	-0.285673	0.285673	0.795415	1.11952	65	5.29407e-05	0	0	1	0	0	0	2	0	1	0	1	4	4	2	1	0	0	1	3	3	1	1	0	0	0	1	0	2	1	3	4	6	7
16S_OTU03711	Bacteria	Proteobacteria	Gammaproteobacteria	Betaproteobacteriales	Gallionellaceae	Gallionella	23.3345	0.218257	0.0001	0.000507407	-0.521486	0.521486	0.633535	1.03998	30	2.44342e-05	2	3	1	0	0	1	1	1	0	0	1	0	0	0	0	0	0	0	1	0	4	4	3	6	0	0	0	0	1	0	1	0	0
16S_OTU03738	Bacteria	Planctomycetes	Planctomycetacia	Pirellulales	Pirellulaceae	unclassified	16.7641	0.220945	0.0001	0.000507407	0.575056	-0.575056	0.976573	0.636275	41	3.33934e-05	0	0	0	0	0	0	0	0	0	0	0	0	0	0	0	1	0	2	2	1	0	0	0	0	0	0	0	2	0	0	5	5	7
16S_OTU03745	Bacteria	Actinobacteria	Thermoleophilia	Solirubrobacterales	Solirubrobacteraceae	Conexibacter	16.5813	0.204989	0.0001	0.000507407	0.219393	-0.219393	1.07287	0.897693	48	3.90947e-05	0	4	7	2	4	1	7	11	6	3	0	0	1	1	0	0	0	0	0	0	0	0	0	0	1	0	0	0	0	0	0	0	0
16S_OTU03799	Bacteria	Bacteroidetes	Bacteroidia	Chitinophagales	Chitinophagaceae	unclassified	28.281	0.360346	0.0001	0.000507407	0.67848	-0.67848	0.820477	0.640947	26	2.11763e-05	0	0	0	0	0	0	0	1	0	2	5	3	3	1	1	3	1	4	0	0	0	0	0	0	0	0	0	1	0	0	1	0	0
16S_OTU03819	Bacteria	Verrucomicrobia	Verrucomicrobiae	Chthoniobacterales	Chthoniobacteraceae	Chthoniobacter	26.7113	0.365344	0.0001	0.000507407	0.350268	-0.350268	0.991556	0.903234	49	3.99092e-05	1	0	0	0	0	0	0	0	1	0	0	1	0	0	1	1	3	1	1	0	0	0	1	1	1	0	2	0	5	3	5	4	4
16S_OTU03823	Bacteria	unclassified	unclassified	unclassified	unclassified	unclassified	36.0236	0.356577	0.0001	0.000507407	0.52403	-0.52403	1.11878	0.475006	512	0.00041701	43	45	39	18	9	8	17	12	8	2	22	8	6	7	5	4	9	1	18	27	21	14	22	40	12	9	25	12	21	6	3	5	5
16S_OTU03832	Bacteria	Hydrogenedentes	Hydrogenedentia	Hydrogenedentiales	Hydrogenedensaceae	unclassified	17.4854	0.129523	0.0001	0.000507407	0.310885	-0.310885	0.884878	1.03496	33	2.68776e-05	0	0	0	0	0	0	0	0	0	0	0	0	0	0	0	0	0	0	3	1	0	1	2	1	0	0	0	0	0	0	4	4	5
16S_OTU03834	Bacteria	Verrucomicrobia	Verrucomicrobiae	Chthoniobacterales	Chthoniobacteraceae	Chthoniobacter	29.689	0.355702	0.0001	0.000507407	-0.457738	0.457738	0.551603	1.14493	28	2.28052e-05	0	0	0	0	0	0	0	0	0	0	2	0	0	1	0	1	1	2	0	0	0	0	0	0	0	0	0	1	0	1	4	2	2
16S_OTU03842	Bacteria	Planctomycetes	Planctomycetacia	Gemmatales	Gemmataceae	unclassified	19.429	0.257622	0.0001	0.000507407	-0.116338	0.116338	1.15207	0.838391	39	3.17644e-05	0	0	0	0	0	0	1	1	0	0	0	0	0	0	0	0	0	1	1	2	0	0	1	0	0	0	0	2	3	4	9	4	3
16S_OTU03846	Bacteria	Proteobacteria	Deltaproteobacteria	Myxococcales	bacteriap25	unclassified	21.7742	0.271077	0.0001	0.000507407	-0.00984209	0.00984209	0.990828	1.03773	34	2.76921e-05	0	0	0	0	0	0	0	0	0	0	0	0	0	0	0	0	1	1	1	0	1	2	0	2	0	0	0	2	0	2	6	3	2
16S_OTU03847	Bacteria	Cyanobacteria	Oxyphotobacteria	Chloroplast	unclassified	unclassified	23.4927	0.36017	0.0001	0.000507407	0.600218	-0.600218	1.10114	0.28879	100	8.14473e-05	8	9	3	7	4	3	4	6	5	1	3	2	1	1	0	1	2	0	2	2	2	5	3	3	3	1	4	1	0	0	4	2	2
16S_OTU03856	Bacteria	Chloroflexi	Chloroflexia	Thermomicrobiales	AKYG1722	unclassified	36.4893	0.461747	0.0001	0.000507407	0.098776	-0.098776	0.500707	1.33696	75	6.10855e-05	6	10	2	7	7	4	9	7	4	0	0	0	0	0	1	0	3	2	2	1	0	5	3	1	1	0	0	0	0	0	0	0	0
16S_OTU03861	Bacteria	Bacteroidetes	Bacteroidia	Bacteroidales	Prolixibacteraceae	WCHB1-32	30.1488	0.16595	0.0001	0.000507407	0.178671	-0.178671	1.12375	0.853469	40	3.25789e-05	0	2	0	0	0	0	0	0	0	0	1	0	0	0	0	0	0	0	3	5	0	7	6	12	1	1	0	0	2	0	0	0	0
16S_OTU03875	Bacteria	Proteobacteria	Gammaproteobacteria	Betaproteobacteriales	SC-I-84	unclassified	64.0923	0.162303	0.0001	0.000507407	-0.352259	0.352259	0.797145	1.07732	128	0.000104253	8	5	7	4	8	1	26	21	21	1	0	0	6	4	5	2	2	2	0	0	0	1	0	1	0	0	2	0	0	0	0	0	0
16S_OTU03886	Bacteria	Planctomycetes	Phycisphaerae	Tepidisphaerales	CPla-3_termite_group	unclassified	53.616	0.460376	0.0001	0.000507407	0.30095	-0.30095	1.19878	0.655702	116	9.44789e-05	8	3	4	9	3	5	14	10	12	2	2	2	3	1	1	5	2	1	1	4	3	5	4	6	4	0	1	1	0	0	0	0	0
16S_OTU03922	Bacteria	Acidobacteria	Subgroup_17	unclassified	unclassified	unclassified	17.9876	0.333369	0.0001	0.000507407	0.0356247	-0.0356247	1.05628	0.969751	53	4.31671e-05	0	0	0	0	1	1	0	2	2	1	0	1	2	2	0	3	3	2	0	1	0	0	1	0	2	1	2	3	3	3	3	4	1
16S_OTU03936	Bacteria	Acidobacteria	Subgroup_6	unclassified	unclassified	unclassified	19.6051	0.230078	0.0001	0.000507407	-0.410033	0.410033	1.01862	0.815603	138	0.000112397	10	10	3	7	9	4	0	3	1	11	8	13	11	7	16	5	6	8	0	1	0	0	0	0	0	0	0	1	4	0	0	0	0
16S_OTU03954	Bacteria	Planctomycetes	Phycisphaerae	Tepidisphaerales	WD2101_soil_group	unclassified	29.2639	0.251511	0.0001	0.000507407	-0.188008	0.188008	0.951217	1.03883	41	3.33934e-05	0	0	0	0	0	0	0	0	0	0	0	0	0	0	0	0	0	0	1	0	0	0	0	0	0	0	0	1	4	3	7	2	1
16S_OTU03962	Bacteria	Bacteroidetes	Bacteroidia	Cytophagales	Microscillaceae	unclassified	34.2601	0.304974	0.0001	0.000507407	0.085146	-0.085146	0.768467	1.20538	100	8.14473e-05	0	0	0	7	5	2	6	4	8	0	0	0	0	0	0	0	0	0	5	3	2	1	6	3	6	20	16	0	1	0	1	0	0
16S_OTU04022	Bacteria	Proteobacteria	Gammaproteobacteria	Betaproteobacteriales	Burkholderiaceae	Lautropia	22.7465	0.212155	0.0001	0.000507407	-0.196991	0.196991	0.366605	1.35729	39	3.17644e-05	0	0	0	1	1	1	0	1	0	0	0	0	0	0	0	0	0	0	4	2	1	2	0	2	4	7	6	0	2	1	3	1	0
16S_OTU04023	Bacteria	Patescibacteria	Gracilibacteria	Candidatus_Peribacteria	unclassified	unclassified	22.3841	0.307413	0.0001	0.000507407	-0.165138	0.165138	0.604731	1.27882	19	1.5475e-05	2	1	0	0	1	1	1	1	1	0	0	0	0	0	0	0	0	0	3	3	1	0	1	2	0	0	0	0	0	1	0	0	0
16S_OTU04049	Bacteria	Bacteroidetes	Bacteroidia	Bacteroidales	Paludibacteraceae	Paludibacter	15.3447	0.139212	0.0001	0.000507407	-0.50683	0.50683	0.556831	1.09763	36	2.9321e-05	3	0	0	0	0	0	1	1	0	0	2	1	0	0	0	0	0	0	1	3	0	10	4	8	1	0	1	0	0	0	0	0	0
16S_OTU04162	Bacteria	Patescibacteria	Saccharimonadia	Saccharimonadales	unclassified	unclassified	27.4346	0.296713	0.0001	0.000507407	-0.498472	0.498472	0.676199	1.03701	41	3.33934e-05	4	1	3	6	2	5	5	6	4	0	0	0	0	1	0	2	0	0	1	0	0	0	0	0	0	0	0	1	0	0	0	0	0
16S_OTU04277	Bacteria	Acidobacteria	Acidobacteriia	Solibacterales	Solibacteraceae_(Subgroup_3)	Bryobacter	34.2072	0.290694	0.0001	0.000507407	0.42578	-0.42578	1.21731	0.43939	37	3.01355e-05	0	0	0	1	0	0	0	0	0	0	0	0	0	0	0	0	0	0	0	0	0	0	1	0	1	1	0	2	1	3	6	2	4
16S_OTU04366	Bacteria	Rokubacteria	NC10	Rokubacteriales	unclassified	unclassified	34.0162	0.370431	0.0001	0.000507407	-0.461664	0.461664	0.379111	1.20986	43	3.50223e-05	0	0	0	0	0	0	0	0	0	0	1	1	0	0	0	1	3	0	1	1	1	0	0	0	1	0	1	2	0	3	5	6	4
16S_OTU04371	Bacteria	Dependentiae	Babeliae	Babeliales	Vermiphilaceae	unclassified	17.7917	0.298029	0.0001	0.000507407	-0.618888	0.618888	0.558414	0.967415	35	2.85065e-05	2	3	7	4	4	1	4	0	2	0	0	0	1	0	2	1	0	0	0	0	0	1	2	1	0	0	0	0	0	0	0	0	0
16S_OTU04454	Bacteria	Proteobacteria	Gammaproteobacteria	Betaproteobacteriales	unclassified	unclassified	22.4968	0.316762	0.0001	0.000507407	-0.0743233	0.0743233	0.406455	1.37183	33	2.68776e-05	0	0	1	0	0	0	0	0	0	5	2	6	2	2	6	6	2	1	0	0	0	0	0	0	0	0	0	0	0	0	0	0	0
16S_OTU04471	Bacteria	Planctomycetes	Phycisphaerae	Tepidisphaerales	WD2101_soil_group	unclassified	86.4051	0.402889	0.0001	0.000507407	-0.470734	0.470734	0.755124	1.00963	239	0.000194659	10	23	7	2	0	1	0	0	0	1	6	4	0	2	2	0	0	0	19	22	16	16	22	29	10	16	10	2	6	2	2	4	4
16S_OTU04526	Bacteria	Patescibacteria	Parcubacteria	unclassified	unclassified	unclassified	16.3048	0.177277	0.0001	0.000507407	0.58308	-0.58308	0.901236	0.725697	20	1.62895e-05	0	0	0	0	0	0	0	0	0	0	0	1	2	0	0	0	0	0	0	0	1	0	1	0	0	0	0	0	0	0	1	2	2
16S_OTU04531	Bacteria	Verrucomicrobia	Verrucomicrobiae	Pedosphaerales	Pedosphaeraceae	unclassified	22.9817	0.167295	0.0001	0.000507407	-0.411759	0.411759	0.874837	0.966667	23	1.87329e-05	0	0	0	0	0	0	0	0	0	0	0	0	0	0	0	0	0	0	1	1	0	0	1	0	0	0	0	0	0	2	6	5	3
16S_OTU04606	Bacteria	Gemmatimonadetes	Gemmatimonadetes	Gemmatimonadales	Gemmatimonadaceae	unclassified	24.3464	0.274858	0.0001	0.000507407	0.383625	-0.383625	0.777738	1.06878	26	2.11763e-05	1	2	0	1	0	0	1	1	1	0	0	0	0	0	0	0	0	0	3	3	0	4	2	4	0	1	0	1	1	0	0	0	0
16S_OTU04615	Bacteria	Chloroflexi	Anaerolineae	Caldilineales	Caldilineaceae	unclassified	16.7546	0.112871	0.0001	0.000507407	0.132666	-0.132666	0.891724	1.10742	34	2.76921e-05	0	0	0	0	0	0	2	0	0	0	0	0	0	0	0	0	0	0	3	1	0	10	6	7	0	0	1	0	2	0	0	1	1
16S_OTU04625	Bacteria	Verrucomicrobia	Verrucomicrobiae	Pedosphaerales	Pedosphaeraceae	unclassified	34.6107	0.434815	0.0001	0.000507407	0.409056	-0.409056	1.26087	0.338667	61	4.96828e-05	0	1	0	0	2	0	2	1	2	1	1	1	0	4	2	1	2	3	1	0	0	0	0	0	0	1	0	3	6	6	2	4	3
16S_OTU04699	Bacteria	Patescibacteria	Microgenomatia	Candidatus_Woesebacteria	unclassified	unclassified	20.8622	0.244666	0.0001	0.000507407	0.717101	-0.717101	0.8866	0.428719	41	3.33934e-05	6	3	3	2	1	0	6	4	4	0	2	0	0	0	1	0	0	0	1	1	3	0	0	0	0	1	0	0	1	0	0	1	0
16S_OTU04792	Bacteria	Acidobacteria	Subgroup_6	unclassified	unclassified	unclassified	40.825	0.210773	0.0001	0.000507407	0.192789	-0.192789	1.18923	0.752228	67	5.45697e-05	2	3	2	0	0	0	0	1	0	4	3	2	3	7	2	14	8	16	0	0	0	0	0	0	0	0	0	0	0	0	0	0	0
16S_OTU04835	Bacteria	Proteobacteria	Gammaproteobacteria	Betaproteobacteriales	Burkholderiaceae	unclassified	37.1864	0.306762	0.0001	0.000507407	0.327074	-0.327074	1.11708	0.764474	446	0.000363255	19	28	32	8	6	13	22	18	27	6	12	15	8	6	6	7	8	10	7	29	12	36	19	50	4	4	10	8	6	3	0	0	1
16S_OTU04929	Bacteria	Proteobacteria	Alphaproteobacteria	Tistrellales	Geminicoccaceae	unclassified	33.5784	0.245607	0.0001	0.000507407	-0.110958	0.110958	0.775668	1.19628	35	2.85065e-05	0	0	0	0	0	0	0	0	0	0	0	0	0	0	0	0	0	0	1	3	1	0	1	2	0	1	0	1	1	2	3	4	4
16S_OTU05025	Bacteria	Planctomycetes	Phycisphaerae	Phycisphaerales	Phycisphaeraceae	unclassified	27.6416	0.395587	0.0001	0.000507407	-0.14542	0.14542	0.951753	1.05271	30	2.44342e-05	0	0	1	1	4	3	2	3	2	0	0	0	0	0	0	0	0	0	1	1	1	2	0	5	1	1	1	0	1	0	0	0	0
16S_OTU05036	Bacteria	Bacteroidetes	Bacteroidia	Cytophagales	Microscillaceae	unclassified	27.5833	0.313563	0.0001	0.000507407	-0.608071	0.608071	0.534315	0.995153	60	4.88684e-05	3	0	0	3	2	0	2	0	0	5	6	4	3	4	6	12	5	5	0	0	0	0	0	0	0	0	0	0	0	0	0	0	0
16S_OTU05107	Bacteria	Patescibacteria	Saccharimonadia	Saccharimonadales	unclassified	unclassified	28.6426	0.219499	0.0001	0.000507407	0.155971	-0.155971	1.1836	0.77872	40	3.25789e-05	5	3	1	6	6	6	0	2	0	1	0	1	2	0	0	0	0	0	0	0	0	3	1	2	0	0	0	0	0	1	0	0	0
16S_OTU05249	Bacteria	Chloroflexi	Dehalococcoidia	S085	unclassified	unclassified	47.653	0.200548	0.0001	0.000507407	-0.314699	0.314699	0.40083	1.2994	284	0.00023131	0	0	0	0	0	0	0	0	0	0	0	0	0	0	0	0	0	1	6	6	1	0	5	12	4	7	5	0	0	7	49	27	32
16S_OTU05286	Bacteria	Actinobacteria	Acidimicrobiia	Actinomarinales	unclassified	unclassified	25.1573	0.234275	0.0001	0.000507407	-0.52738	0.52738	0.616087	1.04416	38	3.095e-05	0	0	0	0	0	0	0	0	0	0	0	0	0	0	0	0	0	0	2	2	1	0	0	2	0	0	1	1	3	2	3	1	5
16S_OTU05320	Bacteria	Proteobacteria	Gammaproteobacteria	Xanthomonadales	Rhodanobacteraceae	Mizugakiibacter	27.187	0.345961	0.0001	0.000507407	-0.179448	0.179448	0.96816	1.0263	39	3.17644e-05	5	2	7	2	3	2	2	4	9	1	0	0	0	0	0	0	0	0	0	0	0	1	1	0	0	0	0	0	0	0	0	0	0
16S_OTU05348	Bacteria	Actinobacteria	Acidimicrobiia	Microtrichales	Ilumatobacteraceae	unclassified	28.2264	0.310424	0.0001	0.000507407	0.344271	-0.344271	1.16455	0.672048	693	0.00056443	13	5	6	9	9	7	10	9	7	4	16	16	7	11	12	11	7	17	22	17	16	14	18	18	32	32	27	26	44	30	38	42	65
16S_OTU05474	Bacteria	Nitrospirae	Nitrospira	Nitrospirales	Nitrospiraceae	Nitrospira	22.3049	0.3561	0.0001	0.000507407	0.308516	-0.308516	0.863335	1.05447	1310	0.00106696	15	6	15	32	28	15	31	55	54	12	78	68	48	48	63	50	112	65	33	11	50	2	15	21	31	16	6	46	61	54	38	43	12
16S_OTU05532	Bacteria	Cyanobacteria	Melainabacteria	Obscuribacterales	unclassified	unclassified	30.9418	0.179246	0.0001	0.000507407	-0.350483	0.350483	0.437922	1.26764	70	5.70131e-05	4	2	2	0	0	0	0	0	0	14	9	20	3	7	3	1	3	2	0	0	0	0	0	0	0	0	0	0	0	0	0	0	0
16S_OTU05682	Bacteria	Planctomycetes	Phycisphaerae	Tepidisphaerales	WD2101_soil_group	unclassified	23.4332	0.381851	0.0001	0.000507407	0.158649	-0.158649	0.90305	1.09088	210	0.000171039	18	9	21	10	24	9	21	13	16	1	6	4	2	3	2	11	5	4	2	2	0	2	9	1	0	5	3	1	1	1	1	0	1
16S_OTU05685	Bacteria	Proteobacteria	Alphaproteobacteria	Elsterales	unclassified	unclassified	53.7775	0.31876	0.0001	0.000507407	-0.0815747	0.0815747	0.852337	1.14815	548	0.000446331	21	16	12	14	2	8	9	6	9	9	20	15	13	8	10	6	8	4	31	39	24	36	32	43	35	24	22	9	10	2	10	8	8
16S_OTU05695	Bacteria	Bacteroidetes	Bacteroidia	Sphingobacteriales	Sphingobacteriaceae	Mucilaginibacter	25.807	0.263452	0.0001	0.000507407	-0.136378	0.136378	1.1325	0.858419	64	5.21263e-05	0	3	4	2	2	1	3	1	0	11	6	7	6	3	4	5	4	2	0	0	0	0	0	0	0	0	0	0	0	0	0	0	0
16S_OTU05816	Bacteria	Planctomycetes	Planctomycetacia	Pirellulales	Pirellulaceae	Pir4_lineage	25.5769	0.309867	0.0001	0.000507407	0.342239	-0.342239	1.19888	0.611121	57	4.6425e-05	7	6	3	8	3	1	8	5	9	0	0	0	3	1	0	0	1	1	0	0	0	0	0	1	0	0	0	0	0	0	0	0	0
16S_OTU05820	Bacteria	Planctomycetes	Planctomycetacia	Pirellulales	Pirellulaceae	Pirellula	21.0143	0.263776	0.0001	0.000507407	-0.429866	0.429866	0.646808	1.11766	16	1.30316e-05	3	2	1	1	0	0	0	0	0	0	0	0	0	0	0	0	0	0	2	1	2	0	1	0	1	1	0	0	0	0	0	1	0
16S_OTU05828	Bacteria	Bacteroidetes	Bacteroidia	Cytophagales	Hymenobacteraceae	Hymenobacter	13.6814	0.18083	0.0001	0.000507407	-0.367439	0.367439	0.38686	1.27407	37	3.01355e-05	0	0	1	8	13	2	2	4	1	0	0	0	0	0	0	0	0	0	1	1	0	1	0	3	0	0	0	0	0	0	0	0	0
16S_OTU05834	Bacteria	Patescibacteria	Gracilibacteria	Candidatus_Peregrinibacteria	unclassified	unclassified	14.0874	0.209238	0.0001	0.000507407	0.360904	-0.360904	1.01861	0.863379	21	1.71039e-05	0	1	0	1	0	0	0	0	0	2	0	1	2	1	1	2	1	1	0	0	1	0	0	0	0	0	0	4	1	2	0	0	0
16S_OTU05845	Bacteria	Proteobacteria	Gammaproteobacteria	Xanthomonadales	Rhodanobacteraceae	unclassified	32.5914	0.300778	0.0001	0.000507407	-0.445259	0.445259	0.927724	0.882222	20	1.62895e-05	0	0	0	0	0	0	0	0	0	0	0	0	0	0	0	0	0	0	0	0	0	0	0	1	0	0	0	1	1	1	4	3	2
16S_OTU05848	Bacteria	Verrucomicrobia	Verrucomicrobiae	Pedosphaerales	Pedosphaeraceae	unclassified	18.5298	0.206724	0.0001	0.000507407	0.230309	-0.230309	0.928203	1.0416	67	5.45697e-05	1	2	5	1	0	0	3	1	0	0	0	1	0	0	0	0	0	0	4	12	1	15	6	13	1	0	0	1	0	0	0	0	0
16S_OTU05870	Bacteria	Acidobacteria	Subgroup_6	unclassified	unclassified	unclassified	31.6239	0.142555	0.0001	0.000507407	-0.44954	0.44954	0.600221	1.12721	164	0.000133574	23	27	46	5	6	3	12	4	11	7	8	5	3	0	4	0	0	0	0	0	0	0	0	0	0	0	0	0	0	0	0	0	0
16S_OTU05921	Bacteria	Proteobacteria	Alphaproteobacteria	unclassified	unclassified	unclassified	32.0432	0.285798	0.0001	0.000507407	-0.304786	0.304786	0.8415	1.07424	35	2.85065e-05	0	0	0	0	0	0	0	0	0	0	0	0	0	0	0	0	0	0	2	1	1	0	1	1	0	0	0	1	1	3	3	6	4
16S_OTU06027	Bacteria	Acidobacteria	Subgroup_6	unclassified	unclassified	unclassified	19.1976	0.125863	0.0001	0.000507407	-0.498384	0.498384	0.589745	1.08859	54	4.39815e-05	0	0	1	0	0	0	0	2	0	0	0	1	0	1	0	2	4	1	4	1	5	6	8	8	3	2	1	2	2	0	0	0	0
16S_OTU06254	Bacteria	Acidobacteria	Blastocatellia_(Subgroup_4)	Blastocatellales	Blastocatellaceae	Stenotrophobacter	38.2795	0.436414	0.0001	0.000507407	-0.614672	0.614672	0.590333	0.954063	132	0.00010751	1	6	0	13	5	4	4	8	8	0	1	2	1	1	0	0	0	1	12	6	7	8	8	11	2	4	4	0	0	0	1	3	1
16S_OTU06324	Bacteria	Acidobacteria	Blastocatellia_(Subgroup_4)	45597	unclassified	unclassified	25.9177	0.305896	0.0001	0.000507407	0.0959074	-0.0959074	0.84062	1.15443	374	0.000304613	0	0	0	0	0	0	0	0	0	0	1	0	0	0	0	0	0	0	9	27	2	7	22	19	6	9	6	22	16	29	30	40	37
16S_OTU06351	Bacteria	Proteobacteria	Gammaproteobacteria	Betaproteobacteriales	SC-I-84	unclassified	34.3699	0.409701	0.0001	0.000507407	-0.122768	0.122768	0.992012	1.02119	259	0.000210948	20	20	6	15	11	8	16	28	48	1	1	6	2	5	3	3	8	2	3	1	4	9	5	1	16	11	6	0	0	0	0	0	0
16S_OTU06386	Bacteria	Acidobacteria	Subgroup_6	unclassified	unclassified	unclassified	11.85	0.169834	0.0001	0.000507407	0.000873477	-0.000873477	0.760621	1.21667	37	3.01355e-05	0	0	0	0	0	0	0	0	0	0	0	0	0	0	0	0	0	0	0	2	0	1	0	1	0	0	0	0	0	2	6	2	11
16S_OTU06388	Bacteria	Bacteroidetes	Bacteroidia	Sphingobacteriales	AKYH767	unclassified	15.0382	0.18963	0.0001	0.000507407	0.339134	-0.339134	0.588081	1.2122	20	1.62895e-05	0	0	0	0	0	0	0	0	1	0	0	0	0	0	0	0	1	0	0	0	1	0	0	1	0	0	0	0	1	1	5	3	2
16S_OTU06393	Bacteria	Bacteroidetes	Bacteroidia	Flavobacteriales	Flavobacteriaceae	Flavobacterium	81.1435	0.317243	0.0001	0.000507407	-0.189195	0.189195	0.617299	1.26569	53	4.31671e-05	0	0	0	0	0	0	0	0	0	0	0	0	0	0	0	0	0	0	1	3	5	8	6	11	6	6	4	0	0	0	0	1	2
16S_OTU06551	Bacteria	Patescibacteria	Saccharimonadia	Saccharimonadales	unclassified	unclassified	79.4414	0.375139	0.0001	0.000507407	-0.0592866	0.0592866	0.749554	1.22047	34	2.76921e-05	6	4	7	4	3	2	3	1	0	0	0	0	0	0	0	0	0	0	0	0	0	1	2	1	0	0	0	0	0	0	0	0	0
16S_OTU06561	Bacteria	Verrucomicrobia	Verrucomicrobiae	Chthoniobacterales	Chthoniobacteraceae	Candidatus_Udaeobacter	29.4558	0.198062	0.0001	0.000507407	0.183422	-0.183422	0.750249	1.19361	157	0.000127872	0	0	0	0	0	0	0	0	0	0	4	0	0	0	0	0	0	0	22	34	8	17	26	32	2	1	2	1	0	0	2	2	4
16S_OTU06598	Bacteria	Proteobacteria	Alphaproteobacteria	Rhizobiales	Xanthobacteraceae	unclassified	49.9104	0.399081	0.0001	0.000507407	-0.137014	0.137014	0.860007	1.13113	848	0.000690673	80	82	105	60	97	45	79	59	78	48	6	3	17	21	33	10	6	4	3	2	0	6	1	1	0	0	0	1	1	0	0	0	0
16S_OTU06654	Bacteria	Bacteroidetes	Bacteroidia	Chitinophagales	Chitinophagaceae	unclassified	105.406	0.428219	0.0001	0.000507407	-0.312285	0.312285	0.814211	1.09058	443	0.000360811	21	28	45	9	8	8	18	18	21	5	2	4	6	5	4	3	3	6	22	29	17	47	29	42	7	6	6	2	4	3	2	2	5
16S_OTU06677	Bacteria	Planctomycetes	Planctomycetacia	Pirellulales	Pirellulaceae	Pirellula	25.8802	0.295259	0.0001	0.000507407	0.534333	-0.534333	1.04041	0.609722	329	0.000267962	4	0	2	5	2	3	5	7	4	0	4	4	1	0	4	10	4	5	5	16	6	10	11	11	8	9	14	7	21	18	26	24	25
16S_OTU06810	Bacteria	Acidobacteria	Holophagae	Subgroup_7	unclassified	unclassified	36.5948	0.304693	0.0001	0.000507407	-0.161677	0.161677	0.797175	1.16961	38	3.095e-05	3	2	4	0	1	0	0	1	0	0	0	1	1	0	0	0	0	1	2	4	1	4	4	4	2	1	0	0	0	0	1	0	0
16S_OTU06824	Bacteria	Bacteroidetes	Bacteroidia	Chitinophagales	Chitinophagaceae	Dinghuibacter	44.3945	0.458667	0.0001	0.000507407	0.437	-0.437	1.08325	0.69353	162	0.000131945	4	4	12	6	1	4	7	5	1	1	4	5	1	1	3	0	0	1	10	4	10	8	11	12	20	6	15	0	1	0	1	0	0
16S_OTU06932	Bacteria	Acidobacteria	Blastocatellia_(Subgroup_4)	Blastocatellales	Blastocatellaceae	unclassified	23.3091	0.329265	0.0001	0.000507407	-0.112904	0.112904	0.869308	1.12966	323	0.000263075	5	4	10	25	11	16	19	11	17	3	5	4	1	4	7	5	5	7	12	12	9	38	13	19	10	14	6	0	5	3	5	4	6
16S_OTU07119	Bacteria	Verrucomicrobia	Verrucomicrobiae	Chthoniobacterales	Chthoniobacteraceae	Candidatus_Udaeobacter	36.8734	0.269639	0.0001	0.000507407	0.0307947	-0.0307947	0.776781	1.20558	800	0.000651578	19	17	23	17	14	15	7	5	7	44	30	49	67	41	62	62	39	32	15	15	27	14	16	18	21	6	5	28	49	10	1	11	8
16S_OTU07147	Bacteria	Bacteroidetes	Bacteroidia	Chitinophagales	Chitinophagaceae	unclassified	15.5387	0.190175	0.0001	0.000507407	0.645504	-0.645504	1.00175	0.415861	34	2.76921e-05	1	3	2	2	0	0	2	1	2	0	0	0	0	0	0	0	0	0	3	0	0	9	2	7	0	0	0	0	0	0	0	0	0
16S_OTU07215	Bacteria	Planctomycetes	Planctomycetacia	Pirellulales	Pirellulaceae	unclassified	35.0394	0.261356	0.0001	0.000507407	-0.0601162	0.0601162	0.920868	1.09689	25	2.03618e-05	0	0	0	0	0	0	0	0	0	0	0	0	0	0	0	0	1	0	0	1	0	0	0	0	0	0	1	0	1	1	4	2	3
16S_OTU07265	Bacteria	Planctomycetes	Phycisphaerae	Tepidisphaerales	WD2101_soil_group	unclassified	19.4278	0.23997	0.0001	0.000507407	0.640738	-0.640738	0.867072	0.661528	159	0.000129501	11	13	17	12	15	11	6	11	15	6	2	6	10	8	4	3	4	2	0	0	0	0	0	0	0	1	0	0	0	0	0	0	0
16S_OTU07504	Bacteria	Proteobacteria	Alphaproteobacteria	unclassified	unclassified	unclassified	15.6954	0.237018	0.0001	0.000507407	-0.314983	0.314983	0.713881	1.15719	17	1.3846e-05	0	0	0	0	0	0	0	0	0	0	0	0	0	0	0	0	0	0	0	0	0	0	0	0	1	0	1	2	1	4	1	2	1
16S_OTU07578	Bacteria	Bacteroidetes	Bacteroidia	Chitinophagales	37-13	unclassified	52.9519	0.430044	0.0001	0.000507407	0.250726	-0.250726	1.1976	0.701042	19	1.5475e-05	0	1	0	0	0	0	1	0	0	2	1	2	2	2	2	1	2	2	0	0	0	0	0	0	0	0	0	0	1	0	0	0	0
16S_OTU07618	Bacteria	Planctomycetes	Phycisphaerae	Tepidisphaerales	WD2101_soil_group	unclassified	42.8432	0.401427	0.0001	0.000507407	0.41401	-0.41401	0.94126	0.899933	75	6.10855e-05	0	4	1	0	1	1	1	0	2	1	2	5	1	3	0	9	6	5	1	0	1	1	0	0	1	1	1	5	4	4	2	2	4
16S_OTU07624	Bacteria	Acidobacteria	Subgroup_6	unclassified	unclassified	unclassified	20.6519	0.254852	0.0001	0.000507407	0.301898	-0.301898	1.32927	0.314401	201	0.000163709	3	6	6	15	6	4	1	9	9	16	6	12	22	18	21	21	4	15	1	0	1	0	0	0	0	1	0	2	0	1	0	0	0
16S_OTU07752	Bacteria	Proteobacteria	Gammaproteobacteria	Betaproteobacteriales	TRA3-20	unclassified	20.2557	0.260809	0.0001	0.000507407	-0.639913	0.639913	0.486353	0.977309	143	0.00011647	0	0	1	2	1	2	0	5	3	0	4	1	1	1	4	2	0	2	6	2	4	0	2	0	4	8	6	7	11	3	11	9	16
16S_OTU08010	Bacteria	Proteobacteria	Alphaproteobacteria	Rhizobiales	Xanthobacteraceae	Pseudolabrys	98.2647	0.552356	0.0001	0.000507407	0.201689	-0.201689	1.1718	0.774313	752	0.000612484	70	58	67	60	44	39	47	39	45	30	10	12	21	21	20	18	17	22	10	9	13	9	13	8	6	8	7	3	3	4	4	4	5
16S_OTU08013	Bacteria	Bacteroidetes	Bacteroidia	Sphingobacteriales	env.OPS_17	unclassified	66.158	0.355944	0.0001	0.000507407	0.560021	-0.560021	1.08298	0.470993	31	2.52487e-05	1	0	0	0	0	0	1	0	2	3	3	3	2	2	0	4	4	4	0	0	0	0	0	0	0	0	0	0	1	1	0	0	0
16S_OTU08065	Bacteria	Proteobacteria	Gammaproteobacteria	Betaproteobacteriales	Burkholderiaceae	Variovorax	80.8275	0.631569	0.0001	0.000507407	0.534832	-0.534832	0.889401	0.813663	115	9.36644e-05	0	0	0	1	0	0	0	0	1	6	3	10	11	11	8	5	2	5	1	1	1	1	1	1	0	1	1	5	5	4	5	3	10
16S_OTU08196	Bacteria	Acidobacteria	Subgroup_6	unclassified	unclassified	unclassified	21.6856	0.194203	0.0001	0.000507407	0.0699747	-0.0699747	0.889107	1.12158	116	9.44789e-05	0	0	0	0	0	0	0	0	0	0	0	0	0	0	0	0	0	0	6	5	1	0	6	5	0	0	0	0	2	6	16	22	12
16S_OTU08199	Bacteria	Proteobacteria	Gammaproteobacteria	Acidiferrobacterales	Acidiferrobacteraceae	Sulfurifustis	20.6592	0.216886	0.0001	0.000507407	0.075245	-0.075245	0.808846	1.18009	42	3.42079e-05	0	0	0	1	1	0	0	0	0	2	0	0	1	0	0	1	0	0	1	2	0	1	0	1	1	0	1	4	1	1	3	1	2
16S_OTU08243	Bacteria	Planctomycetes	Planctomycetacia	Isosphaerales	Isosphaeraceae	unclassified	39.5567	0.39581	0.0001	0.000507407	-0.434149	0.434149	0.878975	0.94185	31	2.52487e-05	3	3	3	6	1	4	4	2	4	0	0	0	0	0	0	0	0	0	0	0	0	1	0	0	0	0	0	0	0	0	0	0	0
16S_OTU08245	Bacteria	Chloroflexi	Anaerolineae	Anaerolineales	Anaerolineaceae	unclassified	84.3504	0.251626	0.0001	0.000507407	-0.125058	0.125058	0.744608	1.21296	129	0.000105067	0	0	0	0	0	0	0	0	0	0	0	0	0	0	0	0	0	0	4	2	1	1	1	2	0	0	0	4	2	0	28	15	19
16S_OTU08254	Bacteria	Firmicutes	Bacilli	Bacillales	Bacillaceae	Bacillus	27.8349	0.191382	0.0001	0.000507407	0.460414	-0.460414	1.08811	0.652644	152	0.0001238	17	13	17	7	8	5	13	14	7	2	0	3	8	11	10	2	2	1	0	1	4	0	0	0	1	2	2	0	0	0	0	0	1
16S_OTU08261	Bacteria	Verrucomicrobia	Verrucomicrobiae	Verrucomicrobiales	Rubritaleaceae	Luteolibacter	24.0549	0.363394	0.0001	0.000507407	-0.589522	0.589522	0.609132	0.975614	37	3.01355e-05	2	1	1	0	0	0	0	0	0	0	0	0	0	0	0	0	0	0	1	7	3	2	2	8	3	3	4	0	0	0	0	0	0
16S_OTU08352	Bacteria	Bacteroidetes	Bacteroidia	Chitinophagales	Chitinophagaceae	Ferruginibacter	27.8274	0.209801	0.0001	0.000507407	-0.281175	0.281175	0.984897	0.959887	108	8.79631e-05	1	0	2	0	3	2	1	6	1	1	1	1	0	0	2	0	1	3	6	5	1	15	10	18	2	9	4	0	3	1	1	2	2
16S_OTU08455	Bacteria	Acidobacteria	Subgroup_5	unclassified	unclassified	unclassified	18.6553	0.266141	0.0001	0.000507407	-0.2787	0.2787	0.943213	1.00234	29	2.36197e-05	0	0	0	0	0	0	0	0	0	0	0	0	0	0	0	0	0	0	0	0	2	1	0	1	0	0	0	3	1	4	1	1	4
16S_OTU08717	Bacteria	Acidobacteria	Blastocatellia_(Subgroup_4)	Pyrinomonadales	Pyrinomonadaceae	RB41	42.1347	0.155892	0.0001	0.000507407	0.412919	-0.412919	1.21079	0.481408	1086	0.000884518	3	2	0	0	0	0	6	15	9	1	24	18	0	1	1	6	12	6	117	72	74	135	103	170	35	23	23	18	8	31	44	31	20
16S_OTU08722	Bacteria	Proteobacteria	Gammaproteobacteria	Xanthomonadales	Rhodanobacteraceae	Rhodanobacter	22.1261	0.105112	0.0001	0.000507407	-0.229456	0.229456	0.962381	1.01052	234	0.000190587	17	13	20	14	10	7	6	8	3	20	27	27	17	12	13	9	8	3	0	0	0	0	0	0	0	0	0	0	0	0	0	0	0
16S_OTU08741	Bacteria	Verrucomicrobia	Verrucomicrobiae	Pedosphaerales	Pedosphaeraceae	unclassified	36.0064	0.339282	0.0001	0.000507407	0.0995695	-0.0995695	0.993435	1.02514	67	5.45697e-05	1	5	1	1	1	0	0	3	2	2	3	0	1	0	1	0	2	0	7	3	3	8	6	6	5	4	2	0	0	0	0	0	0
16S_OTU08786	Bacteria	Proteobacteria	Gammaproteobacteria	Betaproteobacteriales	SC-I-84	unclassified	53.4809	0.289089	0.0001	0.000507407	0.01197	-0.01197	0.673183	1.26702	206	0.000167781	0	0	0	1	0	1	0	1	0	0	2	4	5	6	2	19	16	26	5	6	7	7	4	7	1	7	5	12	9	8	8	7	8
16S_OTU08912	Bacteria	Proteobacteria	Gammaproteobacteria	Betaproteobacteriales	Burkholderiaceae	[Aquaspirillum]_arcticum_group	28.3799	0.233366	0.0001	0.000507407	0.615378	-0.615378	1.00714	0.492498	36	2.9321e-05	6	5	6	1	0	1	2	1	1	0	2	0	0	0	0	0	0	0	0	0	1	2	4	1	0	1	0	0	0	0	1	0	0
16S_OTU08958	Bacteria	Proteobacteria	Alphaproteobacteria	Acetobacterales	Acetobacteraceae	unclassified	18.7941	0.222385	0.0001	0.000507407	0.524695	-0.524695	0.939963	0.769607	18	1.46605e-05	0	1	1	2	2	3	2	2	1	0	0	0	0	0	0	0	0	0	0	0	0	0	0	1	0	0	1	0	0	0	1	0	0
16S_OTU09218	Bacteria	Verrucomicrobia	Verrucomicrobiae	Chthoniobacterales	Chthoniobacteraceae	Candidatus_Udaeobacter	62.1237	0.472051	0.0001	0.000507407	-0.252736	0.252736	0.686328	1.2052	246	0.00020036	1	3	2	4	1	3	9	5	2	6	27	15	4	3	3	8	6	19	1	1	3	0	0	0	0	0	0	4	3	7	23	21	17
16S_OTU09492	Bacteria	Proteobacteria	Alphaproteobacteria	Rhizobiales	Xanthobacteraceae	unclassified	23.7366	0.196595	0.0001	0.000507407	-0.151381	0.151381	0.862927	1.12501	1023	0.000833206	15	33	37	37	32	20	28	34	36	33	22	16	31	33	22	28	17	20	19	34	10	15	21	29	15	22	14	17	21	18	59	37	49
16S_OTU00040	Bacteria	Proteobacteria	Gammaproteobacteria	Betaproteobacteriales	SC-I-84	unclassified	21.4653	0.254946	0.0002	0.000822403	0.0873655	-0.0873655	0.846138	1.15183	2252	0.00183419	111	123	115	120	84	87	89	91	89	102	87	121	66	80	82	96	46	81	59	35	36	66	54	50	64	48	46	13	31	3	21	12	11
16S_OTU00092	Bacteria	Chloroflexi	KD4-96	unclassified	unclassified	unclassified	17.276	0.250583	0.0002	0.000822403	0.0460633	-0.0460633	1.28608	0.632707	6723	0.0054757	249	288	354	232	206	132	273	275	249	178	144	132	216	180	193	148	187	115	222	202	158	179	216	319	138	176	147	121	170	90	154	110	208
16S_OTU00099	Bacteria	Bacteroidetes	Bacteroidia	Chitinophagales	Chitinophagaceae	unclassified	12.4883	0.204929	0.0002	0.000822403	0.395759	-0.395759	0.914595	0.943749	829	0.000675198	22	30	81	30	41	30	8	20	19	126	37	86	54	48	55	53	26	34	0	0	0	0	0	0	0	0	0	21	6	2	0	0	0
16S_OTU00106	Bacteria	Acidobacteria	Blastocatellia_(Subgroup_4)	45597	unclassified	unclassified	18.303	0.197788	0.0002	0.000822403	0.666525	-0.666525	0.893013	0.566194	2606	0.00212252	55	54	25	87	52	37	80	106	115	54	90	71	51	58	41	40	109	36	87	173	111	128	156	217	97	53	86	22	41	87	49	31	22
16S_OTU00154	Bacteria	Proteobacteria	Alphaproteobacteria	Rhizobiales	Xanthobacteraceae	unclassified	26.9133	0.425536	0.0002	0.000822403	-0.329444	0.329444	0.84562	1.05542	757	0.000616556	5	5	6	15	7	4	3	9	6	7	44	19	13	6	16	21	25	17	24	15	33	7	12	14	29	20	16	16	16	49	62	49	40
16S_OTU00174	Bacteria	Chloroflexi	Dehalococcoidia	S085	unclassified	unclassified	27.9951	0.239364	0.0002	0.000822403	0.312274	-0.312274	1.1001	0.801309	1002	0.000816102	4	0	0	1	0	0	0	0	0	0	10	4	0	0	0	4	8	2	37	38	28	25	77	61	9	6	3	16	28	80	111	88	87
16S_OTU00176	Bacteria	Proteobacteria	Gammaproteobacteria	Betaproteobacteriales	Rhodocyclaceae	Dechloromonas	31.6211	0.250317	0.0002	0.000822403	0.422404	-0.422404	0.993664	0.832835	710	0.000578276	6	5	9	0	0	1	8	0	0	3	2	6	0	1	3	0	0	0	38	117	55	110	63	171	28	11	38	7	17	3	1	2	1
16S_OTU00197	Bacteria	Acidobacteria	Subgroup_18	unclassified	unclassified	unclassified	21.8542	0.346161	0.0002	0.000822403	0.000218496	-0.000218496	0.830405	1.17015	345	0.000280993	1	1	1	1	0	0	1	0	1	2	2	5	3	2	4	4	5	7	17	20	14	4	12	12	18	21	14	16	17	23	23	22	23
16S_OTU00216	Bacteria	Chloroflexi	Anaerolineae	Anaerolineales	Anaerolineaceae	unclassified	18.7099	0.272585	0.0002	0.000822403	-0.0908081	0.0908081	1.15329	0.843371	1865	0.00151899	56	63	55	70	38	52	85	67	76	10	43	48	36	28	43	64	61	42	74	86	66	57	55	78	43	50	65	42	63	39	34	20	42
16S_OTU00226	Bacteria	Proteobacteria	Gammaproteobacteria	Betaproteobacteriales	SC-I-84	unclassified	30.4222	0.277683	0.0002	0.000822403	-0.00960879	0.00960879	1.18249	0.812618	824	0.000671126	4	3	5	4	8	10	0	1	4	31	31	46	20	13	21	80	12	44	31	29	53	5	4	9	14	21	26	49	89	44	24	34	27
16S_OTU00271	Bacteria	Patescibacteria	ABY1	Candidatus_Magasanikbacteria	unclassified	unclassified	29.8898	0.181856	0.0002	0.000822403	-0.000350522	0.000350522	1.04012	0.988417	364	0.000296468	58	66	45	33	49	17	10	7	9	5	1	14	15	9	12	5	1	7	0	0	0	0	0	0	0	0	0	0	0	1	0	0	0
16S_OTU00277	Bacteria	Planctomycetes	Planctomycetacia	Gemmatales	Gemmataceae	unclassified	16.1236	0.232833	0.0002	0.000822403	-0.312998	0.312998	0.675344	1.18122	681	0.000554656	2	0	1	8	4	3	3	7	3	4	8	1	2	4	2	13	11	8	31	41	28	14	33	29	15	13	16	16	19	45	59	57	34
16S_OTU00299	Bacteria	Proteobacteria	Gammaproteobacteria	unclassified	unclassified	unclassified	18.2153	0.289205	0.0002	0.000822403	0.0215743	-0.0215743	1.16753	0.833494	817	0.000665424	20	14	8	8	14	11	5	10	9	26	24	41	13	26	25	26	23	20	35	27	33	21	24	29	35	13	22	44	35	32	31	35	20
16S_OTU00374	Bacteria	Planctomycetes	Phycisphaerae	Phycisphaerales	Phycisphaeraceae	AKYG587	30.9679	0.419188	0.0002	0.000822403	-0.260376	0.260376	1.13024	0.798637	462	0.000376286	5	5	1	10	14	5	10	7	17	2	9	18	15	15	18	15	7	14	15	3	12	0	5	2	9	10	22	24	19	23	28	36	13
16S_OTU00381	Bacteria	Actinobacteria	Thermoleophilia	Gaiellales	unclassified	unclassified	19.9551	0.108676	0.0002	0.000822403	-0.283574	0.283574	0.598759	1.23694	452	0.000368142	26	22	29	47	43	38	20	16	17	26	8	11	27	25	31	9	9	14	1	4	7	3	2	2	7	3	3	1	1	0	0	0	0
16S_OTU00460	Bacteria	Acidobacteria	Subgroup_22	unclassified	unclassified	unclassified	28.2581	0.255573	0.0002	0.000822403	-0.36719	0.36719	0.716404	1.12253	1026	0.000835649	19	28	20	26	25	21	19	38	43	18	33	40	46	43	54	49	47	43	23	22	26	9	5	13	40	24	26	52	37	32	19	23	20
16S_OTU00461	Bacteria	Verrucomicrobia	Verrucomicrobiae	Pedosphaerales	Pedosphaeraceae	unclassified	15.0973	0.186469	0.0002	0.000822403	-0.394203	0.394203	0.991671	0.863908	358	0.000291581	5	3	10	8	3	2	12	13	15	6	4	4	3	2	6	1	5	4	19	26	5	16	32	44	8	14	10	9	17	7	12	6	9
16S_OTU00463	Bacteria	Acidobacteria	Subgroup_6	unclassified	unclassified	unclassified	21.6361	0.393966	0.0002	0.000822403	-0.0741745	0.0741745	1.09118	0.925475	1852	0.0015084	56	44	12	65	34	34	31	70	51	52	84	112	69	59	66	93	95	73	30	35	42	35	36	30	41	17	41	32	45	62	38	110	55
16S_OTU00489	Bacteria	Proteobacteria	Deltaproteobacteria	Myxococcales	BIrii41	unclassified	22.9224	0.138869	0.0002	0.000822403	-0.526911	0.526911	0.770877	0.936289	498	0.000405607	20	16	17	14	21	10	12	14	17	12	4	10	23	12	24	19	13	24	3	2	10	4	7	4	10	3	12	44	34	38	9	14	2
16S_OTU00493	Bacteria	Proteobacteria	Gammaproteobacteria	Betaproteobacteriales	A21b	unclassified	18.4752	0.20786	0.0002	0.000822403	0.528143	-0.528143	1.0195	0.6548	173	0.000140904	2	2	7	10	1	10	0	0	0	26	2	22	17	26	28	9	4	7	0	0	0	0	0	0	0	0	0	0	0	0	0	0	0
16S_OTU00496	Bacteria	Acidobacteria	Subgroup_22	unclassified	unclassified	unclassified	25.1765	0.388617	0.0002	0.000822403	0.208296	-0.208296	1.14356	0.811923	240	0.000195473	15	9	7	7	5	5	13	8	10	10	19	10	5	6	8	18	10	8	0	1	0	0	0	0	5	0	0	8	3	6	9	4	7
16S_OTU00522	Bacteria	Chloroflexi	Chloroflexia	Chloroflexales	Roseiflexaceae	unclassified	27.131	0.294217	0.0002	0.000822403	-0.729129	0.729129	0.467835	0.845074	1114	0.000907323	62	46	82	47	42	32	81	56	63	18	12	22	33	45	29	19	16	19	34	16	14	22	35	39	31	11	22	9	13	23	21	16	18
16S_OTU00527	Bacteria	Planctomycetes	Phycisphaerae	Tepidisphaerales	WD2101_soil_group	unclassified	13.1975	0.218037	0.0002	0.000822403	0.191006	-0.191006	1.16403	0.791577	195	0.000158822	14	22	51	8	20	13	22	7	10	13	0	1	4	3	6	0	1	0	0	0	0	0	0	0	0	0	0	0	0	0	0	0	0
16S_OTU00596	Bacteria	Proteobacteria	Gammaproteobacteria	Betaproteobacteriales	Nitrosomonadaceae	unclassified	12.9663	0.256787	0.0002	0.000822403	0.309393	-0.309393	1.21478	0.616792	260	0.000211763	1	2	0	1	2	3	0	1	2	4	23	70	13	24	12	30	9	32	0	0	2	0	0	0	4	2	1	12	10	0	0	0	0
16S_OTU00656	Bacteria	Planctomycetes	Planctomycetacia	Pirellulales	Pirellulaceae	Pirellula	19.8157	0.229629	0.0002	0.000822403	-0.00317402	0.00317402	1.01981	1.00935	999	0.000813658	3	3	3	13	8	7	10	11	6	3	18	3	12	5	6	24	18	16	53	44	47	26	36	34	44	52	43	33	37	51	60	44	44
16S_OTU00668	Bacteria	Bacteroidetes	Ignavibacteria	Kryptoniales	BSV26	unclassified	17.2445	0.172374	0.0002	0.000822403	-0.553823	0.553823	0.591103	1.02951	262	0.000213392	0	0	0	0	0	0	0	0	0	0	6	0	0	0	0	0	2	0	9	13	10	2	5	7	0	12	22	5	7	8	20	18	30
16S_OTU00682	Bacteria	Patescibacteria	Parcubacteria	unclassified	unclassified	unclassified	16.6189	0.159643	0.0002	0.000822403	0.140308	-0.140308	0.89846	1.09996	207	0.000168596	8	11	4	36	24	18	15	15	23	2	11	3	15	1	11	4	3	3	0	0	0	0	0	0	0	0	0	0	0	0	0	0	0
16S_OTU00853	Bacteria	Actinobacteria	MB-A2-108	unclassified	unclassified	unclassified	31.7817	0.0598969	0.0002	0.000822403	0.442796	-0.442796	1.19665	0.460058	295	0.000240269	1	0	0	11	15	9	50	59	73	0	4	4	2	1	3	5	16	7	1	0	0	0	1	0	0	0	3	1	1	0	3	4	2
16S_OTU00876	Bacteria	Proteobacteria	Deltaproteobacteria	Desulfuromonadales	Geobacteraceae	Geobacter	17.8138	0.120806	0.0002	0.000822403	0.391698	-0.391698	1.20724	0.525822	113	9.20354e-05	1	1	0	0	0	0	0	2	0	0	2	0	0	0	0	0	0	0	1	14	0	39	28	22	1	0	1	0	0	1	0	0	0
16S_OTU00897	Bacteria	Proteobacteria	Alphaproteobacteria	unclassified	unclassified	unclassified	19.3389	0.247587	0.0002	0.000822403	-0.037884	0.037884	1.1264	0.887136	169	0.000137646	7	4	5	2	4	4	8	4	2	5	1	7	2	7	5	5	0	2	7	4	8	9	7	6	9	14	13	1	2	2	2	1	3
16S_OTU00955	Bacteria	Chloroflexi	Anaerolineae	Anaerolineales	Anaerolineaceae	Anaerolinea	11.4422	0.111008	0.0002	0.000822403	0.0100483	-0.0100483	0.699988	1.25245	180	0.000146605	0	0	0	0	0	0	3	0	0	0	0	0	0	0	0	0	0	0	11	14	2	26	25	78	2	1	2	0	8	0	8	0	0
16S_OTU00987	Bacteria	Proteobacteria	Deltaproteobacteria	NB1-j	unclassified	unclassified	18.2968	0.258634	0.0002	0.000822403	-0.3717	0.3717	0.605797	1.1829	144	0.000117284	0	0	0	1	0	2	7	4	0	0	6	4	0	0	0	7	1	3	4	3	10	0	1	2	0	0	3	3	2	14	11	10	7
16S_OTU01197	Bacteria	Verrucomicrobia	Verrucomicrobiae	Pedosphaerales	Pedosphaeraceae	unclassified	17.668	0.208649	0.0002	0.000822403	0.544448	-0.544448	0.94218	0.737157	63	5.13118e-05	0	0	0	0	0	0	0	0	0	0	0	0	0	0	0	0	0	0	1	0	2	0	0	0	0	2	6	3	1	2	7	8	11
16S_OTU01239	Bacteria	Verrucomicrobia	Verrucomicrobiae	Pedosphaerales	Pedosphaeraceae	unclassified	23.7476	0.298105	0.0002	0.000822403	-0.398194	0.398194	0.680403	1.12254	332	0.000270405	12	10	7	18	9	7	11	13	9	10	14	14	22	18	19	28	12	18	4	2	0	8	5	12	0	0	2	3	10	4	9	3	3
16S_OTU01300	Bacteria	Acidobacteria	Acidobacteriia	Solibacterales	Solibacteraceae_(Subgroup_3)	PAUC26f	29.0215	0.0778817	0.0002	0.000822403	0.138983	-0.138983	1.28748	0.600256	45	3.66513e-05	0	0	0	1	0	0	0	0	0	0	0	0	0	0	0	0	1	0	1	0	1	0	0	1	12	13	9	0	2	4	0	0	0
16S_OTU01303	Bacteria	Chloroflexi	Chloroflexia	Chloroflexales	Roseiflexaceae	unclassified	21.4066	0.217826	0.0002	0.000822403	0.102877	-0.102877	0.773267	1.19936	118	9.61078e-05	4	2	5	7	4	5	32	10	25	0	2	1	1	2	0	1	0	1	2	0	0	9	1	1	1	1	1	0	0	0	0	0	0
16S_OTU01305	Bacteria	Gemmatimonadetes	Gemmatimonadetes	Gemmatimonadales	Gemmatimonadaceae	Gemmatimonas	16.1163	0.259504	0.0002	0.000822403	-0.447572	0.447572	0.643182	1.10496	245	0.000199546	20	12	23	34	35	8	22	18	26	21	0	3	7	3	8	0	1	2	0	0	0	0	0	0	1	1	0	0	0	0	0	0	0
16S_OTU01320	Bacteria	Actinobacteria	Thermoleophilia	Gaiellales	unclassified	unclassified	17.5684	0.247301	0.0002	0.000822403	-0.223598	0.223598	0.844715	1.11329	456	0.0003714	37	24	32	47	49	32	46	33	31	41	8	10	12	12	17	12	4	7	0	0	0	0	2	0	0	0	0	0	0	0	0	0	0
16S_OTU01399	Bacteria	Planctomycetes	Planctomycetacia	Pirellulales	Pirellulaceae	Pirellula	70.8741	0.112383	0.0002	0.000822403	-0.0616753	0.0616753	0.469172	1.35301	69	5.61986e-05	0	0	0	0	0	0	0	0	0	0	0	0	0	0	0	0	0	0	4	0	5	0	0	1	18	18	15	0	0	0	4	2	0
16S_OTU01502	Bacteria	Proteobacteria	Deltaproteobacteria	Myxococcales	BIrii41	unclassified	12.771	0.20479	0.0002	0.000822403	-0.530154	0.530154	0.643235	1.02464	135	0.000109954	4	3	0	3	4	3	2	4	3	0	6	1	4	3	6	3	7	7	0	3	0	2	1	1	3	2	1	19	11	6	5	5	5
16S_OTU01522	Bacteria	Proteobacteria	Gammaproteobacteria	Xanthomonadales	Rhodanobacteraceae	Rhodanobacter	20.2497	0.280546	0.0002	0.000822403	-0.214771	0.214771	0.841047	1.11972	81	6.59723e-05	13	5	2	9	19	6	9	7	7	4	0	0	0	0	0	0	0	0	0	0	0	0	0	0	0	0	0	0	0	0	0	0	0
16S_OTU01578	Bacteria	Planctomycetes	Planctomycetacia	Pirellulales	Pirellulaceae	unclassified	22.6161	0.305919	0.0002	0.000822403	-0.150914	0.150914	0.899044	1.0965	106	8.63341e-05	1	1	2	3	0	3	0	5	5	4	3	13	2	6	6	13	6	13	1	0	1	0	0	0	0	2	1	3	4	4	2	0	1
16S_OTU01605	Bacteria	Chloroflexi	Chloroflexia	Thermomicrobiales	JG30-KF-CM45	unclassified	14.2175	0.0660827	0.0002	0.000822403	0.273615	-0.273615	0.995939	0.953096	95	7.73749e-05	0	0	0	0	0	0	1	1	0	0	0	0	0	0	0	0	1	0	1	0	0	0	0	0	16	36	26	0	0	0	3	1	0
16S_OTU01622	Bacteria	Bacteroidetes	Bacteroidia	Chitinophagales	Chitinophagaceae	unclassified	14.9089	0.176717	0.0002	0.000822403	0.287827	-0.287827	1.24224	0.583293	114	9.28499e-05	4	3	8	3	2	3	2	6	7	12	15	9	4	8	7	5	4	9	0	0	0	2	1	0	0	0	0	0	0	0	0	0	0
16S_OTU01697	Bacteria	Proteobacteria	Gammaproteobacteria	Xanthomonadales	Xanthomonadaceae	Arenimonas	20.9397	0.192701	0.0002	0.000822403	-0.281118	0.281118	0.948517	0.995885	127	0.000103438	8	13	12	0	0	2	1	0	2	9	6	5	7	11	19	5	5	6	0	0	0	0	0	0	0	0	2	4	2	7	0	1	0
16S_OTU01706	Bacteria	Chloroflexi	Anaerolineae	SBR1031	unclassified	unclassified	11.652	0.102069	0.0002	0.000822403	0.266098	-0.266098	0.986887	0.966918	141	0.000114841	5	10	1	4	6	3	1	5	9	6	0	5	32	16	18	6	9	5	0	0	0	0	0	0	0	0	0	0	0	0	0	0	0
16S_OTU01752	Bacteria	Planctomycetes	OM190	unclassified	unclassified	unclassified	18.1087	0.152375	0.0002	0.000822403	-0.338569	0.338569	0.879668	1.02091	79	6.43434e-05	0	0	0	0	0	0	1	1	0	0	2	2	0	0	0	0	1	0	7	7	2	3	2	0	0	0	1	0	3	2	10	7	4
16S_OTU01790	Bacteria	Verrucomicrobia	Verrucomicrobiae	Pedosphaerales	Pedosphaeraceae	unclassified	18.4835	0.210623	0.0002	0.000822403	-0.030398	0.030398	1.12038	0.895329	68	5.53842e-05	3	0	0	8	6	5	5	2	3	0	0	1	1	0	0	6	1	2	1	1	1	4	1	4	1	3	3	0	0	0	2	1	2
16S_OTU01918	Bacteria	Proteobacteria	Alphaproteobacteria	Rhizobiales	A0839	unclassified	25.9269	0.386191	0.0002	0.000822403	-0.346037	0.346037	0.690505	1.15259	101	8.22618e-05	0	1	0	1	7	1	1	2	3	0	5	3	2	3	0	7	4	9	1	1	0	1	0	0	1	0	0	4	1	6	10	7	1
16S_OTU01952	Bacteria	Planctomycetes	Phycisphaerae	Tepidisphaerales	WD2101_soil_group	unclassified	18.5763	0.214217	0.0002	0.000822403	-0.488719	0.488719	0.449199	1.16243	160	0.000130316	5	5	3	8	3	10	6	2	2	1	1	3	6	1	1	5	4	6	13	7	2	15	8	17	3	4	3	2	2	2	3	2	2
16S_OTU02150	Bacteria	Planctomycetes	Phycisphaerae	Tepidisphaerales	WD2101_soil_group	unclassified	15.297	0.130213	0.0002	0.000822403	-0.549278	0.549278	0.492563	1.08503	72	5.8642e-05	0	0	0	0	0	0	0	0	0	0	0	0	0	0	0	0	0	0	4	6	2	0	0	1	3	1	1	1	0	2	11	6	2
16S_OTU02166	Bacteria	Proteobacteria	Alphaproteobacteria	Rhizobiales	Rhizobiales_Incertae_Sedis	unclassified	20.5676	0.283931	0.0002	0.000822403	0.0420987	-0.0420987	0.906042	1.11093	101	8.22618e-05	0	0	0	1	0	2	0	0	1	0	1	0	1	0	0	2	0	0	2	4	4	0	2	0	0	1	2	2	2	13	15	9	8
16S_OTU02168	Bacteria	Verrucomicrobia	Verrucomicrobiae	Chthoniobacterales	Chthoniobacteraceae	Candidatus_Udaeobacter	17.1354	0.0850096	0.0002	0.000822403	0.314999	-0.314999	0.94528	0.977317	93	7.5746e-05	1	1	0	4	13	6	0	2	1	0	0	0	16	11	15	6	5	12	0	0	0	0	0	0	0	0	0	0	0	0	0	0	0
16S_OTU02173	Bacteria	Planctomycetes	Phycisphaerae	Phycisphaerales	Phycisphaeraceae	AKYG587	23.1801	0.192425	0.0002	0.000822403	0.22753	-0.22753	0.986863	0.987569	72	5.8642e-05	0	0	0	0	0	0	0	0	0	0	0	0	0	0	0	0	0	0	3	4	3	2	3	1	0	0	0	2	1	2	15	5	7
16S_OTU02182	Bacteria	Actinobacteria	Actinobacteria	unclassified	unclassified	unclassified	16.3359	0.244948	0.0002	0.000822403	0.504388	-0.504388	1.09601	0.564657	43	3.50223e-05	4	9	4	2	5	7	3	3	1	2	0	0	1	0	0	0	0	0	0	0	1	0	0	0	0	0	0	1	0	0	0	0	0
16S_OTU02191	Bacteria	Verrucomicrobia	Verrucomicrobiae	Pedosphaerales	Pedosphaeraceae	unclassified	16.8931	0.185196	0.0002	0.000822403	-0.499654	0.499654	0.450766	1.15194	56	4.56105e-05	0	0	0	0	0	0	0	0	0	0	0	0	0	0	0	0	0	0	0	0	0	1	0	4	0	0	0	0	1	3	9	7	2
16S_OTU02206	Bacteria	Proteobacteria	Gammaproteobacteria	Diplorickettsiales	Diplorickettsiaceae	Aquicella	18.4503	0.218192	0.0002	0.000822403	0.241338	-0.241338	1.30706	0.476536	86	7.00447e-05	12	8	14	1	2	3	11	4	1	2	1	0	1	0	1	0	1	0	3	1	6	0	0	2	1	1	1	1	0	1	2	1	3
16S_OTU02254	Bacteria	Chloroflexi	Anaerolineae	unclassified	unclassified	unclassified	25.8952	0.224668	0.0002	0.000822403	-0.193415	0.193415	1.12046	0.850983	39	3.17644e-05	0	0	0	0	0	0	0	0	0	0	0	0	0	0	0	0	0	0	1	0	1	0	0	0	1	1	1	0	1	2	9	3	6
16S_OTU02267	Bacteria	Proteobacteria	Deltaproteobacteria	Myxococcales	Sandaracinaceae	unclassified	16.7226	0.267066	0.0002	0.000822403	0.39592	-0.39592	0.684853	1.12154	86	7.00447e-05	0	0	1	3	1	0	0	1	1	3	9	6	1	1	0	8	2	5	0	3	0	1	2	1	2	4	2	3	4	8	1	3	5
16S_OTU02395	Bacteria	Patescibacteria	Parcubacteria	Candidatus_Adlerbacteria	unclassified	unclassified	21.7958	0.300168	0.0002	0.000822403	-0.107118	0.107118	0.929683	1.08176	30	2.44342e-05	3	5	3	4	3	2	2	0	5	1	0	1	0	0	1	0	0	0	0	0	0	0	0	0	0	0	0	0	0	0	0	0	0
16S_OTU02435	Bacteria	Planctomycetes	Phycisphaerae	Tepidisphaerales	WD2101_soil_group	unclassified	18.9424	0.294172	0.0002	0.000822403	0.109084	-0.109084	1.32319	0.531777	68	5.53842e-05	4	11	14	2	9	2	6	1	6	1	0	0	2	0	2	1	1	0	2	1	1	0	0	1	0	0	1	0	0	0	0	0	0
16S_OTU02465	Bacteria	Patescibacteria	Parcubacteria	Candidatus_Nomurabacteria	unclassified	unclassified	20.5757	0.268095	0.0002	0.000822403	-0.0101051	0.0101051	0.930534	1.09211	64	5.21263e-05	0	1	2	2	2	1	2	3	4	0	2	4	7	3	5	6	7	3	0	0	0	0	0	0	0	0	1	2	4	1	1	1	0
16S_OTU02549	Bacteria	Planctomycetes	Phycisphaerae	CCM11a	unclassified	unclassified	23.1808	0.141123	0.0002	0.000822403	0.114924	-0.114924	0.840015	1.15119	82	6.67868e-05	0	0	0	0	0	0	0	0	0	0	0	0	0	0	0	0	0	0	1	2	1	0	1	0	3	2	8	0	0	0	16	9	9
16S_OTU02722	Bacteria	Proteobacteria	Gammaproteobacteria	Diplorickettsiales	Diplorickettsiaceae	Aquicella	15.4928	0.308984	0.0002	0.000822403	-0.154078	0.154078	1.18274	0.780816	50	4.07236e-05	3	4	2	3	6	2	10	3	3	0	2	0	0	0	0	0	2	0	0	1	2	1	2	0	2	0	0	1	1	0	0	0	0
16S_OTU02786	Bacteria	Planctomycetes	Planctomycetacia	Gemmatales	Gemmataceae	unclassified	27.8464	0.120869	0.0002	0.000822403	0.118006	-0.118006	1.01619	0.998345	22	1.79184e-05	0	0	0	0	1	0	0	0	0	0	0	0	1	0	0	4	4	6	0	0	0	0	0	0	0	1	1	1	2	0	0	1	0
16S_OTU02831	Bacteria	Acidobacteria	Subgroup_6	unclassified	unclassified	unclassified	18.9818	0.169317	0.0002	0.000822403	0.463773	-0.463773	1.02976	0.736841	120	9.77367e-05	13	27	22	10	9	5	5	2	1	10	0	1	2	1	5	0	0	0	0	1	0	1	2	2	0	0	0	0	1	0	0	0	0
16S_OTU02952	Bacteria	Proteobacteria	Gammaproteobacteria	Betaproteobacteriales	unclassified	unclassified	17.6462	0.0909995	0.0002	0.000822403	-0.193914	0.193914	0.861225	1.11242	150	0.000122171	5	7	12	11	9	6	1	0	1	17	5	13	16	19	25	1	1	1	0	0	0	0	0	0	0	0	0	0	0	0	0	0	0
16S_OTU03018	Bacteria	Proteobacteria	Gammaproteobacteria	Betaproteobacteriales	Rhodocyclaceae	Candidatus_Accumulibacter	19.4081	0.174699	0.0002	0.000822403	-0.244703	0.244703	0.922867	1.03939	117	9.52933e-05	12	16	7	0	0	1	4	1	3	4	0	1	1	1	7	0	0	0	3	4	7	8	7	16	1	1	0	1	5	1	2	0	1
16S_OTU03066	Bacteria	Planctomycetes	Phycisphaerae	Tepidisphaerales	CPla-3_termite_group	unclassified	18.3317	0.271105	0.0002	0.000822403	-0.112332	0.112332	0.395589	1.36953	90	7.33026e-05	9	8	6	5	12	7	4	10	8	4	1	7	3	2	2	1	0	0	0	0	0	1	0	0	0	0	0	0	0	0	0	0	0
16S_OTU03101	Bacteria	unclassified	unclassified	unclassified	unclassified	unclassified	25.9951	0.410299	0.0002	0.000822403	-0.397537	0.397537	0.543448	1.19533	37	3.01355e-05	0	3	0	4	4	1	5	3	2	0	0	0	0	0	0	0	0	0	2	3	0	2	1	1	1	2	0	0	1	0	1	1	0
16S_OTU03114	Bacteria	Acidobacteria	Subgroup_6	unclassified	unclassified	unclassified	18.9982	0.142245	0.0002	0.000822403	0.213412	-0.213412	1.26066	0.610838	41	3.33934e-05	0	1	1	0	0	0	0	1	1	0	0	0	0	0	0	0	0	0	2	3	0	0	0	1	0	0	0	0	0	1	6	7	3
16S_OTU03141	Bacteria	Patescibacteria	Parcubacteria	Candidatus_Kaiserbacteria	unclassified	unclassified	26.6831	0.465328	0.0002	0.000822403	-0.0335472	0.0335472	0.636062	1.28525	92	7.49315e-05	1	0	0	0	0	0	1	3	2	2	8	3	0	6	1	8	5	6	1	1	2	0	0	0	2	0	0	2	1	7	6	4	4
16S_OTU03148	Bacteria	Acidobacteria	Subgroup_6	unclassified	unclassified	unclassified	13.7243	0.180406	0.0002	0.000822403	0.109576	-0.109576	1.09865	0.909046	29	2.36197e-05	0	0	0	1	0	0	1	2	0	0	1	1	0	0	0	2	1	0	0	0	1	1	0	1	0	0	0	2	3	5	1	2	2
16S_OTU03201	Bacteria	Latescibacteria	unclassified	unclassified	unclassified	unclassified	14.604	0.199275	0.0002	0.000822403	-0.0884395	0.0884395	0.931764	1.08355	24	1.95473e-05	0	0	0	0	0	0	0	0	0	0	1	0	0	0	0	0	0	0	1	0	0	0	1	0	0	0	0	0	2	0	4	3	1
16S_OTU03252	Bacteria	Proteobacteria	Deltaproteobacteria	Myxococcales	Haliangiaceae	Haliangium	21.5676	0.292835	0.0002	0.000822403	-0.397307	0.397307	0.779153	1.0571	104	8.47052e-05	0	0	0	0	1	0	1	0	2	0	1	0	0	0	0	0	0	0	1	2	1	0	2	0	0	0	0	3	18	18	7	7	11
16S_OTU03310	Bacteria	Verrucomicrobia	Verrucomicrobiae	Chthoniobacterales	Chthoniobacteraceae	Chthoniobacter	18.3267	0.217368	0.0002	0.000822403	0.490608	-0.490608	0.999028	0.742332	29	2.36197e-05	0	0	0	0	0	1	0	1	0	0	4	2	1	0	2	3	5	6	1	0	0	0	0	0	0	0	0	2	1	0	0	0	0
16S_OTU03315	Bacteria	Planctomycetes	Planctomycetacia	Gemmatales	Gemmataceae	unclassified	21.3742	0.318614	0.0002	0.000822403	0.328967	-0.328967	1.17634	0.66774	29	2.36197e-05	0	0	0	0	0	0	0	0	0	0	0	0	2	0	1	1	1	0	0	1	1	0	0	0	1	0	0	0	1	2	5	1	4
16S_OTU03371	Bacteria	Chloroflexi	Anaerolineae	SBR1031	unclassified	unclassified	23.7868	0.284787	0.0002	0.000822403	-0.15897	0.15897	0.788997	1.17592	61	4.96828e-05	0	0	0	0	0	0	0	0	0	0	0	0	0	0	0	0	0	1	2	1	1	0	3	0	2	2	2	4	11	7	4	5	4
16S_OTU03433	Bacteria	Proteobacteria	Gammaproteobacteria	Betaproteobacteriales	Burkholderiaceae	Massilia	14.5473	0.203045	0.0002	0.000822403	0.326655	-0.326655	1.01819	0.892272	294	0.000239455	12	3	10	89	42	9	38	47	26	0	2	1	0	1	2	2	2	1	0	0	0	2	1	0	0	1	0	1	2	0	0	0	0
16S_OTU03498	Bacteria	unclassified	unclassified	unclassified	unclassified	unclassified	11.6987	0.240872	0.0002	0.000822403	0.201995	-0.201995	1.16069	0.790713	26	2.11763e-05	4	1	2	1	2	7	3	3	2	0	0	0	0	0	0	0	0	0	0	0	0	0	0	1	0	0	0	0	0	0	0	0	0
16S_OTU03511	Bacteria	Planctomycetes	Planctomycetacia	Pirellulales	Pirellulaceae	unclassified	16.5397	0.312813	0.0002	0.000822403	0.464259	-0.464259	0.876424	0.913386	59	4.80539e-05	2	5	4	8	2	3	4	4	5	0	0	1	1	0	2	2	1	4	3	1	1	1	0	1	2	0	0	0	0	0	0	1	0
16S_OTU03579	Bacteria	Planctomycetes	Planctomycetacia	Pirellulales	Pirellulaceae	Pirellula	17.6119	0.261658	0.0002	0.000822403	-0.21701	0.21701	0.456137	1.32327	33	2.68776e-05	1	0	1	0	1	0	0	2	1	0	2	0	4	4	3	1	0	2	0	0	0	0	0	0	1	0	0	2	0	2	0	1	2
16S_OTU03614	Bacteria	Proteobacteria	Deltaproteobacteria	Myxococcales	Haliangiaceae	Haliangium	23.6028	0.274886	0.0002	0.000822403	0.116164	-0.116164	1.10151	0.903844	144	0.000117284	3	1	2	2	4	2	5	2	8	1	5	1	3	2	2	13	9	10	2	4	3	1	2	2	2	1	1	5	3	7	7	8	6
16S_OTU03618	Bacteria	Chloroflexi	unclassified	unclassified	unclassified	unclassified	17.7741	0.225944	0.0002	0.000822403	0.366551	-0.366551	0.941824	0.941947	23	1.87329e-05	0	0	0	0	0	0	0	0	0	0	0	0	0	0	0	0	0	0	0	0	0	0	1	1	0	0	0	0	2	1	1	2	5
16S_OTU03645	Bacteria	Verrucomicrobia	Verrucomicrobiae	Pedosphaerales	Pedosphaeraceae	unclassified	17.5921	0.227284	0.0002	0.000822403	0.612886	-0.612886	0.900165	0.673111	41	3.33934e-05	1	0	2	0	0	1	0	1	1	4	5	10	3	2	4	1	0	5	0	0	0	0	0	0	0	0	0	0	0	0	0	0	0
16S_OTU03786	Bacteria	Proteobacteria	Deltaproteobacteria	Myxococcales	bacteriap25	unclassified	11.9537	0.1311	0.0002	0.000822403	0.494004	-0.494004	1.07861	0.615326	20	1.62895e-05	0	0	0	0	0	0	0	0	0	0	2	1	0	0	0	0	0	0	1	1	1	0	0	0	0	0	0	1	0	1	1	0	0
16S_OTU03803	Bacteria	Acidobacteria	Acidobacteriia	Solibacterales	Solibacteraceae_(Subgroup_3)	Elev-16S-1166	18.9558	0.320137	0.0002	0.000822403	0.407743	-0.407743	0.980709	0.863114	86	7.00447e-05	6	1	0	7	4	0	2	1	2	2	6	5	8	4	10	6	3	9	0	0	0	0	0	0	0	0	0	3	2	3	1	0	0
16S_OTU03805	Bacteria	Actinobacteria	Actinobacteria	Propionibacteriales	Propionibacteriaceae	unclassified	23.706	0.293052	0.0002	0.000822403	-0.0571186	0.0571186	0.875654	1.13364	25	2.03618e-05	0	0	0	0	0	0	0	0	0	0	0	0	0	0	0	0	0	0	0	0	0	0	2	2	0	0	0	1	3	3	4	1	3
16S_OTU03817	Bacteria	Chloroflexi	Anaerolineae	SBR1031	A4b	unclassified	16.4658	0.224132	0.0002	0.000822403	-0.123708	0.123708	1.22426	0.726364	34	2.76921e-05	0	0	0	1	0	0	0	0	0	0	1	1	1	0	0	1	1	4	1	3	0	0	0	0	0	1	1	0	1	0	2	2	3
16S_OTU03926	Bacteria	Patescibacteria	Saccharimonadia	Saccharimonadales	unclassified	unclassified	18.6307	0.228637	0.0002	0.000822403	0.44934	-0.44934	0.822345	0.977244	61	4.96828e-05	1	0	1	0	3	0	0	2	2	0	2	3	7	5	1	14	4	9	0	0	0	0	0	0	0	0	0	1	3	3	0	0	0
16S_OTU03933	Bacteria	Patescibacteria	Parcubacteria	unclassified	unclassified	unclassified	20.2424	0.37083	0.0002	0.000822403	0.392337	-0.392337	1.1641	0.614596	177	0.000144162	5	8	0	1	1	3	1	9	5	6	2	8	9	10	3	17	6	10	1	1	6	4	0	0	2	1	1	6	8	13	6	2	5
16S_OTU03938	Bacteria	Verrucomicrobia	Verrucomicrobiae	Pedosphaerales	Pedosphaeraceae	Pedosphaera	18.1452	0.220426	0.0002	0.000822403	0.332451	-0.332451	1.11771	0.758614	32	2.60631e-05	2	2	4	1	2	1	2	1	2	1	0	0	1	1	1	0	0	1	3	1	3	0	1	0	0	0	0	1	0	1	0	0	0
16S_OTU04013	Bacteria	Acidobacteria	Subgroup_6	unclassified	unclassified	unclassified	23.9913	0.154347	0.0002	0.000822403	-0.0751802	0.0751802	0.861839	1.14197	1630	0.00132759	12	6	7	5	5	6	19	13	9	13	56	23	5	4	8	20	13	17	75	84	82	53	71	56	67	51	77	118	152	115	70	89	63
16S_OTU04042	Bacteria	Chloroflexi	Ktedonobacteria	C0119	unclassified	unclassified	17.3717	0.285455	0.0002	0.000822403	0.443568	-0.443568	1.20776	0.428362	41	3.33934e-05	4	7	5	2	4	1	4	6	1	4	0	0	0	0	0	0	0	0	1	0	0	1	1	0	0	0	0	0	0	0	0	0	0
16S_OTU04083	Bacteria	Patescibacteria	Saccharimonadia	Saccharimonadales	unclassified	unclassified	28.721	0.339278	0.0002	0.000822403	0.307895	-0.307895	1.19701	0.652105	76	6.18999e-05	5	2	8	12	14	4	8	8	2	0	4	0	0	0	0	0	0	0	0	0	0	4	4	1	0	0	0	0	0	0	0	0	0
16S_OTU04207	Bacteria	Planctomycetes	Planctomycetacia	Planctomycetales	unclassified	unclassified	18.8794	0.307915	0.0002	0.000822403	0.260783	-0.260783	0.873752	1.07302	39	3.17644e-05	0	0	0	1	0	0	0	0	2	2	0	1	3	6	1	4	4	4	0	0	0	1	0	1	0	0	0	0	2	0	0	1	2
16S_OTU04208	Bacteria	Planctomycetes	Planctomycetacia	Gemmatales	Gemmataceae	unclassified	18.5539	0.226931	0.0002	0.000822403	-0.183472	0.183472	0.951485	1.0403	37	3.01355e-05	0	0	0	1	0	0	0	0	0	0	3	0	0	0	1	0	0	0	0	0	0	0	1	0	0	0	0	1	0	2	8	1	1
16S_OTU04306	Bacteria	Bacteroidetes	Bacteroidia	Sphingobacteriales	unclassified	unclassified	19.5268	0.27636	0.0002	0.000822403	-0.0232172	0.0232172	1.04565	0.981988	49	3.99092e-05	9	4	8	0	0	0	6	1	1	0	2	0	0	0	1	0	0	0	1	2	4	5	0	3	0	1	1	0	0	0	0	0	0
16S_OTU04310	Bacteria	Chloroflexi	Chloroflexia	Kallotenuales	AKIW781	unclassified	7.08895	0.152287	0.0002	0.000822403	0.733635	-0.733635	0.771656	0.568867	38	3.095e-05	1	1	0	16	2	2	3	4	0	0	0	0	0	0	0	0	0	0	1	0	0	2	1	4	0	0	0	0	0	0	0	0	1
16S_OTU04397	Bacteria	Planctomycetes	Planctomycetacia	Gemmatales	Gemmataceae	unclassified	19.4787	0.304264	0.0002	0.000822403	-0.500315	0.500315	0.625701	1.06642	25	2.03618e-05	0	0	0	0	0	0	0	0	0	0	1	2	1	0	0	0	1	1	0	0	1	0	0	0	0	0	0	0	1	4	2	0	1
16S_OTU04465	Bacteria	Chloroflexi	Anaerolineae	RBG-13-54-9	unclassified	unclassified	14.1271	0.251395	0.0002	0.000822403	-0.507742	0.507742	0.711045	1.00365	49	3.99092e-05	0	0	0	0	0	0	0	0	0	0	0	0	0	0	0	0	0	0	4	0	0	1	2	1	1	0	1	4	1	5	6	4	3
16S_OTU04652	Bacteria	Acidobacteria	Subgroup_6	unclassified	unclassified	unclassified	22.6381	0.23526	0.0002	0.000822403	0.449568	-0.449568	1.01739	0.771843	131	0.000106696	16	17	10	3	3	6	11	11	7	2	7	3	3	5	5	1	0	1	5	4	2	1	0	1	0	2	0	1	0	1	1	0	1
16S_OTU05252	Bacteria	Verrucomicrobia	Verrucomicrobiae	Pedosphaerales	Pedosphaeraceae	unclassified	23.9741	0.303994	0.0002	0.000822403	0.194938	-0.194938	1.0539	0.931478	53	4.31671e-05	4	7	9	3	5	4	3	4	5	3	0	0	1	0	3	0	0	2	0	0	0	0	0	0	0	0	0	0	0	0	0	0	0
16S_OTU05267	Bacteria	Patescibacteria	Saccharimonadia	Saccharimonadales	unclassified	unclassified	20.4904	0.277202	0.0002	0.000822403	-0.0981634	0.0981634	1.01659	1.00248	36	2.9321e-05	1	2	3	1	0	1	3	0	0	0	0	0	0	0	0	0	0	0	8	4	3	2	2	1	0	0	2	0	3	0	0	0	0
16S_OTU05472	Bacteria	Acidobacteria	Holophagae	Subgroup_7	unclassified	unclassified	20.6786	0.270692	0.0002	0.000822403	0.132289	-0.132289	0.789524	1.18255	50	4.07236e-05	0	0	0	0	0	0	0	0	0	0	2	0	0	0	0	0	1	0	2	0	4	0	0	1	0	1	0	0	3	6	3	5	3
16S_OTU05473	Bacteria	Proteobacteria	Alphaproteobacteria	Sphingomonadales	Sphingomonadaceae	unclassified	20.7767	0.387944	0.0002	0.000822403	-0.491124	0.491124	0.78029	0.969118	49	3.99092e-05	1	1	0	4	1	2	3	2	4	0	0	0	2	0	1	0	0	1	5	0	3	4	1	2	2	6	2	0	0	0	0	0	2
16S_OTU05568	Bacteria	Planctomycetes	Planctomycetacia	Gemmatales	Gemmataceae	Fimbriiglobus	15.7395	0.153149	0.0002	0.000822403	0.354616	-0.354616	1.28505	0.375727	31	2.52487e-05	0	0	0	0	0	0	0	0	0	0	0	0	2	0	0	0	0	0	0	0	0	0	0	0	0	3	1	0	1	1	3	1	2
16S_OTU05655	Bacteria	Patescibacteria	Gracilibacteria	Candidatus_Peribacteria	unclassified	unclassified	22.4335	0.261287	0.0002	0.000822403	0.573256	-0.573256	1.00259	0.598101	56	4.56105e-05	3	0	0	0	1	1	1	0	4	1	0	0	2	5	2	2	1	2	0	2	0	0	0	0	1	0	0	1	1	2	4	4	0
16S_OTU05964	Bacteria	Actinobacteria	MB-A2-108	unclassified	unclassified	unclassified	21.0426	0.351307	0.0002	0.000822403	-0.248075	0.248075	0.85534	1.09403	39	3.17644e-05	0	0	0	0	0	0	0	0	0	0	2	3	0	3	0	0	0	0	2	0	0	0	0	2	0	0	0	2	2	1	5	3	3
16S_OTU06042	Bacteria	unclassified	unclassified	unclassified	unclassified	unclassified	22.4549	0.254429	0.0002	0.000822403	-0.327621	0.327621	0.907995	1.00353	29	2.36197e-05	2	2	3	4	3	4	4	0	4	0	0	0	0	1	1	0	0	0	0	0	0	0	0	0	0	0	0	1	0	0	0	0	0
16S_OTU06174	Bacteria	Proteobacteria	Gammaproteobacteria	Betaproteobacteriales	Nitrosomonadaceae	MND1	30.0977	0.434323	0.0002	0.000822403	-0.39359	0.39359	0.642309	1.14813	174	0.000141718	4	5	0	0	4	2	3	4	11	2	14	15	14	11	16	17	11	7	0	0	3	1	1	0	1	0	2	1	3	7	2	4	1
16S_OTU06403	Bacteria	Acidobacteria	Subgroup_6	unclassified	unclassified	unclassified	15.3704	0.109901	0.0002	0.000822403	-0.014518	0.014518	1.0534	0.974023	385	0.000313572	11	11	13	12	6	7	8	9	10	8	15	12	25	14	26	16	13	15	14	13	15	13	1	5	3	4	4	29	23	18	2	5	2
16S_OTU06580	Bacteria	Acidobacteria	Blastocatellia_(Subgroup_4)	Blastocatellales	Blastocatellaceae	JGI_0001001-H03	19.6406	0.335748	0.0002	0.000822403	-0.111846	0.111846	1.00754	1.00856	80	6.51578e-05	0	0	0	0	0	0	0	0	0	1	5	1	1	1	0	0	0	1	3	0	3	1	1	2	0	2	1	4	3	7	5	11	3
16S_OTU07067	Bacteria	Patescibacteria	Parcubacteria	Candidatus_Nomurabacteria	unclassified	unclassified	12.7381	0.208	0.0002	0.000822403	0.335662	-0.335662	0.805378	1.0824	31	2.52487e-05	0	0	0	1	0	0	0	0	0	0	0	0	1	0	0	9	5	1	0	0	0	0	0	0	0	0	0	0	0	3	4	1	0
16S_OTU07823	Bacteria	Proteobacteria	Gammaproteobacteria	Betaproteobacteriales	SC-I-84	unclassified	28.6326	0.306408	0.0002	0.000822403	-0.472494	0.472494	0.548727	1.13356	33	2.68776e-05	0	1	0	1	0	1	0	0	0	1	1	2	1	2	3	6	3	5	0	0	0	0	0	0	0	0	0	1	0	4	0	1	0
16S_OTU07839	Bacteria	Bacteroidetes	Bacteroidia	Chitinophagales	Chitinophagaceae	Flavisolibacter	32.5137	0.225266	0.0002	0.000822403	0.346977	-0.346977	1.23816	0.520406	291	0.000237012	3	0	3	4	0	0	11	3	3	0	5	1	0	0	0	0	0	0	27	52	12	53	30	66	2	4	4	3	2	0	1	1	1
16S_OTU08075	Bacteria	Verrucomicrobia	Verrucomicrobiae	Pedosphaerales	Pedosphaeraceae	unclassified	21.8965	0.287547	0.0002	0.000822403	0.361607	-0.361607	1.07212	0.795287	91	7.4117e-05	0	0	0	4	0	0	0	0	0	0	3	6	0	0	0	5	2	3	0	3	4	0	0	0	4	5	6	5	2	4	7	5	5
16S_OTU08290	Bacteria	Verrucomicrobia	Verrucomicrobiae	Opitutales	Opitutaceae	Opitutus	15.4892	0.258848	0.0002	0.000822403	-0.168745	0.168745	0.968941	1.02941	556	0.000452847	29	25	35	29	26	10	34	35	29	20	14	19	7	20	10	16	11	10	16	2	8	31	22	13	7	16	4	6	15	8	7	4	4
16S_OTU08951	Bacteria	Patescibacteria	Parcubacteria	Candidatus_Lloydbacteria	unclassified	unclassified	10.8593	0.162455	0.0002	0.000822403	0.348704	-0.348704	0.78714	1.08708	18	1.46605e-05	0	0	0	1	1	0	0	0	1	0	2	1	5	2	2	0	1	1	0	0	0	0	0	0	0	0	0	1	0	0	0	0	0
16S_OTU09251	Bacteria	Bacteroidetes	Bacteroidia	Chitinophagales	Chitinophagaceae	Dinghuibacter	25.4279	0.272142	0.0002	0.000822403	-0.154255	0.154255	0.734284	1.21213	56	4.56105e-05	0	0	0	0	0	0	0	0	0	0	5	5	0	1	0	5	0	4	0	0	0	0	2	2	0	0	0	8	5	10	0	1	1
16S_OTU09438	Bacteria	Proteobacteria	Alphaproteobacteria	Reyranellales	Reyranellaceae	Reyranella	17.815	0.291372	0.0002	0.000822403	-0.4066	0.4066	0.710755	1.09707	246	0.00020036	20	23	41	15	21	9	10	14	27	17	1	5	9	1	8	4	3	5	0	0	2	4	0	2	3	0	1	1	0	0	0	0	0
16S_OTU09527	Bacteria	Bacteroidetes	Bacteroidia	Sphingobacteriales	Sphingobacteriaceae	Pedobacter	8.45529	0.114323	0.0002	0.000822403	0.235527	-0.235527	1.26956	0.574076	111	9.04065e-05	0	0	0	1	1	1	0	0	1	0	0	0	0	0	0	0	0	0	8	5	3	29	11	16	4	7	1	0	4	3	4	2	3
16S_OTU09532	Bacteria	Verrucomicrobia	Verrucomicrobiae	Opitutales	Opitutaceae	Opitutus	48.2645	0.344481	0.0002	0.000822403	0.56763	-0.56763	1.0705	0.480156	557	0.000453661	40	38	51	25	29	13	43	32	42	21	18	19	10	20	12	15	17	9	5	4	2	25	17	20	3	2	4	7	0	3	3	0	3
16S_OTU09544	Bacteria	Planctomycetes	Phycisphaerae	Phycisphaerales	Phycisphaeraceae	unclassified	24.2695	0.26398	0.0002	0.000822403	0.515953	-0.515953	0.972543	0.741115	29	2.36197e-05	1	1	1	1	2	0	0	0	1	0	0	0	0	0	0	0	0	0	2	5	3	1	3	3	0	0	1	0	0	0	2	1	1
16S_OTU00050	Bacteria	Chloroflexi	Anaerolineae	SBR1031	unclassified	unclassified	22.3464	0.254686	0.0003	0.00112994	0.312496	-0.312496	1.30416	0.388822	976	0.000794926	6	1	0	33	26	33	40	42	66	6	44	32	28	23	20	65	41	54	11	18	19	9	13	10	17	7	12	11	17	39	61	53	28
16S_OTU00122	Bacteria	Acidobacteria	Blastocatellia_(Subgroup_4)	Blastocatellales	Blastocatellaceae	unclassified	18.3261	0.211019	0.0003	0.00112994	-0.53246	0.53246	0.64437	1.02139	494	0.00040235	34	27	9	49	22	27	52	54	88	4	36	14	15	3	11	13	10	10	1	0	5	0	0	1	1	3	5	0	0	0	0	0	0
16S_OTU00201	Bacteria	Proteobacteria	Alphaproteobacteria	Caulobacterales	Caulobacteraceae	Phenylobacterium	17.918	0.379141	0.0003	0.00112994	-0.409372	0.409372	0.661622	1.12525	1143	0.000930942	17	21	48	33	23	19	36	29	35	26	37	40	37	30	25	33	34	45	37	28	38	24	23	26	27	27	32	32	59	22	37	36	37
16S_OTU00233	Bacteria	Verrucomicrobia	Verrucomicrobiae	Chthoniobacterales	Chthoniobacteraceae	Chthoniobacter	22.0628	0.217782	0.0003	0.00112994	-0.21227	0.21227	0.854962	1.11016	615	0.000500901	0	0	1	8	4	14	17	31	19	4	18	12	9	2	7	25	11	35	7	9	35	12	5	6	14	17	17	42	51	47	19	42	25
16S_OTU00253	Bacteria	Acidobacteria	Subgroup_6	unclassified	unclassified	unclassified	16.2813	0.33349	0.0003	0.00112994	-0.208574	0.208574	1.06588	0.911377	5681	0.00462702	140	160	132	194	159	171	173	221	257	147	226	188	201	157	197	200	271	165	121	118	161	91	106	85	139	80	106	118	140	142	131	205	161
16S_OTU00430	Bacteria	Chloroflexi	Anaerolineae	Anaerolineales	Anaerolineaceae	unclassified	17.5856	0.160216	0.0003	0.00112994	-0.0439575	0.0439575	1.02804	0.998937	424	0.000345336	1	0	0	5	4	1	3	15	10	1	5	0	0	1	0	2	1	1	8	8	39	3	11	3	6	9	6	10	7	16	37	30	54
16S_OTU00437	Bacteria	Proteobacteria	Deltaproteobacteria	Myxococcales	BIrii41	unclassified	19.4099	0.279718	0.0003	0.00112994	-0.441089	0.441089	0.98395	0.823807	478	0.000389318	23	22	27	11	15	11	14	13	13	36	14	17	22	25	16	29	31	37	12	7	12	3	2	1	0	1	1	4	21	3	4	5	4
16S_OTU00481	Bacteria	Bacteroidetes	Bacteroidia	Chitinophagales	Chitinophagaceae	Ferruginibacter	27.5195	0.121909	0.0003	0.00112994	0.393859	-0.393859	1.24652	0.420145	594	0.000483797	9	10	3	8	7	9	5	5	5	10	17	17	3	3	2	8	9	8	27	21	23	55	50	82	22	27	21	9	35	4	20	15	18
16S_OTU00536	Bacteria	Planctomycetes	Planctomycetacia	Pirellulales	Pirellulaceae	Pirellula	19.6764	0.389509	0.0003	0.00112994	-0.0918316	0.0918316	0.814031	1.17402	381	0.000310314	6	5	5	6	5	9	12	8	7	0	1	0	0	1	1	1	1	3	26	40	5	17	26	40	25	27	14	3	20	6	11	12	12
16S_OTU00626	Bacteria	Gemmatimonadetes	Gemmatimonadetes	Gemmatimonadales	Gemmatimonadaceae	unclassified	18.6058	0.251013	0.0003	0.00112994	-0.243684	0.243684	0.699237	1.20172	152	0.0001238	20	17	14	12	4	6	12	8	7	7	10	2	1	2	0	4	1	0	0	0	0	13	2	5	1	0	1	1	0	2	0	0	0
16S_OTU00631	Bacteria	Verrucomicrobia	Verrucomicrobiae	Chthoniobacterales	Chthoniobacteraceae	Chthoniobacter	18.1601	0.158326	0.0003	0.00112994	0.619424	-0.619424	1.01873	0.456617	218	0.000177555	0	0	0	1	0	0	0	0	0	0	5	0	0	0	0	1	1	0	22	24	23	31	17	29	1	1	14	0	1	6	9	8	2
16S_OTU00642	Bacteria	Verrucomicrobia	Verrucomicrobiae	Opitutales	Opitutaceae	Opitutus	22.5331	0.207886	0.0003	0.00112994	0.15612	-0.15612	1.18709	0.773319	1186	0.000965965	31	37	25	19	15	6	29	16	25	19	22	36	23	19	21	25	23	18	62	47	32	72	60	69	60	84	56	25	49	15	29	36	23
16S_OTU00678	Bacteria	Patescibacteria	Parcubacteria	Candidatus_Kaiserbacteria	unclassified	unclassified	16.5991	0.107057	0.0003	0.00112994	-0.322619	0.322619	0.884125	1.02798	209	0.000170225	3	1	2	0	1	3	4	5	5	1	2	0	0	0	0	7	1	5	5	2	4	1	0	0	14	16	12	6	6	13	28	23	14
16S_OTU00714	Bacteria	Chloroflexi	Anaerolineae	RBG-13-54-9	unclassified	unclassified	11.0758	0.106398	0.0003	0.00112994	-0.0522755	0.0522755	0.436857	1.36462	110	8.9592e-05	23	32	14	4	7	3	6	1	2	9	1	0	1	2	4	0	1	0	0	0	0	0	0	0	0	0	0	0	0	0	0	0	0
16S_OTU00882	Bacteria	Firmicutes	Bacilli	Bacillales	Planococcaceae	Lysinibacillus	17.7386	0.19771	0.0003	0.00112994	-0.178497	0.178497	1.21579	0.716388	119	9.69223e-05	13	11	13	11	15	8	5	9	2	0	0	1	11	2	4	0	0	2	0	0	1	0	2	0	1	1	1	4	0	1	0	1	0
16S_OTU00919	Bacteria	Proteobacteria	Deltaproteobacteria	NB1-j	unclassified	unclassified	18.7265	0.169286	0.0003	0.00112994	0.206123	-0.206123	0.979511	1.00469	146	0.000118913	0	0	0	0	0	0	0	0	0	0	2	1	0	0	0	0	0	0	3	6	4	4	8	7	0	2	5	1	3	4	22	8	19
16S_OTU00924	Bacteria	Acidobacteria	Subgroup_6	unclassified	unclassified	unclassified	18.3403	0.21974	0.0003	0.00112994	0.393965	-0.393965	1.08686	0.740868	2835	0.00230903	22	16	12	29	20	19	42	38	51	18	57	39	18	21	16	49	40	48	132	150	90	69	75	71	151	149	142	111	182	136	127	189	144
16S_OTU01014	Bacteria	Bacteroidetes	Bacteroidia	Chitinophagales	Chitinophagaceae	Lacibacter	13.1237	0.149244	0.0003	0.00112994	-0.496403	0.496403	0.622023	1.07242	113	9.20354e-05	0	0	0	0	0	0	0	0	0	0	0	0	0	0	0	0	0	0	10	7	5	7	14	17	3	8	6	1	3	3	3	5	6
16S_OTU01017	Bacteria	Proteobacteria	Gammaproteobacteria	unclassified	unclassified	unclassified	20.7159	0.317427	0.0003	0.00112994	0.743929	-0.743929	0.90861	0.247551	95	7.73749e-05	1	0	0	1	0	1	2	3	3	0	2	3	0	0	2	3	4	2	3	1	5	1	1	2	2	3	4	6	6	4	4	6	6
16S_OTU01086	Bacteria	Planctomycetes	Planctomycetacia	unclassified	unclassified	unclassified	21.0008	0.261637	0.0003	0.00112994	0.130648	-0.130648	0.930669	1.07542	94	7.65604e-05	0	0	0	0	0	0	0	2	0	0	3	4	2	2	1	2	0	1	2	1	6	2	1	2	3	2	7	7	10	10	6	2	6
16S_OTU01116	Bacteria	Proteobacteria	Deltaproteobacteria	Desulfuromonadales	Geobacteraceae	Geobacter	7.79579	0.106601	0.0003	0.00112994	0.459549	-0.459549	1.10756	0.620427	110	8.9592e-05	2	2	2	0	0	0	3	2	0	0	3	1	0	0	3	0	0	0	4	9	4	21	5	45	0	0	1	1	0	2	0	0	0
16S_OTU01175	Bacteria	Acidobacteria	Subgroup_22	unclassified	unclassified	unclassified	20.3746	0.323551	0.0003	0.00112994	-0.200228	0.200228	0.854066	1.11557	134	0.000109139	5	1	0	4	8	3	0	3	3	4	3	7	14	12	7	2	8	11	1	2	1	0	1	1	2	0	0	0	0	4	5	5	1
16S_OTU01218	Bacteria	Planctomycetes	OM190	unclassified	unclassified	unclassified	16.9841	0.209622	0.0003	0.00112994	0.322064	-0.322064	0.870454	1.03994	129	0.000105067	0	2	0	4	3	2	2	2	5	1	4	2	2	2	4	1	1	0	2	3	0	4	2	4	0	1	0	3	1	6	14	5	12
16S_OTU01231	Bacteria	unclassified	unclassified	unclassified	unclassified	unclassified	16.3018	0.290458	0.0003	0.00112994	-0.658079	0.658079	0.432515	0.977071	102	8.30762e-05	10	8	9	0	4	5	1	6	4	4	2	2	3	1	2	3	2	0	3	3	4	0	4	1	11	6	1	1	2	0	0	0	0
16S_OTU01233	Bacteria	Latescibacteria	unclassified	unclassified	unclassified	unclassified	16.4996	0.309166	0.0003	0.00112994	0.443701	-0.443701	0.991161	0.812109	166	0.000135202	0	1	0	1	0	0	0	1	2	2	7	0	0	7	1	2	4	1	6	10	4	5	5	7	2	4	0	3	5	12	13	19	7
16S_OTU01282	Bacteria	Chloroflexi	Anaerolineae	Caldilineales	Caldilineaceae	unclassified	11.9184	0.243559	0.0003	0.00112994	-0.0841608	0.0841608	1.20295	0.772491	83	6.76012e-05	4	8	6	5	8	6	15	6	4	1	0	4	2	5	2	1	1	2	0	0	1	0	0	0	1	0	1	0	0	0	0	0	0
16S_OTU01324	Bacteria	Bacteroidetes	Bacteroidia	Chitinophagales	Saprospiraceae	unclassified	15.206	0.226424	0.0003	0.00112994	-0.352472	0.352472	0.285271	1.30933	186	0.000151492	0	0	0	0	0	0	0	1	0	0	0	1	0	0	0	0	0	0	20	23	11	8	12	20	10	9	12	4	6	4	7	10	7
16S_OTU01401	Bacteria	Gemmatimonadetes	Gemmatimonadetes	Gemmatimonadales	Gemmatimonadaceae	Gemmatimonas	15.1466	0.127171	0.0003	0.00112994	0.0557291	-0.0557291	1.03344	0.992093	108	8.79631e-05	3	6	4	5	1	4	1	1	7	4	0	3	3	0	1	2	5	3	4	4	3	11	8	12	0	2	0	3	3	2	0	3	0
16S_OTU01461	Bacteria	Proteobacteria	Alphaproteobacteria	Rhizobiales	Beijerinckiaceae	unclassified	16.2309	0.146646	0.0003	0.00112994	0.000341389	-0.000341389	1.17553	0.822774	114	9.28499e-05	0	0	0	0	0	1	1	0	1	1	3	5	0	0	0	5	1	1	5	5	1	4	3	7	1	6	5	1	0	2	8	9	8
16S_OTU01584	Bacteria	Verrucomicrobia	Verrucomicrobiae	Pedosphaerales	Pedosphaeraceae	unclassified	13.9865	0.275987	0.0003	0.00112994	-0.233706	0.233706	0.70914	1.20012	92	7.49315e-05	1	2	0	1	0	1	0	0	0	0	7	4	3	4	1	8	3	6	1	0	7	0	1	2	0	0	1	4	5	15	1	5	2
16S_OTU01624	Bacteria	Cyanobacteria	Melainabacteria	Obscuribacterales	unclassified	unclassified	20.7308	0.218908	0.0003	0.00112994	0.200373	-0.200373	0.755868	1.18426	67	5.45697e-05	0	1	0	5	4	2	0	0	2	0	2	2	2	2	4	6	6	8	0	0	0	0	0	0	0	3	1	0	6	3	3	1	2
16S_OTU01656	Bacteria	unclassified	unclassified	unclassified	unclassified	unclassified	17.0002	0.238336	0.0003	0.00112994	-0.153252	0.153252	0.878232	1.11256	48	3.90947e-05	1	2	5	6	4	6	8	3	5	1	0	2	3	0	0	0	0	2	0	0	0	0	0	0	0	0	0	0	0	0	0	0	0
16S_OTU01701	Bacteria	Armatimonadetes	Fimbriimonadia	Fimbriimonadales	Fimbriimonadaceae	unclassified	18.7625	0.29839	0.0003	0.00112994	0.34281	-0.34281	1.20563	0.597014	78	6.35289e-05	3	7	14	10	14	3	7	2	11	2	0	1	2	0	0	0	1	0	0	0	0	0	0	1	0	0	0	0	0	0	0	0	0
16S_OTU01802	Bacteria	Patescibacteria	Parcubacteria	Candidatus_Yanofskybacteria	unclassified	unclassified	16.6588	0.301037	0.0003	0.00112994	-0.43201	0.43201	0.74713	1.05138	113	9.20354e-05	19	4	0	1	0	2	2	12	8	4	0	1	1	3	2	0	0	0	2	8	13	6	9	10	3	0	2	1	0	0	0	0	0
16S_OTU01814	Bacteria	Actinobacteria	Thermoleophilia	Gaiellales	unclassified	unclassified	18.1502	0.262291	0.0003	0.00112994	0.38609	-0.38609	0.977684	0.887293	676	0.000550584	67	61	60	43	68	34	57	61	55	58	3	14	21	27	27	8	6	3	0	0	0	0	0	0	1	0	0	1	0	1	0	0	0
16S_OTU02045	Bacteria	Acidobacteria	Holophagae	Subgroup_7	unclassified	unclassified	21.1878	0.300779	0.0003	0.00112994	-0.360513	0.360513	0.616057	1.18493	75	6.10855e-05	2	5	9	10	5	1	7	11	9	0	3	0	2	0	0	1	1	0	1	1	0	0	2	1	0	0	1	0	0	1	0	0	1
16S_OTU02151	Bacteria	Acidobacteria	Holophagae	Holophagales	Holophagaceae	Holophaga	16.8367	0.294907	0.0003	0.00112994	0.0977372	-0.0977372	0.872256	1.13038	98	7.98183e-05	9	10	9	3	12	8	18	5	8	6	1	0	2	0	4	0	1	0	0	0	0	1	1	0	0	0	0	0	0	0	0	0	0
16S_OTU02668	Bacteria	Proteobacteria	Deltaproteobacteria	NB1-j	unclassified	unclassified	15.0327	0.228467	0.0003	0.00112994	-0.0420649	0.0420649	0.842858	1.1596	58	4.72394e-05	0	0	0	0	0	0	0	0	0	0	1	1	0	0	1	0	5	5	2	4	3	0	1	3	1	0	2	1	2	2	5	3	2
16S_OTU02728	Bacteria	Proteobacteria	Gammaproteobacteria	Betaproteobacteriales	Burkholderiaceae	unclassified	16.6928	0.227405	0.0003	0.00112994	0.0446799	-0.0446799	0.633128	1.28598	143	0.00011647	10	8	4	12	10	3	11	5	8	2	5	11	2	2	6	2	3	2	2	2	2	12	8	7	0	0	1	1	1	0	1	0	0
16S_OTU02908	Bacteria	Bacteroidetes	Bacteroidia	Sphingobacteriales	AKYH767	unclassified	17.9207	0.251395	0.0003	0.00112994	-0.259268	0.259268	0.810904	1.12201	33	2.68776e-05	1	4	2	1	1	1	0	0	0	2	3	3	2	1	1	2	2	3	0	0	0	0	0	0	0	0	0	2	1	0	0	1	0
16S_OTU03076	Bacteria	Actinobacteria	Thermoleophilia	Gaiellales	unclassified	unclassified	14.1722	0.211531	0.0003	0.00112994	-0.0138527	0.0138527	0.675162	1.26593	291	0.000237012	13	25	23	20	16	12	31	28	24	16	1	13	16	12	8	8	9	2	0	0	0	0	0	1	3	3	2	1	3	0	0	0	0
16S_OTU03082	Bacteria	Proteobacteria	Gammaproteobacteria	Acidiferrobacterales	Acidiferrobacteraceae	Sulfurifustis	19.2209	0.306483	0.0003	0.00112994	-0.120483	0.120483	0.983272	1.03017	57	4.6425e-05	0	0	0	0	0	0	0	1	1	0	6	3	0	0	0	1	3	3	0	0	0	0	0	0	0	1	0	2	0	2	11	9	2
16S_OTU03106	Bacteria	Proteobacteria	Gammaproteobacteria	Legionellales	Legionellaceae	Legionella	24.5495	0.373961	0.0003	0.00112994	-0.516755	0.516755	0.717045	0.989537	48	3.90947e-05	5	4	3	5	5	2	6	2	3	2	1	0	1	0	1	0	1	0	1	1	0	0	1	1	0	0	1	0	1	0	0	0	0
16S_OTU03130	Bacteria	Patescibacteria	Parcubacteria	unclassified	unclassified	unclassified	10.2969	0.093897	0.0003	0.00112994	0.552687	-0.552687	1.03528	0.58322	49	3.99092e-05	0	1	2	0	0	1	1	0	3	1	1	1	1	2	1	12	4	15	1	0	0	0	0	0	1	0	0	1	0	0	0	0	0
16S_OTU03133	Bacteria	Proteobacteria	Gammaproteobacteria	Betaproteobacteriales	unclassified	unclassified	19.8886	0.320377	0.0003	0.00112994	0.66489	-0.66489	0.864418	0.61273	36	2.9321e-05	0	0	0	1	0	0	0	1	2	0	1	1	2	0	1	0	3	2	0	0	1	0	0	0	0	0	0	2	3	6	2	0	2
16S_OTU03258	Bacteria	Verrucomicrobia	Verrucomicrobiae	Chthoniobacterales	Chthoniobacteraceae	Candidatus_Udaeobacter	15.8663	0.133222	0.0003	0.00112994	-0.419621	0.419621	0.812374	1.01291	174	0.000141718	5	4	8	11	10	5	1	1	3	0	1	4	12	4	9	21	34	20	0	0	0	0	0	0	0	0	0	10	1	10	0	0	0
16S_OTU03262	Bacteria	Proteobacteria	Deltaproteobacteria	Myxococcales	unclassified	unclassified	21.7422	0.103329	0.0003	0.00112994	-0.568413	0.568413	0.555249	1.03263	37	3.01355e-05	0	0	0	0	0	0	0	0	0	0	0	0	0	0	0	0	0	0	1	1	1	0	0	0	2	2	2	1	0	0	7	5	9
16S_OTU03636	Bacteria	Bacteroidetes	Ignavibacteria	Kryptoniales	BSV26	unclassified	15.1894	0.158563	0.0003	0.00112994	0.321624	-0.321624	1.25081	0.524644	33	2.68776e-05	2	1	2	3	6	3	3	3	1	0	1	1	0	0	0	2	2	2	0	0	1	0	0	0	0	0	0	0	0	0	0	0	0
16S_OTU03698	Bacteria	Planctomycetes	Phycisphaerae	Phycisphaerales	Phycisphaeraceae	AKYG587	18.7705	0.198781	0.0003	0.00112994	-0.181977	0.181977	0.869677	1.11012	55	4.4796e-05	0	0	0	0	0	0	0	0	0	0	0	0	0	0	0	0	0	0	4	2	2	0	4	1	0	0	0	1	0	4	8	5	7
16S_OTU03958	Bacteria	Bacteroidetes	Bacteroidia	Sphingobacteriales	AKYH767	unclassified	15.9472	0.248288	0.0003	0.00112994	0.0600544	-0.0600544	1.15549	0.846186	38	3.095e-05	5	3	5	2	0	5	6	3	5	0	0	1	0	0	0	0	2	0	0	0	0	0	0	0	0	0	0	1	0	0	0	0	0
16S_OTU04056	Bacteria	Patescibacteria	Parcubacteria	Candidatus_Adlerbacteria	unclassified	unclassified	15.0214	0.247571	0.0003	0.00112994	-0.10747	0.10747	0.55097	1.3156	28	2.28052e-05	1	4	1	1	2	5	3	3	7	0	0	0	0	0	0	0	1	0	0	0	0	0	0	0	0	0	0	0	0	0	0	0	0
16S_OTU04143	Bacteria	Verrucomicrobia	Verrucomicrobiae	Chthoniobacterales	Chthoniobacteraceae	Candidatus_Udaeobacter	16.2751	0.273102	0.0003	0.00112994	-0.321352	0.321352	0.41604	1.29114	39	3.17644e-05	1	0	0	0	0	1	2	1	1	3	2	4	3	0	6	7	2	5	0	0	0	0	0	0	0	0	0	0	0	0	0	0	0
16S_OTU04891	Bacteria	Actinobacteria	Acidimicrobiia	IMCC26256	unclassified	unclassified	18.8349	0.252558	0.0003	0.00112994	0.505588	-0.505588	0.957208	0.775412	90	7.33026e-05	0	0	0	1	2	2	1	1	1	1	0	3	3	0	4	8	4	5	1	3	0	1	1	3	4	1	4	1	3	2	4	6	1
16S_OTU05245	Bacteria	Patescibacteria	Parcubacteria	Candidatus_Kaiserbacteria	unclassified	unclassified	13.7692	0.209649	0.0003	0.00112994	0.384891	-0.384891	1.12836	0.686962	25	2.03618e-05	0	0	0	1	0	0	0	0	0	0	0	0	1	1	1	0	0	0	0	0	0	0	0	0	0	0	0	3	2	7	1	0	1
16S_OTU05436	Bacteria	Firmicutes	Bacilli	Bacillales	Bacillaceae	Bacillus	18.32	0.175201	0.0003	0.00112994	-0.462378	0.462378	0.716529	1.04531	23	1.87329e-05	1	4	4	3	3	2	0	1	0	0	0	0	1	1	1	0	0	1	0	0	0	0	0	1	0	0	0	0	0	0	0	0	0
16S_OTU05469	Bacteria	Proteobacteria	Gammaproteobacteria	CCD24	unclassified	unclassified	19.1402	0.162921	0.0003	0.00112994	0.358092	-0.358092	1.28485	0.369359	141	0.000114841	0	0	0	0	0	0	0	0	0	0	0	0	0	0	0	0	0	0	16	10	3	2	5	6	0	0	2	1	3	9	17	18	13
16S_OTU06462	Bacteria	Verrucomicrobia	Verrucomicrobiae	Pedosphaerales	Pedosphaeraceae	unclassified	14.6451	0.0795018	0.0003	0.00112994	-0.375761	0.375761	0.406254	1.26284	453	0.000368956	5	6	4	6	12	12	8	8	4	5	1	3	6	5	5	4	2	1	23	24	21	2	8	5	49	38	55	19	17	11	14	15	18
16S_OTU07827	Bacteria	Proteobacteria	Deltaproteobacteria	unclassified	unclassified	unclassified	17.2365	0.332949	0.0003	0.00112994	0.360447	-0.360447	0.860359	1.02151	26	2.11763e-05	0	0	0	0	0	0	0	0	0	0	3	0	0	0	0	0	0	1	0	0	1	0	0	1	0	0	0	2	1	4	2	1	3
16S_OTU09023	Bacteria	Acidobacteria	Subgroup_6	unclassified	unclassified	unclassified	14.3608	0.145635	0.0003	0.00112994	0.338423	-0.338423	1.29922	0.358218	84	6.84157e-05	1	5	0	14	8	13	6	3	8	0	0	0	1	0	2	1	4	3	1	0	2	0	1	1	1	0	3	5	0	1	0	0	0
16S_OTU09435	Bacteria	Proteobacteria	Alphaproteobacteria	unclassified	unclassified	unclassified	19.7108	0.325749	0.0003	0.00112994	0.0765025	-0.0765025	1.01096	1.01212	17	1.3846e-05	0	0	0	0	0	0	0	0	0	0	0	0	0	1	1	1	0	0	1	0	0	0	0	0	0	0	0	1	2	0	2	0	2
16S_OTU00101	Bacteria	Gemmatimonadetes	Gemmatimonadetes	Gemmatimonadales	Gemmatimonadaceae	unclassified	16.1894	0.34418	0.0004	0.00141168	0.160755	-0.160755	0.950315	1.04929	2424	0.00197428	69	80	54	65	46	61	50	64	42	21	27	17	31	27	43	32	50	26	103	170	92	73	111	138	125	99	75	54	65	53	101	62	62
16S_OTU00110	Bacteria	Proteobacteria	Alphaproteobacteria	Rhizobiales	Hyphomicrobiaceae	Pedomicrobium	18.1161	0.169544	0.0004	0.00141168	-0.0234519	0.0234519	0.998336	1.03004	852	0.000693931	6	6	2	18	17	13	27	36	39	3	26	29	18	8	13	45	33	39	24	28	19	14	25	21	30	26	27	31	24	24	37	30	33
16S_OTU00127	Bacteria	Rokubacteria	NC10	Rokubacteriales	unclassified	unclassified	19.379	0.315237	0.0004	0.00141168	-0.404685	0.404685	0.806492	1.03033	995	0.0008104	12	19	6	20	15	11	6	13	6	15	28	35	19	32	29	34	49	32	43	31	43	10	19	14	46	35	33	54	22	63	31	41	23
16S_OTU00158	Bacteria	Acidobacteria	Subgroup_6	unclassified	unclassified	unclassified	16.6188	0.15128	0.0004	0.00141168	-0.0481929	0.0481929	1.01216	1.01461	553	0.000450403	1	2	1	3	4	3	3	7	3	1	5	2	2	1	1	4	3	8	58	24	17	19	18	32	51	69	57	3	17	8	22	20	23
16S_OTU00238	Bacteria	Proteobacteria	Gammaproteobacteria	Betaproteobacteriales	A21b	unclassified	14.55	0.173507	0.0004	0.00141168	-0.507172	0.507172	0.818932	0.918404	909	0.000740356	75	138	95	59	39	28	54	78	65	77	23	52	22	19	21	20	18	8	0	0	0	0	0	0	10	4	3	1	0	0	0	0	0
16S_OTU00278	Bacteria	Verrucomicrobia	Verrucomicrobiae	Pedosphaerales	Pedosphaeraceae	unclassified	16.3315	0.136753	0.0004	0.00141168	-0.366222	0.366222	0.761908	1.09284	582	0.000474023	0	0	0	0	0	0	0	0	0	0	1	0	0	0	0	0	0	0	59	39	14	14	29	41	2	0	2	10	12	27	45	59	61
16S_OTU00361	Bacteria	Proteobacteria	Gammaproteobacteria	Betaproteobacteriales	A21b	unclassified	18.0414	0.241594	0.0004	0.00141168	-0.162491	0.162491	0.524468	1.31447	701	0.000570945	49	95	71	71	60	30	53	32	51	40	4	11	45	16	42	3	8	7	0	0	0	0	0	0	12	0	0	1	0	0	0	0	0
16S_OTU00432	Bacteria	Proteobacteria	Gammaproteobacteria	Betaproteobacteriales	Nitrosomonadaceae	IS-44	11.9708	0.192814	0.0004	0.00141168	0.360913	-0.360913	1.10595	0.748242	704	0.000573389	0	0	0	1	0	0	3	1	1	0	20	10	0	0	0	6	20	8	12	5	35	5	22	19	17	17	23	10	6	42	85	63	21
16S_OTU00445	Bacteria	Planctomycetes	Phycisphaerae	Phycisphaerales	Phycisphaeraceae	AKYG587	10.867	0.21551	0.0004	0.00141168	-0.243129	0.243129	1.0161	0.949313	198	0.000161266	0	0	0	0	0	0	0	0	0	0	0	0	0	0	0	0	1	0	7	12	6	4	8	6	2	6	6	14	10	33	18	20	10
16S_OTU00546	Bacteria	Cyanobacteria	Oxyphotobacteria	Chloroplast	unclassified	unclassified	16.9526	0.183523	0.0004	0.00141168	0.235069	-0.235069	1.17019	0.756618	336	0.000273663	12	9	7	7	7	12	17	8	5	4	17	15	2	15	5	1	2	5	7	9	5	11	14	21	25	27	26	1	10	3	6	0	10
16S_OTU00624	Bacteria	Actinobacteria	Actinobacteria	Frankiales	Geodermatophilaceae	Blastococcus	17.3724	0.138199	0.0004	0.00141168	0.125163	-0.125163	1.06758	0.94123	673	0.00054814	11	18	28	45	36	25	44	39	27	11	5	12	10	12	8	8	8	17	19	12	16	16	17	23	9	25	16	7	7	3	28	22	34
16S_OTU01071	Bacteria	Patescibacteria	Parcubacteria	Candidatus_Kaiserbacteria	unclassified	unclassified	14.058	0.216049	0.0004	0.00141168	0.643277	-0.643277	0.989907	0.450126	90	7.33026e-05	0	0	0	0	0	0	0	0	0	0	0	0	0	0	0	0	0	0	0	2	0	2	0	0	0	5	8	1	9	4	11	8	11
16S_OTU01152	Bacteria	Planctomycetes	Planctomycetacia	Gemmatales	Gemmataceae	unclassified	19.4528	0.321931	0.0004	0.00141168	-0.182615	0.182615	0.976276	1.01739	196	0.000159637	1	0	0	1	0	0	0	0	0	2	13	12	0	4	0	6	14	5	9	8	9	5	2	9	0	1	2	0	3	17	19	14	15
16S_OTU01191	Bacteria	Patescibacteria	Parcubacteria	Candidatus_Adlerbacteria	unclassified	unclassified	14.2543	0.261149	0.0004	0.00141168	0.433208	-0.433208	1.06387	0.727725	156	0.000127058	25	26	4	19	5	8	9	4	11	3	0	1	3	0	2	2	5	2	0	7	1	2	4	4	1	1	0	3	1	1	2	0	0
16S_OTU01204	Bacteria	Chloroflexi	OLB14	unclassified	unclassified	unclassified	16.5844	0.241785	0.0004	0.00141168	0.240263	-0.240263	1.0897	0.865529	62	5.04973e-05	0	0	0	0	0	0	0	0	0	0	0	0	0	0	0	1	1	0	6	1	5	0	3	2	0	0	0	6	2	3	7	7	5
16S_OTU01234	Bacteria	Proteobacteria	Deltaproteobacteria	NB1-j	unclassified	unclassified	13.0636	0.139663	0.0004	0.00141168	-0.305254	0.305254	0.799058	1.1059	95	7.73749e-05	1	2	1	6	9	3	0	2	2	0	1	5	8	16	8	13	9	8	0	0	0	0	0	0	0	0	1	0	0	0	0	0	0
16S_OTU01342	Bacteria	Acidobacteria	Subgroup_25	unclassified	unclassified	unclassified	16.4044	0.212802	0.0004	0.00141168	-0.114813	0.114813	0.706884	1.23743	92	7.49315e-05	0	0	0	0	0	0	0	0	0	0	0	0	0	0	0	0	0	0	3	0	1	6	3	3	0	1	0	1	3	7	18	12	3
16S_OTU01378	Bacteria	Planctomycetes	Phycisphaerae	Tepidisphaerales	WD2101_soil_group	unclassified	20.9092	0.204772	0.0004	0.00141168	0.0994837	-0.0994837	1.04179	0.975981	100	8.14473e-05	1	1	1	4	2	3	0	1	0	0	4	0	0	0	1	0	2	2	9	8	7	9	6	12	2	4	2	1	4	1	1	2	6
16S_OTU01421	Bacteria	Acidobacteria	Subgroup_6	unclassified	unclassified	unclassified	19.9199	0.225782	0.0004	0.00141168	-0.2792	0.2792	0.608482	1.2343	214	0.000174297	1	1	0	3	1	3	8	11	5	0	2	1	1	2	2	4	5	2	6	2	7	1	5	8	3	1	1	1	9	18	21	16	13
16S_OTU01445	Bacteria	Patescibacteria	Parcubacteria	unclassified	unclassified	unclassified	11.2184	0.216553	0.0004	0.00141168	-0.102506	0.102506	0.489564	1.34048	40	3.25789e-05	6	11	1	3	4	4	6	2	0	1	0	0	1	0	1	0	0	0	0	0	0	0	0	0	0	0	0	0	0	0	0	0	0
16S_OTU01508	Bacteria	Patescibacteria	Parcubacteria	Candidatus_Kaiserbacteria	unclassified	unclassified	17.2972	0.275175	0.0004	0.00141168	-0.0552373	0.0552373	1.0583	0.965587	250	0.000203618	2	0	1	3	7	2	3	6	13	0	2	2	7	3	6	17	7	17	13	5	8	0	1	0	4	8	1	12	4	24	13	19	8
16S_OTU01572	Bacteria	Chloroflexi	Anaerolineae	Anaerolineales	Anaerolineaceae	unclassified	14.028	0.203497	0.0004	0.00141168	0.236832	-0.236832	0.881642	1.07831	110	8.9592e-05	0	0	0	0	0	0	0	0	0	0	0	0	0	0	0	0	0	0	2	2	0	0	7	4	0	0	0	1	2	11	13	15	6
16S_OTU01618	Bacteria	WS2	unclassified	unclassified	unclassified	unclassified	18.0744	0.296735	0.0004	0.00141168	-0.306273	0.306273	1.09863	0.808205	226	0.000184071	12	13	27	17	14	14	17	5	5	1	2	8	3	5	4	12	9	7	7	3	3	3	7	5	2	7	1	0	2	3	1	1	2
16S_OTU01643	Bacteria	Patescibacteria	Parcubacteria	unclassified	unclassified	unclassified	15.0041	0.246785	0.0004	0.00141168	-0.0924233	0.0924233	0.874094	1.12991	129	0.000105067	1	2	1	0	1	1	4	7	13	2	3	4	3	7	4	5	12	7	0	1	3	1	0	0	3	1	1	8	3	9	4	7	2
16S_OTU01920	Bacteria	Planctomycetes	Phycisphaerae	Phycisphaerales	Phycisphaeraceae	SM1A02	16.3265	0.313784	0.0004	0.00141168	0.0711666	-0.0711666	1.03947	0.983671	33	2.68776e-05	0	0	0	0	0	0	0	0	2	0	1	2	0	0	0	0	2	4	0	0	0	0	0	0	1	1	0	0	2	5	2	2	1
16S_OTU01976	Bacteria	Planctomycetes	Planctomycetacia	Gemmatales	Gemmataceae	unclassified	16.3438	0.140592	0.0004	0.00141168	-0.0682646	0.0682646	0.704603	1.24599	84	6.84157e-05	0	0	0	0	0	0	1	0	0	0	0	0	0	0	0	0	0	0	5	0	0	1	3	4	1	2	8	3	0	3	9	4	7
16S_OTU01987	Bacteria	Proteobacteria	Deltaproteobacteria	NB1-j	unclassified	unclassified	18.7778	0.274122	0.0004	0.00141168	0.10571	-0.10571	0.921203	1.08929	72	5.8642e-05	1	0	0	0	0	0	0	0	0	0	2	1	0	0	0	0	0	0	3	4	3	2	2	1	1	0	2	2	1	8	8	7	5
16S_OTU02099	Bacteria	Planctomycetes	Planctomycetacia	Pirellulales	Pirellulaceae	Pirellula	14.3044	0.32487	0.0004	0.00141168	0.671272	-0.671272	0.986216	0.363289	143	0.00011647	9	8	8	4	13	9	8	7	9	3	4	5	3	6	5	5	4	4	1	3	3	2	2	0	3	2	5	0	1	1	2	0	2
16S_OTU02108	Bacteria	Planctomycetes	Planctomycetacia	Gemmatales	Gemmataceae	Fimbriiglobus	17.3995	0.267256	0.0004	0.00141168	-0.0331892	0.0331892	0.96288	1.06271	227	0.000184885	2	1	5	2	3	1	3	4	5	5	7	9	8	11	6	18	6	17	6	5	6	6	5	9	5	2	9	5	19	7	5	5	9
16S_OTU02137	Bacteria	Planctomycetes	Phycisphaerae	Phycisphaerales	Phycisphaeraceae	SM1A02	16.6799	0.295715	0.0004	0.00141168	-0.0112765	0.0112765	0.957705	1.06834	37	3.01355e-05	0	0	0	0	0	0	0	0	0	0	1	0	0	0	0	1	1	0	1	0	4	0	0	0	0	0	0	3	1	5	5	2	2
16S_OTU02159	Bacteria	Patescibacteria	Saccharimonadia	Saccharimonadales	unclassified	unclassified	18.2104	0.206867	0.0004	0.00141168	-0.434058	0.434058	0.827828	0.987191	84	6.84157e-05	6	4	2	18	14	5	10	5	7	6	1	1	1	0	1	2	1	0	0	0	0	0	0	0	0	0	0	0	0	0	0	0	0
16S_OTU02268	Bacteria	Acidobacteria	Subgroup_17	unclassified	unclassified	unclassified	20.3178	0.353366	0.0004	0.00141168	0.392531	-0.392531	0.907863	0.953058	204	0.000166152	0	2	0	5	6	4	1	3	8	2	13	12	7	10	3	19	8	18	2	1	6	2	3	2	3	4	4	6	3	14	3	6	3
16S_OTU02340	Bacteria	Proteobacteria	Gammaproteobacteria	Diplorickettsiales	Diplorickettsiaceae	Aquicella	19.6722	0.330917	0.0004	0.00141168	0.427303	-0.427303	1.09064	0.694753	40	3.25789e-05	0	3	6	3	1	2	5	2	3	2	2	1	0	0	0	0	0	0	4	2	1	0	0	2	0	0	1	0	0	0	0	0	0
16S_OTU02349	Bacteria	Actinobacteria	Thermoleophilia	unclassified	unclassified	unclassified	15.7238	0.192578	0.0004	0.00141168	0.379585	-0.379585	0.975192	0.895937	34	2.76921e-05	0	1	0	3	0	1	1	0	0	0	1	0	0	0	1	1	1	1	1	0	1	0	0	1	0	0	0	1	0	1	5	3	3
16S_OTU02662	Bacteria	Chloroflexi	Chloroflexia	Chloroflexales	Roseiflexaceae	unclassified	18.3006	0.377509	0.0004	0.00141168	0.235853	-0.235853	1.09487	0.861563	65	5.29407e-05	2	3	10	2	3	4	8	5	2	2	0	2	0	0	1	0	0	0	3	1	0	0	4	5	0	4	1	0	1	0	0	0	0
16S_OTU02767	Bacteria	Planctomycetes	Planctomycetacia	Pirellulales	Pirellulaceae	Rhodopirellula	11.2476	0.174121	0.0004	0.00141168	0.217441	-0.217441	0.988592	0.990649	72	5.8642e-05	1	0	0	0	0	0	2	0	1	1	1	0	0	0	0	1	1	1	6	8	1	4	7	18	2	5	3	0	2	0	2	1	1
16S_OTU02902	Bacteria	Chloroflexi	Anaerolineae	unclassified	unclassified	unclassified	21.0947	0.276013	0.0004	0.00141168	-0.371875	0.371875	0.561326	1.20453	81	6.59723e-05	1	0	0	0	0	0	1	3	3	0	2	0	0	0	0	5	2	7	1	0	1	1	1	1	0	2	3	2	1	5	9	6	7
16S_OTU03513	Bacteria	Planctomycetes	Phycisphaerae	Phycisphaerales	Phycisphaeraceae	SM1A02	14.979	0.243937	0.0004	0.00141168	0.579834	-0.579834	0.969544	0.637841	28	2.28052e-05	0	0	0	0	0	0	0	0	1	0	0	1	0	0	0	0	0	0	1	0	0	1	1	2	0	0	1	3	1	2	1	2	3
16S_OTU03702	Bacteria	Planctomycetes	Phycisphaerae	CCM11a	unclassified	unclassified	12.8645	0.112581	0.0004	0.00141168	-0.521404	0.521404	0.580469	1.07059	21	1.71039e-05	0	0	0	0	0	0	0	2	0	0	0	0	0	0	0	0	0	0	0	1	0	0	0	1	0	0	0	0	0	1	1	2	1
16S_OTU03731	Bacteria	Patescibacteria	Parcubacteria	Candidatus_Nomurabacteria	unclassified	unclassified	14.515	0.234911	0.0004	0.00141168	0.23213	-0.23213	0.832973	1.11842	81	6.59723e-05	2	1	4	0	2	0	2	2	8	2	0	5	3	2	3	12	3	7	0	0	0	0	1	0	0	1	0	1	0	2	3	2	1
16S_OTU04160	Bacteria	unclassified	unclassified	unclassified	unclassified	unclassified	15.4068	0.138167	0.0004	0.00141168	0.0790575	-0.0790575	1.06096	0.959146	31	2.52487e-05	1	0	1	1	0	1	1	0	1	0	1	0	0	0	0	1	1	0	1	0	0	0	0	0	1	0	0	0	1	0	3	6	4
16S_OTU04308	Bacteria	Bacteroidetes	Bacteroidia	Cytophagales	Microscillaceae	unclassified	13.2227	0.248616	0.0004	0.00141168	-0.77368	0.77368	0.365805	0.81082	37	3.01355e-05	0	0	0	1	2	0	0	0	1	2	3	8	2	2	4	8	3	1	0	0	0	0	0	0	0	0	0	0	0	0	0	0	0
16S_OTU04918	Bacteria	Acidobacteria	Subgroup_17	unclassified	unclassified	unclassified	15.2099	0.316707	0.0004	0.00141168	-0.352712	0.352712	0.4954	1.24497	71	5.78276e-05	0	0	1	0	1	1	2	0	0	2	2	0	3	0	2	2	1	0	3	1	3	2	1	1	0	2	1	3	4	9	3	3	6
16S_OTU05508	Bacteria	Chloroflexi	Ktedonobacteria	C0119	unclassified	unclassified	12.0253	0.236435	0.0004	0.00141168	-0.0215543	0.0215543	0.604281	1.30103	23	1.87329e-05	1	3	5	6	1	1	2	2	1	0	0	0	0	1	0	0	0	0	0	0	0	0	0	0	0	0	0	0	0	0	0	0	0
16S_OTU05591	Bacteria	Acidobacteria	Subgroup_15	unclassified	unclassified	unclassified	18.8264	0.261326	0.0004	0.00141168	-0.647754	0.647754	0.59692	0.902207	27	2.19908e-05	1	2	0	4	3	2	0	4	3	0	0	0	0	1	0	0	0	0	0	0	1	0	0	0	2	1	1	1	1	0	0	0	0
16S_OTU07696	Bacteria	Acidobacteria	Subgroup_6	unclassified	unclassified	unclassified	16.1893	0.129213	0.0004	0.00141168	-0.502983	0.502983	0.527614	1.11566	24	1.95473e-05	3	3	4	1	1	0	3	1	2	1	1	2	1	0	1	0	0	0	0	0	0	0	0	0	0	0	0	0	0	0	0	0	0
16S_OTU08292	Bacteria	Verrucomicrobia	Verrucomicrobiae	Opitutales	Opitutaceae	Opitutus	28.5208	0.489904	0.0004	0.00141168	-0.28665	0.28665	0.784347	1.12677	394	0.000320902	5	14	17	9	8	3	9	10	8	17	13	26	19	13	10	16	15	10	6	8	8	4	7	3	7	15	6	6	17	14	16	11	12
16S_OTU08821	Bacteria	Planctomycetes	OM190	unclassified	unclassified	unclassified	14.1495	0.105826	0.0004	0.00141168	0.00010876	-0.00010876	1.03486	0.993931	19	1.5475e-05	0	0	0	0	0	0	0	0	0	0	0	0	0	0	0	0	0	0	3	1	1	0	0	0	4	3	3	0	0	1	1	1	0
16S_OTU00243	Bacteria	Acidobacteria	Subgroup_6	unclassified	unclassified	unclassified	16.1458	0.25216	0.0005	0.001685	0.44351	-0.44351	0.942909	0.867872	1662	0.00135365	8	9	18	15	7	9	11	14	16	5	26	10	9	7	11	38	14	17	52	84	51	32	53	48	64	82	105	63	92	103	95	124	133
16S_OTU00399	Bacteria	Bacteroidetes	Bacteroidia	Cytophagales	Microscillaceae	unclassified	16.0497	0.162442	0.0005	0.001685	0.188124	-0.188124	0.950122	1.03978	331	0.000269591	1	1	1	1	2	4	1	0	2	0	0	0	1	1	0	2	2	2	8	3	7	0	6	3	30	16	32	21	17	28	23	19	29
16S_OTU00488	Bacteria	Rokubacteria	NC10	Rokubacteriales	unclassified	unclassified	16.0917	0.190064	0.0005	0.001685	-0.420091	0.420091	0.778876	1.03849	923	0.000751758	10	8	0	13	3	8	1	8	4	18	14	4	8	13	11	31	47	22	56	47	54	24	37	38	23	6	18	10	9	45	62	59	54
16S_OTU00552	Bacteria	Gemmatimonadetes	Gemmatimonadetes	Gemmatimonadales	Gemmatimonadaceae	unclassified	17.0102	0.100767	0.0005	0.001685	-0.470802	0.470802	0.73663	1.02314	340	0.000276921	0	0	0	0	0	0	5	5	2	0	4	1	2	0	0	0	1	0	20	23	11	14	16	19	4	10	12	6	7	11	34	25	26
16S_OTU00662	Bacteria	Planctomycetes	Planctomycetacia	Pirellulales	Pirellulaceae	Blastopirellula	13.788	0.170047	0.0005	0.001685	-0.291508	0.291508	0.706849	1.17441	152	0.0001238	1	0	0	4	0	0	2	2	3	0	2	1	0	1	0	3	0	0	8	6	4	1	2	5	1	8	7	2	7	6	20	12	10
16S_OTU00667	Bacteria	Planctomycetes	Planctomycetacia	Pirellulales	Pirellulaceae	Pirellula	14.522	0.291614	0.0005	0.001685	0.349413	-0.349413	1.06389	0.817573	236	0.000192216	3	0	1	7	1	4	4	4	11	4	16	7	11	5	5	25	4	11	3	3	7	0	1	0	10	8	8	7	9	4	14	6	10
16S_OTU00683	Bacteria	Verrucomicrobia	Verrucomicrobiae	Chthoniobacterales	Chthoniobacteraceae	Candidatus_Udaeobacter	14.5968	0.253456	0.0005	0.001685	-0.285096	0.285096	0.715357	1.17259	728	0.000592936	44	36	32	41	30	26	3	24	34	17	33	61	63	52	41	60	28	75	0	0	0	0	0	0	0	0	0	17	4	7	0	0	0
16S_OTU00758	Bacteria	Rokubacteria	NC10	Rokubacteriales	unclassified	unclassified	15.5771	0.193789	0.0005	0.001685	-0.38826	0.38826	0.673138	1.13423	165	0.000134388	0	0	0	0	0	0	0	0	0	0	3	0	0	0	0	2	7	2	2	15	8	6	8	11	1	2	3	2	6	8	16	14	10
16S_OTU00953	Bacteria	Proteobacteria	Gammaproteobacteria	Betaproteobacteriales	TRA3-20	unclassified	13.9483	0.278333	0.0005	0.001685	-0.115022	0.115022	0.878855	1.12179	299	0.000243527	7	3	0	6	2	4	12	13	13	3	0	3	1	1	2	2	2	3	13	30	9	28	13	21	14	13	13	12	10	1	14	3	13
16S_OTU01065	Bacteria	Bacteroidetes	Bacteroidia	Chitinophagales	Chitinophagaceae	Parafilimonas	17.8142	0.259663	0.0005	0.001685	-0.232505	0.232505	0.831535	1.11933	256	0.000208505	5	21	23	17	21	21	16	14	14	13	6	6	6	5	7	5	1	4	2	4	10	1	0	0	4	6	3	4	6	0	1	1	4
16S_OTU01242	Bacteria	Planctomycetes	Planctomycetacia	Gemmatales	Gemmataceae	Fimbriiglobus	15.0068	0.289919	0.0005	0.001685	0.384113	-0.384113	1.04809	0.804911	141	0.000114841	0	0	0	0	0	0	3	3	0	2	0	3	1	1	1	6	1	4	5	2	6	3	6	2	9	4	5	5	5	8	6	13	11
16S_OTU01285	Bacteria	Armatimonadetes	Fimbriimonadia	Fimbriimonadales	Fimbriimonadaceae	unclassified	15.2628	0.195518	0.0005	0.001685	-0.227181	0.227181	1.04497	0.926048	76	6.18999e-05	17	10	12	2	7	5	7	1	1	4	2	0	0	4	0	0	0	0	0	0	0	4	0	0	0	0	0	0	0	0	0	0	0
16S_OTU01487	Bacteria	Proteobacteria	Gammaproteobacteria	Xanthomonadales	Xanthomonadaceae	Lysobacter	15.1658	0.167754	0.0005	0.001685	0.0587242	-0.0587242	1.00359	1.02192	946	0.000770491	6	4	10	8	10	5	11	8	10	3	34	7	2	3	9	18	10	9	87	77	66	47	48	39	55	53	49	10	11	30	49	45	25
16S_OTU01766	Bacteria	Planctomycetes	Planctomycetacia	Pirellulales	Pirellulaceae	Pirellula	17.1634	0.272437	0.0005	0.001685	-0.222894	0.222894	0.688345	1.21647	111	9.04065e-05	1	2	5	6	5	5	2	2	2	4	0	2	7	7	3	6	1	5	1	0	0	1	2	1	0	1	1	6	9	2	2	6	3
16S_OTU01797	Bacteria	Proteobacteria	Alphaproteobacteria	Acetobacterales	Acetobacteraceae	unclassified	13.8517	0.229286	0.0005	0.001685	0.622624	-0.622624	1.1067	0.114456	161	0.00013113	12	22	24	8	12	10	15	7	15	15	0	1	6	6	3	2	0	2	0	0	1	0	0	0	0	0	0	0	0	0	0	0	0
16S_OTU01843	Bacteria	Acidobacteria	Subgroup_6	unclassified	unclassified	unclassified	14.8634	0.296613	0.0005	0.001685	-0.519425	0.519425	0.539736	1.09369	159	0.000129501	7	3	7	6	7	10	0	6	3	7	9	18	8	10	13	12	8	6	0	1	0	1	0	1	0	1	0	4	1	0	3	1	0
16S_OTU01882	Bacteria	Acidobacteria	Subgroup_22	unclassified	unclassified	unclassified	15.511	0.250661	0.0005	0.001685	0.121989	-0.121989	0.959206	1.05225	121	9.85512e-05	1	5	4	3	0	1	1	0	1	10	6	2	1	0	16	15	10	14	2	3	3	1	0	0	1	2	0	3	0	2	4	2	1
16S_OTU02036	Bacteria	Planctomycetes	Planctomycetacia	Pirellulales	Pirellulaceae	Pirellula	14.8314	0.190628	0.0005	0.001685	-0.477467	0.477467	0.631874	1.0848	1085	0.000883703	10	9	18	9	19	9	10	11	16	12	15	18	8	11	14	14	8	21	47	47	36	20	53	58	33	31	46	24	38	40	69	64	75
16S_OTU02067	Bacteria	Planctomycetes	Phycisphaerae	Tepidisphaerales	WD2101_soil_group	unclassified	13.6898	0.157193	0.0005	0.001685	-0.292978	0.292978	0.614174	1.22468	109	8.87775e-05	0	5	4	5	4	6	5	2	3	0	0	4	6	14	13	8	7	15	0	0	0	0	0	0	0	0	0	4	1	3	0	0	0
16S_OTU02635	Bacteria	Actinobacteria	Acidimicrobiia	unclassified	unclassified	unclassified	13.4221	0.206331	0.0005	0.001685	0.00517622	-0.00517622	0.811201	1.18352	32	2.60631e-05	0	0	0	0	0	0	0	0	0	0	0	1	0	0	0	0	0	0	1	3	0	0	0	2	0	0	1	1	0	3	1	3	4
16S_OTU02903	Bacteria	Patescibacteria	Gracilibacteria	Candidatus_Peregrinibacteria	unclassified	unclassified	12.7728	0.158094	0.0005	0.001685	0.201838	-0.201838	1.34599	0.401091	36	2.9321e-05	0	0	0	0	0	0	0	1	0	0	0	0	1	0	0	0	0	0	0	1	1	0	0	0	1	0	0	1	2	0	8	3	10
16S_OTU02990	Bacteria	Chloroflexi	Anaerolineae	SBR1031	A4b	unclassified	12.9015	0.247027	0.0005	0.001685	0.0637795	-0.0637795	0.768647	1.20805	77	6.27144e-05	8	7	3	8	16	1	16	5	7	1	0	2	0	1	0	1	0	1	0	0	0	0	0	0	0	0	0	0	0	0	0	0	0
16S_OTU03346	Bacteria	Chloroflexi	Ktedonobacteria	C0119	unclassified	unclassified	14.798	0.240825	0.0005	0.001685	0.222624	-0.222624	1.33097	0.427069	107	8.71486e-05	2	1	19	12	16	4	14	14	11	6	0	3	0	1	1	2	1	0	0	0	0	0	0	0	0	0	0	0	0	0	0	0	0
16S_OTU03780	Bacteria	Proteobacteria	Gammaproteobacteria	Betaproteobacteriales	SC-I-84	unclassified	17.8456	0.270948	0.0005	0.001685	-0.0997728	0.0997728	0.670727	1.26011	171	0.000139275	8	13	8	3	2	1	3	1	2	8	3	12	9	1	6	10	2	5	1	4	2	1	2	2	1	1	4	4	1	3	7	5	10
16S_OTU03828	Bacteria	Proteobacteria	Gammaproteobacteria	Betaproteobacteriales	B1-7BS	unclassified	12.1207	0.218986	0.0005	0.001685	-0.285446	0.285446	0.855432	1.07448	91	7.4117e-05	13	6	7	6	3	2	2	5	6	2	0	1	2	1	1	2	3	2	3	1	1	2	2	1	1	4	1	1	2	1	2	0	2
16S_OTU04591	Bacteria	Chloroflexi	KD4-96	unclassified	unclassified	unclassified	16.6487	0.298611	0.0005	0.001685	0.328534	-0.328534	1.22382	0.57665	139	0.000113212	1	0	0	0	0	0	0	0	0	0	14	5	0	0	0	1	5	3	5	3	2	0	9	8	4	2	1	1	10	6	13	8	7
16S_OTU05200	Bacteria	Proteobacteria	Gammaproteobacteria	Diplorickettsiales	Diplorickettsiaceae	Aquicella	17.8636	0.248657	0.0005	0.001685	0.259281	-0.259281	1.12319	0.809256	27	2.19908e-05	3	3	2	2	0	1	2	0	1	0	0	0	0	0	0	0	0	0	2	2	4	0	0	1	0	0	1	0	0	0	0	1	0
16S_OTU05475	Bacteria	Patescibacteria	Saccharimonadia	Saccharimonadales	unclassified	unclassified	14.8962	0.313396	0.0005	0.001685	-0.557566	0.557566	0.503857	1.0708	50	4.07236e-05	2	0	0	2	0	1	0	1	0	0	1	2	5	1	2	0	3	0	0	0	1	1	2	1	0	1	0	1	3	5	3	3	3
16S_OTU05683	Bacteria	Patescibacteria	ABY1	Candidatus_Magasanikbacteria	unclassified	unclassified	5.76056	0.129572	0.0005	0.001685	0.441165	-0.441165	1.23352	0.353685	31	2.52487e-05	2	12	3	1	3	2	1	1	3	0	1	0	0	1	0	0	1	0	0	0	0	0	0	0	0	0	0	0	0	0	0	0	0
16S_OTU05734	Bacteria	Planctomycetes	Phycisphaerae	Tepidisphaerales	WD2101_soil_group	unclassified	8.59403	0.188672	0.0005	0.001685	-0.408761	0.408761	0.732231	1.08113	22	1.79184e-05	0	0	0	1	1	0	0	0	0	1	2	7	3	1	0	1	1	3	0	0	0	0	0	0	0	0	0	0	1	0	0	0	0
16S_OTU06011	Bacteria	Acidobacteria	Blastocatellia_(Subgroup_4)	DS-100	unclassified	unclassified	9.13892	0.185002	0.0005	0.001685	-0.0132963	0.0132963	1.31001	0.585075	26	2.11763e-05	0	0	0	0	0	0	0	0	0	0	0	0	0	0	0	0	0	0	1	0	1	0	1	0	0	0	0	0	3	1	3	4	2
16S_OTU07159	Bacteria	Bacteroidetes	Bacteroidia	Chitinophagales	Chitinophagaceae	unclassified	9.98848	0.172515	0.0005	0.001685	-0.331199	0.331199	0.482202	1.26254	174	0.000141718	3	1	23	0	1	1	0	0	0	37	3	42	9	11	16	10	9	5	0	0	0	0	0	0	0	0	0	1	2	0	0	0	0
16S_OTU07738	Bacteria	Proteobacteria	Deltaproteobacteria	Myxococcales	unclassified	unclassified	14.4515	0.229572	0.0005	0.001685	-0.421473	0.421473	0.603947	1.148	151	0.000122985	4	9	6	3	2	3	3	1	5	9	5	17	8	9	9	10	5	6	3	7	3	2	1	0	1	0	2	2	4	0	0	1	2
16S_OTU07875	Bacteria	Planctomycetes	OM190	unclassified	unclassified	unclassified	15.1389	0.292029	0.0005	0.001685	0.0365446	-0.0365446	0.993316	1.03408	35	2.85065e-05	0	0	0	0	1	0	0	0	0	1	1	3	1	0	0	5	2	2	0	1	0	0	0	0	0	0	0	0	7	4	0	0	3
16S_OTU08235	Bacteria	Patescibacteria	Kazania	unclassified	unclassified	unclassified	17.4511	0.28472	0.0005	0.001685	-0.418823	0.418823	0.87886	0.95654	27	2.19908e-05	0	3	3	3	5	1	4	3	2	0	0	0	0	0	0	0	0	2	0	0	0	0	0	0	0	1	0	0	0	0	0	0	0
16S_OTU08594	Bacteria	Planctomycetes	Planctomycetacia	Pirellulales	Pirellulaceae	Pir4_lineage	18.0908	0.208208	0.0005	0.001685	0.0306567	-0.0306567	0.764194	1.21361	215	0.000175112	3	3	1	5	2	2	5	1	5	0	3	4	2	2	2	13	2	8	9	4	2	1	2	3	13	13	9	7	11	9	14	12	7
16S_OTU00132	Bacteria	Acidobacteria	Subgroup_6	unclassified	unclassified	unclassified	15.4652	0.289077	0.0006	0.00193009	-0.184285	0.184285	1.11207	0.86614	1747	0.00142288	20	14	21	24	17	22	37	34	29	11	36	25	26	16	27	37	24	42	50	78	77	31	42	48	56	56	82	54	63	112	71	101	103
16S_OTU00138	Bacteria	Proteobacteria	Gammaproteobacteria	Betaproteobacteriales	SC-I-84	unclassified	15.9132	0.163489	0.0006	0.00193009	-0.242552	0.242552	1.13731	0.800472	570	0.00046425	28	25	25	5	8	13	8	2	8	40	33	42	16	30	41	14	10	25	13	16	15	6	3	4	6	2	5	42	66	10	3	0	1
16S_OTU00287	Bacteria	Armatimonadetes	Fimbriimonadia	Fimbriimonadales	Fimbriimonadaceae	unclassified	18.994	0.257917	0.0006	0.00193009	0.660682	-0.660682	0.775532	0.730082	633	0.000515561	18	10	18	19	26	15	19	27	30	9	17	12	12	20	18	27	12	26	38	14	22	25	18	35	18	32	26	11	10	2	7	3	6
16S_OTU00296	Bacteria	Proteobacteria	Gammaproteobacteria	Betaproteobacteriales	Nitrosomonadaceae	GOUTA6	14.4206	0.0868021	0.0006	0.00193009	-0.412345	0.412345	0.640452	1.13516	542	0.000441444	55	76	40	1	0	0	5	3	0	32	52	54	30	58	77	0	0	0	0	0	4	1	1	5	0	0	0	13	23	12	0	0	0
16S_OTU00337	Bacteria	Planctomycetes	Planctomycetacia	Pirellulales	Pirellulaceae	Pirellula	15.0903	0.181211	0.0006	0.00193009	-0.102068	0.102068	0.911225	1.09838	761	0.000619814	2	5	0	4	1	7	9	6	12	1	8	9	2	4	1	11	12	15	25	27	49	9	19	20	34	19	47	15	27	29	70	50	57
16S_OTU00357	Bacteria	Planctomycetes	Planctomycetacia	Pirellulales	Pirellulaceae	Pir4_lineage	16.1114	0.255947	0.0006	0.00193009	-0.256815	0.256815	0.90115	1.05218	399	0.000324975	9	9	7	12	9	7	18	7	9	5	13	9	2	6	7	15	7	18	13	9	8	11	8	10	9	2	12	12	16	12	20	14	26
16S_OTU00394	Bacteria	Proteobacteria	Alphaproteobacteria	Caulobacterales	Caulobacteraceae	Caulobacter	14.7137	0.229957	0.0006	0.00193009	-0.0649844	0.0649844	0.940762	1.07928	865	0.000704519	40	39	72	31	44	28	45	20	32	27	28	35	12	18	14	25	9	33	26	12	21	49	27	35	14	22	10	12	39	9	7	3	8
16S_OTU00621	Bacteria	Verrucomicrobia	Verrucomicrobiae	Chthoniobacterales	Chthoniobacteraceae	Candidatus_Udaeobacter	14.8626	0.221695	0.0006	0.00193009	0.0447157	-0.0447157	0.85867	1.14773	421	0.000342893	31	30	68	46	45	23	29	21	18	25	6	7	34	5	10	3	1	1	1	1	2	0	0	1	3	4	0	4	1	1	0	0	0
16S_OTU00872	Bacteria	Chloroflexi	Dehalococcoidia	S085	unclassified	unclassified	13.2102	0.259039	0.0006	0.00193009	-0.393938	0.393938	0.676158	1.12827	201	0.000163709	2	1	0	0	0	1	3	1	1	1	38	19	0	10	0	2	11	4	6	1	5	1	2	4	0	1	3	1	2	6	22	8	6
16S_OTU01161	Bacteria	Chloroflexi	Anaerolineae	SBR1031	unclassified	unclassified	12.8836	0.140402	0.0006	0.00193009	-0.241754	0.241754	0.710363	1.19601	60	4.88684e-05	0	0	0	0	0	0	0	0	0	0	0	0	0	0	0	0	0	0	0	1	2	0	4	4	1	2	1	0	0	2	13	6	5
16S_OTU01223	Bacteria	Planctomycetes	Planctomycetacia	Gemmatales	Gemmataceae	unclassified	13.7709	0.216902	0.0006	0.00193009	0.353269	-0.353269	1.10944	0.750784	315	0.000256559	2	3	2	1	0	1	7	3	2	2	1	1	2	1	2	2	7	5	10	20	3	4	13	21	2	6	4	3	16	21	26	20	39
16S_OTU01462	Bacteria	Proteobacteria	Deltaproteobacteria	unclassified	unclassified	unclassified	16.4317	0.177992	0.0006	0.00193009	0.0331785	-0.0331785	1.16838	0.831499	339	0.000276106	2	12	4	12	13	10	14	9	15	8	15	12	9	6	12	22	10	18	10	4	5	1	9	9	7	3	3	13	20	19	10	3	6
16S_OTU01467	Bacteria	Planctomycetes	Planctomycetacia	Gemmatales	Gemmataceae	unclassified	12.9331	0.190643	0.0006	0.00193009	0.120678	-0.120678	0.764361	1.20156	54	4.39815e-05	0	1	0	0	0	0	0	0	0	0	0	1	1	1	0	0	0	1	1	2	3	0	2	1	0	1	3	0	3	1	9	2	5
16S_OTU01635	Bacteria	Acidobacteria	Subgroup_6	unclassified	unclassified	unclassified	11.8368	0.194593	0.0006	0.00193009	0.216486	-0.216486	0.793803	1.15302	324	0.000263889	7	0	0	20	2	11	3	9	2	2	15	12	4	2	7	15	15	11	5	5	10	0	9	4	16	3	5	34	21	16	11	9	6
16S_OTU01639	Bacteria	Actinobacteria	MB-A2-108	unclassified	unclassified	unclassified	12.5205	0.185763	0.0006	0.00193009	-0.2176	0.2176	0.871702	1.09485	51	4.15381e-05	0	0	0	0	0	0	0	0	0	0	1	0	0	0	0	0	0	0	2	0	1	1	2	4	0	0	0	0	1	4	3	9	9
16S_OTU01746	Bacteria	Latescibacteria	unclassified	unclassified	unclassified	unclassified	15.6057	0.263005	0.0006	0.00193009	-0.177695	0.177695	0.91663	1.07319	107	8.71486e-05	1	2	5	2	5	2	2	3	5	1	2	1	1	5	0	2	1	3	9	7	1	9	11	5	3	5	4	0	3	1	2	1	0
16S_OTU01823	Bacteria	Planctomycetes	Planctomycetacia	Pirellulales	Pirellulaceae	Pirellula	14.5066	0.251288	0.0006	0.00193009	0.133305	-0.133305	0.915696	1.08752	96	7.81894e-05	3	9	1	8	7	4	15	7	7	0	2	0	1	2	1	3	1	5	0	2	5	3	2	0	1	0	1	1	1	3	1	0	0
16S_OTU01884	Bacteria	Acidobacteria	Holophagae	Subgroup_7	unclassified	unclassified	13.7171	0.248654	0.0006	0.00193009	-0.139049	0.139049	0.534747	1.31603	108	8.79631e-05	1	1	0	1	2	1	3	3	8	4	3	0	1	0	0	2	0	2	5	13	4	6	5	10	3	8	6	1	0	0	4	3	0
16S_OTU02011	Bacteria	Patescibacteria	Saccharimonadia	Saccharimonadales	unclassified	unclassified	13.6078	0.291088	0.0006	0.00193009	-0.227197	0.227197	0.54769	1.28435	47	3.82802e-05	8	1	3	5	0	3	6	2	5	0	0	1	2	0	2	0	0	0	0	2	3	1	1	1	0	0	0	1	0	0	0	0	0
16S_OTU02043	Bacteria	Planctomycetes	Phycisphaerae	Tepidisphaerales	WD2101_soil_group	unclassified	17.154	0.218067	0.0006	0.00193009	0.00501795	-0.00501795	0.951349	1.07411	68	5.53842e-05	0	0	0	0	0	0	0	0	0	0	0	0	0	0	0	0	0	0	3	4	1	1	0	0	0	0	0	1	0	10	14	13	7
16S_OTU02461	Bacteria	Patescibacteria	Parcubacteria	unclassified	unclassified	unclassified	7.74952	0.0881168	0.0006	0.00193009	0.393165	-0.393165	1.18957	0.562491	34	2.76921e-05	0	0	0	0	0	0	0	1	3	0	1	1	0	0	0	0	0	0	1	1	0	1	0	0	7	12	3	0	0	1	2	0	0
16S_OTU02466	Bacteria	Planctomycetes	Phycisphaerae	Tepidisphaerales	WD2101_soil_group	unclassified	12.1306	0.190359	0.0006	0.00193009	0.315077	-0.315077	0.678137	1.17844	220	0.000179184	7	7	13	4	11	13	3	10	13	15	8	15	21	27	15	17	12	9	0	0	0	0	0	0	0	0	0	0	0	0	0	0	0
16S_OTU02516	Bacteria	Actinobacteria	Actinobacteria	Streptosporangiales	Streptosporangiaceae	Nonomuraea	15.2976	0.236693	0.0006	0.00193009	0.306648	-0.306648	1.02554	0.898868	91	7.4117e-05	2	2	3	8	3	6	7	5	6	2	1	0	2	4	4	0	0	4	2	4	2	3	2	3	3	1	2	3	2	1	1	0	1
16S_OTU02729	Bacteria	Proteobacteria	Alphaproteobacteria	Rhizobiales	Hyphomicrobiaceae	Pedomicrobium	7.29544	0.162455	0.0006	0.00193009	-0.262664	0.262664	0.464647	1.30262	34	2.76921e-05	0	0	0	2	0	1	0	0	0	0	4	4	2	2	1	3	11	2	0	0	0	0	0	0	0	0	0	0	0	1	0	0	0
16S_OTU02766	Bacteria	Chloroflexi	Anaerolineae	SBR1031	A4b	unclassified	15.4877	0.250152	0.0006	0.00193009	-0.331015	0.331015	0.485323	1.26145	146	0.000118913	2	0	5	4	4	3	5	4	3	4	7	1	6	6	3	11	8	9	6	2	3	2	4	3	1	2	1	5	9	2	3	4	8
16S_OTU02799	Bacteria	Gemmatimonadetes	Gemmatimonadetes	Gemmatimonadales	Gemmatimonadaceae	Gemmatimonas	15.5312	0.266086	0.0006	0.00193009	-0.357664	0.357664	0.554101	1.21692	27	2.19908e-05	5	2	0	3	1	2	1	0	1	0	0	0	0	0	0	0	0	0	1	1	1	4	5	0	0	0	0	0	0	0	0	0	0
16S_OTU03135	Bacteria	Patescibacteria	WWE3	unclassified	unclassified	unclassified	11.4364	0.217451	0.0006	0.00193009	0.383475	-0.383475	1.17584	0.603998	43	3.50223e-05	2	0	0	2	0	0	0	4	3	0	0	0	0	0	0	0	0	0	1	1	8	1	0	1	3	10	4	0	2	1	0	0	0
16S_OTU03624	Bacteria	Dependentiae	Babeliae	Babeliales	Vermiphilaceae	unclassified	9.07954	0.0826735	0.0006	0.00193009	-0.0918347	0.0918347	0.66534	1.26423	72	5.8642e-05	1	1	3	0	0	2	5	2	0	7	21	18	3	2	1	0	3	1	0	1	1	0	0	0	0	0	0	0	0	0	0	0	0
16S_OTU03813	Bacteria	Proteobacteria	Gammaproteobacteria	Xanthomonadales	Rhodanobacteraceae	Chujaibacter	15.1063	0.268936	0.0006	0.00193009	-0.0520114	0.0520114	1.16565	0.833278	80	6.51578e-05	17	2	5	10	7	4	4	10	18	3	0	0	0	0	0	0	0	0	0	0	0	0	0	0	0	0	0	0	0	0	0	0	0
16S_OTU03979	Bacteria	Verrucomicrobia	Verrucomicrobiae	Pedosphaerales	Pedosphaeraceae	unclassified	16.0298	0.248746	0.0006	0.00193009	-0.0284402	0.0284402	0.856482	1.15046	24	1.95473e-05	0	0	1	0	0	0	2	0	0	1	4	4	1	4	3	1	1	1	0	0	0	0	0	0	0	0	0	0	0	1	0	0	0
16S_OTU04552	Bacteria	Bacteroidetes	Bacteroidia	Chitinophagales	Chitinophagaceae	unclassified	13.092	0.185274	0.0006	0.00193009	0.061754	-0.061754	0.650264	1.27589	409	0.000333119	11	10	14	11	22	8	24	18	29	17	40	26	23	16	22	36	18	37	0	0	1	6	5	4	1	0	0	3	5	2	0	0	0
16S_OTU04599	Bacteria	Patescibacteria	Saccharimonadia	Saccharimonadales	unclassified	unclassified	11.5849	0.172544	0.0006	0.00193009	-0.0789695	0.0789695	0.95839	1.06165	26	2.11763e-05	4	9	2	0	1	1	1	1	0	0	0	1	0	0	0	0	0	0	0	0	0	3	3	0	0	0	0	0	0	0	0	0	0
16S_OTU04967	Bacteria	Actinobacteria	Thermoleophilia	Gaiellales	unclassified	unclassified	16.6357	0.276203	0.0006	0.00193009	0.0362552	-0.0362552	0.914224	1.10464	31	2.52487e-05	4	1	5	1	5	1	4	3	4	2	0	0	0	0	1	0	0	0	0	0	0	0	0	0	0	0	0	0	0	0	0	0	0
16S_OTU05341	Bacteria	unclassified	unclassified	unclassified	unclassified	unclassified	14.4016	0.237528	0.0006	0.00193009	0.0647297	-0.0647297	0.567885	1.31433	86	7.00447e-05	0	4	0	0	0	2	8	1	2	0	3	0	0	1	0	0	6	8	0	0	0	0	0	0	1	0	0	12	3	7	5	6	7
16S_OTU05727	Bacteria	Bacteroidetes	Bacteroidia	Chitinophagales	Chitinophagaceae	Flavisolibacter	15.7018	0.316756	0.0006	0.00193009	-0.179703	0.179703	1.1824	0.769648	33	2.68776e-05	2	2	4	3	3	2	0	3	2	1	0	0	2	1	0	1	0	0	3	0	0	2	0	2	0	0	0	0	0	0	0	0	0
16S_OTU07173	Bacteria	Patescibacteria	Saccharimonadia	Saccharimonadales	unclassified	unclassified	14.1262	0.289033	0.0006	0.00193009	-0.436415	0.436415	0.674133	1.09592	167	0.000136017	7	2	5	10	3	8	13	4	12	4	4	6	0	1	6	5	2	1	6	6	3	3	7	18	9	5	2	2	6	2	0	1	0
16S_OTU07555	Bacteria	Acidobacteria	Acidobacteriia	Solibacterales	Solibacteraceae_(Subgroup_3)	Candidatus_Solibacter	16.7847	0.164281	0.0006	0.00193009	0.29377	-0.29377	1.21024	0.64139	308	0.000250858	18	19	11	16	10	10	11	12	9	8	12	8	21	13	21	15	20	18	0	2	6	2	2	2	3	1	0	12	10	9	4	1	1
16S_OTU09629	Bacteria	Acidobacteria	Subgroup_6	unclassified	unclassified	unclassified	16.4168	0.314341	0.0006	0.00193009	0.241315	-0.241315	1.29865	0.499003	14	1.14026e-05	0	0	0	0	0	0	0	1	0	1	1	0	1	1	2	1	0	2	0	0	0	0	0	0	0	0	0	1	2	0	0	1	0
16S_OTU00415	Bacteria	Proteobacteria	Deltaproteobacteria	Myxococcales	unclassified	unclassified	16.4204	0.27334	0.0007	0.00218893	0.476636	-0.476636	1.0532	0.684472	278	0.000226423	3	10	9	8	7	3	10	9	11	7	8	6	9	8	11	7	12	19	5	8	15	2	3	1	2	3	3	6	16	11	8	11	5
16S_OTU00807	Bacteria	Proteobacteria	Deltaproteobacteria	Myxococcales	Polyangiaceae	Pajaroellobacter	15.0491	0.319762	0.0007	0.00218893	-0.51149	0.51149	0.679072	1.0216	113	9.20354e-05	3	3	2	3	2	5	2	1	3	1	5	5	4	3	4	7	2	12	1	2	3	3	0	0	0	0	1	7	2	6	6	2	3
16S_OTU00933	Bacteria	Planctomycetes	Phycisphaerae	Tepidisphaerales	WD2101_soil_group	unclassified	11.2226	0.0776063	0.0007	0.00218893	-0.0647659	0.0647659	0.667922	1.26642	106	8.63341e-05	2	3	3	5	4	2	16	13	28	3	0	3	1	4	1	1	3	0	0	0	0	0	1	0	0	2	1	0	0	0	3	1	3
16S_OTU00972	Bacteria	Acidobacteria	Blastocatellia_(Subgroup_4)	Blastocatellales	Blastocatellaceae	Aridibacter	14.4664	0.209116	0.0007	0.00218893	-0.367527	0.367527	0.48814	1.23875	119	9.69223e-05	2	3	4	8	2	1	2	0	3	0	9	5	1	0	2	6	6	8	2	2	3	1	0	0	1	0	1	0	0	2	10	3	7
16S_OTU01024	Bacteria	Rokubacteria	NC10	Rokubacteriales	unclassified	unclassified	14.3494	0.121507	0.0007	0.00218893	-0.530555	0.530555	0.590305	1.05559	493	0.000401535	3	4	0	7	4	2	6	6	3	1	8	8	1	0	1	3	6	3	24	12	21	10	10	13	25	27	31	9	8	24	31	42	43
16S_OTU01037	Bacteria	Firmicutes	Erysipelotrichia	Erysipelotrichales	Erysipelotrichaceae	Turicibacter	16.4407	0.192888	0.0007	0.00218893	-0.28727	0.28727	0.655174	1.20616	131	0.000106696	5	3	7	9	18	10	9	14	8	0	1	3	4	0	3	0	3	0	4	1	0	0	0	0	3	6	3	5	2	2	1	2	0
16S_OTU01371	Bacteria	Proteobacteria	Gammaproteobacteria	Betaproteobacteriales	Nitrosomonadaceae	MND1	12.2025	0.137851	0.0007	0.00218893	-0.303242	0.303242	0.639189	1.20645	550	0.00044796	23	14	10	13	23	13	23	27	23	5	16	14	16	13	19	34	27	53	10	7	8	1	0	0	15	19	8	17	14	10	13	22	7
16S_OTU01858	Bacteria	Elusimicrobia	Lineage_IIb	unclassified	unclassified	unclassified	12.8372	0.262525	0.0007	0.00218893	0.174315	-0.174315	1.15845	0.807764	142	0.000115655	0	2	6	3	5	5	6	5	6	16	5	3	11	8	9	3	7	3	1	0	2	0	0	1	1	4	0	8	7	2	3	1	3
16S_OTU02054	Bacteria	Planctomycetes	Phycisphaerae	unclassified	unclassified	unclassified	12.9257	0.210746	0.0007	0.00218893	0.443069	-0.443069	0.763965	1.0293	26	2.11763e-05	0	0	1	2	0	0	1	0	1	0	2	0	1	0	0	2	1	1	0	0	0	0	0	0	0	1	0	2	2	4	2	1	0
16S_OTU02126	Bacteria	Planctomycetes	Phycisphaerae	Tepidisphaerales	WD2101_soil_group	unclassified	10.1924	0.201738	0.0007	0.00218893	0.140568	-0.140568	1.02699	0.980957	51	4.15381e-05	0	0	0	0	0	0	0	0	0	0	0	0	0	0	0	0	0	14	0	0	0	0	1	1	0	0	0	0	0	2	4	8	5
16S_OTU02158	Bacteria	Planctomycetes	Planctomycetacia	Gemmatales	Gemmataceae	Gemmata	14.4811	0.206174	0.0007	0.00218893	-0.282296	0.282296	0.978575	0.965638	55	4.4796e-05	0	0	0	1	0	0	0	0	1	0	12	2	1	1	0	12	8	7	0	0	0	0	0	0	1	0	0	5	4	0	0	0	0
16S_OTU02214	Bacteria	Bacteroidetes	Bacteroidia	Sphingobacteriales	Sphingobacteriaceae	Pedobacter	8.0438	0.123375	0.0007	0.00218893	-0.588745	0.588745	0.767314	0.857923	184	0.000149863	0	1	4	0	4	3	4	5	2	9	24	52	12	14	8	4	2	7	1	1	1	8	1	2	0	3	1	2	2	4	0	1	0
16S_OTU02220	Bacteria	Firmicutes	Clostridia	Clostridiales	Heliobacteriaceae	Hydrogenispora	11.9693	0.194493	0.0007	0.00218893	-0.10352	0.10352	0.590144	1.29918	69	5.61986e-05	3	1	5	5	5	2	11	5	6	0	1	0	2	4	1	1	1	2	2	1	1	0	1	1	0	0	3	0	0	0	2	1	0
16S_OTU02313	Bacteria	Planctomycetes	Phycisphaerae	S-70	unclassified	unclassified	16.7389	0.223039	0.0007	0.00218893	0.452264	-0.452264	1.22869	0.340589	37	3.01355e-05	0	0	0	0	2	3	2	2	1	0	1	1	3	2	3	3	2	4	0	0	0	0	0	0	0	0	0	2	0	3	1	1	1
16S_OTU02424	Bacteria	Acidobacteria	Subgroup_22	unclassified	unclassified	unclassified	9.55974	0.122903	0.0007	0.00218893	0.473406	-0.473406	0.787727	0.98169	40	3.25789e-05	0	0	0	0	0	0	0	0	0	0	0	0	0	0	0	0	0	0	2	3	0	0	2	1	0	0	0	1	0	1	6	4	0
16S_OTU02683	Bacteria	Cyanobacteria	Sericytochromatia	unclassified	unclassified	unclassified	16.5651	0.277741	0.0007	0.00218893	0.595377	-0.595377	1.09098	0.34343	98	7.98183e-05	5	3	12	5	3	5	2	4	5	0	0	2	2	1	0	2	0	0	6	0	4	5	5	5	3	1	1	5	3	2	1	1	0
16S_OTU02844	Bacteria	Patescibacteria	Parcubacteria	unclassified	unclassified	unclassified	14.3116	0.300113	0.0007	0.00218893	-0.648446	0.648446	0.630442	0.878029	168	0.000136831	8	1	1	0	2	1	2	5	12	1	8	8	3	6	3	10	6	11	1	3	6	0	0	2	4	3	3	10	9	4	5	13	2
16S_OTU02941	Bacteria	Planctomycetes	Phycisphaerae	Phycisphaerales	Phycisphaeraceae	SM1A02	13.2495	0.218134	0.0007	0.00218893	0.308904	-0.308904	1.02879	0.893501	16	1.30316e-05	0	0	0	0	0	0	1	0	2	0	0	1	1	1	1	2	1	2	0	0	0	0	0	0	0	0	0	2	1	0	0	0	0
16S_OTU03166	Bacteria	unclassified	unclassified	unclassified	unclassified	unclassified	14.5169	0.127275	0.0007	0.00218893	-0.50184	0.50184	0.174014	1.22279	163	0.000132759	4	4	0	25	21	10	7	8	8	5	1	4	4	5	1	3	6	4	1	4	0	4	5	13	1	0	1	1	2	3	0	2	2
16S_OTU03730	Bacteria	Verrucomicrobia	Verrucomicrobiae	Chthoniobacterales	Chthoniobacteraceae	Candidatus_Udaeobacter	12.3689	0.140775	0.0007	0.00218893	0.234447	-0.234447	1.24909	0.618229	545	0.000443888	25	46	47	31	34	27	58	39	50	16	6	11	20	18	24	23	36	23	0	0	0	0	0	0	0	0	0	6	2	0	0	1	0
16S_OTU03795	Bacteria	Verrucomicrobia	Verrucomicrobiae	Pedosphaerales	Pedosphaeraceae	unclassified	12.3903	0.182341	0.0007	0.00218893	-0.445459	0.445459	0.95363	0.853932	241	0.000196288	0	0	0	2	0	1	3	2	0	0	0	3	2	0	1	0	0	0	16	14	7	8	11	31	23	33	17	2	4	5	12	9	11
16S_OTU05490	Bacteria	Proteobacteria	Deltaproteobacteria	Myxococcales	Haliangiaceae	Haliangium	11.7093	0.139548	0.0007	0.00218893	0.145795	-0.145795	0.791599	1.17779	25	2.03618e-05	0	0	0	0	1	0	0	0	0	0	0	0	0	0	0	1	0	1	1	2	3	0	0	2	2	4	5	0	0	0	1	0	1
16S_OTU05902	Bacteria	Bacteroidetes	Bacteroidia	Cytophagales	Microscillaceae	unclassified	12.7563	0.158828	0.0007	0.00218893	0.342711	-0.342711	1.29933	0.349081	80	6.51578e-05	0	0	0	1	1	2	0	1	0	0	0	0	0	0	0	3	1	3	2	2	0	0	0	0	2	4	7	1	2	3	13	3	11
16S_OTU07450	Bacteria	Actinobacteria	Thermoleophilia	Solirubrobacterales	67-14	unclassified	11.2911	0.169863	0.0007	0.00218893	-0.63366	0.63366	0.348836	1.04252	16	1.30316e-05	1	2	1	1	1	0	4	1	3	1	0	0	0	0	1	0	0	0	0	0	0	0	0	0	0	0	0	0	0	0	0	0	0
16S_OTU00244	Bacteria	Planctomycetes	Phycisphaerae	Tepidisphaerales	WD2101_soil_group	unclassified	13.962	0.248551	0.0008	0.002442	-0.471808	0.471808	0.761982	1.0034	1003	0.000816916	14	14	10	18	6	12	22	14	15	3	17	8	5	4	10	12	8	14	83	49	53	41	53	65	43	76	48	25	74	31	27	30	42
16S_OTU00657	Bacteria	Acidobacteria	Subgroup_6	unclassified	unclassified	unclassified	12.7425	0.123833	0.0008	0.002442	-0.418912	0.418912	0.520374	1.19013	165	0.000134388	0	1	0	0	1	1	1	0	0	0	1	0	0	1	0	2	0	0	15	21	9	18	24	13	3	5	3	1	3	3	7	7	5
16S_OTU00721	Bacteria	Verrucomicrobia	Verrucomicrobiae	Pedosphaerales	Pedosphaeraceae	unclassified	10.3922	0.219902	0.0008	0.002442	-0.270262	0.270262	0.654342	1.2149	159	0.000129501	0	0	0	0	0	0	0	0	0	0	3	2	0	0	0	0	0	0	8	7	11	1	7	9	6	2	6	10	5	10	10	9	21
16S_OTU00855	Bacteria	Verrucomicrobia	Verrucomicrobiae	Chthoniobacterales	Chthoniobacteraceae	Chthoniobacter	13.2015	0.269097	0.0008	0.002442	0.0241392	-0.0241392	1.18008	0.815481	273	0.000222351	11	4	7	4	6	17	4	8	9	12	11	9	14	28	11	15	14	28	2	2	4	4	6	1	0	1	0	4	8	4	4	4	4
16S_OTU01033	Bacteria	Acidobacteria	Thermoanaerobaculia	Thermoanaerobaculales	Thermoanaerobaculaceae	Subgroup_10	12.9703	0.16232	0.0008	0.002442	0.438427	-0.438427	0.870242	0.945755	100	8.14473e-05	0	0	0	0	0	0	0	0	0	0	0	0	0	0	0	1	0	0	8	6	3	2	2	4	0	0	0	2	3	3	4	18	17
16S_OTU01070	Bacteria	Acidobacteria	Thermoanaerobaculia	Thermoanaerobaculales	Thermoanaerobaculaceae	Subgroup_10	13.8726	0.194518	0.0008	0.002442	0.352507	-0.352507	1.14828	0.690744	121	9.85512e-05	2	3	10	0	9	2	4	4	2	6	3	15	11	14	16	9	5	5	0	0	0	1	0	0	0	0	0	0	0	0	0	0	0
16S_OTU01298	Bacteria	Planctomycetes	vadinHA49	unclassified	unclassified	unclassified	15.0425	0.141788	0.0008	0.002442	-0.400173	0.400173	0.943487	0.91079	168	0.000136831	16	19	23	6	10	7	9	4	10	5	3	0	5	7	3	0	2	2	2	0	2	0	0	1	2	7	4	1	0	3	0	1	0
16S_OTU01850	Bacteria	Patescibacteria	Saccharimonadia	Saccharimonadales	unclassified	unclassified	13.7423	0.180005	0.0008	0.002442	-0.0536259	0.0536259	1.28121	0.641276	175	0.000142533	2	2	10	13	4	3	14	13	26	4	0	1	2	3	5	3	1	2	9	2	4	6	5	1	3	5	5	5	4	5	2	1	0
16S_OTU01894	Bacteria	Acidobacteria	Subgroup_6	unclassified	unclassified	unclassified	11.06	0.123012	0.0008	0.002442	-0.244707	0.244707	0.856513	1.09471	520	0.000423526	6	4	4	16	8	12	4	10	6	7	17	26	13	13	12	37	70	40	3	7	11	23	9	10	19	13	19	5	4	8	16	10	13
16S_OTU02072	Bacteria	Acidobacteria	Subgroup_6	unclassified	unclassified	unclassified	15.7581	0.245624	0.0008	0.002442	0.0593836	-0.0593836	0.758465	1.21494	256	0.000208505	9	11	14	7	5	4	3	3	2	7	3	8	3	3	1	7	4	3	9	15	20	7	13	14	17	7	10	7	10	3	10	4	6
16S_OTU02303	Bacteria	Patescibacteria	Parcubacteria	Candidatus_Nomurabacteria	unclassified	unclassified	14.7281	0.135111	0.0008	0.002442	-0.189861	0.189861	0.383542	1.35476	30	2.44342e-05	1	0	0	0	1	0	1	0	0	0	0	0	5	3	6	4	1	0	0	0	2	0	0	0	0	0	1	0	0	0	1	2	2
16S_OTU02347	Bacteria	Hydrogenedentes	Hydrogenedentia	Hydrogenedentiales	Hydrogenedensaceae	unclassified	14.3092	0.311381	0.0008	0.002442	0.103913	-0.103913	0.899858	1.10735	74	6.0271e-05	1	2	3	2	4	2	5	4	1	1	1	2	0	0	1	1	2	0	10	0	4	2	2	3	3	7	4	0	4	1	0	0	0
16S_OTU02409	Bacteria	Planctomycetes	Planctomycetacia	Pirellulales	Pirellulaceae	unclassified	13.7468	0.258103	0.0008	0.002442	-0.217891	0.217891	0.92178	1.0529	53	4.31671e-05	2	0	0	1	2	3	2	0	4	4	1	3	4	3	7	4	2	3	0	0	1	0	0	0	1	0	0	1	1	1	0	0	2
16S_OTU02470	Bacteria	Acidobacteria	Subgroup_6	unclassified	unclassified	unclassified	15.9783	0.236569	0.0008	0.002442	-0.733637	0.733637	0.315472	0.905281	95	7.73749e-05	0	1	7	4	4	4	0	3	0	2	1	1	3	5	5	2	2	1	1	1	0	1	1	1	0	0	0	0	2	8	6	5	3
16S_OTU02508	Bacteria	Planctomycetes	Planctomycetacia	Gemmatales	Gemmataceae	unclassified	14.6998	0.308741	0.0008	0.002442	-0.00702726	0.00702726	1.09677	0.925104	87	7.08591e-05	1	1	1	1	4	1	2	1	2	7	0	4	4	2	3	2	1	2	0	2	4	1	0	3	2	1	1	2	1	5	5	4	2
16S_OTU02704	Bacteria	Proteobacteria	Alphaproteobacteria	Rhodospirillales	Rhodospirillaceae	unclassified	15.9723	0.277239	0.0008	0.002442	0.264757	-0.264757	1.2806	0.52005	248	0.000201989	10	13	14	10	12	14	13	14	18	10	4	10	4	5	6	9	7	10	9	6	4	6	2	3	5	2	4	3	4	5	1	2	0
16S_OTU03034	Bacteria	Chloroflexi	Ktedonobacteria	C0119	unclassified	unclassified	7.74556	0.165984	0.0008	0.002442	-0.236919	0.236919	0.510069	1.29607	42	3.42079e-05	4	3	4	2	2	3	3	10	2	1	0	0	3	2	1	0	0	1	0	0	0	0	0	0	0	1	0	0	0	0	0	0	0
16S_OTU03497	Bacteria	Proteobacteria	Alphaproteobacteria	unclassified	unclassified	unclassified	12.9113	0.230183	0.0008	0.002442	0.00877854	-0.00877854	0.984622	1.04364	16	1.30316e-05	0	0	0	0	0	0	1	0	0	0	0	0	0	0	0	0	0	0	0	0	0	1	0	0	0	0	1	1	2	1	1	3	1
16S_OTU05260	Bacteria	Planctomycetes	Planctomycetacia	Gemmatales	Gemmataceae	unclassified	11.9168	0.16575	0.0008	0.002442	0.490622	-0.490622	0.946425	0.80831	16	1.30316e-05	0	0	0	0	0	0	0	0	0	0	0	0	0	0	0	0	0	0	0	0	1	0	0	0	0	1	1	0	0	1	1	2	3
16S_OTU06600	Bacteria	Bacteroidetes	Bacteroidia	Chitinophagales	Chitinophagaceae	Segetibacter	15.7865	0.235347	0.0008	0.002442	0.0247269	-0.0247269	1.17371	0.824579	35	2.85065e-05	1	0	1	7	2	4	1	4	2	0	0	0	2	1	0	0	0	0	0	2	0	4	0	4	0	0	0	0	0	0	0	0	0
16S_OTU08122	Bacteria	Cyanobacteria	Oxyphotobacteria	Chloroplast	unclassified	unclassified	11.9814	0.188515	0.0008	0.002442	0.0330216	-0.0330216	1.13782	0.872854	41	3.33934e-05	1	0	1	5	9	1	4	6	3	0	0	0	0	1	0	0	1	0	2	3	0	0	0	0	0	0	1	1	1	0	0	0	1
16S_OTU00470	Bacteria	Patescibacteria	ABY1	Candidatus_Magasanikbacteria	unclassified	unclassified	10.5058	0.172107	0.0009	0.0026744	0.0421073	-0.0421073	1.06632	0.958144	233	0.000189772	4	7	20	6	19	26	0	2	4	5	4	4	5	1	3	3	3	2	9	2	11	1	4	2	37	21	8	3	2	2	0	11	0
16S_OTU00572	Bacteria	Planctomycetes	Phycisphaerae	Tepidisphaerales	WD2101_soil_group	unclassified	14.118	0.142109	0.0009	0.0026744	-0.395898	0.395898	0.900741	0.956858	187	0.000152306	0	0	0	0	0	0	0	0	0	0	0	0	0	0	0	0	0	0	10	11	3	3	8	15	0	0	0	2	1	9	32	15	5
16S_OTU00606	Bacteria	Proteobacteria	Gammaproteobacteria	Betaproteobacteriales	A21b	unclassified	13.9674	0.221231	0.0009	0.0026744	0.231025	-0.231025	1.27305	0.570208	629	0.000512303	17	15	27	24	13	14	23	26	26	10	23	26	23	12	9	19	11	10	26	26	31	20	31	32	6	11	27	9	15	7	10	10	11
16S_OTU00634	Bacteria	Proteobacteria	Alphaproteobacteria	Reyranellales	Reyranellaceae	unclassified	11.9144	0.202374	0.0009	0.0026744	-0.000487821	0.000487821	1.01599	1.0132	134	0.000109139	0	0	1	0	1	2	4	2	1	0	1	1	0	0	1	1	0	0	27	2	10	3	7	2	9	22	17	3	1	1	4	2	3
16S_OTU00777	Bacteria	Chloroflexi	Chloroflexia	Chloroflexales	Herpetosiphonaceae	Herpetosiphon	13.4349	0.202321	0.0009	0.0026744	0.351577	-0.351577	0.961793	0.933822	159	0.000129501	0	0	1	0	1	0	0	0	0	0	0	0	0	0	0	0	0	0	18	15	7	15	14	27	3	10	11	1	19	2	6	0	1
16S_OTU00867	Bacteria	Chloroflexi	Anaerolineae	RBG-13-54-9	unclassified	unclassified	15.9701	0.210387	0.0009	0.0026744	-0.388213	0.388213	0.633983	1.15661	101	8.22618e-05	3	0	0	2	2	3	14	13	4	0	3	0	0	0	0	1	1	1	7	1	0	3	2	1	6	15	7	0	4	3	0	2	1
16S_OTU00905	Bacteria	Proteobacteria	Gammaproteobacteria	Betaproteobacteriales	SC-I-84	unclassified	14.3938	0.155015	0.0009	0.0026744	0.310529	-0.310529	1.00151	0.92282	527	0.000429227	0	0	0	0	1	0	0	0	0	0	0	1	0	0	0	0	0	0	18	12	5	11	16	32	22	38	27	4	7	37	68	42	43
16S_OTU01226	Bacteria	Chloroflexi	OLB14	unclassified	unclassified	unclassified	13.2679	0.195247	0.0009	0.0026744	-0.136985	0.136985	0.944875	1.06127	60	4.88684e-05	0	0	0	0	0	0	0	0	0	0	0	0	0	0	0	0	0	0	2	1	0	1	4	4	2	0	5	3	5	4	5	5	1
16S_OTU01244	Bacteria	Chloroflexi	Anaerolineae	SBR1031	A4b	unclassified	12.861	0.166615	0.0009	0.0026744	-0.397809	0.397809	0.655732	1.13742	77	6.27144e-05	0	0	0	0	0	0	0	0	0	0	0	0	0	0	0	3	0	0	2	1	2	0	1	2	0	0	9	1	1	2	9	9	6
16S_OTU01559	Bacteria	Cyanobacteria	Oxyphotobacteria	Oxyphotobacteria_Incertae_Sedis	Oxyphotobacteria_Incertae_Sedis_Unknown_Family	Phormidium_CYN64	6.56065	0.137635	0.0009	0.0026744	-0.37945	0.37945	0.615367	1.17271	61	4.96828e-05	0	0	2	23	5	2	2	2	6	0	1	0	1	0	0	0	0	3	0	2	0	3	3	4	0	0	1	0	0	0	0	0	0
16S_OTU01653	Bacteria	Acidobacteria	Holophagae	Subgroup_7	unclassified	unclassified	14.9043	0.154455	0.0009	0.0026744	0.161615	-0.161615	1.25907	0.646724	312	0.000254116	5	7	7	9	6	3	5	19	10	2	9	5	10	5	7	16	17	17	6	9	9	7	8	8	4	4	6	17	17	15	10	9	5
16S_OTU01670	Bacteria	Planctomycetes	Planctomycetacia	Gemmatales	Gemmataceae	unclassified	10.621	0.123114	0.0009	0.0026744	-0.186802	0.186802	0.823113	1.14342	66	5.37552e-05	0	0	0	0	0	0	0	0	0	0	1	0	0	0	0	0	0	0	6	5	1	0	3	3	0	0	0	1	0	1	7	7	13
16S_OTU01833	Bacteria	Proteobacteria	Alphaproteobacteria	Micropepsales	Micropepsaceae	unclassified	16.3206	0.275787	0.0009	0.0026744	-0.347539	0.347539	0.670795	1.16322	41	3.33934e-05	6	4	4	9	2	2	3	0	2	2	0	0	0	0	0	0	0	0	0	0	0	1	5	1	0	0	0	0	0	0	0	0	0
16S_OTU02042	Bacteria	Planctomycetes	Planctomycetacia	Pirellulales	Pirellulaceae	Pirellula	13.8987	0.209245	0.0009	0.0026744	0.194732	-0.194732	0.71124	1.21353	93	7.5746e-05	3	3	9	1	3	4	5	6	1	0	1	1	0	0	2	1	2	2	8	8	4	6	2	3	1	0	2	5	4	3	0	0	1
16S_OTU02718	Bacteria	Acidobacteria	Holophagae	Subgroup_7	unclassified	unclassified	14.1976	0.201402	0.0009	0.0026744	0.64133	-0.64133	0.991064	0.453452	143	0.00011647	0	0	0	0	0	0	2	2	2	0	0	2	0	0	0	5	3	2	7	4	10	4	4	5	4	1	2	1	2	11	13	9	17
16S_OTU03281	Bacteria	Gemmatimonadetes	S0134_terrestrial_group	unclassified	unclassified	unclassified	8.65541	0.123882	0.0009	0.0026744	0.609403	-0.609403	1.03989	0.43705	35	2.85065e-05	0	0	0	0	0	0	0	0	0	0	0	0	0	0	0	0	0	0	0	1	0	0	1	0	0	1	1	0	0	0	13	2	6
16S_OTU03340	Bacteria	Verrucomicrobia	Verrucomicrobiae	Pedosphaerales	Pedosphaeraceae	unclassified	12.0977	0.248665	0.0009	0.0026744	0.0938663	-0.0938663	1.05969	0.957713	74	6.0271e-05	0	0	0	0	2	1	0	2	1	0	3	0	2	1	8	1	1	2	3	2	3	0	2	1	3	1	1	2	5	1	6	2	3
16S_OTU03591	Bacteria	Cyanobacteria	Melainabacteria	Obscuribacterales	unclassified	unclassified	10.1775	0.14178	0.0009	0.0026744	-0.405689	0.405689	0.517602	1.20099	26	2.11763e-05	1	1	0	0	1	0	0	0	0	0	0	0	0	0	0	0	0	1	7	2	3	0	0	0	2	4	1	0	0	0	1	0	0
16S_OTU04123	Bacteria	Patescibacteria	Parcubacteria	unclassified	unclassified	unclassified	12.7791	0.217217	0.0009	0.0026744	-0.194174	0.194174	0.985099	1.00427	54	4.39815e-05	3	9	8	1	4	3	5	3	6	0	2	0	2	0	1	0	3	3	0	0	0	0	0	1	0	0	0	0	0	0	0	0	0
16S_OTU04404	Bacteria	Planctomycetes	Planctomycetacia	Gemmatales	Gemmataceae	unclassified	12.1054	0.181062	0.0009	0.0026744	0.0404087	-0.0404087	0.89107	1.1231	50	4.07236e-05	0	0	0	0	0	0	0	0	0	0	0	0	0	0	0	0	0	0	2	4	1	2	2	1	0	0	0	2	2	2	7	5	3
16S_OTU04798	Bacteria	Proteobacteria	Gammaproteobacteria	Gammaproteobacteria_Incertae_Sedis	Gammaproteobacteria_Incertae_Sedis_Unknown_Family	Candidatus_Ovatusbacter	14.086	0.297081	0.0009	0.0026744	-0.297581	0.297581	0.839313	1.08021	54	4.39815e-05	5	3	3	2	4	1	3	4	3	1	0	1	2	0	1	0	0	0	2	1	2	4	1	2	1	0	1	0	2	0	0	3	0
16S_OTU05093	Bacteria	Planctomycetes	Phycisphaerae	mle1-8	unclassified	unclassified	9.77651	0.153498	0.0009	0.0026744	0.35447	-0.35447	1.18927	0.615124	18	1.46605e-05	0	0	0	1	0	0	0	1	0	0	0	2	0	0	0	1	0	0	0	0	0	0	0	0	0	0	0	3	1	5	1	0	1
16S_OTU05555	Bacteria	Verrucomicrobia	Verrucomicrobiae	Opitutales	Opitutaceae	unclassified	13.077	0.223381	0.0009	0.0026744	-0.462208	0.462208	0.98222	0.801038	640	0.000521263	27	31	18	31	20	22	40	22	28	10	21	23	12	12	10	10	29	12	11	29	6	43	19	42	13	13	11	8	9	6	8	7	14
16S_OTU07045	Bacteria	Planctomycetes	Phycisphaerae	Tepidisphaerales	WD2101_soil_group	unclassified	15.1348	0.123172	0.0009	0.0026744	0.161226	-0.161226	0.909085	1.08505	452	0.000368142	8	6	7	19	17	20	9	12	5	17	9	19	19	12	15	15	9	7	20	11	12	3	3	5	8	14	19	18	28	25	16	18	9
16S_OTU00377	Bacteria	Latescibacteria	unclassified	unclassified	unclassified	unclassified	14.1666	0.232514	0.001	0.00287621	0.301218	-0.301218	1.07494	0.843323	237	0.00019303	26	16	32	7	17	19	22	11	22	13	6	15	1	8	7	4	7	3	0	0	0	0	0	0	1	0	0	0	0	0	0	0	0
16S_OTU00698	Bacteria	Chloroflexi	KD4-96	unclassified	unclassified	unclassified	13.2139	0.120876	0.001	0.00287621	0.175898	-0.175898	0.772313	1.18188	866	0.000705333	63	47	63	22	22	15	7	19	8	22	23	11	14	17	31	22	9	13	31	16	46	13	22	19	44	40	44	9	16	8	25	14	19
16S_OTU00771	Bacteria	Bacteroidetes	Bacteroidia	Cytophagales	Microscillaceae	unclassified	12.8306	0.12796	0.001	0.00287621	0.0276894	-0.0276894	0.752875	1.22081	357	0.000290767	9	10	10	13	20	17	13	19	20	12	6	11	41	25	12	51	26	42	0	0	0	0	0	0	0	0	0	0	0	0	0	0	0
16S_OTU00781	Bacteria	Acidobacteria	Subgroup_6	unclassified	unclassified	unclassified	13.7806	0.227987	0.001	0.00287621	0.580626	-0.580626	0.97202	0.632523	368	0.000299726	9	22	17	9	14	6	10	8	8	10	7	17	12	9	7	4	8	7	2	1	6	1	8	8	5	5	7	4	18	17	26	23	12
16S_OTU00908	Bacteria	Verrucomicrobia	Verrucomicrobiae	Chthoniobacterales	Chthoniobacteraceae	Chthoniobacter	13.7887	0.162773	0.001	0.00287621	0.316297	-0.316297	1.20835	0.621983	760	0.000618999	7	19	16	22	10	10	22	16	15	22	34	28	17	16	23	14	17	23	27	29	16	19	19	24	24	34	21	29	43	27	22	30	26
16S_OTU01141	Bacteria	Chloroflexi	Anaerolineae	SBR1031	unclassified	unclassified	11.7618	0.18953	0.001	0.00287621	0.611497	-0.611497	1.00968	0.497512	178	0.000144976	0	0	0	1	0	0	0	0	1	0	1	0	1	0	0	0	0	0	17	6	7	7	9	11	6	2	2	8	11	11	15	7	16
16S_OTU01431	Bacteria	Chloroflexi	Chloroflexia	Kallotenuales	AKIW781	unclassified	9.28835	0.141009	0.001	0.00287621	-0.459124	0.459124	0.806285	0.980989	76	6.18999e-05	0	0	0	0	0	0	0	0	0	0	0	0	0	0	0	0	0	0	6	5	2	0	1	6	0	3	2	2	6	5	9	6	13
16S_OTU01497	Bacteria	Planctomycetes	Planctomycetacia	Pirellulales	Pirellulaceae	Pirellula	13.0662	0.212795	0.001	0.00287621	0.274683	-0.274683	1.27624	0.519858	402	0.000327418	14	18	17	13	18	14	25	11	15	8	1	13	9	17	3	14	11	9	8	15	7	14	15	29	12	11	8	14	14	7	4	4	6
16S_OTU01608	Bacteria	Proteobacteria	Gammaproteobacteria	Coxiellales	Coxiellaceae	Coxiella	13.8256	0.222029	0.001	0.00287621	0.595676	-0.595676	1.03087	0.494698	108	8.79631e-05	4	13	10	4	10	2	13	7	9	2	0	3	4	1	3	2	1	1	2	2	1	0	1	2	1	0	0	0	1	0	3	2	1
16S_OTU01644	Bacteria	Proteobacteria	Alphaproteobacteria	Rhizobiales	Rhizobiales_Incertae_Sedis	unclassified	13.807	0.218404	0.001	0.00287621	0.423374	-0.423374	1.1357	0.624036	160	0.000130316	2	7	10	6	4	3	13	4	5	7	2	2	2	2	1	0	1	1	9	11	3	8	8	15	0	1	5	5	7	3	4	1	2
16S_OTU01771	Bacteria	Proteobacteria	Alphaproteobacteria	Sphingomonadales	Sphingomonadaceae	Sphingorhabdus	12.3395	0.134212	0.001	0.00287621	-0.451286	0.451286	0.4417	1.19685	169	0.000137646	0	0	0	3	3	0	1	2	1	0	3	2	0	0	0	3	1	0	11	7	3	12	12	22	10	10	12	6	4	6	5	2	6
16S_OTU01943	Bacteria	Planctomycetes	Planctomycetacia	Planctomycetales	unclassified	unclassified	12.5706	0.0947461	0.001	0.00287621	-0.0963601	0.0963601	0.791596	1.1885	63	5.13118e-05	0	0	0	0	0	0	0	0	0	0	0	0	0	0	0	0	0	0	3	2	2	0	0	7	11	12	11	0	0	1	7	2	0
16S_OTU02093	Bacteria	Proteobacteria	Alphaproteobacteria	Rhizobiales	Devosiaceae	Devosia	14.1288	0.191865	0.001	0.00287621	-0.284796	0.284796	0.957515	0.985002	81	6.59723e-05	0	0	3	1	3	0	1	5	2	1	5	3	0	1	2	1	1	3	8	4	1	6	2	2	9	6	8	0	1	1	0	0	0
16S_OTU02517	Bacteria	Verrucomicrobia	Verrucomicrobiae	Pedosphaerales	Pedosphaeraceae	unclassified	12.121	0.239026	0.001	0.00287621	0.387941	-0.387941	1.1654	0.61803	149	0.000121356	2	5	1	3	2	3	2	1	2	2	10	4	4	1	5	5	9	7	4	1	10	1	2	1	4	2	2	12	4	13	5	7	0
16S_OTU02605	Bacteria	Patescibacteria	Parcubacteria	Candidatus_Nomurabacteria	unclassified	unclassified	14.2033	0.21646	0.001	0.00287621	-0.459899	0.459899	0.627564	1.10322	673	0.00054814	15	17	7	11	18	15	10	37	39	6	13	14	22	41	19	44	51	35	7	3	13	6	2	9	26	7	17	24	13	28	23	25	5
16S_OTU02646	Bacteria	Planctomycetes	Pla4_lineage	unclassified	unclassified	unclassified	12.6629	0.12719	0.001	0.00287621	0.00422821	-0.00422821	1.02578	1.00328	40	3.25789e-05	0	0	0	0	0	0	0	0	0	0	0	0	0	0	0	0	0	0	3	2	0	0	1	1	1	0	1	0	0	0	6	1	7
16S_OTU02810	Bacteria	Acidobacteria	Acidobacteriia	Solibacterales	Solibacteraceae_(Subgroup_3)	Bryobacter	9.77152	0.184693	0.001	0.00287621	-0.338133	0.338133	0.695643	1.15446	22	1.79184e-05	0	0	0	0	0	0	0	0	0	0	0	0	0	0	0	0	0	0	1	2	0	0	0	0	0	0	0	0	1	2	2	1	6
16S_OTU02916	Bacteria	Proteobacteria	Gammaproteobacteria	Gammaproteobacteria_Incertae_Sedis	Gammaproteobacteria_Incertae_Sedis_Unknown_Family	Candidatus_Berkiella	13.854	0.243968	0.001	0.00287621	-0.32564	0.32564	1.117	0.765884	30	2.44342e-05	1	1	0	0	1	1	1	0	0	2	4	1	0	0	2	3	3	2	0	1	1	0	0	0	0	0	0	0	1	0	0	0	2
16S_OTU02928	Bacteria	Acidobacteria	Holophagae	Subgroup_7	unclassified	unclassified	14.7949	0.236851	0.001	0.00287621	-0.051209	0.051209	0.661314	1.27119	92	7.49315e-05	0	0	1	2	2	1	2	6	4	0	2	0	2	0	3	5	5	3	0	0	1	1	0	2	3	2	0	1	8	7	5	2	4
16S_OTU02977	Bacteria	Patescibacteria	Parcubacteria	Candidatus_Azambacteria	unclassified	unclassified	14.717	0.309309	0.001	0.00287621	0.668894	-0.668894	0.947844	0.461452	36	2.9321e-05	4	1	0	6	0	4	3	2	4	0	0	0	0	0	0	0	0	0	1	1	0	2	0	0	2	3	0	0	1	0	0	1	0
16S_OTU03118	Bacteria	Planctomycetes	vadinHA49	unclassified	unclassified	unclassified	12.988	0.285032	0.001	0.00287621	-0.266905	0.266905	1.04244	0.906244	65	5.29407e-05	1	3	0	6	3	2	0	4	2	4	3	4	3	3	4	6	3	3	0	0	1	0	0	0	0	0	1	0	2	1	0	2	1
16S_OTU03547	Bacteria	Chlamydiae	Chlamydiae	Chlamydiales	cvE6	unclassified	13.3565	0.191683	0.001	0.00287621	-0.142246	0.142246	1.15921	0.819882	40	3.25789e-05	4	2	8	4	7	4	1	0	3	3	0	0	0	0	0	1	2	0	0	0	0	0	0	0	0	1	0	0	0	0	0	0	0
16S_OTU03857	Bacteria	Planctomycetes	Planctomycetacia	Planctomycetales	unclassified	unclassified	8.18713	0.190786	0.001	0.00287621	-0.398327	0.398327	0.788184	1.04957	34	2.76921e-05	0	2	0	0	2	0	1	0	1	0	0	0	0	0	0	0	0	0	10	1	3	1	3	2	0	2	2	0	0	0	0	2	1
16S_OTU03858	Bacteria	Patescibacteria	Parcubacteria	Candidatus_Nomurabacteria	unclassified	unclassified	11.5395	0.265949	0.001	0.00287621	-0.0737901	0.0737901	0.901909	1.11079	44	3.58368e-05	1	0	0	1	2	1	1	1	1	2	2	9	1	4	2	2	6	3	0	0	0	0	0	0	0	0	0	2	1	0	1	0	0
16S_OTU03939	Bacteria	Patescibacteria	Parcubacteria	Candidatus_Nomurabacteria	unclassified	unclassified	12.0121	0.252193	0.001	0.00287621	-0.328162	0.328162	0.553057	1.23487	64	5.21263e-05	1	1	0	0	0	0	0	1	2	1	1	3	3	1	3	3	6	5	0	0	4	0	0	0	0	2	3	8	2	3	5	1	0
16S_OTU04624	Bacteria	Actinobacteria	Acidimicrobiia	unclassified	unclassified	unclassified	8.07917	0.193051	0.001	0.00287621	-0.526734	0.526734	0.618933	1.04317	19	1.5475e-05	0	2	7	1	2	1	2	1	1	0	1	0	0	0	0	0	0	0	0	0	0	0	1	0	0	0	0	0	0	0	0	0	0
16S_OTU04978	Bacteria	Verrucomicrobia	Verrucomicrobiae	Opitutales	Opitutaceae	Opitutus	12.8675	0.182404	0.001	0.00287621	0.0754919	-0.0754919	0.952346	1.06761	59	4.80539e-05	1	0	3	6	3	7	10	3	12	0	1	0	0	0	1	1	4	0	0	0	0	0	0	1	3	1	0	0	0	0	1	0	1
16S_OTU06122	Bacteria	Bacteroidetes	Bacteroidia	Cytophagales	Spirosomaceae	Spirosoma	5.53872	0.115014	0.001	0.00287621	0.520194	-0.520194	1.05508	0.610409	18	1.46605e-05	0	1	1	1	8	2	0	1	1	1	0	0	0	0	0	0	0	0	1	0	0	1	0	0	0	0	0	0	0	0	0	0	0
16S_OTU09055	Bacteria	Proteobacteria	Alphaproteobacteria	Micavibrionales	unclassified	unclassified	13.4276	0.16973	0.001	0.00287621	-0.284561	0.284561	0.911407	1.02795	20	1.62895e-05	0	0	0	0	0	0	1	1	2	0	0	0	0	1	1	2	2	2	0	0	0	0	1	0	0	0	0	0	1	0	0	0	2
16S_OTU09136	Bacteria	Armatimonadetes	Fimbriimonadia	Fimbriimonadales	Fimbriimonadaceae	unclassified	13.4209	0.231261	0.001	0.00287621	0.328518	-0.328518	1.29968	0.375637	145	0.000118099	4	3	8	9	10	10	11	5	3	2	1	0	1	3	6	2	5	5	9	3	9	5	12	3	0	2	1	5	4	0	0	0	4
16S_OTU00666	Bacteria	unclassified	unclassified	unclassified	unclassified	unclassified	10.7703	0.100444	0.0011	0.00310407	-0.194618	0.194618	0.855161	1.11683	129	0.000105067	0	0	0	0	0	0	0	0	0	0	0	0	0	0	0	0	0	0	12	22	26	4	13	20	0	0	0	2	3	2	6	4	5
16S_OTU00780	Bacteria	Proteobacteria	Gammaproteobacteria	Betaproteobacteriales	unclassified	unclassified	14.0997	0.181519	0.0011	0.00310407	0.29362	-0.29362	0.909999	1.0238	142	0.000115655	1	3	1	14	2	8	3	6	7	2	2	14	10	12	18	13	13	13	0	0	0	0	0	0	0	0	0	0	0	0	0	0	0
16S_OTU01088	Bacteria	Proteobacteria	Deltaproteobacteria	Myxococcales	Haliangiaceae	Haliangium	10.2795	0.12234	0.0011	0.00310407	-0.024616	0.024616	0.937317	1.08581	164	0.000133574	4	0	4	3	2	3	1	6	7	8	13	9	7	6	3	16	9	27	12	2	5	2	2	3	0	0	0	3	1	2	0	2	1
16S_OTU01598	Bacteria	Acidobacteria	Subgroup_6	unclassified	unclassified	unclassified	15.1405	0.140969	0.0011	0.00310407	-0.224992	0.224992	0.571167	1.27491	99	8.06328e-05	0	0	0	4	3	1	6	1	4	2	1	0	5	1	6	6	5	6	6	3	1	0	0	0	4	3	1	0	0	0	5	6	4
16S_OTU01916	Bacteria	Planctomycetes	Planctomycetacia	Pirellulales	Pirellulaceae	Pirellula	12.9437	0.2041	0.0011	0.00310407	-0.356354	0.356354	0.782718	1.08502	43	3.50223e-05	0	0	0	3	0	1	3	1	3	2	1	1	2	2	1	3	0	4	0	1	0	0	0	0	0	0	0	5	2	3	1	2	1
16S_OTU02046	Bacteria	Verrucomicrobia	Verrucomicrobiae	Pedosphaerales	Pedosphaeraceae	unclassified	14.2323	0.22835	0.0011	0.00310407	0.348662	-0.348662	1.20456	0.591968	140	0.000114026	5	3	8	2	3	4	2	1	2	2	3	7	9	4	8	7	8	7	0	0	7	0	2	1	3	3	3	7	13	3	2	2	0
16S_OTU02255	Bacteria	Firmicutes	Bacilli	Bacillales	Bacillaceae	Ureibacillus	10.8146	0.214016	0.0011	0.00310407	-0.433466	0.433466	0.976397	0.841179	43	3.50223e-05	2	4	1	2	3	6	2	4	3	1	1	2	0	0	0	1	0	1	0	0	1	1	0	1	1	1	1	0	0	0	1	1	0
16S_OTU02601	Bacteria	Patescibacteria	Saccharimonadia	Saccharimonadales	unclassified	unclassified	12.8151	0.194691	0.0011	0.00310407	-0.0181172	0.0181172	1.31205	0.580209	109	8.87775e-05	0	1	18	0	0	2	1	1	1	0	4	0	0	0	0	0	1	0	1	2	1	5	13	13	15	8	7	1	0	0	4	1	5
16S_OTU02824	Bacteria	Acidobacteria	Subgroup_6	unclassified	unclassified	unclassified	9.85114	0.0662439	0.0011	0.00310407	-0.186856	0.186856	0.965138	1.02635	121	9.85512e-05	0	0	0	0	0	0	0	0	0	0	0	0	0	0	0	0	0	0	8	7	2	2	4	2	18	27	14	0	0	1	10	7	5
16S_OTU03376	Bacteria	Proteobacteria	Alphaproteobacteria	unclassified	unclassified	unclassified	13.56	0.232046	0.0011	0.00310407	-0.352515	0.352515	0.818003	1.06139	58	4.72394e-05	0	4	1	1	0	0	0	1	4	1	2	2	4	0	5	0	2	0	0	0	0	0	0	0	0	0	0	0	1	1	8	1	8
16S_OTU03415	Bacteria	Proteobacteria	Deltaproteobacteria	Syntrophobacterales	Syntrophaceae	unclassified	7.40908	0.186169	0.0011	0.00310407	-0.389562	0.389562	0.724284	1.1013	33	2.68776e-05	0	0	0	2	0	0	0	1	0	2	2	0	2	2	3	10	0	3	0	0	0	0	0	0	0	0	1	1	0	0	1	1	0
16S_OTU04254	Bacteria	Patescibacteria	Saccharimonadia	Saccharimonadales	unclassified	unclassified	13.944	0.163275	0.0011	0.00310407	-0.654224	0.654224	0.644325	0.85866	53	4.31671e-05	1	1	0	0	2	1	1	2	0	0	4	1	0	0	0	1	0	0	3	3	3	1	1	2	7	7	5	0	3	0	0	0	1
16S_OTU04452	Bacteria	Actinobacteria	Acidimicrobiia	Microtrichales	Ilumatobacteraceae	unclassified	13.4036	0.273638	0.0011	0.00310407	-0.059822	0.059822	1.07099	0.950908	27	2.19908e-05	0	0	0	1	0	0	0	0	1	0	2	1	1	1	1	4	1	1	0	0	0	0	1	0	0	0	2	1	3	2	0	2	1
16S_OTU05030	Bacteria	Patescibacteria	Parcubacteria	Candidatus_Nomurabacteria	unclassified	unclassified	11.9233	0.238537	0.0011	0.00310407	0.063191	-0.063191	1.15838	0.841744	19	1.5475e-05	0	0	0	0	1	0	0	0	0	0	0	0	1	0	0	3	0	1	0	0	0	0	0	0	0	0	0	0	0	3	2	1	0
16S_OTU05450	Bacteria	Acidobacteria	Acidobacteriia	Acidobacteriales	Acidobacteriaceae_(Subgroup_1)	Granulicella	12.0832	0.221806	0.0011	0.00310407	0.0697019	-0.0697019	1.15471	0.845678	29	2.36197e-05	6	2	2	3	4	1	2	4	1	1	2	1	0	0	0	0	0	0	0	0	0	0	0	0	0	0	0	0	0	0	0	0	0
16S_OTU05708	Bacteria	Bacteroidetes	Bacteroidia	Chitinophagales	Chitinophagaceae	Niastella	9.98563	0.122958	0.0011	0.00310407	0.13874	-0.13874	1.06069	0.944988	55	4.4796e-05	1	3	3	3	2	3	2	0	3	1	2	3	3	3	1	2	1	0	1	2	0	3	6	4	1	1	0	0	0	0	0	0	1
16S_OTU06664	Bacteria	Proteobacteria	Gammaproteobacteria	PLTA13	unclassified	unclassified	13.8478	0.202049	0.0011	0.00310407	-0.450896	0.450896	0.440979	1.19743	854	0.00069556	7	3	1	30	3	12	9	12	25	2	9	9	8	0	3	26	40	12	27	43	28	12	35	31	22	10	27	29	27	48	53	51	27
16S_OTU09316	Bacteria	Bacteroidetes	Bacteroidia	Cytophagales	Microscillaceae	Ohtaekwangia	12.902	0.135651	0.0011	0.00310407	0.505838	-0.505838	0.999004	0.720394	89	7.24881e-05	0	0	2	0	0	0	0	1	4	0	0	0	0	0	0	1	0	0	10	5	9	0	1	4	8	10	8	3	5	3	7	3	1
16S_OTU00054	Bacteria	Acidobacteria	Acidobacteriia	Solibacterales	Solibacteraceae_(Subgroup_3)	Paludibaculum	11.7845	0.277575	0.0012	0.00330646	0.537731	-0.537731	1.09307	0.5017	979	0.000797369	4	7	4	5	11	11	18	14	14	15	17	19	9	16	19	26	12	36	46	35	45	22	23	31	32	48	27	24	77	29	45	47	42
16S_OTU00305	Bacteria	Planctomycetes	OM190	unclassified	unclassified	unclassified	13.4128	0.171598	0.0012	0.00330646	-0.24087	0.24087	0.88237	1.07582	702	0.00057176	9	13	5	4	2	6	11	12	15	8	8	10	7	8	6	9	15	4	34	28	48	9	12	23	33	31	18	17	35	28	47	36	39
16S_OTU00323	Bacteria	Bacteroidetes	Bacteroidia	Chitinophagales	Chitinophagaceae	Terrimonas	14.2453	0.161716	0.0012	0.00330646	-0.503131	0.503131	0.559455	1.0999	653	0.000531851	7	6	1	10	12	15	10	10	4	3	18	16	6	6	10	24	19	19	22	31	22	21	36	39	11	16	11	27	35	42	23	18	29
16S_OTU00459	Bacteria	Proteobacteria	Deltaproteobacteria	Myxococcales	bacteriap25	unclassified	11.2782	0.264216	0.0012	0.00330646	-0.0220034	0.0220034	0.779534	1.20421	977	0.00079574	25	18	12	14	8	18	1	8	8	11	29	37	14	6	15	14	22	19	26	40	44	27	34	20	16	22	24	37	30	86	62	80	27
16S_OTU00720	Bacteria	Acidobacteria	Subgroup_6	unclassified	unclassified	unclassified	10.7364	0.152374	0.0012	0.00330646	-0.19686	0.19686	0.923062	1.06052	365	0.000297283	0	0	1	3	3	1	6	3	5	0	5	2	0	0	0	3	1	2	24	16	13	21	22	12	33	41	27	3	23	11	13	17	14
16S_OTU00722	Bacteria	Patescibacteria	Parcubacteria	Candidatus_Yanofskybacteria	unclassified	unclassified	8.88645	0.131893	0.0012	0.00330646	0.277742	-0.277742	1.30944	0.425235	100	8.14473e-05	11	5	0	3	2	5	4	29	34	1	0	0	2	1	0	0	1	1	0	0	1	0	0	0	0	0	0	0	0	0	0	0	0
16S_OTU00819	Bacteria	Proteobacteria	Deltaproteobacteria	NB1-j	unclassified	unclassified	14.4906	0.174886	0.0012	0.00330646	0.523583	-0.523583	1.00919	0.678102	569	0.000463435	1	0	0	2	0	1	3	0	0	2	11	5	0	0	1	3	3	1	24	23	21	9	22	31	40	21	28	7	19	31	58	44	35
16S_OTU01038	Bacteria	Proteobacteria	Alphaproteobacteria	Sphingomonadales	Sphingomonadaceae	Sphingomonas	13.3582	0.258259	0.0012	0.00330646	-0.235702	0.235702	0.190082	1.38023	3248	0.00264541	77	84	72	47	57	47	53	32	34	22	71	31	28	31	33	48	25	70	195	167	115	126	119	195	141	206	157	81	148	92	143	103	123
16S_OTU01713	Bacteria	Acidobacteria	Acidobacteriia	Solibacterales	Solibacteraceae_(Subgroup_3)	Candidatus_Solibacter	12.6583	0.106603	0.0012	0.00330646	-0.079118	0.079118	0.862278	1.14107	102	8.30762e-05	6	6	4	1	3	0	1	6	1	2	2	1	2	3	5	2	1	1	1	2	2	2	3	2	1	0	0	0	2	3	7	4	2
16S_OTU01855	Bacteria	Proteobacteria	Deltaproteobacteria	unclassified	unclassified	unclassified	11.4304	0.22472	0.0012	0.00330646	0.394777	-0.394777	1.07406	0.758417	50	4.07236e-05	1	0	2	3	5	4	0	4	11	0	0	0	2	0	0	0	0	2	7	1	3	1	2	0	0	0	0	0	1	0	0	1	0
16S_OTU01904	Bacteria	Planctomycetes	Phycisphaerae	Phycisphaerales	Phycisphaeraceae	SM1A02	14.9795	0.327769	0.0012	0.00330646	0.078902	-0.078902	1.05109	0.969974	65	5.29407e-05	1	1	0	1	3	0	1	1	1	0	2	5	2	3	0	2	3	3	0	0	2	0	2	1	0	1	2	2	6	2	2	6	5
16S_OTU01985	Bacteria	Proteobacteria	Alphaproteobacteria	Caulobacterales	Caulobacteraceae	unclassified	13.516	0.191788	0.0012	0.00330646	0.0595632	-0.0595632	1.1412	0.865432	129	0.000105067	6	7	11	11	8	6	14	12	13	15	2	5	1	0	2	2	2	0	2	0	2	1	1	1	1	0	0	1	2	0	0	0	1
16S_OTU02201	Bacteria	Verrucomicrobia	Verrucomicrobiae	Pedosphaerales	Pedosphaeraceae	unclassified	11.6869	0.128575	0.0012	0.00330646	-0.501448	0.501448	0.693881	1.02219	50	4.07236e-05	0	0	0	4	2	4	8	4	12	3	2	1	0	2	0	0	0	2	0	0	0	0	0	0	3	3	0	0	0	0	0	0	0
16S_OTU02270	Bacteria	Chloroflexi	Anaerolineae	RBG-13-54-9	unclassified	unclassified	12.755	0.131393	0.0012	0.00330646	-0.319548	0.319548	0.9523	0.967322	34	2.76921e-05	0	0	0	0	0	0	0	0	0	0	0	0	0	0	0	0	0	0	3	3	0	0	2	1	0	0	0	1	0	0	3	4	6
16S_OTU02293	Bacteria	Bacteroidetes	Ignavibacteria	SJA-28	unclassified	unclassified	10.6068	0.169401	0.0012	0.00330646	-0.268771	0.268771	0.798009	1.12651	45	3.66513e-05	1	3	6	4	4	0	3	8	7	2	2	1	2	1	1	0	0	0	0	0	0	0	0	0	0	0	0	0	0	0	0	0	0
16S_OTU02397	Bacteria	Chloroflexi	Anaerolineae	SBR1031	unclassified	unclassified	12.9032	0.243716	0.0012	0.00330646	0.25637	-0.25637	0.889129	1.06259	63	5.13118e-05	0	0	0	0	0	0	0	0	0	0	0	0	0	0	0	0	1	0	0	1	0	1	0	2	0	0	8	4	5	4	6	8	4
16S_OTU03305	Bacteria	Actinobacteria	Thermoleophilia	Solirubrobacterales	Solirubrobacteraceae	Conexibacter	13.1649	0.331122	0.0012	0.00330646	-0.448543	0.448543	0.816485	0.982916	71	5.78276e-05	2	2	1	1	1	1	2	0	1	0	5	2	3	4	0	3	2	6	2	0	2	1	1	1	1	0	2	3	1	5	3	4	3
16S_OTU03756	Bacteria	Chloroflexi	Anaerolineae	Anaerolineales	Anaerolineaceae	Anaerolinea	11.206	0.156099	0.0012	0.00330646	0.0257213	-0.0257213	0.757575	1.21799	124	0.000100995	29	9	43	9	1	0	22	4	3	1	0	0	2	1	0	0	0	0	0	0	0	0	0	0	0	0	0	0	0	0	0	0	0
16S_OTU04050	Bacteria	Planctomycetes	Planctomycetacia	Pirellulales	Pirellulaceae	unclassified	12.4029	0.216618	0.0012	0.00330646	-0.209625	0.209625	0.749092	1.18517	33	2.68776e-05	0	0	0	0	0	0	0	0	0	0	0	3	0	0	0	0	0	0	2	0	1	0	0	0	0	0	0	0	0	3	3	3	8
16S_OTU04090	Bacteria	Proteobacteria	Deltaproteobacteria	Bdellovibrionales	Bdellovibrionaceae	Bdellovibrio	13.5796	0.206832	0.0012	0.00330646	0.189692	-0.189692	1.2024	0.732708	17	1.3846e-05	2	3	2	1	2	1	2	1	0	0	0	1	0	0	0	1	1	0	0	0	0	0	0	0	0	0	0	0	0	0	0	0	0
16S_OTU04103	Bacteria	Dependentiae	Babeliae	Babeliales	unclassified	unclassified	8.6703	0.205355	0.0012	0.00330646	0.0591348	-0.0591348	0.84519	1.15632	26	2.11763e-05	0	0	0	1	0	0	0	1	1	0	7	1	1	0	0	2	1	3	0	0	0	0	0	0	0	0	0	0	0	0	1	1	2
16S_OTU04335	Bacteria	unclassified	unclassified	unclassified	unclassified	unclassified	11.3565	0.178373	0.0012	0.00330646	0.229068	-0.229068	1.18777	0.732742	26	2.11763e-05	1	2	0	1	0	2	0	1	0	0	0	1	0	0	1	0	1	1	1	3	2	0	0	0	4	3	1	0	1	0	0	0	0
16S_OTU05311	Bacteria	Verrucomicrobia	Verrucomicrobiae	Chthoniobacterales	Chthoniobacteraceae	Candidatus_Udaeobacter	10.6482	0.162013	0.0012	0.00330646	0.214678	-0.214678	1.26394	0.603061	1357	0.00110524	66	57	51	84	59	75	27	65	52	45	60	105	120	91	78	76	66	68	1	0	24	0	0	1	15	7	9	28	10	15	0	2	0
16S_OTU01049	Bacteria	Proteobacteria	Alphaproteobacteria	Elsterales	unclassified	unclassified	12.298	0.247656	0.0013	0.00352423	0.252088	-0.252088	0.997508	0.963965	348	0.000283437	18	17	19	10	20	5	18	12	13	13	13	12	6	4	14	11	3	8	13	6	11	5	5	11	12	17	10	7	7	3	8	3	5
16S_OTU01360	Bacteria	Proteobacteria	Alphaproteobacteria	Rhodospirillales	AEGEAN-169_marine_group	unclassified	12.8694	0.260781	0.0013	0.00352423	-0.0273183	0.0273183	0.966291	1.05996	50	4.07236e-05	5	0	4	0	0	0	8	0	0	0	0	0	0	0	0	0	0	0	1	7	1	8	4	4	0	2	3	0	1	2	0	0	0
16S_OTU01562	Bacteria	Patescibacteria	Parcubacteria	unclassified	unclassified	unclassified	12.3302	0.257076	0.0013	0.00352423	0.58279	-0.58279	0.818602	0.81821	237	0.00019303	4	6	2	10	9	1	7	8	18	3	6	9	15	9	12	5	12	5	3	1	9	2	0	1	4	1	0	4	8	18	11	10	2
16S_OTU02031	Bacteria	Planctomycetes	Phycisphaerae	Phycisphaerales	Phycisphaeraceae	AKYG587	11.8491	0.15074	0.0013	0.00352423	-0.0430429	0.0430429	0.916912	1.10189	42	3.42079e-05	0	0	0	0	0	0	0	0	0	0	0	0	0	0	0	0	1	0	1	6	0	0	0	0	0	0	0	0	1	1	7	3	3
16S_OTU02071	Bacteria	Patescibacteria	Parcubacteria	Candidatus_Moranbacteria	unclassified	unclassified	13.7112	0.23709	0.0013	0.00352423	0.210476	-0.210476	0.779451	1.1651	43	3.50223e-05	2	5	2	3	3	5	2	6	8	0	2	1	0	2	1	0	1	0	0	0	0	0	0	0	0	0	0	0	0	0	0	0	0
16S_OTU02226	Bacteria	Proteobacteria	Deltaproteobacteria	Myxococcales	Haliangiaceae	Haliangium	11.5241	0.269008	0.0013	0.00352423	-0.362657	0.362657	0.979369	0.906171	118	9.61078e-05	0	0	1	0	0	0	0	0	0	0	2	0	3	2	1	2	3	3	3	6	7	1	7	4	3	2	6	9	4	12	9	7	5
16S_OTU02279	Bacteria	Firmicutes	Clostridia	Clostridiales	Clostridiaceae_1	Clostridium_sensu_stricto_1	8.87656	0.150994	0.0013	0.00352423	-0.360472	0.360472	0.385551	1.27867	60	4.88684e-05	0	1	1	0	1	0	10	1	4	1	1	0	0	1	0	0	0	1	1	1	0	12	5	4	4	2	3	0	0	0	2	1	0
16S_OTU03290	Bacteria	BRC1	unclassified	unclassified	unclassified	unclassified	14.0499	0.287079	0.0013	0.00352423	0.125782	-0.125782	1.21205	0.745823	44	3.58368e-05	2	3	3	3	2	2	2	3	3	0	0	1	0	0	2	0	1	0	1	1	3	3	0	1	0	2	0	0	0	0	1	1	0
16S_OTU03349	Bacteria	Gemmatimonadetes	Gemmatimonadetes	Gemmatimonadales	Gemmatimonadaceae	unclassified	12.8193	0.210004	0.0013	0.00352423	-0.0284354	0.0284354	1.04394	0.98351	21	1.71039e-05	0	0	0	0	0	0	0	0	0	0	1	1	0	0	0	0	0	0	2	1	0	0	1	0	0	0	0	0	0	2	3	3	2
16S_OTU03648	Bacteria	Dependentiae	Babeliae	Babeliales	unclassified	unclassified	9.79694	0.210521	0.0013	0.00352423	-0.494818	0.494818	0.657057	1.0529	23	1.87329e-05	1	1	2	0	1	0	7	0	3	0	0	0	0	0	0	0	0	0	2	0	4	1	0	0	1	0	0	0	0	0	0	0	0
16S_OTU03818	Bacteria	Chloroflexi	Anaerolineae	SBR1031	unclassified	unclassified	9.59929	0.181067	0.0013	0.00352423	-0.0480687	0.0480687	0.784005	1.19969	29	2.36197e-05	2	2	2	7	2	2	3	0	2	0	2	2	0	0	0	0	0	1	0	1	1	0	0	0	0	0	0	0	0	0	0	0	0
16S_OTU04270	Bacteria	Planctomycetes	Planctomycetacia	Planctomycetales	unclassified	unclassified	14.6067	0.158375	0.0013	0.00352423	-0.0334917	0.0334917	0.729411	1.23467	64	5.21263e-05	0	0	0	0	1	0	1	1	2	0	3	0	1	2	0	0	0	0	2	0	1	0	1	1	5	3	2	0	1	3	6	7	2
16S_OTU05781	Bacteria	Chloroflexi	Dehalococcoidia	S085	unclassified	unclassified	11.9236	0.223483	0.0013	0.00352423	-0.417314	0.417314	0.914474	0.923997	29	2.36197e-05	2	2	6	1	2	2	3	5	2	0	0	2	0	0	0	0	2	0	0	0	0	0	0	0	0	0	0	0	0	0	0	0	0
16S_OTU06153	Bacteria	Proteobacteria	Gammaproteobacteria	Betaproteobacteriales	Nitrosomonadaceae	MND1	12.7681	0.0738491	0.0013	0.00352423	0.453079	-0.453079	1.07669	0.681793	36	2.9321e-05	0	0	0	2	2	4	7	6	5	0	0	0	0	0	0	2	3	2	1	0	0	0	0	0	0	0	0	1	0	0	0	1	0
16S_OTU07721	Bacteria	Proteobacteria	Alphaproteobacteria	Rhizobiales	Devosiaceae	Devosia	7.77591	0.180443	0.0013	0.00352423	0.380918	-0.380918	1.1516	0.65221	105	8.55196e-05	3	6	6	22	4	5	7	3	2	1	5	4	1	3	1	0	0	4	5	1	2	3	3	5	1	1	1	0	1	0	1	2	0
16S_OTU09597	Bacteria	Patescibacteria	Gracilibacteria	Candidatus_Peribacteria	unclassified	unclassified	13.1665	0.191695	0.0013	0.00352423	-0.241316	0.241316	0.774426	1.15576	12	9.77367e-06	1	0	0	0	0	0	0	1	0	0	0	0	0	0	0	1	0	0	0	0	0	0	0	0	0	0	0	0	1	1	2	2	1
16S_OTU00812	Bacteria	Planctomycetes	Phycisphaerae	Tepidisphaerales	WD2101_soil_group	unclassified	13.6745	0.182715	0.0014	0.00373138	0.328279	-0.328279	1.25145	0.514279	173	0.000140904	5	3	12	11	9	9	4	6	6	3	4	3	12	2	7	11	5	15	0	1	0	0	0	0	0	0	0	5	12	9	2	7	2
16S_OTU00962	Bacteria	Chloroflexi	Anaerolineae	SBR1031	unclassified	unclassified	11.991	0.193261	0.0014	0.00373138	-0.555526	0.555526	0.741913	0.924588	102	8.30762e-05	0	0	0	0	0	0	0	2	2	0	1	0	0	0	0	1	0	2	8	1	4	1	0	1	3	8	6	5	5	7	12	6	6
16S_OTU01013	Bacteria	Planctomycetes	Phycisphaerae	Tepidisphaerales	WD2101_soil_group	unclassified	14.3157	0.211146	0.0014	0.00373138	0.181493	-0.181493	1.05494	0.936036	181	0.00014742	12	19	16	5	14	12	9	4	14	12	6	8	3	6	5	5	3	2	1	1	1	8	5	5	0	0	0	0	3	2	0	0	0
16S_OTU01162	Bacteria	Planctomycetes	Phycisphaerae	Tepidisphaerales	WD2101_soil_group	unclassified	11.7464	0.172424	0.0014	0.00373138	0.112764	-0.112764	1.12568	0.874498	132	0.00010751	1	5	16	5	6	2	2	4	1	5	6	16	12	17	14	9	3	7	0	0	0	1	0	0	0	0	0	0	0	0	0	0	0
16S_OTU01212	Bacteria	Chloroflexi	Anaerolineae	Caldilineales	Caldilineaceae	unclassified	12.8701	0.135554	0.0014	0.00373138	-0.131042	0.131042	0.736585	1.21651	121	9.85512e-05	4	3	8	6	2	3	16	14	13	2	4	3	3	6	7	8	3	1	1	1	1	5	2	1	1	1	2	0	0	0	0	0	0
16S_OTU01558	Bacteria	Verrucomicrobia	Verrucomicrobiae	Verrucomicrobiales	Verrucomicrobiaceae	Prosthecobacter	13.3388	0.271085	0.0014	0.00373138	0.223611	-0.223611	1.12214	0.83291	191	0.000155564	8	13	18	8	11	5	8	6	11	4	6	7	7	6	4	5	6	5	3	5	1	4	5	7	4	3	3	1	2	2	1	5	2
16S_OTU01662	Bacteria	Planctomycetes	Phycisphaerae	Tepidisphaerales	WD2101_soil_group	unclassified	11.2126	0.192081	0.0014	0.00373138	-0.0418921	0.0418921	0.853898	1.15151	128	0.000104253	4	19	2	0	1	0	2	0	0	0	0	0	2	0	1	0	0	0	12	23	6	7	20	8	1	4	1	7	4	2	2	0	0
16S_OTU01905	Bacteria	Bacteroidetes	Bacteroidia	Sphingobacteriales	AKYH767	unclassified	12.2064	0.23447	0.0014	0.00373138	-0.102386	0.102386	1.09183	0.91898	73	5.94565e-05	3	7	4	2	6	5	9	5	5	2	3	7	0	1	0	1	3	2	2	1	0	0	2	2	1	0	0	0	0	0	0	0	0
16S_OTU02022	Bacteria	Actinobacteria	Thermoleophilia	Solirubrobacterales	67-14	unclassified	15.2594	0.274756	0.0014	0.00373138	-0.343704	0.343704	0.715263	1.13889	362	0.000294839	4	9	0	10	2	4	4	1	1	0	13	8	0	5	1	16	8	11	14	9	5	10	10	20	10	19	14	19	23	12	23	16	17
16S_OTU02575	Bacteria	Chloroflexi	unclassified	unclassified	unclassified	unclassified	11.5692	0.18316	0.0014	0.00373138	0.421667	-0.421667	1.09659	0.692671	20	1.62895e-05	1	1	5	0	0	1	2	4	3	1	0	0	0	0	0	0	0	1	0	0	1	0	0	0	0	0	0	0	0	0	0	0	0
16S_OTU03326	Bacteria	Patescibacteria	Gracilibacteria	Candidatus_Peribacteria	unclassified	unclassified	7.82025	0.153036	0.0014	0.00373138	-0.351339	0.351339	0.705483	1.14005	40	3.25789e-05	2	0	0	0	1	1	0	1	1	0	0	0	0	1	1	5	10	0	0	0	0	0	1	0	0	0	0	3	2	3	2	1	3
16S_OTU03489	Bacteria	Bacteroidetes	Bacteroidia	Chitinophagales	37-13	unclassified	13.7709	0.192018	0.0014	0.00373138	0.351538	-0.351538	1.27483	0.414646	109	8.87775e-05	0	1	3	5	3	3	4	1	6	0	1	2	2	0	0	4	1	6	4	5	5	1	5	5	6	8	8	0	2	1	3	3	4
16S_OTU03713	Bacteria	Proteobacteria	Gammaproteobacteria	Xanthomonadales	Rhodanobacteraceae	unclassified	11.014	0.251804	0.0014	0.00373138	0.187282	-0.187282	1.07083	0.915349	29	2.36197e-05	0	0	0	0	0	0	0	1	0	0	3	1	4	0	0	8	1	3	0	0	0	0	0	0	0	0	0	0	0	2	0	2	2
16S_OTU04038	Bacteria	Verrucomicrobia	Verrucomicrobiae	Chthoniobacterales	Chthoniobacteraceae	unclassified	12.6988	0.23138	0.0014	0.00373138	-0.329391	0.329391	0.550766	1.2352	22	1.79184e-05	0	0	0	0	0	0	2	0	0	0	0	0	0	0	0	0	0	0	2	2	1	2	2	3	1	3	0	0	2	1	0	0	1
16S_OTU04779	Bacteria	Acidobacteria	Subgroup_6	unclassified	unclassified	unclassified	11.2676	0.105933	0.0014	0.00373138	-0.310899	0.310899	1.00762	0.915884	27	2.19908e-05	0	0	0	2	3	1	1	1	2	2	1	1	4	2	3	2	1	1	0	0	0	0	0	0	0	0	0	0	0	0	0	0	0
16S_OTU05298	Bacteria	Actinobacteria	Actinobacteria	Propionibacteriales	Nocardioidaceae	Nocardioides	11.3556	0.216735	0.0014	0.00373138	0.161547	-0.161547	0.814185	1.15787	25	2.03618e-05	1	0	0	0	3	3	1	5	1	0	0	0	1	0	0	0	0	1	1	1	0	4	2	1	0	0	0	0	0	0	0	0	0
16S_OTU06339	Bacteria	Verrucomicrobia	Verrucomicrobiae	Chthoniobacterales	Chthoniobacteraceae	Chthoniobacter	10.5419	0.203461	0.0014	0.00373138	-0.397254	0.397254	0.586162	1.17518	75	6.10855e-05	0	0	0	0	0	0	0	0	0	0	0	0	0	0	0	1	2	2	4	3	4	0	1	0	1	2	7	7	2	3	3	6	6
16S_OTU00303	Bacteria	Proteobacteria	Alphaproteobacteria	Sphingomonadales	Sphingomonadaceae	Novosphingobium	11.8957	0.0675462	0.0015	0.00392783	-0.34366	0.34366	0.464271	1.26221	2007	0.00163465	28	30	44	71	57	45	45	39	50	101	119	85	23	34	52	45	35	42	75	32	41	133	87	149	90	111	71	20	63	18	31	28	25
16S_OTU00734	Bacteria	Planctomycetes	Phycisphaerae	Tepidisphaerales	CPla-3_termite_group	unclassified	11.2909	0.13398	0.0015	0.00392783	0.164095	-0.164095	1.21493	0.725082	127	0.000103438	13	25	25	6	7	7	7	5	4	12	0	0	4	4	2	4	2	0	0	0	0	0	0	0	0	0	0	0	0	0	0	0	0
16S_OTU00871	Bacteria	Proteobacteria	Deltaproteobacteria	Myxococcales	Sandaracinaceae	unclassified	11.9813	0.0981479	0.0015	0.00392783	-0.266404	0.266404	0.919952	1.03064	125	0.000101809	13	14	22	9	10	10	3	3	3	0	0	2	10	3	10	5	0	7	0	0	0	0	0	0	1	0	0	0	0	0	0	0	0
16S_OTU01143	Bacteria	Chloroflexi	Anaerolineae	RBG-13-54-9	unclassified	unclassified	12.4554	0.177251	0.0015	0.00392783	0.433047	-0.433047	1.06227	0.730261	221	0.000179999	28	21	29	6	21	6	22	11	21	12	1	8	18	7	6	0	0	4	0	0	0	0	0	0	0	0	0	0	0	0	0	0	0
16S_OTU01240	Bacteria	Chloroflexi	Anaerolineae	RBG-13-54-9	unclassified	unclassified	9.0305	0.12031	0.0015	0.00392783	0.501084	-0.501084	0.943403	0.798188	134	0.000109139	7	7	1	12	5	9	8	25	28	2	1	1	7	5	2	4	5	4	0	0	0	0	0	0	0	0	0	0	0	1	0	0	0
16S_OTU01587	Bacteria	Planctomycetes	Planctomycetacia	Isosphaerales	Isosphaeraceae	Singulisphaera	12.5656	0.235742	0.0015	0.00392783	-0.375531	0.375531	0.721635	1.1133	251	0.000204433	11	2	5	13	11	6	13	11	13	6	7	8	5	4	5	6	9	10	9	5	13	8	8	8	7	7	9	6	2	2	7	1	5
16S_OTU02009	Bacteria	Planctomycetes	Planctomycetacia	Pirellulales	Pirellulaceae	unclassified	13.2032	0.265927	0.0015	0.00392783	0.0157288	-0.0157288	1.1426	0.867624	64	5.21263e-05	0	0	0	0	0	0	0	1	2	0	3	1	2	1	2	2	0	1	4	2	3	0	0	1	3	0	1	6	8	1	6	4	3
16S_OTU02484	Bacteria	Bacteroidetes	Bacteroidia	Chitinophagales	Chitinophagaceae	unclassified	11.2027	0.172356	0.0015	0.00392783	-0.0398795	0.0398795	0.853279	1.15212	108	8.79631e-05	1	3	4	2	5	2	6	4	7	18	7	14	2	9	4	9	8	3	0	0	0	0	0	0	0	0	0	0	0	0	0	0	0
16S_OTU02672	Bacteria	Planctomycetes	OM190	unclassified	unclassified	unclassified	13.3839	0.204952	0.0015	0.00392783	0.0376286	-0.0376286	0.920696	1.09916	95	7.73749e-05	1	5	2	3	2	0	0	2	0	1	4	0	1	1	3	1	2	3	4	3	5	0	0	0	2	2	4	2	3	4	3	6	8
16S_OTU02887	Bacteria	Bacteroidetes	Bacteroidia	Chitinophagales	Chitinophagaceae	unclassified	10.0131	0.195322	0.0015	0.00392783	0.268266	-0.268266	0.954094	0.998062	19	1.5475e-05	0	0	0	0	0	0	1	0	0	0	0	0	0	0	0	0	0	0	3	2	2	0	2	5	0	1	1	0	1	0	0	0	0
16S_OTU03074	Bacteria	Planctomycetes	Planctomycetacia	Pirellulales	Pirellulaceae	unclassified	11.0472	0.154769	0.0015	0.00392783	-0.486959	0.486959	0.812049	0.94723	159	0.000129501	7	5	10	4	7	5	10	7	5	5	8	7	4	4	3	6	4	6	5	3	3	5	10	6	3	2	3	3	5	1	1	0	1
16S_OTU03990	Bacteria	Proteobacteria	Gammaproteobacteria	Diplorickettsiales	Diplorickettsiaceae	unclassified	13.5005	0.253813	0.0015	0.00392783	-0.266427	0.266427	0.647374	1.22042	25	2.03618e-05	0	1	1	4	1	1	1	4	4	1	0	0	1	0	0	0	1	0	0	2	1	1	1	0	0	0	0	0	0	0	0	0	0
16S_OTU04036	Bacteria	Proteobacteria	Gammaproteobacteria	Coxiellales	Coxiellaceae	Coxiella	14.221	0.168086	0.0015	0.00392783	-0.239638	0.239638	0.781808	1.15152	29	2.36197e-05	4	2	4	0	1	1	2	4	3	0	0	0	0	1	0	0	0	0	1	1	0	0	0	1	0	0	0	0	1	2	0	0	0
16S_OTU04267	Bacteria	Proteobacteria	Gammaproteobacteria	unclassified	unclassified	unclassified	8.05344	0.139879	0.0015	0.00392783	0.477742	-0.477742	1.17704	0.435971	35	2.85065e-05	0	3	1	3	3	2	5	2	10	1	0	2	2	0	0	0	1	0	0	0	0	0	0	0	0	0	0	0	0	0	0	0	0
16S_OTU04743	Bacteria	Patescibacteria	Parcubacteria	Candidatus_Yanofskybacteria	unclassified	unclassified	10.0028	0.204043	0.0015	0.00392783	0.188166	-0.188166	0.945961	1.04355	23	1.87329e-05	0	0	0	0	0	0	0	0	0	0	0	0	0	0	0	0	0	0	4	3	3	1	1	2	6	0	1	0	1	0	0	1	0
16S_OTU05206	Bacteria	Proteobacteria	Gammaproteobacteria	unclassified	unclassified	unclassified	11.6128	0.228527	0.0015	0.00392783	0.49069	-0.49069	0.938559	0.817343	35	2.85065e-05	0	0	0	0	0	0	0	0	0	0	0	0	0	0	0	1	0	0	0	0	0	1	0	2	0	1	3	1	2	4	4	3	2
16S_OTU05544	Bacteria	Elusimicrobia	Lineage_IIa	unclassified	unclassified	unclassified	13.235	0.298776	0.0015	0.00392783	0.0903916	-0.0903916	1.16568	0.826257	56	4.56105e-05	1	0	0	1	1	0	1	2	3	1	2	4	1	5	2	3	4	5	1	1	0	3	0	0	0	1	0	2	1	2	0	2	3
16S_OTU07935	Bacteria	Planctomycetes	Planctomycetacia	Pirellulales	Pirellulaceae	Pir4_lineage	10.9999	0.156254	0.0015	0.00392783	0.485428	-0.485428	1.13383	0.523679	84	6.84157e-05	0	0	0	1	0	0	0	0	0	0	1	2	0	0	0	3	0	0	4	8	4	3	3	4	1	3	1	8	7	6	4	7	5
16S_OTU00454	Bacteria	Planctomycetes	Phycisphaerae	Tepidisphaerales	WD2101_soil_group	unclassified	12.1123	0.172931	0.0016	0.00414929	-0.0171443	0.0171443	0.986375	1.04176	450	0.000366513	2	0	0	2	1	0	5	3	0	0	12	6	0	0	0	2	3	3	23	42	22	7	22	32	3	2	4	33	32	35	16	32	38
16S_OTU00577	Bacteria	Acidobacteria	Subgroup_17	unclassified	unclassified	unclassified	12.0338	0.206044	0.0016	0.00414929	-0.0500248	0.0500248	0.932499	1.0881	129	0.000105067	0	0	0	0	0	0	0	0	0	0	0	0	0	0	0	0	0	0	5	7	3	3	7	6	0	0	5	2	3	15	10	16	8
16S_OTU00932	Bacteria	Proteobacteria	Gammaproteobacteria	Betaproteobacteriales	TRA3-20	unclassified	14.9466	0.216818	0.0016	0.00414929	0.430546	-0.430546	1.10124	0.673454	385	0.000313572	5	8	3	3	7	4	9	6	6	1	13	13	5	3	9	10	12	14	13	16	9	3	8	6	21	20	12	13	12	7	24	20	21
16S_OTU01567	Bacteria	Proteobacteria	Deltaproteobacteria	Myxococcales	BIrii41	unclassified	7.22209	0.158961	0.0016	0.00414929	0.126792	-0.126792	0.650989	1.2653	76	6.18999e-05	1	0	1	0	1	1	0	3	3	23	0	10	1	4	2	8	8	5	0	0	0	0	0	1	0	0	0	0	0	0	0	2	0
16S_OTU01758	Bacteria	Verrucomicrobia	Verrucomicrobiae	Pedosphaerales	Pedosphaeraceae	unclassified	12.1916	0.240729	0.0016	0.00414929	-0.363501	0.363501	0.667821	1.15457	361	0.000294025	14	9	2	12	7	4	11	12	32	8	20	11	8	13	6	22	19	19	1	1	7	2	2	1	7	3	12	15	4	4	7	18	11
16S_OTU03685	Bacteria	Planctomycetes	Planctomycetacia	Pirellulales	Pirellulaceae	unclassified	8.85818	0.19459	0.0016	0.00414929	-0.331574	0.331574	0.547021	1.23563	31	2.52487e-05	1	1	1	1	1	0	1	1	1	2	0	5	2	2	6	2	2	2	0	0	0	0	0	0	0	0	0	0	0	0	0	0	0
16S_OTU04129	Bacteria	unclassified	unclassified	unclassified	unclassified	unclassified	10.0804	0.175191	0.0016	0.00414929	-0.599278	0.599278	0.657449	0.930626	18	1.46605e-05	0	0	1	0	0	0	2	0	0	0	0	0	0	0	0	0	0	0	1	2	0	3	4	1	0	1	1	0	0	0	1	0	0
16S_OTU04229	Bacteria	Bacteroidetes	Bacteroidia	Chitinophagales	Chitinophagaceae	unclassified	13.1478	0.261933	0.0016	0.00414929	0.470927	-0.470927	1.06703	0.671296	22	1.79184e-05	3	2	1	1	0	1	2	2	2	0	0	0	0	0	0	0	0	2	0	1	0	0	1	0	1	2	0	1	0	0	0	0	0
16S_OTU06438	Bacteria	Bacteroidetes	Ignavibacteria	SJA-28	unclassified	unclassified	9.89101	0.23006	0.0016	0.00414929	-0.103129	0.103129	1.04226	0.974678	46	3.74658e-05	0	0	0	0	0	0	0	0	0	0	2	2	2	0	1	0	0	2	2	0	1	1	0	3	1	2	0	2	3	8	2	3	5
16S_OTU09326	Bacteria	Chloroflexi	KD4-96	unclassified	unclassified	unclassified	12.7881	0.170356	0.0016	0.00414929	0.0889186	-0.0889186	0.954387	1.06359	325	0.000264704	10	31	21	11	12	8	15	25	21	0	7	4	4	3	5	6	8	7	11	2	9	7	7	10	3	6	9	2	1	5	7	6	10
16S_OTU00862	Bacteria	Fibrobacteres	Fibrobacteria	Fibrobacterales	Fibrobacteraceae	possible_genus_04	13.6986	0.201919	0.0017	0.00436234	0.00198354	-0.00198354	0.936619	1.087	230	0.000187329	10	11	19	9	8	5	7	17	16	3	1	1	5	3	4	12	7	15	12	4	5	5	4	3	5	7	9	1	11	4	1	1	1
16S_OTU00901	Bacteria	Acidobacteria	Subgroup_6	unclassified	unclassified	unclassified	13.0963	0.161214	0.0017	0.00436234	0.150046	-0.150046	0.708644	1.2284	405	0.000329862	23	41	11	30	10	15	2	7	7	29	35	43	26	14	34	9	16	14	1	0	0	0	1	0	5	1	2	1	0	0	9	5	4
16S_OTU01280	Bacteria	Proteobacteria	Alphaproteobacteria	Acetobacterales	Acetobacteraceae	unclassified	12.2348	0.226059	0.0017	0.00436234	0.502444	-0.502444	1.00408	0.718368	244	0.000198731	9	8	12	15	12	10	17	17	16	4	8	4	9	7	10	4	6	13	3	6	2	2	3	9	4	4	9	1	2	0	2	3	5
16S_OTU01826	Bacteria	Proteobacteria	Alphaproteobacteria	Rhizobiales	Beijerinckiaceae	Microvirga	13.0519	0.313529	0.0017	0.00436234	0.148805	-0.148805	1.06872	0.932611	117	9.52933e-05	3	4	1	0	1	3	0	2	0	1	6	4	3	1	7	5	2	7	4	2	2	3	2	1	3	6	2	3	9	3	5	3	3
16S_OTU02060	Bacteria	Patescibacteria	Parcubacteria	Candidatus_Kaiserbacteria	unclassified	unclassified	9.99182	0.19419	0.0017	0.00436234	0.181016	-0.181016	0.734417	1.20419	47	3.82802e-05	4	10	3	3	5	2	6	4	1	1	0	1	1	2	2	1	0	0	0	0	0	0	0	0	0	0	0	0	0	0	0	1	0
16S_OTU02198	Bacteria	Patescibacteria	ABY1	Candidatus_Magasanikbacteria	unclassified	unclassified	9.58361	0.159907	0.0017	0.00436234	-0.223855	0.223855	0.668627	1.22705	63	5.13118e-05	2	0	0	7	2	2	1	15	10	0	0	0	0	0	0	0	2	1	0	0	3	0	0	0	5	5	2	1	1	1	1	1	1
16S_OTU03351	Bacteria	Proteobacteria	Alphaproteobacteria	Caulobacterales	Hyphomonadaceae	SWB02	10.1095	0.201802	0.0017	0.00436234	0.101289	-0.101289	0.906858	1.10214	120	9.77367e-05	3	1	1	5	10	2	5	9	6	1	4	5	6	5	7	5	4	6	0	0	1	0	0	0	1	0	0	3	2	10	4	5	1
16S_OTU03761	Bacteria	WPS-2	unclassified	unclassified	unclassified	unclassified	7.94607	0.146645	0.0017	0.00436234	-0.434873	0.434873	0.703321	1.07874	35	2.85065e-05	2	1	4	2	3	1	1	10	7	1	0	0	0	2	1	0	0	0	0	0	0	0	0	0	0	0	0	0	0	0	0	0	0
16S_OTU03988	Bacteria	Bacteroidetes	Bacteroidia	Sphingobacteriales	Sphingobacteriaceae	Mucilaginibacter	8.5189	0.120464	0.0017	0.00436234	-0.458309	0.458309	0.716681	1.04899	70	5.70131e-05	2	4	3	0	2	1	2	0	0	20	9	8	0	9	7	3	0	0	0	0	0	0	0	0	0	0	0	0	0	0	0	0	0
16S_OTU04501	Bacteria	Latescibacteria	unclassified	unclassified	unclassified	unclassified	11.7384	0.239538	0.0017	0.00436234	-0.262317	0.262317	0.463673	1.30312	30	2.44342e-05	0	0	0	0	0	1	1	0	0	0	2	0	1	1	0	1	1	0	0	0	0	0	0	0	1	2	0	4	1	3	1	0	2
16S_OTU04705	Bacteria	Chloroflexi	Anaerolineae	SBR1031	unclassified	unclassified	12.1989	0.138933	0.0017	0.00436234	-0.057241	0.057241	0.754294	1.21775	28	2.28052e-05	0	1	0	1	1	4	2	1	2	0	0	1	1	1	0	0	1	1	0	0	0	0	0	0	5	4	2	0	0	0	0	0	0
16S_OTU00117	Bacteria	Planctomycetes	Phycisphaerae	Tepidisphaerales	WD2101_soil_group	unclassified	10.1823	0.083411	0.0018	0.00454949	0.00962461	-0.00962461	0.90354	1.11456	1118	0.000910581	150	105	87	85	57	58	64	51	49	6	8	23	57	44	55	24	16	22	4	12	1	2	3	5	1	1	1	2	2	23	16	23	24
16S_OTU00400	Bacteria	Verrucomicrobia	Verrucomicrobiae	Pedosphaerales	Pedosphaeraceae	unclassified	11.7137	0.185377	0.0018	0.00454949	-0.0608493	0.0608493	1.08305	0.937004	515	0.000419454	26	18	24	29	14	24	24	22	27	12	27	22	24	35	44	43	21	47	3	1	7	0	0	0	0	0	0	8	5	5	0	3	0
16S_OTU00465	Bacteria	Proteobacteria	Gammaproteobacteria	Betaproteobacteriales	Burkholderiaceae	Burkholderia-Caballeronia-Paraburkholderia	12.1041	0.227922	0.0018	0.00454949	0.0843453	-0.0843453	1.23042	0.727884	324	0.000263889	11	9	11	17	19	9	11	21	24	24	13	14	15	21	13	27	15	27	0	0	1	0	0	1	0	2	0	5	5	2	0	5	0
16S_OTU00508	Bacteria	Proteobacteria	Alphaproteobacteria	unclassified	unclassified	unclassified	12.3188	0.196425	0.0018	0.00454949	-0.0429705	0.0429705	1.10793	0.909614	151	0.000122985	14	6	1	4	9	4	13	11	14	1	4	2	2	5	2	2	3	2	4	4	4	2	4	7	1	2	2	5	4	4	1	2	2
16S_OTU01422	Bacteria	Actinobacteria	Thermoleophilia	Gaiellales	unclassified	unclassified	11.8257	0.197397	0.0018	0.00454949	-0.441369	0.441369	0.47473	1.19202	576	0.000469136	33	51	58	34	38	32	33	31	35	31	22	23	18	28	22	9	21	19	2	1	9	0	1	2	4	2	1	5	2	4	1	0	0
16S_OTU01844	Bacteria	Bacteroidetes	Bacteroidia	Flavobacteriales	Weeksellaceae	Chryseobacterium	6.31354	0.0848687	0.0018	0.00454949	0.24864	-0.24864	0.750909	1.16792	76	6.18999e-05	0	0	1	0	4	1	1	0	1	6	27	16	4	2	0	2	0	5	0	1	0	2	1	0	0	0	1	0	0	1	0	0	0
16S_OTU02049	Bacteria	Patescibacteria	Parcubacteria	Candidatus_Azambacteria	unclassified	unclassified	9.04902	0.226023	0.0018	0.00454949	0.106947	-0.106947	0.947266	1.06644	99	8.06328e-05	4	1	2	0	2	3	2	3	4	0	3	5	2	2	4	4	4	1	0	1	0	0	0	0	0	0	0	2	3	7	3	18	2
16S_OTU02882	Bacteria	Planctomycetes	Planctomycetacia	Pirellulales	Pirellulaceae	unclassified	12.6771	0.169252	0.0018	0.00454949	0.386449	-0.386449	1.08673	0.749389	33	2.68776e-05	0	0	0	0	0	0	2	1	1	0	0	0	0	0	1	2	0	0	1	1	2	0	0	0	1	0	1	4	3	1	3	3	3
16S_OTU03173	Bacteria	Bacteroidetes	Bacteroidia	Cytophagales	Microscillaceae	unclassified	11.1585	0.188486	0.0018	0.00454949	-0.348237	0.348237	0.948558	0.949871	14	1.14026e-05	0	0	0	0	0	1	1	0	0	1	2	3	0	1	2	0	0	1	0	0	0	0	0	0	0	0	0	0	1	1	0	0	0
16S_OTU03693	Bacteria	Verrucomicrobia	Verrucomicrobiae	Verrucomicrobiales	Rubritaleaceae	Luteolibacter	11.5692	0.209665	0.0018	0.00454949	0.485151	-0.485151	1.05377	0.670797	49	3.99092e-05	1	0	1	1	1	1	2	2	2	2	2	3	0	1	1	6	1	4	2	0	0	1	1	1	0	0	0	2	2	2	1	3	0
16S_OTU03839	Bacteria	Patescibacteria	ABY1	Candidatus_Uhrbacteria	unclassified	unclassified	8.47798	0.130659	0.0018	0.00454949	0.340031	-0.340031	1.22262	0.564969	37	3.01355e-05	0	5	0	0	0	0	0	0	0	0	0	0	0	0	0	0	0	0	4	1	2	0	1	0	11	2	7	0	0	0	1	2	0
16S_OTU03881	Bacteria	Chloroflexi	Anaerolineae	SBR1031	unclassified	unclassified	10.1308	0.158137	0.0018	0.00454949	-0.365031	0.365031	0.638093	1.17025	35	2.85065e-05	0	0	0	0	0	0	0	0	0	0	0	0	0	0	0	0	0	0	0	0	2	0	0	0	1	1	2	1	0	1	8	5	1
16S_OTU04685	Bacteria	Planctomycetes	Planctomycetacia	Pirellulales	Pirellulaceae	unclassified	8.48888	0.182246	0.0018	0.00454949	-0.50435	0.50435	0.68009	1.02842	88	7.16736e-05	0	0	0	0	0	0	0	1	1	0	1	1	0	0	0	1	0	0	4	2	2	2	3	4	3	3	2	2	6	5	11	4	6
16S_OTU05444	Bacteria	Acidobacteria	Subgroup_6	unclassified	unclassified	unclassified	10.3638	0.192937	0.0018	0.00454949	0.628819	-0.628819	0.839511	0.718817	55	4.4796e-05	0	0	0	0	0	0	0	0	0	0	0	0	0	0	0	0	0	0	4	6	4	0	9	0	11	7	6	0	4	0	1	0	1
16S_OTU06197	Bacteria	Rokubacteria	NC10	Rokubacteriales	unclassified	unclassified	10.7534	0.179781	0.0018	0.00454949	-0.344879	0.344879	0.74878	1.11637	27	2.19908e-05	0	0	0	0	0	0	0	0	0	0	1	0	0	0	0	0	0	0	0	1	0	1	0	0	0	0	1	0	1	2	7	3	4
16S_OTU07616	Bacteria	Verrucomicrobia	Verrucomicrobiae	Verrucomicrobiales	Rubritaleaceae	Luteolibacter	11.6004	0.209315	0.0018	0.00454949	-0.137422	0.137422	0.895154	1.10342	72	5.8642e-05	1	1	2	2	2	2	1	1	1	7	9	4	2	2	7	1	5	4	1	1	1	3	1	1	0	0	0	0	1	0	0	1	4
16S_OTU00173	Bacteria	Proteobacteria	Gammaproteobacteria	Betaproteobacteriales	SC-I-84	unclassified	13.1783	0.12069	0.0019	0.00476196	-0.0822383	0.0822383	0.822427	1.16966	2003	0.00163139	35	31	40	47	24	22	34	23	30	30	96	82	64	49	65	80	52	83	64	67	88	36	28	54	98	85	91	96	97	70	48	37	52
16S_OTU01267	Bacteria	Planctomycetes	Phycisphaerae	Phycisphaerales	Phycisphaeraceae	AKYG587	8.70624	0.14202	0.0019	0.00476196	-0.13138	0.13138	0.897221	1.1033	107	8.71486e-05	0	0	0	0	0	0	0	0	0	0	0	0	0	0	0	1	1	0	2	3	4	0	4	2	1	1	3	4	2	15	3	3	6
16S_OTU01680	Bacteria	Rokubacteria	NC10	Rokubacteriales	unclassified	unclassified	13.735	0.224852	0.0019	0.00476196	0.416584	-0.416584	1.14564	0.6155	392	0.000319273	4	3	1	24	6	11	7	15	7	1	12	10	13	11	9	21	17	8	14	6	14	3	6	4	12	7	13	8	7	12	18	11	25
16S_OTU01857	Bacteria	Acidobacteria	Subgroup_6	unclassified	unclassified	unclassified	12.8986	0.115425	0.0019	0.00476196	-0.440951	0.440951	0.86999	0.9435	140	0.000114026	6	5	3	0	1	2	0	1	0	1	0	1	0	1	2	1	2	1	4	7	1	3	5	4	3	5	5	1	4	4	9	12	15
16S_OTU02101	Bacteria	Planctomycetes	Phycisphaerae	Tepidisphaerales	Tepidisphaeraceae	Tepidisphaera	11.9894	0.242549	0.0019	0.00476196	0.669393	-0.669393	1.01793	0.271572	109	8.87775e-05	3	2	8	7	5	0	3	1	4	7	3	8	8	7	9	8	2	11	0	1	0	2	2	0	0	0	0	0	2	0	1	0	1
16S_OTU02421	Bacteria	Chloroflexi	TK10	unclassified	unclassified	unclassified	10.2695	0.190937	0.0019	0.00476196	0.298187	-0.298187	1.18763	0.678283	81	6.59723e-05	4	3	4	0	1	2	3	5	1	2	2	1	2	3	2	2	2	0	5	4	2	5	3	4	3	2	2	1	3	1	1	2	2
16S_OTU03423	Bacteria	Verrucomicrobia	Verrucomicrobiae	Chthoniobacterales	Chthoniobacteraceae	Chthoniobacter	9.5562	0.147066	0.0019	0.00476196	0.424959	-0.424959	1.0065	0.81447	38	3.095e-05	0	1	0	0	1	2	1	2	0	0	4	3	0	0	2	5	3	10	0	0	0	0	0	0	0	0	0	1	0	3	0	0	0
16S_OTU03964	Bacteria	Proteobacteria	Deltaproteobacteria	Myxococcales	mle1-27	unclassified	12.8871	0.277747	0.0019	0.00476196	-0.116645	0.116645	1.15012	0.84097	16	1.30316e-05	1	2	1	1	0	2	1	1	2	0	0	0	0	0	1	0	0	0	0	0	1	0	0	0	1	1	0	0	0	0	1	0	0
16S_OTU05166	Bacteria	Chloroflexi	Chloroflexia	Thermomicrobiales	JG30-KF-CM45	unclassified	5.20682	0.148074	0.0019	0.00476196	0.0352577	-0.0352577	1.04693	0.979859	18	1.46605e-05	1	1	1	1	1	1	0	2	2	0	0	0	0	0	0	0	0	0	2	0	0	6	0	0	0	0	0	0	0	0	0	0	0
16S_OTU00076	Bacteria	Chloroflexi	Dehalococcoidia	S085	unclassified	unclassified	12.0811	0.149368	0.002	0.00495715	0.249125	-0.249125	1.19947	0.699055	1559	0.00126976	80	99	101	65	57	58	73	39	60	35	35	34	42	47	44	29	29	44	31	42	31	25	40	30	40	34	43	60	57	27	24	26	21
16S_OTU01266	Bacteria	Actinobacteria	Thermoleophilia	Gaiellales	unclassified	unclassified	11.5954	0.148584	0.002	0.00495715	0.410708	-0.410708	1.02094	0.811978	426	0.000346965	21	24	13	14	11	9	0	1	1	13	30	20	8	6	13	22	18	8	13	14	11	12	11	16	4	4	3	14	15	11	11	20	10
16S_OTU01747	Bacteria	Planctomycetes	Phycisphaerae	Tepidisphaerales	WD2101_soil_group	unclassified	10.9054	0.130316	0.002	0.00495715	0.167789	-0.167789	0.971809	1.02703	41	3.33934e-05	0	0	0	6	1	4	9	3	7	1	2	2	0	0	0	0	2	1	0	0	1	0	0	0	1	0	1	0	0	0	0	0	0
16S_OTU02211	Bacteria	Acidobacteria	Subgroup_18	unclassified	unclassified	unclassified	12.4505	0.266015	0.002	0.00495715	0.22343	-0.22343	1.06675	0.902864	129	0.000105067	1	2	0	1	0	3	3	1	5	0	3	2	2	2	2	1	8	0	3	2	7	3	0	3	4	3	1	4	3	10	11	10	6
16S_OTU02443	Bacteria	Acidobacteria	Thermoanaerobaculia	Thermoanaerobaculales	Thermoanaerobaculaceae	Subgroup_10	12.6071	0.176641	0.002	0.00495715	0.329335	-0.329335	1.07212	0.82444	103	8.38907e-05	3	2	3	2	1	5	3	12	4	7	9	10	4	6	3	11	7	10	0	0	0	1	0	0	0	0	0	0	0	0	0	0	0
16S_OTU02673	Bacteria	Proteobacteria	Gammaproteobacteria	unclassified	unclassified	unclassified	11.0972	0.135095	0.002	0.00495715	-0.376397	0.376397	0.915601	0.959417	89	7.24881e-05	8	15	13	8	3	7	1	2	7	2	1	0	2	3	1	6	3	1	0	1	0	0	1	0	0	0	0	0	0	0	1	1	2
16S_OTU03060	Bacteria	Gemmatimonadetes	S0134_terrestrial_group	unclassified	unclassified	unclassified	11.6318	0.133066	0.002	0.00495715	-0.0523204	0.0523204	1.11494	0.899964	30	2.44342e-05	1	2	0	3	1	3	3	5	6	0	1	0	0	0	0	1	3	1	0	0	0	0	0	0	0	0	0	0	0	0	0	0	0
16S_OTU03283	Bacteria	Chloroflexi	Anaerolineae	SBR1031	unclassified	unclassified	11.232	0.149232	0.002	0.00495715	-0.183755	0.183755	0.765902	1.18352	84	6.84157e-05	0	0	0	0	0	0	0	0	0	0	0	0	0	0	0	0	0	0	5	10	4	2	6	3	7	11	12	0	2	0	4	2	4
16S_OTU03521	Bacteria	Patescibacteria	Parcubacteria	unclassified	unclassified	unclassified	9.59233	0.195379	0.002	0.00495715	-0.158684	0.158684	1.03718	0.964245	35	2.85065e-05	2	2	3	0	3	6	8	2	5	0	0	2	1	1	0	0	0	0	0	0	0	0	0	0	0	0	0	0	0	0	0	0	0
16S_OTU05307	Bacteria	Planctomycetes	Pla3_lineage	unclassified	unclassified	unclassified	12.5548	0.246924	0.002	0.00495715	-0.0677517	0.0677517	1.25928	0.68067	17	1.3846e-05	0	0	0	0	1	0	0	0	2	0	2	1	1	2	1	0	0	0	0	0	0	0	0	0	0	0	0	1	0	2	0	1	0
16S_OTU06350	Bacteria	Planctomycetes	Planctomycetacia	Planctomycetales	unclassified	unclassified	11.128	0.147528	0.002	0.00495715	0.408196	-0.408196	1.22693	0.447887	2056	0.00167456	70	75	119	67	73	61	63	89	91	154	49	66	140	146	158	88	75	82	23	31	29	20	23	30	24	14	15	41	34	15	19	17	12
16S_OTU07786	Bacteria	Proteobacteria	Alphaproteobacteria	Rhizobiales	Rhizobiales_Incertae_Sedis	Bauldia	10.623	0.0826332	0.002	0.00495715	0.483749	-0.483749	1.08739	0.617133	181	0.00014742	6	8	3	19	14	7	20	22	20	7	5	3	7	1	4	10	12	8	0	0	0	0	0	0	1	0	0	1	1	1	0	0	0
16S_OTU00403	Bacteria	Proteobacteria	Alphaproteobacteria	Rhizobiales	Rhizobiales_Incertae_Sedis	Bauldia	13.1801	0.189438	0.0021	0.00514807	0.300338	-0.300338	1.26207	0.524387	324	0.000263889	11	19	19	20	16	11	27	15	17	4	6	1	7	8	7	2	5	13	7	4	6	0	3	8	10	15	7	8	7	11	5	6	6
16S_OTU01228	Bacteria	Chloroflexi	Anaerolineae	Anaerolineales	Anaerolineaceae	unclassified	12.308	0.140088	0.0021	0.00514807	0.38434	-0.38434	1.04207	0.812468	140	0.000114026	0	0	0	9	0	2	3	11	9	0	7	7	0	1	1	7	8	7	2	1	1	0	2	0	3	5	2	0	2	6	5	5	3
16S_OTU01475	Bacteria	Planctomycetes	Planctomycetacia	Pirellulales	Pirellulaceae	Pir4_lineage	10.6504	0.157012	0.0021	0.00514807	-0.0800445	0.0800445	0.820386	1.17142	262	0.000213392	0	0	0	0	0	0	2	0	2	0	3	0	0	0	0	0	3	0	13	15	4	7	15	7	9	14	6	4	14	10	21	24	36
16S_OTU01580	Bacteria	Actinobacteria	Actinobacteria	Kineosporiales	Kineosporiaceae	Angustibacter	9.89886	0.188987	0.0021	0.00514807	0.0185531	-0.0185531	1.0436	0.984374	84	6.84157e-05	4	6	5	6	13	4	11	8	5	4	1	1	2	5	1	2	1	2	0	0	0	1	0	0	0	0	0	1	1	0	0	0	0
16S_OTU01620	Bacteria	Bacteroidetes	Ignavibacteria	OPB56	unclassified	unclassified	12.5371	0.210822	0.0021	0.00514807	0.288527	-0.288527	1.15777	0.73628	46	3.74658e-05	3	0	0	4	3	3	3	3	7	0	0	0	0	2	2	0	1	2	2	1	0	1	1	2	1	0	1	0	1	1	2	0	0
16S_OTU01849	Bacteria	Planctomycetes	Pla4_lineage	unclassified	unclassified	unclassified	11.4577	0.227555	0.0021	0.00514807	0.321932	-0.321932	1.3116	0.345037	226	0.000184071	2	6	6	21	8	11	5	7	13	1	0	0	5	3	1	0	1	8	18	10	7	10	4	4	11	6	7	4	6	6	9	2	10
16S_OTU01911	Bacteria	Proteobacteria	Alphaproteobacteria	Caulobacterales	Hyphomonadaceae	Hirschia	11.7547	0.18445	0.0021	0.00514807	-0.18674	0.18674	0.996519	0.995956	732	0.000596194	8	13	7	25	17	8	38	17	45	8	33	12	23	16	36	44	21	46	24	15	16	13	15	20	10	15	8	22	25	34	10	16	19
16S_OTU02333	Bacteria	Latescibacteria	Latescibacteria	Latescibacterales	Latescibacteraceae	unclassified	10.286	0.238233	0.0021	0.00514807	0.418902	-0.418902	0.969068	0.864944	108	8.79631e-05	0	0	0	0	0	0	0	0	0	0	3	0	0	0	0	0	1	0	3	4	3	1	2	6	3	1	1	7	2	19	6	12	8
16S_OTU02896	Bacteria	Actinobacteria	Actinobacteria	Frankiales	Frankiaceae	Jatrophihabitans	12.8235	0.213119	0.0021	0.00514807	0.65412	-0.65412	0.964154	0.472385	124	0.000100995	4	6	13	14	14	8	14	15	9	13	0	2	2	1	5	2	0	2	0	0	0	0	0	0	0	0	0	0	0	0	0	0	0
16S_OTU03540	Bacteria	Planctomycetes	vadinHA49	unclassified	unclassified	unclassified	10.8174	0.105348	0.0021	0.00514807	-0.457452	0.457452	0.57192	1.13516	86	7.00447e-05	2	0	4	8	9	6	7	10	14	3	5	1	1	2	3	2	5	4	0	0	0	0	0	0	0	0	0	0	0	0	0	0	0
16S_OTU04843	Bacteria	Proteobacteria	Gammaproteobacteria	Diplorickettsiales	Diplorickettsiaceae	Aquicella	12.3062	0.245505	0.0021	0.00514807	-0.32799	0.32799	1.02368	0.884924	16	1.30316e-05	2	1	1	0	0	1	2	0	1	0	0	0	0	0	0	0	0	0	3	0	2	0	0	0	1	0	1	0	0	0	0	0	0
16S_OTU06553	Bacteria	Verrucomicrobia	Verrucomicrobiae	Pedosphaerales	Pedosphaeraceae	unclassified	12.2625	0.261716	0.0021	0.00514807	0.172977	-0.172977	0.992573	1.00512	62	5.04973e-05	2	2	0	6	1	1	3	1	4	0	2	3	0	1	1	0	0	3	5	3	3	1	2	2	3	3	3	1	1	2	0	1	1
16S_OTU00930	Bacteria	Acidobacteria	Acidobacteriia	Solibacterales	Solibacteraceae_(Subgroup_3)	unclassified	11.8937	0.102902	0.0022	0.00535418	-0.182729	0.182729	1.05333	0.937343	333	0.000271219	1	3	2	6	4	1	5	12	11	0	6	10	4	0	4	7	3	2	17	13	16	9	10	14	25	23	27	10	13	9	13	14	9
16S_OTU01006	Bacteria	Cyanobacteria	Melainabacteria	Obscuribacterales	unclassified	unclassified	7.00016	0.133653	0.0022	0.00535418	0.360079	-0.360079	0.795706	1.0729	67	5.45697e-05	1	0	0	3	4	2	0	0	0	0	2	0	2	0	2	3	4	15	1	1	1	1	0	2	0	1	1	1	1	4	3	3	4
16S_OTU01425	Bacteria	Verrucomicrobia	Verrucomicrobiae	Pedosphaerales	Pedosphaeraceae	unclassified	10.1631	0.11281	0.0022	0.00535418	-0.180693	0.180693	0.87771	1.10422	264	0.000215021	11	10	9	8	2	3	6	4	8	7	4	3	1	4	8	0	1	2	10	5	10	5	5	11	19	27	16	10	9	6	2	7	6
16S_OTU01444	Bacteria	Patescibacteria	Parcubacteria	unclassified	unclassified	unclassified	9.81092	0.0762756	0.0022	0.00535418	-0.70673	0.70673	0.441901	0.897692	115	9.36644e-05	1	2	1	2	2	1	11	21	23	0	2	1	1	1	0	2	4	1	0	0	2	3	0	2	6	6	2	4	4	1	0	2	7
16S_OTU02157	Bacteria	Planctomycetes	Planctomycetacia	Pirellulales	Pirellulaceae	unclassified	6.1459	0.122835	0.0022	0.00535418	0.164479	-0.164479	1.25634	0.650487	45	3.66513e-05	2	0	7	0	4	1	16	5	4	2	0	0	1	1	0	1	0	0	0	0	0	1	0	0	0	0	0	0	0	0	0	0	0
16S_OTU04220	Bacteria	Bacteroidetes	Ignavibacteria	OPB56	unclassified	unclassified	10.6216	0.165545	0.0022	0.00535418	-0.312967	0.312967	0.737707	1.14332	29	2.36197e-05	0	0	0	0	0	2	1	0	0	0	0	0	0	0	0	0	0	0	0	1	1	4	5	2	3	2	2	0	2	0	1	0	3
16S_OTU06127	Bacteria	Proteobacteria	Deltaproteobacteria	Myxococcales	Nannocystaceae	Nannocystis	13.2902	0.241275	0.0022	0.00535418	0.173232	-0.173232	1.16483	0.799026	49	3.99092e-05	4	4	4	2	3	3	2	3	5	0	1	0	0	2	1	0	0	2	2	0	2	1	1	0	1	0	0	1	0	2	0	1	1
16S_OTU06472	Bacteria	Planctomycetes	Phycisphaerae	Tepidisphaerales	WD2101_soil_group	unclassified	10.704	0.112523	0.0022	0.00535418	-0.322158	0.322158	0.728206	1.14401	111	9.04065e-05	22	20	10	10	7	12	0	1	1	1	0	3	7	0	5	1	3	5	0	0	0	0	0	0	1	1	0	0	1	0	0	0	0
16S_OTU00075	Bacteria	Acidobacteria	Subgroup_17	unclassified	unclassified	unclassified	11.6807	0.211211	0.0023	0.00555731	-0.0248204	0.0248204	1.02197	1.00653	845	0.00068823	13	16	4	9	5	3	5	8	2	20	17	24	1	11	8	31	20	27	36	22	54	14	24	32	32	31	31	33	18	56	39	29	16
16S_OTU00809	Bacteria	Chloroflexi	Anaerolineae	SBR1031	unclassified	unclassified	12.0129	0.171859	0.0023	0.00555731	-0.356137	0.356137	0.805939	1.06803	160	0.000130316	1	0	0	7	4	5	10	9	13	0	12	15	6	15	6	18	16	14	0	0	3	0	0	0	0	0	1	1	1	3	0	0	0
16S_OTU01585	Bacteria	Proteobacteria	Alphaproteobacteria	Rhizobiales	Labraceae	Labrys	12.0514	0.245696	0.0023	0.00555731	-0.38143	0.38143	0.623652	1.16696	63	5.13118e-05	0	0	1	2	2	1	6	3	2	7	2	3	3	3	4	7	2	7	0	0	1	0	0	0	0	0	0	0	1	1	0	0	1
16S_OTU01707	Bacteria	Planctomycetes	Phycisphaerae	mle1-8	unclassified	unclassified	11.7595	0.267158	0.0023	0.00555731	0.4882	-0.4882	1.1222	0.542932	120	9.77367e-05	0	0	0	5	1	1	0	3	3	2	4	3	5	1	1	5	3	8	2	7	3	2	1	4	3	3	4	7	3	3	7	4	10
16S_OTU02034	Bacteria	Chloroflexi	JG30-KF-CM66	unclassified	unclassified	unclassified	11.5948	0.241022	0.0023	0.00555731	-0.0982781	0.0982781	0.759621	1.20886	41	3.33934e-05	0	0	0	0	0	0	0	0	0	0	0	1	0	0	0	0	1	0	1	1	3	0	1	2	2	0	0	0	3	4	6	4	1
16S_OTU02533	Bacteria	Planctomycetes	OM190	unclassified	unclassified	unclassified	12.6556	0.177404	0.0023	0.00555731	-0.438303	0.438303	0.611895	1.1303	44	3.58368e-05	0	0	0	0	1	0	0	0	0	0	0	0	1	0	0	1	0	0	0	1	1	0	1	0	4	2	0	1	0	2	1	7	6
16S_OTU04912	Bacteria	Acidobacteria	Subgroup_6	unclassified	unclassified	unclassified	10.368	0.231584	0.0023	0.00555731	0.351541	-0.351541	1.04971	0.833803	78	6.35289e-05	0	0	0	0	0	0	0	0	1	0	2	0	0	0	0	0	0	1	3	1	4	0	1	3	3	4	3	1	5	10	4	7	9
16S_OTU06578	Bacteria	Planctomycetes	Planctomycetacia	Planctomycetales	unclassified	unclassified	11.0333	0.215393	0.0023	0.00555731	-0.153442	0.153442	0.644773	1.26223	129	0.000105067	3	5	9	6	4	7	7	2	7	14	7	10	7	10	10	10	4	4	0	0	0	0	0	0	0	0	0	3	0	0	0	0	0
16S_OTU01055	Bacteria	Actinobacteria	Actinobacteria	Propionibacteriales	Nocardioidaceae	Nocardioides	12.0281	0.190667	0.0024	0.00574218	-0.460944	0.460944	0.554687	1.14071	468	0.000381173	11	7	8	13	18	16	36	28	12	1	8	8	5	3	8	8	2	8	22	10	6	23	14	29	11	26	15	4	12	2	13	17	19
16S_OTU01795	Bacteria	Actinobacteria	Actinobacteria	Propionibacteriales	Nocardioidaceae	Marmoricola	12.3492	0.200694	0.0024	0.00574218	-0.429261	0.429261	0.955793	0.86895	118	9.61078e-05	2	1	3	11	9	9	13	9	7	3	1	1	0	2	1	1	0	4	1	3	1	7	0	3	0	7	2	0	7	0	2	4	1
16S_OTU01933	Bacteria	Planctomycetes	Planctomycetacia	Gemmatales	Gemmataceae	unclassified	11.1206	0.137728	0.0024	0.00574218	-0.638067	0.638067	0.522225	0.961222	58	4.72394e-05	0	0	0	1	0	2	0	2	0	0	1	1	1	1	0	1	1	1	3	2	0	2	2	3	0	0	2	1	1	0	2	6	6
16S_OTU01980	Bacteria	Acidobacteria	Subgroup_22	unclassified	unclassified	unclassified	11.9349	0.276294	0.0024	0.00574218	0.415124	-0.415124	0.947303	0.892475	92	7.49315e-05	0	0	0	3	0	0	0	0	0	0	9	4	1	8	0	5	6	2	1	0	3	0	1	1	6	1	5	4	7	7	2	8	1
16S_OTU02209	Bacteria	Planctomycetes	OM190	unclassified	unclassified	unclassified	11.0487	0.13688	0.0024	0.00574218	-0.43531	0.43531	0.618071	1.12939	28	2.28052e-05	0	0	0	0	0	0	0	0	0	0	0	0	0	0	0	0	0	2	0	0	0	0	0	0	1	2	4	0	1	1	2	2	4
16S_OTU02316	Bacteria	Planctomycetes	Phycisphaerae	Phycisphaerales	Phycisphaeraceae	AKYG587	10.0278	0.0929594	0.0024	0.00574218	-0.0408096	0.0408096	0.480244	1.3508	57	4.6425e-05	0	0	0	0	0	0	0	0	0	0	3	0	0	0	0	2	0	1	2	0	11	0	0	0	12	9	13	1	0	0	0	1	0
16S_OTU03059	Bacteria	Actinobacteria	Thermoleophilia	unclassified	unclassified	unclassified	12.0551	0.241218	0.0024	0.00574218	-0.299624	0.299624	0.950444	0.982532	106	8.63341e-05	1	0	0	0	0	0	0	0	0	0	0	0	0	0	0	1	2	3	5	2	3	5	0	3	4	9	3	8	5	4	11	7	6
16S_OTU04046	Bacteria	unclassified	unclassified	unclassified	unclassified	unclassified	10.7804	0.226305	0.0024	0.00574218	0.260507	-0.260507	1.03858	0.914578	38	3.095e-05	4	4	2	0	4	4	2	5	6	0	2	1	0	1	1	2	0	0	0	0	0	0	0	0	0	0	0	0	0	0	0	0	0
16S_OTU04384	Bacteria	Verrucomicrobia	Verrucomicrobiae	Pedosphaerales	unclassified	unclassified	10.9799	0.15764	0.0024	0.00574218	-0.151516	0.151516	0.934316	1.06642	314	0.000255744	0	0	0	0	0	0	0	0	0	4	9	13	3	2	0	1	4	9	24	23	17	9	6	18	8	8	8	19	35	19	17	6	21
16S_OTU04497	Bacteria	Proteobacteria	Deltaproteobacteria	Myxococcales	Nannocystaceae	Nannocystis	12.2616	0.170638	0.0024	0.00574218	0.193691	-0.193691	1.1137	0.859674	22	1.79184e-05	0	0	0	3	3	1	2	2	2	0	0	0	0	0	0	0	0	0	2	0	0	1	1	0	1	0	0	0	0	1	2	0	1
16S_OTU05228	Bacteria	Planctomycetes	Pla4_lineage	unclassified	unclassified	unclassified	10.8741	0.231631	0.0024	0.00574218	-0.224509	0.224509	0.77499	1.16253	23	1.87329e-05	0	0	0	0	0	0	0	0	0	0	0	0	0	0	0	0	3	1	1	0	0	0	0	0	2	0	1	3	1	2	3	0	2
16S_OTU00013	Bacteria	Acidobacteria	Blastocatellia_(Subgroup_4)	Blastocatellales	Blastocatellaceae	unclassified	9.95377	0.0873275	0.0025	0.00590786	-0.559454	0.559454	0.433265	1.09923	2978	0.0024255	35	17	40	99	82	63	60	49	74	37	53	47	33	30	34	70	44	64	156	146	83	206	172	212	74	79	101	74	150	72	80	104	124
16S_OTU00326	Bacteria	Bacteroidetes	Bacteroidia	Chitinophagales	Chitinophagaceae	Dinghuibacter	12.2068	0.103115	0.0025	0.00590786	0.0401194	-0.0401194	1.17965	0.814768	415	0.000338006	11	8	15	2	6	13	2	1	0	17	21	20	18	8	14	4	0	4	19	9	22	3	7	4	21	22	17	13	21	15	16	11	17
16S_OTU00451	Bacteria	Verrucomicrobia	Verrucomicrobiae	Chthoniobacterales	Chthoniobacteraceae	Chthoniobacter	9.33381	0.127632	0.0025	0.00590786	-0.0581678	0.0581678	1.04825	0.97613	324	0.000263889	28	19	27	17	13	9	10	12	8	35	27	17	16	14	24	14	10	18	0	0	0	0	0	0	0	0	0	1	2	3	0	0	0
16S_OTU00564	Bacteria	Patescibacteria	ABY1	Candidatus_Magasanikbacteria	unclassified	unclassified	9.37481	0.098459	0.0025	0.00590786	-0.224248	0.224248	0.408495	1.33621	436	0.00035511	8	13	6	18	9	7	17	7	11	2	6	6	5	6	4	15	10	18	36	10	21	2	3	8	26	33	56	0	1	2	8	9	15
16S_OTU01344	Bacteria	Chloroflexi	Anaerolineae	SBR1031	A4b	unclassified	9.5459	0.202917	0.0025	0.00590786	0.169457	-0.169457	1.27083	0.618874	90	7.33026e-05	0	2	0	2	0	2	10	9	6	1	5	0	0	1	0	0	0	0	5	2	6	4	3	3	17	2	2	0	2	1	0	0	0
16S_OTU01347	Bacteria	Proteobacteria	Gammaproteobacteria	CCD24	unclassified	unclassified	10.8775	0.20717	0.0025	0.00590786	-0.252495	0.252495	0.950145	1.01047	183	0.000149049	22	22	6	14	13	15	9	15	14	0	1	6	10	4	7	6	11	5	0	0	0	0	0	0	1	1	0	0	0	0	1	0	0
16S_OTU01923	Bacteria	Planctomycetes	Phycisphaerae	Tepidisphaerales	WD2101_soil_group	unclassified	7.70987	0.162936	0.0025	0.00590786	-0.0428234	0.0428234	1.01645	1.01083	144	0.000117284	6	19	7	0	0	0	0	1	0	1	0	0	0	2	4	0	0	0	4	42	10	2	13	22	5	0	1	0	1	2	0	0	0
16S_OTU01991	Bacteria	Bacteroidetes	Bacteroidia	Sphingobacteriales	Sphingobacteriaceae	Mucilaginibacter	11.9761	0.218568	0.0025	0.00590786	-0.369461	0.369461	0.566562	1.20365	72	5.8642e-05	3	4	4	5	5	5	6	4	6	2	1	0	1	0	4	0	1	3	2	0	1	4	2	1	0	1	0	0	6	1	0	0	0
16S_OTU02485	Bacteria	Bacteroidetes	Bacteroidia	Sphingobacteriales	env.OPS_17	unclassified	11.1216	0.218262	0.0025	0.00590786	-0.409432	0.409432	0.745146	1.07172	63	5.13118e-05	2	5	1	2	1	2	1	0	4	0	0	1	1	2	2	1	0	1	4	4	1	5	2	7	3	2	0	1	2	0	0	1	1
16S_OTU03002	Bacteria	Verrucomicrobia	Verrucomicrobiae	Verrucomicrobiales	Rubritaleaceae	Luteolibacter	6.9956	0.122383	0.0025	0.00590786	0.136738	-0.136738	1.14071	0.847355	43	3.50223e-05	0	1	1	1	0	4	2	1	2	0	1	2	0	2	0	0	0	3	3	4	11	1	2	2	0	0	0	0	0	0	0	0	0
16S_OTU04075	Bacteria	Proteobacteria	Gammaproteobacteria	Betaproteobacteriales	Burkholderiaceae	unclassified	11.0019	0.196848	0.0025	0.00590786	-0.509697	0.509697	0.552091	1.09721	129	0.000105067	1	2	4	4	3	5	2	2	7	4	11	11	4	4	9	10	4	11	4	4	1	3	3	1	0	0	1	2	2	1	1	1	3
16S_OTU04849	Bacteria	Planctomycetes	Phycisphaerae	Phycisphaerales	Phycisphaeraceae	unclassified	9.45966	0.180247	0.0025	0.00590786	-0.17712	0.17712	1.02902	0.966181	33	2.68776e-05	0	0	0	0	0	0	0	0	0	0	0	0	0	0	0	0	0	0	1	2	1	0	0	0	0	2	0	0	2	4	5	3	0
16S_OTU06521	Bacteria	unclassified	unclassified	unclassified	unclassified	unclassified	10.5511	0.202677	0.0025	0.00590786	0.242688	-0.242688	1.17233	0.748159	12	9.77367e-06	0	0	0	0	0	0	0	0	0	0	0	0	0	0	0	0	0	0	1	2	1	0	1	1	1	1	2	0	0	0	0	1	0
16S_OTU08101	Bacteria	Bacteroidetes	Bacteroidia	Sphingobacteriales	Sphingobacteriaceae	unclassified	9.6113	0.139295	0.0025	0.00590786	-0.266736	0.266736	1.13373	0.789187	19	1.5475e-05	4	0	1	1	1	1	1	0	0	0	1	0	0	0	0	1	0	0	0	0	0	2	3	2	0	0	0	0	0	0	0	0	0
16S_OTU02586	Bacteria	Nitrospirae	Nitrospira	Nitrospirales	Nitrospiraceae	Nitrospira	10.7533	0.232945	0.0026	0.00612265	0.0179788	-0.0179788	0.64484	1.28153	52	4.23526e-05	2	0	0	0	0	0	0	0	2	0	0	1	0	0	0	0	3	2	0	1	2	0	0	0	0	0	0	1	0	9	9	3	1
16S_OTU03083	Bacteria	Firmicutes	Clostridia	Clostridiales	Ruminococcaceae	Ruminococcaceae_UCG-012	8.80194	0.161988	0.0026	0.00612265	0.0878554	-0.0878554	1.09868	0.913986	44	3.58368e-05	1	1	2	2	7	2	10	5	2	0	0	0	1	0	1	0	0	0	0	0	2	0	1	0	0	1	1	2	0	0	1	0	1
16S_OTU04412	Bacteria	Patescibacteria	Parcubacteria	Candidatus_Kaiserbacteria	unclassified	unclassified	7.93774	0.176468	0.0026	0.00612265	-0.127046	0.127046	0.629038	1.27631	30	2.44342e-05	1	3	1	8	3	0	2	6	3	1	0	1	0	0	0	1	0	0	0	0	0	0	0	0	0	0	0	0	0	0	0	0	0
16S_OTU05875	Bacteria	Patescibacteria	Parcubacteria	unclassified	unclassified	unclassified	6.93035	0.170238	0.0026	0.00612265	-0.0033155	0.0033155	1.10017	0.921098	31	2.52487e-05	0	0	1	0	0	2	0	0	0	3	2	4	3	0	4	1	9	2	0	0	0	0	0	0	0	0	0	0	0	0	0	0	0
16S_OTU00857	Bacteria	Proteobacteria	Alphaproteobacteria	unclassified	unclassified	unclassified	9.73346	0.138936	0.0027	0.00630294	0.0945575	-0.0945575	1.03814	0.980891	98	7.98183e-05	0	0	1	0	0	0	0	0	0	0	0	0	0	0	0	1	0	6	7	4	5	0	4	2	1	0	3	2	0	4	14	8	0
16S_OTU01093	Bacteria	Acidobacteria	Subgroup_6	unclassified	unclassified	unclassified	11.7905	0.199993	0.0027	0.00630294	0.0315455	-0.0315455	1.13452	0.877258	269	0.000219093	9	6	0	24	2	14	4	4	4	1	15	18	9	6	9	12	16	16	3	4	9	3	3	4	5	0	1	10	17	13	3	6	3
16S_OTU01253	Bacteria	Actinobacteria	Acidimicrobiia	Actinomarinales	unclassified	unclassified	10.4668	0.207739	0.0027	0.00630294	-0.213437	0.213437	0.926972	1.05027	197	0.000160451	0	0	0	0	0	0	0	0	0	0	0	0	0	0	0	0	3	1	11	14	2	4	4	7	1	1	3	2	3	29	18	25	27
16S_OTU01362	Bacteria	Proteobacteria	Alphaproteobacteria	unclassified	unclassified	unclassified	11.8005	0.227647	0.0027	0.00630294	-0.560859	0.560859	0.473488	1.08097	99	8.06328e-05	1	0	0	2	1	0	5	6	2	0	2	3	1	1	0	7	1	4	2	1	1	1	1	1	2	1	3	7	9	0	6	4	6
16S_OTU02066	Bacteria	Planctomycetes	Pla3_lineage	unclassified	unclassified	unclassified	11.6439	0.203232	0.0027	0.00630294	0.0335524	-0.0335524	1.10452	0.91459	60	4.88684e-05	0	0	0	0	0	0	1	0	0	0	0	0	0	0	0	0	0	0	2	5	0	0	2	3	2	0	1	0	7	4	9	7	5
16S_OTU02147	Bacteria	Patescibacteria	Parcubacteria	unclassified	unclassified	unclassified	7.20075	0.0901341	0.0027	0.00630294	-0.0789266	0.0789266	0.646357	1.27587	45	3.66513e-05	10	13	4	2	1	1	4	0	2	1	1	0	2	2	0	0	1	0	0	0	0	0	0	0	0	0	0	1	0	0	0	0	0
16S_OTU03525	Bacteria	Actinobacteria	Acidimicrobiia	unclassified	unclassified	unclassified	10.5143	0.211481	0.0027	0.00630294	-0.115531	0.115531	1.02497	0.989944	317	0.000258188	5	6	10	13	9	6	12	9	10	0	8	1	4	6	10	4	8	8	14	14	12	13	11	6	15	27	17	6	12	6	4	1	18
16S_OTU04189	Bacteria	Patescibacteria	Parcubacteria	Candidatus_Adlerbacteria	unclassified	unclassified	6.73643	0.0978259	0.0027	0.00630294	-0.084291	0.084291	0.536007	1.32532	34	2.76921e-05	3	1	0	2	2	1	10	4	4	0	0	0	1	2	1	0	1	2	0	0	0	0	0	0	0	0	0	0	0	0	0	0	0
16S_OTU04634	Bacteria	Patescibacteria	Parcubacteria	Candidatus_Moranbacteria	unclassified	unclassified	9.91954	0.129953	0.0027	0.00630294	0.417423	-0.417423	1.07968	0.723973	20	1.62895e-05	0	0	0	0	0	0	0	0	0	0	0	0	0	0	0	0	0	0	0	0	2	1	0	0	0	1	1	0	0	1	3	4	2
16S_OTU08125	Bacteria	Proteobacteria	Gammaproteobacteria	Betaproteobacteriales	Nitrosomonadaceae	unclassified	11.162	0.256255	0.0027	0.00630294	-0.0793844	0.0793844	1.08097	0.936477	34	2.76921e-05	0	0	0	2	0	0	0	0	1	0	3	0	0	0	0	1	3	0	0	0	2	0	0	0	1	1	1	1	2	4	2	2	2
16S_OTU00346	Bacteria	Verrucomicrobia	Verrucomicrobiae	Chthoniobacterales	Chthoniobacteraceae	Chthoniobacter	10.3806	0.221274	0.0028	0.00644685	0.108108	-0.108108	1.32622	0.524615	256	0.000208505	33	36	7	33	9	13	14	13	13	6	10	18	5	2	1	9	7	5	2	0	6	3	0	0	4	2	4	0	0	0	1	0	0
16S_OTU00587	Bacteria	Acidobacteria	Subgroup_6	unclassified	unclassified	unclassified	11.6094	0.117904	0.0028	0.00644685	-0.309359	0.309359	0.827679	1.08218	726	0.000591307	5	9	8	10	3	11	7	9	6	1	10	2	14	0	12	40	29	33	18	21	18	11	20	14	58	47	28	40	57	21	33	32	31
16S_OTU01121	Bacteria	Proteobacteria	Deltaproteobacteria	Myxococcales	Haliangiaceae	Haliangium	9.48566	0.215242	0.0028	0.00644685	0.136353	-0.136353	1.29901	0.576219	162	0.000131945	7	7	12	5	4	5	4	3	8	24	3	9	10	10	15	10	14	12	0	0	0	0	0	0	0	0	0	0	0	0	0	0	0
16S_OTU01250	Bacteria	Planctomycetes	Phycisphaerae	Tepidisphaerales	WD2101_soil_group	unclassified	11.3501	0.122092	0.0028	0.00644685	0.26393	-0.26393	1.11625	0.815658	249	0.000202804	4	2	0	9	10	7	6	4	4	2	3	14	14	6	9	21	11	18	6	6	4	7	4	8	2	4	10	14	18	8	2	1	4
16S_OTU01406	Bacteria	Actinobacteria	Actinobacteria	Propionibacteriales	Nocardioidaceae	Nocardioides	11.1122	0.202741	0.0028	0.00644685	-0.177163	0.177163	0.862581	1.11728	261	0.000212577	6	3	5	15	14	10	15	9	11	4	5	1	1	4	1	6	2	5	20	5	8	13	7	13	6	8	4	6	15	3	8	7	9
16S_OTU01842	Bacteria	Proteobacteria	Gammaproteobacteria	Gammaproteobacteria_Incertae_Sedis	Gammaproteobacteria_Incertae_Sedis_Unknown_Family	unclassified	10.5433	0.206259	0.0028	0.00644685	0.26489	-0.26489	1.20576	0.675557	47	3.82802e-05	0	0	0	0	0	0	0	0	1	0	0	0	1	0	0	1	1	0	2	3	0	0	4	0	0	0	0	2	2	2	7	8	1
16S_OTU01856	Bacteria	Acidobacteria	Subgroup_6	unclassified	unclassified	unclassified	11.4983	0.228855	0.0028	0.00644685	0.378517	-0.378517	1.26419	0.396529	356	0.000289952	8	6	3	4	7	6	6	3	9	1	4	3	0	1	5	5	6	4	24	22	7	14	21	29	19	17	19	9	7	9	14	15	7
16S_OTU02018	Bacteria	Chloroflexi	Chloroflexia	Thermomicrobiales	JG30-KF-CM45	unclassified	11.1721	0.183235	0.0028	0.00644685	0.636417	-0.636417	1.03871	0.349569	23	1.87329e-05	2	1	0	2	4	2	2	3	3	0	0	3	0	0	1	0	0	0	0	0	0	0	0	0	0	0	0	0	0	0	0	0	0
16S_OTU02236	Bacteria	Zixibacteria	unclassified	unclassified	unclassified	unclassified	10.7721	0.128977	0.0028	0.00644685	-0.248912	0.248912	0.599873	1.25211	53	4.31671e-05	0	0	0	0	0	0	0	0	0	0	2	0	0	0	0	0	0	0	6	0	3	0	2	0	0	0	0	0	0	0	11	6	1
16S_OTU02321	Bacteria	Actinobacteria	Acidimicrobiia	IMCC26256	unclassified	unclassified	11.262	0.246648	0.0028	0.00644685	0.503879	-0.503879	1.13391	0.485202	103	8.38907e-05	0	1	0	2	0	1	0	1	0	0	5	6	0	0	1	3	4	4	4	3	0	2	5	3	5	3	3	6	2	6	7	4	11
16S_OTU02630	Bacteria	Chloroflexi	OLB14	unclassified	unclassified	unclassified	10.5149	0.231938	0.0028	0.00644685	-0.387264	0.387264	0.724719	1.10273	64	5.21263e-05	5	5	11	2	7	2	7	6	2	5	1	1	1	2	1	1	1	1	0	0	0	2	0	0	1	0	0	0	0	0	0	0	0
16S_OTU02769	Bacteria	Proteobacteria	Deltaproteobacteria	Myxococcales	Sandaracinaceae	unclassified	11.7182	0.226413	0.0028	0.00644685	0.0144826	-0.0144826	1.06923	0.956623	17	1.3846e-05	0	0	0	0	0	0	0	0	1	2	1	2	0	2	0	2	1	3	0	0	1	0	0	0	0	0	0	2	0	0	0	0	0
16S_OTU03128	Bacteria	Armatimonadetes	Fimbriimonadia	Fimbriimonadales	Fimbriimonadaceae	unclassified	8.84315	0.153192	0.0028	0.00644685	0.352769	-0.352769	1.24767	0.488476	24	1.95473e-05	0	0	0	0	0	0	0	0	0	0	0	0	0	0	0	0	0	0	1	1	0	0	0	0	2	0	2	1	1	2	3	1	1
16S_OTU03406	Bacteria	Planctomycetes	Planctomycetacia	Gemmatales	Gemmataceae	unclassified	9.2317	0.205861	0.0028	0.00644685	-0.353816	0.353816	1.0179	0.870406	64	5.21263e-05	1	1	0	0	1	1	0	0	0	0	2	1	4	0	0	2	1	1	0	0	2	0	0	0	1	0	0	0	0	5	13	8	1
16S_OTU04074	Bacteria	Proteobacteria	Alphaproteobacteria	Rhizobiales	Devosiaceae	Devosia	11.2884	0.225114	0.0028	0.00644685	-0.480173	0.480173	0.555238	1.12351	260	0.000211763	0	4	7	7	6	5	9	9	9	6	2	2	6	4	1	4	1	8	18	6	14	9	9	14	13	14	13	7	16	6	2	6	7
16S_OTU05274	Bacteria	Cyanobacteria	Melainabacteria	Obscuribacterales	unclassified	unclassified	10.9181	0.124645	0.0028	0.00644685	-0.450392	0.450392	0.677317	1.08189	18	1.46605e-05	0	0	0	1	0	0	3	0	0	0	0	0	0	1	1	0	0	0	0	0	0	0	0	0	0	0	0	2	3	3	2	1	0
16S_OTU00049	Bacteria	Verrucomicrobia	Verrucomicrobiae	Chthoniobacterales	Chthoniobacteraceae	Candidatus_Udaeobacter	12.2262	0.0865544	0.0029	0.00663731	0.376072	-0.376072	1.1114	0.723963	1419	0.00115574	24	49	28	2	0	4	1	4	6	31	86	79	0	12	3	6	9	6	112	117	89	69	79	129	79	35	55	25	44	33	47	42	46
16S_OTU00589	Bacteria	Chloroflexi	Anaerolineae	RBG-13-54-9	unclassified	unclassified	10.6583	0.123163	0.0029	0.00663731	-0.230118	0.230118	0.927998	1.04188	170	0.00013846	2	0	0	3	0	1	4	3	5	0	3	2	0	0	0	0	1	2	4	2	9	1	4	5	5	10	7	4	5	11	17	6	5
16S_OTU01044	Bacteria	Acidobacteria	Subgroup_5	unclassified	unclassified	unclassified	11.3568	0.243904	0.0029	0.00663731	0.173948	-0.173948	1.22329	0.705911	336	0.000273663	6	12	5	12	5	4	7	3	15	7	13	7	9	2	6	12	7	17	5	5	10	2	8	4	18	9	5	14	14	18	13	9	23
16S_OTU01755	Bacteria	Actinobacteria	Actinobacteria	Pseudonocardiales	Pseudonocardiaceae	Crossiella	7.78489	0.142474	0.0029	0.00663731	-0.0746416	0.0746416	0.805129	1.18271	39	3.17644e-05	0	1	5	2	5	1	4	4	12	3	0	0	0	0	0	1	1	0	0	0	0	0	0	0	0	0	0	0	0	0	0	0	0
16S_OTU02194	Bacteria	Actinobacteria	Thermoleophilia	Solirubrobacterales	67-14	unclassified	10.4411	0.166442	0.0029	0.00663731	-0.129068	0.129068	1.07641	0.929991	82	6.67868e-05	0	0	0	0	0	0	1	1	0	0	0	0	0	0	0	4	0	1	6	4	3	0	1	0	3	1	5	1	2	5	5	12	8
16S_OTU03580	Bacteria	Gemmatimonadetes	Gemmatimonadetes	Gemmatimonadales	Gemmatimonadaceae	Gemmatimonas	9.43165	0.173565	0.0029	0.00663731	0.527058	-0.527058	1.04552	0.614375	23	1.87329e-05	3	6	2	1	3	0	2	1	2	0	0	2	0	0	0	0	0	1	0	0	0	0	0	0	0	0	0	0	0	0	0	0	0
16S_OTU06890	Bacteria	Proteobacteria	Alphaproteobacteria	Rhizobiales	unclassified	unclassified	11.9294	0.256195	0.0029	0.00663731	-0.484839	0.484839	0.893221	0.873605	27	2.19908e-05	1	0	0	0	0	1	1	1	0	1	2	1	2	2	1	3	3	0	0	0	0	1	0	1	0	0	0	0	0	0	0	2	2
16S_OTU00213	Bacteria	Nitrospirae	Nitrospira	Nitrospirales	Nitrospiraceae	Nitrospira	9.07969	0.0914223	0.003	0.00682552	0.0258652	-0.0258652	0.673198	1.26657	1048	0.000853568	21	15	8	16	25	21	14	24	23	15	15	24	0	9	10	13	8	19	73	83	62	48	40	42	32	25	47	17	8	26	49	47	44
16S_OTU00651	Bacteria	Armatimonadetes	Fimbriimonadia	Fimbriimonadales	Fimbriimonadaceae	unclassified	9.95248	0.110402	0.003	0.00682552	-0.322568	0.322568	1.00005	0.915635	178	0.000144976	0	0	0	0	0	0	0	0	0	0	0	0	0	0	0	0	3	0	8	11	2	1	4	4	12	15	13	3	10	8	15	14	9
16S_OTU00761	Bacteria	Bacteroidetes	Bacteroidia	Flavobacteriales	Flavobacteriaceae	Flavobacterium	9.19297	0.187805	0.003	0.00682552	0.00306916	-0.00306916	1.17457	0.824136	134	0.000109139	4	0	1	3	0	4	6	2	4	1	0	4	2	0	3	0	0	0	6	4	9	3	3	12	17	7	9	3	10	4	1	4	2
16S_OTU01927	Bacteria	Proteobacteria	Deltaproteobacteria	Desulfarculales	Desulfarculaceae	unclassified	10.019	0.162877	0.003	0.00682552	0.128827	-0.128827	0.994474	1.0172	123	0.00010018	4	4	2	6	3	3	2	2	3	0	5	7	7	0	6	2	1	1	1	2	1	1	3	3	4	2	0	4	0	1	8	7	5
16S_OTU03052	Bacteria	Patescibacteria	Parcubacteria	unclassified	unclassified	unclassified	10.6708	0.204522	0.003	0.00682552	-0.270188	0.270188	0.580476	1.25191	27	2.19908e-05	0	0	0	0	0	0	0	0	2	0	0	0	0	1	0	4	0	6	0	0	1	0	0	0	0	0	0	0	0	2	2	3	0
16S_OTU05033	Bacteria	Proteobacteria	Deltaproteobacteria	Myxococcales	Blfdi19	unclassified	11.0333	0.16533	0.003	0.00682552	-0.482909	0.482909	0.606053	1.09439	24	1.95473e-05	3	2	2	2	2	0	2	3	2	0	0	1	0	0	0	1	0	0	1	0	0	0	0	0	0	0	0	0	1	1	0	0	0
16S_OTU06180	Bacteria	Proteobacteria	Gammaproteobacteria	Diplorickettsiales	Diplorickettsiaceae	unclassified	7.96423	0.144148	0.003	0.00682552	-0.0499823	0.0499823	0.878107	1.13246	31	2.52487e-05	1	0	1	1	2	1	6	1	9	0	0	1	0	0	1	1	0	0	0	0	3	0	0	1	1	0	0	0	0	0	0	0	0
16S_OTU00214	Bacteria	Rokubacteria	NC10	Rokubacteriales	unclassified	unclassified	10.7707	0.252625	0.0031	0.00701152	0.363028	-0.363028	1.19228	0.598511	1207	0.000983069	19	20	12	26	13	14	10	21	32	22	54	52	31	35	47	23	57	37	34	44	51	30	41	29	46	35	36	34	19	61	41	40	27
16S_OTU00561	Bacteria	Planctomycetes	Planctomycetacia	Planctomycetales	unclassified	unclassified	10.4106	0.0446266	0.0031	0.00701152	0.14711	-0.14711	0.984571	1.02157	965	0.000785966	21	28	46	15	9	14	24	29	44	5	16	16	15	24	20	44	25	62	35	21	33	63	65	80	19	18	12	28	27	25	15	10	15
16S_OTU00652	Bacteria	Gemmatimonadetes	Gemmatimonadetes	Gemmatimonadales	Gemmatimonadaceae	unclassified	11.0934	0.159339	0.0031	0.00701152	-0.496525	0.496525	0.631942	1.06649	159	0.000129501	1	0	0	0	0	0	0	0	0	2	1	0	0	0	0	0	0	0	16	6	6	1	6	5	0	3	0	0	1	12	23	22	5
16S_OTU02553	Bacteria	unclassified	unclassified	unclassified	unclassified	unclassified	10.3283	0.0595791	0.0031	0.00701152	-0.336279	0.336279	0.614415	1.20077	283	0.000230496	8	14	28	2	1	3	1	7	2	30	26	41	11	10	14	3	6	4	0	2	2	3	6	4	4	9	17	2	5	0	3	6	3
16S_OTU03448	Bacteria	Proteobacteria	Deltaproteobacteria	Myxococcales	Haliangiaceae	Haliangium	9.94097	0.193245	0.0031	0.00701152	0.540705	-0.540705	1.09092	0.499607	57	4.6425e-05	1	1	2	0	2	1	3	3	2	1	0	0	6	4	2	1	2	5	0	0	1	0	0	0	1	0	1	0	2	2	2	4	0
16S_OTU03514	Bacteria	unclassified	unclassified	unclassified	unclassified	unclassified	9.30221	0.107354	0.0031	0.00701152	-0.0842143	0.0842143	1.01528	1.00648	18	1.46605e-05	1	0	0	0	0	0	0	0	0	0	1	0	0	0	1	1	1	1	0	1	1	0	0	1	0	0	1	3	2	2	0	1	0
16S_OTU03592	Bacteria	Acidobacteria	Subgroup_17	unclassified	unclassified	unclassified	9.58583	0.165703	0.0031	0.00701152	-0.451441	0.451441	0.584825	1.13368	79	6.43434e-05	0	0	0	2	0	0	2	0	1	0	0	0	0	0	0	1	2	0	0	2	1	0	1	4	2	3	4	1	1	6	9	8	5
16S_OTU00517	Bacteria	Proteobacteria	Gammaproteobacteria	Xanthomonadales	Xanthomonadaceae	Arenimonas	11.3824	0.176302	0.0032	0.00717733	0.41132	-0.41132	1.09216	0.712555	1084	0.000882889	65	84	74	45	55	47	50	70	74	38	35	53	27	44	52	16	30	28	21	2	15	21	22	15	4	5	3	10	7	8	9	17	9
16S_OTU00574	Bacteria	Proteobacteria	Deltaproteobacteria	NB1-j	unclassified	unclassified	10.4739	0.163089	0.0032	0.00717733	-0.335187	0.335187	0.62171	1.19766	245	0.000199546	0	0	0	0	0	0	0	0	0	0	1	0	0	1	0	1	1	1	15	15	8	13	10	14	6	1	5	5	5	19	29	20	22
16S_OTU01092	Bacteria	Proteobacteria	Deltaproteobacteria	Myxococcales	Haliangiaceae	Haliangium	9.61618	0.178501	0.0032	0.00717733	-0.138717	0.138717	0.572054	1.30032	239	0.000194659	4	5	1	5	1	4	0	2	0	1	1	2	0	0	1	5	1	1	14	27	8	7	7	14	23	14	25	9	10	5	14	5	7
16S_OTU01214	Bacteria	Proteobacteria	Alphaproteobacteria	Rhizobiales	Hyphomicrobiaceae	Hyphomicrobium	11.5265	0.253581	0.0032	0.00717733	-0.459214	0.459214	0.752576	1.02269	253	0.000206062	12	7	10	6	11	5	9	7	9	11	12	14	6	9	9	12	11	16	2	4	4	3	5	5	5	5	1	0	6	9	2	4	8
16S_OTU01761	Bacteria	Patescibacteria	Saccharimonadia	Saccharimonadales	unclassified	unclassified	8.9868	0.0899036	0.0032	0.00717733	-0.146594	0.146594	0.8268	1.15313	52	4.23526e-05	1	3	5	0	1	0	11	6	7	1	1	1	0	2	0	1	0	1	0	0	1	2	0	0	0	1	1	0	0	0	3	1	0
16S_OTU02012	Bacteria	Patescibacteria	Parcubacteria	Candidatus_Kaiserbacteria	unclassified	unclassified	10.6768	0.124412	0.0032	0.00717733	-0.164905	0.164905	0.973346	1.02656	50	4.07236e-05	5	4	3	6	5	4	4	1	3	2	0	2	4	2	2	0	0	1	0	0	0	0	0	0	0	0	0	0	0	0	0	1	0
16S_OTU02295	Bacteria	Proteobacteria	Deltaproteobacteria	Myxococcales	Haliangiaceae	Haliangium	9.89278	0.130448	0.0032	0.00717733	-0.435687	0.435687	0.89885	0.921365	146	0.000118913	6	7	6	3	3	5	0	1	3	8	3	7	18	8	14	6	11	3	1	4	4	3	1	1	2	4	1	1	3	3	1	0	2
16S_OTU03486	Bacteria	Bacteroidetes	Bacteroidia	Sphingobacteriales	unclassified	unclassified	10.0321	0.193664	0.0032	0.00717733	0.274409	-0.274409	1.18065	0.710932	32	2.60631e-05	0	0	1	1	0	0	1	0	3	0	3	4	2	1	0	1	1	6	0	0	0	0	0	0	0	0	0	2	2	4	0	0	0
16S_OTU05953	Bacteria	Proteobacteria	Gammaproteobacteria	Betaproteobacteriales	SC-I-84	unclassified	10.7154	0.140576	0.0032	0.00717733	-0.369048	0.369048	0.761139	1.09136	335	0.000272848	0	0	0	0	0	0	0	0	0	0	0	0	0	0	0	0	0	0	42	39	10	22	36	47	5	13	20	1	6	2	22	10	16
16S_OTU07952	Bacteria	Chloroflexi	Anaerolineae	Caldilineales	Caldilineaceae	unclassified	10.0615	0.153747	0.0032	0.00717733	0.0328893	-0.0328893	0.953009	1.07159	14	1.14026e-05	0	0	0	0	0	0	0	0	0	0	1	0	0	0	0	0	0	0	2	0	1	0	0	0	0	0	0	1	0	0	2	3	1
16S_OTU00227	Bacteria	Proteobacteria	Alphaproteobacteria	Elsterales	unclassified	unclassified	9.5189	0.142501	0.0033	0.0073162	-0.235698	0.235698	0.87092	1.08751	886	0.000721623	47	63	43	18	34	18	37	22	34	31	16	21	9	14	13	13	7	19	23	36	24	23	14	27	24	27	26	30	25	18	30	27	27
16S_OTU00328	Bacteria	Planctomycetes	Phycisphaerae	Tepidisphaerales	WD2101_soil_group	unclassified	11.1783	0.124591	0.0033	0.0073162	0.531404	-0.531404	1.15025	0.371145	765	0.000623072	28	20	20	24	20	21	16	10	9	1	21	24	9	13	18	29	22	19	48	58	18	40	56	54	9	27	13	32	26	13	6	10	13
16S_OTU00388	Bacteria	Actinobacteria	Actinobacteria	Micrococcales	Microbacteriaceae	unclassified	11.3499	0.213776	0.0033	0.0073162	0.0118132	-0.0118132	1.09435	0.92786	1200	0.000977367	63	52	33	59	63	39	83	62	75	49	26	35	21	31	19	27	17	34	57	7	37	26	30	17	7	39	26	23	61	20	4	7	15
16S_OTU00630	Bacteria	Acidobacteria	Acidobacteriia	Solibacterales	Solibacteraceae_(Subgroup_3)	Bryobacter	9.92638	0.207675	0.0033	0.0073162	-0.54825	0.54825	0.53948	1.06361	368	0.000299726	37	26	52	28	47	13	21	27	27	34	0	2	20	4	16	7	0	4	0	0	0	2	0	0	1	0	0	0	0	0	0	0	0
16S_OTU00909	Bacteria	Acidobacteria	Acidobacteriia	Solibacterales	Solibacteraceae_(Subgroup_3)	unclassified	9.33365	0.148096	0.0033	0.0073162	-0.368489	0.368489	0.629649	1.17253	91	7.4117e-05	0	0	0	0	0	0	0	0	0	0	0	0	0	0	0	0	0	0	0	0	0	0	2	3	1	10	2	0	3	4	14	15	1
16S_OTU01026	Bacteria	Planctomycetes	Planctomycetacia	Pirellulales	Pirellulaceae	unclassified	9.43158	0.126966	0.0033	0.0073162	-0.271423	0.271423	0.680093	1.20012	199	0.00016208	2	0	0	0	1	0	2	2	0	0	1	0	0	0	0	1	1	0	13	7	11	4	10	6	9	7	10	3	13	8	15	17	20
16S_OTU01302	Bacteria	Planctomycetes	Phycisphaerae	Tepidisphaerales	CPla-3_termite_group	unclassified	10.3451	0.167903	0.0033	0.0073162	-0.247562	0.247562	1.08072	0.872395	81	6.59723e-05	7	5	9	9	10	7	7	1	5	8	1	2	3	3	1	3	0	0	0	0	0	0	0	0	0	0	0	0	0	0	0	0	0
16S_OTU02988	Bacteria	Gemmatimonadetes	Gemmatimonadetes	Gemmatimonadales	Gemmatimonadaceae	Gemmatimonas	10.215	0.240513	0.0033	0.0073162	0.633438	-0.633438	1.00641	0.443032	24	1.95473e-05	0	0	2	4	1	0	0	0	1	0	0	0	0	0	0	0	0	0	4	4	0	1	0	4	0	1	1	0	0	0	0	0	1
16S_OTU03111	Bacteria	unclassified	unclassified	unclassified	unclassified	unclassified	9.97996	0.163142	0.0033	0.0073162	0.155962	-0.155962	0.985113	1.01827	48	3.90947e-05	1	0	0	0	0	0	0	1	0	0	1	0	0	3	2	0	0	0	5	4	9	0	2	8	3	3	3	0	1	1	0	0	0
16S_OTU03468	Bacteria	Verrucomicrobia	Verrucomicrobiae	Pedosphaerales	Pedosphaeraceae	unclassified	11.298	0.215955	0.0033	0.0073162	-0.538354	0.538354	0.789067	0.90689	64	5.21263e-05	1	1	0	1	1	1	0	0	0	0	1	2	6	3	5	0	1	1	4	1	2	1	0	2	1	1	2	4	6	0	5	2	2
16S_OTU03635	Bacteria	Patescibacteria	Saccharimonadia	Saccharimonadales	unclassified	unclassified	9.18362	0.128709	0.0033	0.0073162	0.342006	-0.342006	1.24335	0.514978	37	3.01355e-05	0	1	4	1	1	0	0	1	0	2	0	0	0	0	0	0	0	0	1	1	0	4	3	8	1	2	1	0	4	0	0	0	0
16S_OTU05753	Bacteria	Proteobacteria	Deltaproteobacteria	Myxococcales	bacteriap25	unclassified	9.49122	0.212259	0.0033	0.0073162	-0.381534	0.381534	0.827046	1.03274	31	2.52487e-05	0	0	1	0	0	0	0	0	0	0	0	0	3	0	1	0	0	0	0	0	1	0	1	2	0	0	1	1	3	1	2	5	0
16S_OTU06967	Bacteria	unclassified	unclassified	unclassified	unclassified	unclassified	8.52154	0.173181	0.0033	0.0073162	-0.53091	0.53091	0.694231	0.989937	27	2.19908e-05	4	3	0	7	0	5	1	1	3	0	0	1	0	0	0	0	0	0	0	0	1	0	0	0	0	0	0	1	0	0	0	0	0
16S_OTU08450	Bacteria	Patescibacteria	Saccharimonadia	Saccharimonadales	unclassified	unclassified	7.91072	0.188703	0.0033	0.0073162	0.0259611	-0.0259611	0.933811	1.08876	63	5.13118e-05	0	6	19	7	5	2	2	5	2	0	3	1	0	0	0	0	0	0	2	0	0	1	5	0	0	0	0	0	1	1	0	0	0
16S_OTU00894	Bacteria	Actinobacteria	Actinobacteria	Micromonosporales	Micromonosporaceae	Rhizocola	8.45483	0.0720988	0.0034	0.00743976	-0.402476	0.402476	0.696423	1.10941	175	0.000142533	1	1	2	3	2	2	5	3	6	0	1	2	0	0	2	3	2	2	5	7	6	4	6	2	18	24	14	7	7	1	6	4	7
16S_OTU01480	Bacteria	Bacteroidetes	Bacteroidia	Chitinophagales	Chitinophagaceae	unclassified	8.81287	0.130437	0.0034	0.00743976	0.378067	-0.378067	0.885934	0.985525	243	0.000197917	21	27	43	18	10	15	9	13	6	17	2	7	13	5	11	9	2	9	0	0	0	2	1	0	2	1	0	0	0	0	0	0	0
16S_OTU01592	Bacteria	Acidobacteria	Acidobacteriia	Solibacterales	Solibacteraceae_(Subgroup_3)	Bryobacter	10.8336	0.164876	0.0034	0.00743976	-0.0958207	0.0958207	0.448123	1.35594	56	4.56105e-05	0	0	0	2	1	3	1	1	1	0	0	0	1	2	2	2	5	6	1	2	0	1	1	0	0	2	0	5	7	1	3	0	0
16S_OTU01880	Bacteria	Planctomycetes	Planctomycetacia	Gemmatales	Gemmataceae	unclassified	10.8268	0.247297	0.0034	0.00743976	0.541588	-0.541588	1.10788	0.458567	169	0.000137646	1	0	0	2	0	1	0	0	0	2	17	17	0	1	0	4	18	2	5	0	16	0	0	0	0	0	1	3	2	13	13	12	2
16S_OTU01891	Bacteria	Planctomycetes	Pla3_lineage	unclassified	unclassified	unclassified	9.7981	0.209245	0.0034	0.00743976	0.285196	-0.285196	1.10545	0.815209	39	3.17644e-05	0	0	0	0	0	0	0	0	0	0	0	0	0	0	0	0	0	0	3	4	6	0	3	5	5	1	4	0	2	2	1	0	1
16S_OTU02216	Bacteria	Patescibacteria	ABY1	Candidatus_Magasanikbacteria	unclassified	unclassified	9.19184	0.108576	0.0034	0.00743976	-0.34453	0.34453	0.568665	1.21823	60	4.88684e-05	0	0	0	5	11	2	14	6	11	1	0	5	1	3	1	0	0	0	0	0	0	0	0	0	0	0	0	0	0	0	0	0	0
16S_OTU02478	Bacteria	Chloroflexi	Chloroflexia	Chloroflexales	Roseiflexaceae	unclassified	9.50325	0.134544	0.0034	0.00743976	-0.0260299	0.0260299	0.843969	1.15979	27	2.19908e-05	0	0	0	0	0	0	0	2	0	0	0	0	0	0	0	0	0	0	0	0	1	2	1	1	0	0	0	1	0	2	2	4	5
16S_OTU03586	Bacteria	Patescibacteria	Parcubacteria	Candidatus_Azambacteria	unclassified	unclassified	8.31788	0.151598	0.0034	0.00743976	-0.12787	0.12787	1.15728	0.827582	27	2.19908e-05	0	0	0	0	0	2	0	0	1	0	0	0	0	0	0	0	0	0	0	0	0	0	0	0	2	0	0	2	2	0	4	3	1
16S_OTU03652	Bacteria	Planctomycetes	Planctomycetacia	Gemmatales	Gemmataceae	unclassified	8.763	0.176979	0.0034	0.00743976	-0.449409	0.449409	0.582284	1.13669	21	1.71039e-05	0	0	1	0	0	1	0	0	0	1	2	3	1	1	1	0	0	0	0	0	0	0	0	0	0	0	1	1	5	0	2	0	1
16S_OTU04096	Bacteria	Bacteroidetes	Bacteroidia	Flavobacteriales	Flavobacteriaceae	Flavobacterium	10.0544	0.174266	0.0034	0.00743976	-0.148504	0.148504	0.847258	1.13766	24	1.95473e-05	0	0	0	0	0	0	0	0	2	5	1	3	1	0	1	0	0	3	0	0	0	1	1	0	0	0	0	1	0	0	0	0	0
16S_OTU04137	Bacteria	Acidobacteria	Blastocatellia_(Subgroup_4)	Pyrinomonadales	Pyrinomonadaceae	RB41	11.068	0.224839	0.0034	0.00743976	0.401805	-0.401805	1.251	0.389796	65	5.29407e-05	1	0	0	2	2	1	1	5	2	1	4	2	3	2	0	0	6	5	0	2	0	0	0	0	1	2	0	1	0	3	4	1	1
16S_OTU04539	Bacteria	Acidobacteria	Acidobacteriia	Acidobacteriales	unclassified	unclassified	9.06977	0.198764	0.0034	0.00743976	-0.159945	0.159945	1.05225	0.947325	49	3.99092e-05	3	2	3	6	4	0	7	2	3	1	2	2	1	0	0	1	1	2	0	0	0	0	0	1	3	2	1	0	1	0	1	0	0
16S_OTU05837	Bacteria	Verrucomicrobia	Verrucomicrobiae	Pedosphaerales	Pedosphaeraceae	unclassified	9.88409	0.13612	0.0034	0.00743976	-0.250822	0.250822	0.565199	1.26734	22	1.79184e-05	1	2	3	4	4	2	0	1	1	1	0	0	0	0	3	0	0	0	0	0	0	0	0	0	0	0	0	0	0	0	0	0	0
16S_OTU05876	Bacteria	Actinobacteria	Actinobacteria	Micromonosporales	Micromonosporaceae	unclassified	10.1876	0.177292	0.0034	0.00743976	-0.32587	0.32587	0.873644	1.03474	58	4.72394e-05	2	0	1	1	0	0	1	0	1	0	0	0	4	2	1	1	3	3	0	1	1	1	3	1	3	3	1	3	4	5	1	2	5
16S_OTU06108	Bacteria	Bacteroidetes	Ignavibacteria	OPB56	unclassified	unclassified	9.95565	0.193174	0.0034	0.00743976	-0.219365	0.219365	1.13222	0.821587	18	1.46605e-05	3	2	1	2	0	1	3	1	2	1	0	0	1	1	0	0	0	0	0	0	0	0	0	0	0	0	0	0	0	0	0	0	0
16S_OTU08152	Bacteria	Proteobacteria	Deltaproteobacteria	Myxococcales	Blfdi19	unclassified	11.0763	0.235271	0.0034	0.00743976	0.0199683	-0.0199683	1.15629	0.849095	55	4.4796e-05	0	2	0	1	0	0	3	2	1	0	2	2	0	1	0	3	1	3	0	2	1	0	1	0	3	0	1	2	6	2	3	3	3
16S_OTU00036	Bacteria	Proteobacteria	Deltaproteobacteria	Myxococcales	Haliangiaceae	Haliangium	10.0024	0.0874367	0.0035	0.00761521	0.0317384	-0.0317384	0.94964	1.07465	3311	0.00269672	123	138	177	82	65	57	65	61	90	168	113	120	96	72	94	98	82	118	102	88	124	44	38	43	108	115	72	163	116	126	70	82	67
16S_OTU00557	Bacteria	Bacteroidetes	Bacteroidia	Cytophagales	Microscillaceae	unclassified	10.4908	0.159836	0.0035	0.00761521	0.268689	-0.268689	1.20535	0.673112	176	0.000143347	1	1	7	3	16	8	8	5	6	7	5	8	6	6	8	12	8	16	0	0	0	0	0	0	3	6	6	8	2	5	1	2	2
16S_OTU00883	Bacteria	Verrucomicrobia	Verrucomicrobiae	Chthoniobacterales	Chthoniobacteraceae	Chthoniobacter	9.10381	0.127812	0.0035	0.00761521	-0.258034	0.258034	0.701811	1.19385	259	0.000210948	19	30	34	18	12	7	7	12	18	11	9	6	12	7	18	6	5	10	0	2	4	5	3	0	0	0	0	3	0	0	0	1	0
16S_OTU03692	Bacteria	Patescibacteria	ABY1	Candidatus_Magasanikbacteria	unclassified	unclassified	10.176	0.161743	0.0035	0.00761521	0.237325	-0.237325	0.914006	1.05078	21	1.71039e-05	0	0	0	0	1	0	0	0	2	0	1	2	1	0	0	3	3	2	0	0	1	0	0	0	0	0	1	1	0	0	1	1	0
16S_OTU04889	Bacteria	Armatimonadetes	Fimbriimonadia	Fimbriimonadales	Fimbriimonadaceae	unclassified	10.1237	0.206432	0.0035	0.00761521	0.0652971	-0.0652971	1.11433	0.898918	61	4.96828e-05	6	3	6	8	3	5	4	2	5	0	1	1	5	2	1	3	3	0	1	0	0	1	1	0	0	0	0	0	0	0	0	0	0
16S_OTU08005	Bacteria	Actinobacteria	Actinobacteria	Glycomycetales	Glycomycetaceae	Glycomyces	9.01664	0.162004	0.0035	0.00761521	-0.380074	0.380074	0.914968	0.956947	19	1.5475e-05	0	0	0	0	0	1	0	2	4	0	0	0	0	0	0	0	1	1	2	0	0	1	0	0	4	1	2	0	0	0	0	0	0
16S_OTU08626	Bacteria	Patescibacteria	Parcubacteria	Candidatus_Yanofskybacteria	unclassified	unclassified	10.804	0.246494	0.0035	0.00761521	-0.371584	0.371584	0.399972	1.26746	16	1.30316e-05	0	0	0	0	0	1	0	0	0	0	1	2	0	0	1	2	0	3	0	0	0	0	0	0	0	0	0	1	0	0	2	2	0
16S_OTU00452	Bacteria	Acidobacteria	Subgroup_6	unclassified	unclassified	unclassified	11.137	0.0931585	0.0036	0.00781382	0.113671	-0.113671	1.00046	1.01515	310	0.000252487	19	32	40	19	8	10	16	7	10	20	17	16	4	6	7	11	14	11	2	3	0	13	13	8	0	1	0	2	0	0	0	0	0
16S_OTU01194	Bacteria	Verrucomicrobia	Verrucomicrobiae	Chthoniobacterales	Chthoniobacteraceae	Candidatus_Udaeobacter	9.02935	0.128001	0.0036	0.00781382	-0.144227	0.144227	0.828834	1.15231	201	0.000163709	7	27	4	23	22	32	10	5	8	4	2	6	6	7	1	10	10	5	1	1	5	1	0	2	0	0	0	1	0	0	0	0	1
16S_OTU05603	Bacteria	Actinobacteria	Actinobacteria	Propionibacteriales	Nocardioidaceae	Nocardioides	10.5852	0.186838	0.0036	0.00781382	0.411787	-0.411787	1.24891	0.374111	27	2.19908e-05	0	0	0	2	1	2	2	2	0	0	0	0	0	0	0	1	0	0	1	0	0	3	2	2	0	2	2	0	1	0	1	0	1
16S_OTU00483	Bacteria	Verrucomicrobia	Verrucomicrobiae	Pedosphaerales	Pedosphaeraceae	unclassified	6.84062	0.126348	0.0037	0.00799859	0.182722	-0.182722	0.805718	1.15713	208	0.00016941	2	0	0	0	0	0	0	0	0	0	3	1	0	0	1	0	0	0	11	1	14	1	0	1	2	1	3	1	0	7	28	36	4
16S_OTU00839	Bacteria	Patescibacteria	Gracilibacteria	unclassified	unclassified	unclassified	7.44101	0.0709638	0.0037	0.00799859	0.505587	-0.505587	0.806805	0.930903	99	8.06328e-05	1	0	1	1	12	5	0	2	3	0	0	0	24	25	10	8	1	3	0	0	0	0	0	0	0	0	0	1	0	0	0	0	0
16S_OTU03424	Bacteria	Planctomycetes	Phycisphaerae	Tepidisphaerales	WD2101_soil_group	unclassified	8.58757	0.215061	0.0037	0.00799859	-0.216663	0.216663	0.272407	1.37303	24	1.95473e-05	0	1	1	2	3	0	1	2	3	0	0	1	1	0	1	0	1	0	1	0	0	3	0	1	0	1	1	0	0	0	0	0	0
16S_OTU05393	Bacteria	Proteobacteria	Alphaproteobacteria	Sphingomonadales	Sphingomonadaceae	unclassified	7.82134	0.138397	0.0037	0.00799859	-0.0470924	0.0470924	1.14217	0.865783	27	2.19908e-05	0	0	0	8	7	0	2	0	1	0	0	0	0	0	0	0	0	0	0	1	0	0	2	2	0	1	1	0	0	0	0	1	0
16S_OTU05492	Bacteria	Patescibacteria	Saccharimonadia	Saccharimonadales	unclassified	unclassified	9.89988	0.156506	0.0037	0.00799859	-0.00666931	0.00666931	1.00576	1.02332	80	6.51578e-05	3	8	15	10	7	4	4	1	0	6	2	3	2	1	1	0	1	0	2	0	4	0	1	1	0	1	0	0	1	1	0	0	0
16S_OTU00121	Bacteria	Proteobacteria	Alphaproteobacteria	Reyranellales	Reyranellaceae	Reyranella	11.0264	0.147511	0.0038	0.00814926	-0.349152	0.349152	0.273458	1.31373	1713	0.00139519	52	69	112	52	47	44	38	37	53	58	60	79	87	59	87	67	54	51	29	46	29	32	13	27	50	37	46	56	57	32	27	33	25
16S_OTU00784	Bacteria	Planctomycetes	OM190	unclassified	unclassified	unclassified	10.2098	0.0836021	0.0038	0.00814926	-0.207315	0.207315	0.766899	1.17459	115	9.36644e-05	0	1	1	4	2	3	2	1	3	2	3	4	2	4	2	9	7	12	4	6	8	1	2	2	0	2	4	6	4	7	1	4	0
16S_OTU01039	Bacteria	Planctomycetes	OM190	unclassified	unclassified	unclassified	9.37455	0.145053	0.0038	0.00814926	-0.126794	0.126794	0.714606	1.23049	141	0.000114841	0	0	0	0	0	1	0	2	0	0	4	0	0	1	0	2	3	2	0	3	10	0	6	4	2	1	13	1	3	2	12	8	20
16S_OTU01632	Bacteria	Acidobacteria	Subgroup_6	unclassified	unclassified	unclassified	7.55003	0.169939	0.0038	0.00814926	0.439489	-0.439489	1.05945	0.726195	138	0.000112397	0	0	0	0	0	0	1	0	2	2	1	1	0	0	0	2	0	2	4	3	4	1	2	1	5	6	7	5	9	4	11	28	5
16S_OTU02528	Bacteria	Acidobacteria	Thermoanaerobaculia	Thermoanaerobaculales	Thermoanaerobaculaceae	Subgroup_10	10.5012	0.127123	0.0038	0.00814926	0.468807	-0.468807	0.902926	0.882118	90	7.33026e-05	2	0	2	5	4	3	5	3	5	2	4	1	2	1	1	5	2	0	5	1	3	1	0	1	6	7	7	0	3	0	2	2	1
16S_OTU02595	Bacteria	Verrucomicrobia	Verrucomicrobiae	Pedosphaerales	Pedosphaeraceae	unclassified	9.2806	0.165767	0.0038	0.00814926	-0.453858	0.453858	0.69507	1.06747	78	6.35289e-05	9	12	3	7	7	5	6	2	5	5	2	5	3	1	3	0	2	1	0	0	0	0	0	0	0	0	0	0	0	0	0	0	0
16S_OTU02864	Bacteria	Actinobacteria	Acidimicrobiia	IMCC26256	unclassified	unclassified	9.02376	0.15664	0.0038	0.00814926	0.486615	-0.486615	1.033	0.700211	42	3.42079e-05	1	1	3	2	2	1	0	1	1	4	1	3	5	4	2	2	2	2	0	0	0	1	1	0	1	0	0	0	1	0	0	0	0
16S_OTU02913	Bacteria	Acidobacteria	Subgroup_20	unclassified	unclassified	unclassified	9.59219	0.180787	0.0038	0.00814926	-0.110814	0.110814	0.914777	1.09362	80	6.51578e-05	2	2	1	3	0	3	2	1	3	1	3	4	1	2	0	1	1	2	4	1	3	0	0	2	0	0	0	1	2	5	6	6	1
16S_OTU03732	Bacteria	Acidobacteria	Holophagae	Subgroup_7	unclassified	unclassified	10.0709	0.184254	0.0038	0.00814926	0.294447	-0.294447	1.12351	0.78291	396	0.000322531	0	0	1	0	1	0	2	5	7	0	9	1	0	0	0	5	2	4	22	11	12	3	10	11	20	30	20	12	17	35	22	36	30
16S_OTU05821	Bacteria	Proteobacteria	Gammaproteobacteria	Betaproteobacteriales	unclassified	unclassified	9.59084	0.17287	0.0038	0.00814926	0.435989	-0.435989	1.15346	0.570811	14	1.14026e-05	0	0	0	0	1	0	0	0	0	3	2	1	0	1	2	1	0	0	0	0	0	0	0	0	0	1	0	0	1	0	0	0	0
16S_OTU01096	Bacteria	Proteobacteria	Deltaproteobacteria	Myxococcales	Haliangiaceae	Haliangium	10.1891	0.18575	0.0039	0.00832389	-0.191227	0.191227	0.436221	1.33832	255	0.000207691	20	16	17	9	4	13	10	9	10	3	3	3	9	3	1	1	2	7	9	6	18	6	6	4	5	5	5	11	4	8	5	8	5
16S_OTU01276	Bacteria	Proteobacteria	Gammaproteobacteria	Betaproteobacteriales	Nitrosomonadaceae	MND1	6.03505	0.12539	0.0039	0.00832389	0.547107	-0.547107	1.02773	0.607234	239	0.000194659	8	14	1	3	3	4	3	10	6	8	18	7	6	5	9	21	24	16	0	0	4	0	0	0	5	3	3	43	9	4	0	0	0
16S_OTU01610	Bacteria	Proteobacteria	Alphaproteobacteria	Reyranellales	Reyranellaceae	unclassified	10.8013	0.215254	0.0039	0.00832389	-0.210877	0.210877	1.20836	0.7103	248	0.000201989	6	10	1	6	11	3	9	5	13	2	11	11	9	8	16	15	9	9	4	1	1	2	3	2	9	8	9	4	7	8	10	3	5
16S_OTU03695	Bacteria	Acidobacteria	Subgroup_6	unclassified	unclassified	unclassified	8.5212	0.0961806	0.0039	0.00832389	-0.478536	0.478536	0.566722	1.11925	64	5.21263e-05	0	0	0	0	0	0	0	0	0	0	0	0	0	0	0	0	0	0	6	4	0	0	5	2	0	1	1	2	0	2	6	5	1
16S_OTU05095	Bacteria	Planctomycetes	Planctomycetacia	Pirellulales	Pirellulaceae	unclassified	9.62583	0.239905	0.0039	0.00832389	-0.420331	0.420331	0.546244	1.17741	48	3.90947e-05	0	1	0	5	2	1	2	3	1	0	3	4	3	5	1	3	3	3	0	0	0	0	0	0	0	0	0	2	1	0	0	1	1
16S_OTU09271	Bacteria	Acidobacteria	Subgroup_6	unclassified	unclassified	unclassified	10.2031	0.175591	0.0039	0.00832389	-0.354167	0.354167	0.513416	1.23677	73	5.94565e-05	0	0	0	1	0	0	0	5	6	1	0	0	2	0	0	1	3	2	1	2	1	2	3	0	2	1	0	5	0	5	8	6	5
16S_OTU00538	Bacteria	Chloroflexi	Anaerolineae	SBR1031	A4b	unclassified	9.15921	0.0657006	0.004	0.00846343	0.231485	-0.231485	0.857141	1.1003	224	0.000182442	0	0	0	0	0	0	0	2	0	0	1	0	0	0	0	0	1	4	14	20	11	4	5	14	5	10	10	3	10	4	24	22	26
16S_OTU00635	Bacteria	Proteobacteria	Gammaproteobacteria	Betaproteobacteriales	TRA3-20	unclassified	10.5482	0.0975079	0.004	0.00846343	-0.0199586	0.0199586	0.685128	1.26039	313	0.00025493	12	19	16	12	7	6	15	7	15	3	2	6	0	0	1	0	0	0	8	3	11	3	3	3	27	15	21	8	16	9	14	13	6
16S_OTU01899	Bacteria	Planctomycetes	Planctomycetacia	Gemmatales	Gemmataceae	unclassified	8.11472	0.185334	0.004	0.00846343	-0.27488	0.27488	1.00432	0.943484	61	4.96828e-05	0	0	0	0	1	1	0	1	0	0	0	1	0	0	2	2	3	4	3	1	0	1	4	1	0	2	2	4	4	4	2	1	3
16S_OTU02674	Bacteria	Chloroflexi	unclassified	unclassified	unclassified	unclassified	9.07512	0.153674	0.004	0.00846343	0.302523	-0.302523	1.04516	0.879014	36	2.9321e-05	1	1	0	0	1	0	0	3	4	0	0	0	3	2	1	0	0	0	6	1	3	1	1	2	2	0	2	0	1	0	1	0	0
16S_OTU02860	Bacteria	unclassified	unclassified	unclassified	unclassified	unclassified	10.0704	0.148075	0.004	0.00846343	0.177921	-0.177921	1.39008	0.243852	28	2.28052e-05	0	3	4	0	0	1	3	3	4	0	1	0	1	1	0	0	0	0	3	1	1	0	0	0	0	0	0	0	0	0	0	0	0
16S_OTU03643	Bacteria	Dependentiae	Babeliae	Babeliales	unclassified	unclassified	8.75406	0.0938339	0.004	0.00846343	0.246734	-0.246734	1.32039	0.431837	94	7.65604e-05	4	6	6	6	0	1	0	0	0	3	0	1	2	0	3	0	5	3	0	0	6	0	0	1	0	2	1	11	8	13	4	4	0
16S_OTU03793	Bacteria	Chloroflexi	Anaerolineae	RBG-13-54-9	unclassified	unclassified	9.62129	0.180398	0.004	0.00846343	0.371281	-0.371281	0.995922	0.880367	26	2.11763e-05	0	0	0	0	0	0	0	0	0	0	0	0	0	0	0	0	0	0	0	2	0	0	2	1	1	0	0	2	0	1	3	2	4
16S_OTU04435	Bacteria	Patescibacteria	Parcubacteria	unclassified	unclassified	unclassified	8.72507	0.198318	0.004	0.00846343	0.213013	-0.213013	1.07459	0.898884	14	1.14026e-05	0	0	0	0	0	0	0	0	0	0	0	0	0	0	0	1	0	0	0	1	0	0	0	0	1	0	0	1	2	0	2	0	1
16S_OTU05574	Bacteria	Acidobacteria	Holophagae	Subgroup_7	unclassified	unclassified	8.53399	0.120696	0.004	0.00846343	0.27517	-0.27517	1.29365	0.474289	16	1.30316e-05	0	0	0	0	0	0	0	0	0	0	0	0	0	0	0	0	0	0	1	0	0	1	2	1	3	4	1	0	0	0	0	1	0
16S_OTU05639	Bacteria	Planctomycetes	Planctomycetacia	Isosphaerales	Isosphaeraceae	Singulisphaera	9.36334	0.211587	0.004	0.00846343	0.422395	-0.422395	1.19278	0.508202	50	4.07236e-05	1	2	4	1	2	6	9	1	6	0	2	0	1	1	2	0	0	1	1	2	2	0	0	0	0	2	2	1	0	1	0	0	0
16S_OTU07604	Bacteria	Verrucomicrobia	Verrucomicrobiae	Chthoniobacterales	Chthoniobacteraceae	Chthoniobacter	7.54784	0.178435	0.004	0.00846343	0.404028	-0.404028	0.909609	0.941144	21	1.71039e-05	0	0	0	0	0	0	0	0	1	1	0	0	1	1	0	5	3	0	0	0	0	0	0	0	0	0	0	5	1	0	1	0	1
16S_OTU00599	Bacteria	Acidobacteria	Acidobacteriia	Acidobacteriales	Acidobacteriaceae_(Subgroup_1)	unclassified	9.34373	0.161232	0.0041	0.00863426	0.460191	-0.460191	1.23239	0.302624	147	0.000119728	11	14	10	9	10	6	13	13	15	6	1	3	4	11	8	0	5	8	0	0	0	0	0	0	0	0	0	0	0	0	0	0	0
16S_OTU00993	Bacteria	Verrucomicrobia	Verrucomicrobiae	Chthoniobacterales	Chthoniobacteraceae	Chthoniobacter	9.49334	0.206939	0.0041	0.00863426	-0.58135	0.58135	0.730331	0.899857	614	0.000500086	7	12	26	7	6	13	8	17	12	32	26	24	30	17	17	25	12	22	28	10	12	26	13	18	10	11	19	12	44	14	15	11	16
16S_OTU01220	Bacteria	Proteobacteria	Deltaproteobacteria	Bdellovibrionales	Bdellovibrionaceae	OM27_clade	8.74234	0.174018	0.0041	0.00863426	0.502291	-0.502291	0.902988	0.842118	543	0.000442259	20	19	42	13	16	17	24	23	21	5	12	20	10	11	17	19	10	16	17	32	19	4	9	11	17	15	17	11	10	10	9	15	13
16S_OTU01493	Bacteria	Acidobacteria	Subgroup_6	unclassified	unclassified	unclassified	8.52465	0.187384	0.0041	0.00863426	-0.257788	0.257788	0.914974	1.03967	265	0.000215835	10	27	14	8	5	7	10	3	5	14	4	6	1	1	7	5	3	10	10	6	26	8	18	8	5	9	5	7	5	3	5	2	2
16S_OTU01589	Bacteria	Bacteroidetes	Bacteroidia	Sphingobacteriales	AKYH767	unclassified	9.95824	0.169138	0.0041	0.00863426	-0.0821725	0.0821725	0.665731	1.26544	157	0.000127872	1	1	4	9	10	6	7	6	9	1	7	13	8	5	7	10	9	15	0	1	2	0	3	0	0	1	2	1	5	5	3	2	1
16S_OTU02832	Bacteria	Patescibacteria	Parcubacteria	unclassified	unclassified	unclassified	6.8307	0.154407	0.0041	0.00863426	-0.340474	0.340474	0.721581	1.13695	48	3.90947e-05	0	3	0	1	0	0	0	1	1	1	0	0	1	0	1	0	1	0	0	1	1	0	0	0	0	0	1	1	1	4	5	13	1
16S_OTU00175	Bacteria	Acidobacteria	Subgroup_6	unclassified	unclassified	unclassified	10.2495	0.110309	0.0042	0.00877613	0.570908	-0.570908	0.98102	0.637343	598	0.000487055	1	6	5	3	0	2	2	1	2	0	5	0	0	0	0	2	2	1	36	22	28	7	32	26	10	18	36	5	3	33	60	41	51
16S_OTU00362	Bacteria	Acidobacteria	Subgroup_6	unclassified	unclassified	unclassified	9.58746	0.180755	0.0042	0.00877613	0.198716	-0.198716	1.10111	0.873364	360	0.00029321	21	31	32	23	24	23	20	29	31	14	6	8	12	16	18	2	21	8	2	1	0	0	0	1	1	1	1	2	0	0	0	2	2
16S_OTU01575	Bacteria	Patescibacteria	WWE3	unclassified	unclassified	unclassified	4.89795	0.0804577	0.0042	0.00877613	-0.00154019	0.00154019	0.646482	1.28097	55	4.4796e-05	0	0	0	0	3	1	2	14	30	0	1	0	1	0	0	0	0	0	0	0	0	0	0	0	1	1	1	0	0	0	0	0	0
16S_OTU01687	Bacteria	Bacteroidetes	Bacteroidia	Cytophagales	Microscillaceae	unclassified	10.3307	0.149219	0.0042	0.00877613	-0.268839	0.268839	0.554955	1.26404	223	0.000181627	7	1	5	6	2	14	7	8	10	1	7	4	1	5	5	12	15	22	1	0	3	0	0	0	6	4	10	11	7	6	6	6	5
16S_OTU01837	Bacteria	Hydrogenedentes	Hydrogenedentia	Hydrogenedentiales	Hydrogenedensaceae	unclassified	9.9133	0.1892	0.0042	0.00877613	0.260672	-0.260672	1.08603	0.857597	140	0.000114026	0	0	0	2	1	0	7	1	0	0	1	1	1	0	0	2	1	3	10	4	11	6	15	8	10	16	11	3	3	1	1	0	4
16S_OTU02047	Bacteria	Bacteroidetes	Bacteroidia	Sphingobacteriales	Sphingobacteriaceae	Mucilaginibacter	8.91789	0.0675906	0.0042	0.00877613	-0.130365	0.130365	0.646271	1.26695	122	9.93657e-05	8	6	5	1	6	3	10	2	3	13	15	19	3	4	8	2	4	4	1	0	0	0	2	1	0	0	1	1	0	0	0	0	0
16S_OTU03164	Bacteria	Firmicutes	Bacilli	Bacillales	Paenibacillaceae	Aneurinibacillus	7.85917	0.113902	0.0042	0.00877613	0.0842726	-0.0842726	1.09248	0.922098	54	4.39815e-05	2	5	11	0	0	0	14	6	5	3	0	3	0	1	0	0	1	0	0	0	0	0	1	0	1	0	0	0	0	0	0	0	0
16S_OTU03801	Bacteria	Proteobacteria	Gammaproteobacteria	Betaproteobacteriales	Methylophilaceae	Methylotenera	8.86536	0.164411	0.0042	0.00877613	0.274118	-0.274118	1.14164	0.772244	23	1.87329e-05	0	1	1	0	1	1	0	1	0	0	2	1	3	4	2	4	0	2	0	0	0	0	0	0	0	0	0	0	0	0	0	0	0
16S_OTU06389	Bacteria	Verrucomicrobia	Verrucomicrobiae	Pedosphaerales	Pedosphaeraceae	unclassified	8.87931	0.107273	0.0042	0.00877613	-0.229266	0.229266	0.865839	1.09446	32	2.60631e-05	0	0	0	0	0	0	0	3	1	0	0	1	2	5	3	3	3	4	0	0	1	0	1	0	0	1	2	0	1	0	0	0	0
16S_OTU09407	Bacteria	Patescibacteria	Parcubacteria	Candidatus_Nomurabacteria	unclassified	unclassified	7.79901	0.119953	0.0042	0.00877613	-0.13359	0.13359	0.888271	1.10996	544	0.000443073	14	16	13	6	22	9	12	31	45	2	6	16	18	12	17	18	35	20	8	6	11	0	2	4	3	15	1	30	20	58	20	18	10
16S_OTU00525	Bacteria	Actinobacteria	Acidimicrobiia	IMCC26256	unclassified	unclassified	10.0577	0.193871	0.0043	0.00895031	0.179222	-0.179222	1.24218	0.669171	382	0.000311129	5	11	28	15	10	8	5	10	11	24	15	18	20	12	24	20	20	14	8	4	6	4	5	9	11	10	5	13	8	3	4	5	5
16S_OTU02773	Bacteria	Gemmatimonadetes	S0134_terrestrial_group	unclassified	unclassified	unclassified	8.42657	0.121366	0.0043	0.00895031	0.490338	-0.490338	0.788104	0.963622	29	2.36197e-05	0	0	0	0	0	0	0	0	0	0	0	0	0	0	0	0	0	0	2	2	1	0	2	0	0	0	0	0	2	0	7	3	3
16S_OTU04632	Bacteria	Gemmatimonadetes	Gemmatimonadetes	Gemmatimonadales	Gemmatimonadaceae	unclassified	9.11572	0.142231	0.0043	0.00895031	-0.288586	0.288586	0.198731	1.35756	44	3.58368e-05	3	2	2	4	4	2	7	4	4	0	1	2	2	4	1	1	0	1	0	0	0	0	0	0	0	0	0	0	0	0	0	0	0
16S_OTU04875	Bacteria	Patescibacteria	Gracilibacteria	unclassified	unclassified	unclassified	9.83604	0.220861	0.0043	0.00895031	0.229357	-0.229357	1.00224	0.971051	67	5.45697e-05	2	0	0	2	0	0	0	2	2	0	1	1	3	1	0	2	1	7	2	2	3	1	2	0	0	0	2	2	0	6	5	3	1
16S_OTU08994	Bacteria	Fibrobacteres	Fibrobacteria	Fibrobacterales	Fibrobacteraceae	possible_genus_04	8.07496	0.191557	0.0043	0.00895031	-0.0386248	0.0386248	0.303024	1.40137	103	8.38907e-05	2	2	2	2	0	1	0	4	1	0	2	0	0	2	5	2	1	16	1	0	2	1	1	0	3	0	2	2	10	12	2	2	4
16S_OTU02657	Bacteria	Planctomycetes	Planctomycetacia	Gemmatales	Gemmataceae	unclassified	8.66205	0.166888	0.0044	0.0091443	0.469185	-0.469185	1.03664	0.719752	39	3.17644e-05	0	1	0	1	0	0	0	0	0	0	1	1	0	0	0	0	0	0	1	1	3	0	0	0	0	0	1	0	0	4	8	5	2
16S_OTU06072	Bacteria	Patescibacteria	ABY1	Candidatus_Uhrbacteria	unclassified	unclassified	9.6891	0.192357	0.0044	0.0091443	0.00390789	-0.00390789	0.838628	1.16426	21	1.71039e-05	3	1	0	4	1	3	3	1	2	0	0	2	0	0	1	0	0	0	0	0	0	0	0	0	0	0	0	0	0	0	0	0	0
16S_OTU01391	Bacteria	Proteobacteria	Alphaproteobacteria	Rhizobiales	Xanthobacteraceae	unclassified	10.6585	0.190636	0.0045	0.0093305	0.345359	-0.345359	1.01993	0.875204	448	0.000364884	6	17	18	16	21	9	13	20	15	9	7	13	17	6	24	16	19	12	7	8	3	4	2	4	8	12	15	5	13	16	21	19	17
16S_OTU01782	Bacteria	Actinobacteria	Actinobacteria	Corynebacteriales	Nocardiaceae	Rhodococcus	9.49452	0.21238	0.0045	0.0093305	0.341786	-0.341786	1.12905	0.732588	113	9.20354e-05	5	1	3	2	2	1	2	3	4	5	7	6	4	8	4	3	3	5	4	3	3	1	2	0	2	3	2	3	8	1	5	0	3
16S_OTU03235	Bacteria	Acidobacteria	Subgroup_15	unclassified	unclassified	unclassified	9.44405	0.0930328	0.0045	0.0093305	0.0982606	-0.0982606	1.25815	0.674852	41	3.33934e-05	6	7	8	2	2	0	1	2	3	3	0	2	1	0	4	0	0	0	0	0	0	0	0	0	0	0	0	0	0	0	0	0	0
16S_OTU00203	Bacteria	Bacteroidetes	Bacteroidia	Cytophagales	Microscillaceae	unclassified	9.37645	0.0823225	0.0046	0.00947937	0.420106	-0.420106	1.02126	0.801318	1617	0.001317	2	2	10	7	18	9	23	13	21	2	12	3	4	10	11	23	10	36	83	48	60	40	30	35	99	100	125	53	56	46	108	73	144
16S_OTU01104	Bacteria	Latescibacteria	unclassified	unclassified	unclassified	unclassified	9.84158	0.145722	0.0046	0.00947937	0.543208	-0.543208	1.19385	0.0931725	207	0.000168596	0	0	0	0	0	0	6	2	11	0	3	4	0	2	4	3	6	7	3	0	3	3	2	2	21	7	10	3	17	5	19	14	23
16S_OTU02035	Bacteria	Patescibacteria	Saccharimonadia	Saccharimonadales	unclassified	unclassified	8.52152	0.194297	0.0046	0.00947937	0.160114	-0.160114	1.16914	0.798534	62	5.04973e-05	3	2	3	0	5	2	1	4	0	3	9	5	4	3	4	4	7	3	0	0	0	0	0	0	0	0	0	0	0	0	0	0	0
16S_OTU02572	Bacteria	Proteobacteria	Deltaproteobacteria	Myxococcales	Polyangiaceae	unclassified	9.6387	0.151035	0.0046	0.00947937	0.0541385	-0.0541385	0.832266	1.16617	61	4.96828e-05	1	0	1	2	0	0	1	1	3	0	1	1	0	0	1	2	1	0	5	3	2	3	2	1	5	5	8	0	1	1	3	0	5
16S_OTU03500	Bacteria	Verrucomicrobia	Verrucomicrobiae	Pedosphaerales	Pedosphaeraceae	unclassified	8.73356	0.160785	0.0046	0.00947937	-0.00128219	0.00128219	0.891003	1.12469	19	1.5475e-05	0	0	0	0	0	0	0	0	0	0	1	0	0	0	0	2	0	0	1	4	2	1	2	2	3	0	1	0	0	0	0	0	0
16S_OTU04344	Bacteria	Acidobacteria	Subgroup_11	unclassified	unclassified	unclassified	9.07219	0.167274	0.0046	0.00947937	-0.451675	0.451675	0.434201	1.19928	40	3.25789e-05	0	0	0	0	0	0	0	0	0	0	1	0	0	0	0	0	0	0	3	2	2	0	0	4	0	0	0	0	2	3	4	3	6
16S_OTU04682	Bacteria	Proteobacteria	Gammaproteobacteria	Betaproteobacteriales	Rhodocyclaceae	Uliginosibacterium	8.39532	0.214253	0.0046	0.00947937	-0.148068	0.148068	0.821049	1.15684	39	3.17644e-05	0	0	0	0	0	1	0	0	0	8	1	3	0	2	4	1	2	10	0	0	0	0	0	0	0	0	0	0	1	0	0	0	0
16S_OTU05935	Bacteria	Acidobacteria	Subgroup_6	unclassified	unclassified	unclassified	9.17559	0.125029	0.0046	0.00947937	-0.228081	0.228081	0.896765	1.0698	32	2.60631e-05	0	0	0	0	0	0	0	0	0	0	0	1	0	0	0	0	1	0	0	1	0	1	1	1	2	0	3	0	0	3	1	1	3
16S_OTU01084	Bacteria	Proteobacteria	Gammaproteobacteria	Cellvibrionales	Cellvibrionaceae	Cellvibrio	7.23866	0.118925	0.0047	0.00965585	0.631444	-0.631444	0.906535	0.626632	139	0.000113212	12	5	9	6	5	2	5	3	5	6	5	9	3	4	3	5	2	2	3	5	5	15	6	5	2	1	0	3	1	0	0	1	0
16S_OTU01443	Bacteria	Proteobacteria	Gammaproteobacteria	Betaproteobacteriales	Burkholderiaceae	Burkholderia-Caballeronia-Paraburkholderia	9.19067	0.149124	0.0047	0.00965585	0.235887	-0.235887	1.07179	0.89009	126	0.000102624	15	14	25	6	11	1	7	8	12	16	1	2	1	1	4	1	0	0	0	1	0	0	0	0	0	0	0	0	0	0	0	0	0
16S_OTU03096	Bacteria	Planctomycetes	Planctomycetacia	Gemmatales	Gemmataceae	unclassified	10.2257	0.197367	0.0047	0.00965585	0.315458	-0.315458	0.985056	0.936884	46	3.74658e-05	0	0	0	0	0	0	0	0	0	0	0	0	0	0	0	0	0	0	1	0	4	0	2	0	0	0	0	0	3	4	9	8	0
16S_OTU04241	Bacteria	Proteobacteria	Deltaproteobacteria	Myxococcales	Haliangiaceae	Haliangium	9.72628	0.115862	0.0047	0.00965585	0.0256532	-0.0256532	1.14658	0.861849	109	8.87775e-05	2	7	9	3	2	0	2	3	4	8	5	10	6	5	5	2	2	0	1	6	4	0	1	1	0	0	1	3	3	2	2	3	3
16S_OTU00597	Bacteria	Acidobacteria	Holophagae	Subgroup_7	unclassified	unclassified	6.45021	0.0599082	0.0048	0.00979395	-0.454853	0.454853	0.626308	1.10835	433	0.000352667	51	104	172	1	6	2	13	7	3	44	3	4	7	4	11	0	0	0	0	0	0	0	0	0	1	0	0	0	0	0	0	0	0
16S_OTU00617	Bacteria	Proteobacteria	Alphaproteobacteria	Caulobacterales	Hyphomonadaceae	Hirschia	9.53664	0.111311	0.0048	0.00979395	-0.0883541	0.0883541	0.821206	1.16958	279	0.000227238	11	13	2	32	31	22	14	28	32	1	8	14	15	9	9	7	11	18	0	0	0	0	0	0	1	1	0	0	0	0	0	0	0
16S_OTU00851	Bacteria	Planctomycetes	Planctomycetacia	Planctomycetales	Rubinisphaeraceae	Planctomicrobium	9.41141	0.1959	0.0048	0.00979395	0.444162	-0.444162	1.18559	0.485215	181	0.00014742	1	1	0	6	2	3	3	9	5	1	3	2	5	4	1	5	8	2	6	5	7	2	3	3	7	3	3	8	7	13	12	13	9
16S_OTU01326	Bacteria	Acidobacteria	Acidobacteriia	Subgroup_13	unclassified	unclassified	8.60614	0.122681	0.0048	0.00979395	0.0118869	-0.0118869	0.903574	1.11449	154	0.000125429	18	24	35	3	12	6	9	5	10	19	0	0	2	4	6	0	0	1	0	0	0	0	0	0	0	0	0	0	0	0	0	0	0
16S_OTU02622	Bacteria	Proteobacteria	Deltaproteobacteria	Myxococcales	KD3-10	unclassified	9.7219	0.204168	0.0048	0.00979395	0.416242	-0.416242	1.22232	0.444812	28	2.28052e-05	0	2	1	1	0	0	0	0	1	0	0	0	0	1	2	0	1	2	0	2	0	0	0	0	0	0	0	2	1	3	3	0	0
16S_OTU03584	Bacteria	Proteobacteria	Gammaproteobacteria	Gammaproteobacteria_Incertae_Sedis	Gammaproteobacteria_Incertae_Sedis_Unknown_Family	Candidatus_Berkiella	9.91468	0.166711	0.0048	0.00979395	0.448793	-0.448793	0.96089	0.842014	39	3.17644e-05	0	0	0	4	2	1	2	3	4	0	0	0	0	0	0	0	0	0	5	1	2	0	2	0	0	2	2	1	0	0	2	1	0
16S_OTU03710	Bacteria	Verrucomicrobia	Verrucomicrobiae	Pedosphaerales	Pedosphaeraceae	unclassified	8.45958	0.132803	0.0048	0.00979395	-0.0688771	0.0688771	0.928257	1.08955	22	1.79184e-05	0	0	0	0	0	0	0	0	0	0	0	0	0	0	0	0	0	0	2	0	0	0	1	1	1	0	0	0	1	0	3	1	5
16S_OTU04014	Bacteria	Proteobacteria	Deltaproteobacteria	Myxococcales	Sandaracinaceae	unclassified	7.58395	0.110465	0.0048	0.00979395	0.0587908	-0.0587908	1.0653	0.957412	25	2.03618e-05	0	0	0	0	1	3	0	0	0	0	0	0	1	0	1	0	0	1	2	0	1	5	1	7	0	0	1	0	1	0	0	0	0
16S_OTU07042	Bacteria	Planctomycetes	Planctomycetacia	Gemmatales	Gemmataceae	unclassified	8.82485	0.197619	0.0048	0.00979395	0.506141	-0.506141	1.06326	0.621128	191	0.000155564	4	3	7	5	10	9	10	7	11	18	3	11	11	9	18	6	8	7	2	0	3	0	0	0	3	2	0	0	4	3	5	2	1
16S_OTU00281	Bacteria	Chloroflexi	Anaerolineae	RBG-13-54-9	unclassified	unclassified	9.24175	0.0782605	0.005	0.0101328	-0.554203	0.554203	0.563397	1.0445	369	0.00030054	8	0	2	12	19	13	19	36	41	17	0	9	39	39	24	37	23	31	0	0	0	0	0	0	0	0	0	0	0	0	0	0	0
16S_OTU00473	Bacteria	Proteobacteria	Gammaproteobacteria	Betaproteobacteriales	Burkholderiaceae	unclassified	9.47002	0.110034	0.005	0.0101328	-0.0493746	0.0493746	0.824009	1.17246	221	0.000179999	26	29	19	6	2	0	23	18	19	20	1	6	8	8	7	2	4	3	3	1	2	3	1	3	1	0	1	0	0	2	0	0	0
16S_OTU01255	Bacteria	Patescibacteria	Berkelbacteria	unclassified	unclassified	unclassified	7.67815	0.16606	0.005	0.0101328	-0.341402	0.341402	0.969993	0.933335	68	5.53842e-05	1	13	0	1	0	0	0	0	0	0	0	0	0	0	0	0	0	0	17	10	1	1	3	5	3	2	3	0	2	4	1	0	1
16S_OTU01512	Bacteria	Proteobacteria	Alphaproteobacteria	Rhizobiales	Rhizobiaceae	unclassified	8.00333	0.103759	0.005	0.0101328	0.298492	-0.298492	1.13112	0.768586	372	0.000302984	12	1	13	7	12	8	12	8	9	27	21	46	22	9	13	12	9	19	14	8	8	13	3	13	4	3	4	4	9	4	2	1	9
16S_OTU01778	Bacteria	Planctomycetes	Planctomycetacia	Pirellulales	Pirellulaceae	unclassified	9.35063	0.178415	0.005	0.0101328	0.0951111	-0.0951111	1.26357	0.665625	94	7.65604e-05	2	1	5	2	0	1	8	3	2	0	2	2	0	2	2	4	5	1	0	0	0	1	1	1	1	0	1	0	0	8	3	5	11
16S_OTU02345	Bacteria	Proteobacteria	Gammaproteobacteria	Enterobacteriales	Enterobacteriaceae	unclassified	4.05187	0.0927511	0.005	0.0101328	-0.266184	0.266184	0.615039	1.23714	43	3.50223e-05	0	0	2	0	0	0	0	0	0	4	1	1	0	0	1	3	2	18	0	0	2	0	2	0	0	0	0	1	2	0	0	0	0
16S_OTU02929	Bacteria	Cyanobacteria	Melainabacteria	Obscuribacterales	unclassified	unclassified	9.61498	0.168031	0.005	0.0101328	0.0282719	-0.0282719	0.929173	1.0926	86	7.00447e-05	3	4	10	8	7	6	10	5	10	0	2	9	1	1	1	2	0	2	0	0	1	0	0	0	0	0	0	0	1	3	0	0	0
16S_OTU05379	Bacteria	Acidobacteria	Holophagae	Subgroup_7	unclassified	unclassified	9.58417	0.228915	0.005	0.0101328	-0.0165051	0.0165051	0.94151	1.0825	28	2.28052e-05	1	0	2	3	2	1	2	2	1	0	0	0	0	1	0	0	2	0	0	2	3	0	0	1	1	0	2	0	0	0	0	0	1
16S_OTU05783	Bacteria	Planctomycetes	Phycisphaerae	Tepidisphaerales	WD2101_soil_group	unclassified	9.80941	0.145193	0.005	0.0101328	0.310604	-0.310604	1.27129	0.488199	83	6.76012e-05	5	5	7	4	1	3	6	8	4	2	2	2	0	0	2	0	3	1	3	3	1	1	3	0	1	2	0	2	4	3	0	0	1
16S_OTU00060	Bacteria	Proteobacteria	Gammaproteobacteria	Betaproteobacteriales	Nitrosomonadaceae	MND1	10.0481	0.19226	0.0051	0.0102659	0.503524	-0.503524	1.1967	0.299737	1589	0.0012942	18	25	12	18	7	7	14	11	21	10	23	13	20	17	17	11	22	9	60	83	68	48	74	78	70	54	57	38	86	63	113	101	60
16S_OTU00434	Bacteria	Bacteroidetes	Bacteroidia	Chitinophagales	Chitinophagaceae	unclassified	9.35645	0.0972216	0.0051	0.0102659	-0.58059	0.58059	0.629759	0.973859	318	0.000259002	0	0	0	0	0	0	1	0	0	0	5	2	0	0	1	4	2	12	7	8	17	4	2	5	26	27	31	14	18	14	29	13	25
16S_OTU00622	Bacteria	Gemmatimonadetes	Gemmatimonadetes	Gemmatimonadales	Gemmatimonadaceae	unclassified	6.83827	0.048439	0.0051	0.0102659	-0.470451	0.470451	0.64679	1.0825	194	0.000158008	7	4	0	15	6	10	10	10	10	2	5	6	3	4	7	24	33	21	0	1	2	0	0	0	3	0	1	1	1	4	0	0	0
16S_OTU01133	Bacteria	Acidobacteria	Thermoanaerobaculia	Thermoanaerobaculales	Thermoanaerobaculaceae	Subgroup_10	8.43467	0.130457	0.0051	0.0102659	0.279374	-0.279374	1.09735	0.830285	266	0.00021665	5	4	2	4	7	3	4	8	2	1	0	2	2	1	5	0	2	0	7	7	13	2	7	3	13	9	10	12	12	22	16	17	8
16S_OTU01206	Bacteria	Actinobacteria	Acidimicrobiia	unclassified	unclassified	unclassified	9.68446	0.107023	0.0051	0.0102659	-0.130901	0.130901	1.11473	0.883133	123	0.00010018	1	2	1	0	1	0	2	1	1	1	1	2	1	0	0	1	0	1	4	12	4	2	1	1	5	7	6	4	4	3	9	10	10
16S_OTU03084	Bacteria	Proteobacteria	Gammaproteobacteria	Betaproteobacteriales	Burkholderiaceae	Hydrogenophaga	9.39148	0.132698	0.0051	0.0102659	0.40603	-0.40603	1.23303	0.435149	80	6.51578e-05	0	0	1	0	0	0	2	0	0	0	2	3	0	0	0	0	1	0	7	1	1	7	5	11	3	11	9	1	6	5	1	1	0
16S_OTU03630	Bacteria	Planctomycetes	Planctomycetacia	Gemmatales	Gemmataceae	Gemmata	7.52603	0.131115	0.0051	0.0102659	-0.293939	0.293939	1.00528	0.930197	24	1.95473e-05	0	1	1	0	1	0	1	1	0	1	0	1	0	0	0	0	0	1	3	3	0	5	3	1	0	0	0	1	0	0	0	0	0
16S_OTU04080	Bacteria	Patescibacteria	Parcubacteria	unclassified	unclassified	unclassified	9.66079	0.163999	0.0051	0.0102659	-0.365674	0.365674	0.68855	1.14086	26	2.11763e-05	0	0	0	0	0	1	0	0	4	0	0	0	0	2	0	0	0	1	1	0	0	0	0	0	0	0	0	1	1	2	3	1	0
16S_OTU08803	Bacteria	Actinobacteria	Acidimicrobiia	Microtrichales	Ilumatobacteraceae	Ilumatobacter	6.89808	0.0590997	0.0051	0.0102659	-0.29562	0.29562	0.784217	1.12195	29	2.36197e-05	0	0	0	0	0	0	0	0	0	0	0	0	0	0	0	0	0	0	0	1	1	1	0	1	5	4	8	0	1	0	3	0	1
16S_OTU00615	Bacteria	Planctomycetes	Planctomycetacia	Planctomycetales	Rubinisphaeraceae	SH-PL14	8.90534	0.162363	0.0052	0.0104359	0.563375	-0.563375	1.04865	0.535761	823	0.000670311	8	11	4	16	4	10	13	8	15	6	21	14	15	7	11	19	18	28	35	29	33	9	7	35	44	43	32	18	14	38	60	41	40
16S_OTU03620	Bacteria	Planctomycetes	Planctomycetacia	Planctomycetales	unclassified	unclassified	8.93787	0.186681	0.0052	0.0104359	-0.246829	0.246829	0.703524	1.19786	683	0.000556285	21	27	8	34	25	13	16	21	31	12	46	72	21	42	35	63	32	30	3	7	6	7	4	5	6	16	12	22	22	11	3	6	0
16S_OTU04004	Bacteria	Proteobacteria	Gammaproteobacteria	unclassified	unclassified	unclassified	4.86648	0.0734901	0.0052	0.0104359	-0.36609	0.36609	0.661519	1.15646	42	3.42079e-05	0	1	2	2	1	0	0	0	1	2	1	0	2	0	0	5	4	15	0	0	1	0	0	0	0	1	1	0	1	2	0	0	0
16S_OTU05960	Bacteria	Proteobacteria	Deltaproteobacteria	Myxococcales	unclassified	unclassified	7.76411	0.151781	0.0052	0.0104359	-0.245097	0.245097	0.867123	1.08614	15	1.22171e-05	0	0	0	0	0	0	0	1	1	0	0	0	0	0	0	1	0	1	0	0	0	0	0	0	0	0	0	0	0	1	1	2	1
16S_OTU00164	Bacteria	Proteobacteria	Alphaproteobacteria	Rhizobiales	KF-JG30-B3	unclassified	9.74741	0.216676	0.0053	0.0105578	-0.232177	0.232177	0.905273	1.06073	1679	0.0013675	42	27	43	42	40	34	41	41	46	22	57	59	31	29	40	42	40	31	55	63	48	30	36	42	48	57	67	62	64	35	72	50	67
16S_OTU01192	Bacteria	Acidobacteria	Subgroup_17	unclassified	unclassified	unclassified	8.32087	0.154259	0.0053	0.0105578	0.19512	-0.19512	1.2188	0.701947	214	0.000174297	5	2	1	6	3	1	4	12	9	11	21	10	5	7	8	5	12	4	4	1	8	5	5	7	8	0	2	1	1	2	7	6	8
16S_OTU01353	Bacteria	Planctomycetes	Phycisphaerae	CCM11a	unclassified	unclassified	10.5095	0.119885	0.0053	0.0105578	-0.370106	0.370106	0.889832	0.988408	417	0.000339635	4	4	0	8	9	7	10	13	16	4	8	3	5	8	7	8	8	11	13	12	8	4	8	7	17	26	20	8	8	22	21	25	25
16S_OTU02697	Bacteria	Patescibacteria	Parcubacteria	Candidatus_Kaiserbacteria	unclassified	unclassified	6.79844	0.0482193	0.0053	0.0105578	-0.13731	0.13731	1.08649	0.915667	38	3.095e-05	0	0	0	0	0	1	0	0	0	0	0	0	0	0	0	1	0	0	0	0	0	1	0	0	5	13	9	1	0	0	1	4	2
16S_OTU02821	Bacteria	Patescibacteria	Saccharimonadia	Saccharimonadales	unclassified	unclassified	8.46646	0.199004	0.0053	0.0105578	0.446188	-0.446188	1.03878	0.747111	43	3.50223e-05	5	3	0	2	3	3	3	7	3	0	0	2	0	2	0	0	0	0	0	1	2	3	0	0	0	0	0	0	0	2	0	1	0
16S_OTU03163	Bacteria	Proteobacteria	Gammaproteobacteria	Xanthomonadales	Rhodanobacteraceae	unclassified	8.59424	0.172288	0.0053	0.0105578	0.177222	-0.177222	0.876443	1.10642	30	2.44342e-05	0	0	1	1	1	0	1	2	0	0	0	0	0	0	0	0	0	1	3	3	2	1	2	2	1	1	2	1	5	0	0	0	0
16S_OTU03182	Bacteria	Patescibacteria	Parcubacteria	unclassified	unclassified	unclassified	9.06465	0.140844	0.0053	0.0105578	-0.0280078	0.0280078	1.23935	0.721919	25	2.03618e-05	0	0	0	0	0	0	0	0	0	0	1	0	0	0	0	0	0	0	1	0	0	0	0	0	2	0	2	1	0	0	3	4	1
16S_OTU04319	Bacteria	Bacteroidetes	Bacteroidia	Chitinophagales	unclassified	unclassified	9.19152	0.182177	0.0053	0.0105578	0.119534	-0.119534	0.899854	1.10401	16	1.30316e-05	0	0	0	0	0	0	1	2	0	0	0	1	0	0	0	1	1	1	0	0	0	0	0	0	0	0	0	1	0	1	3	1	1
16S_OTU05147	Bacteria	Patescibacteria	Parcubacteria	Candidatus_Adlerbacteria	unclassified	unclassified	8.737	0.115174	0.0053	0.0105578	0.338592	-0.338592	1.00193	0.90121	142	0.000115655	1	7	5	17	11	7	13	10	15	5	1	4	5	1	4	3	7	5	5	0	3	0	0	1	0	0	1	0	1	2	1	3	0
16S_OTU09371	Bacteria	unclassified	unclassified	unclassified	unclassified	unclassified	8.42888	0.187032	0.0053	0.0105578	0.159074	-0.159074	0.608793	1.27852	21	1.71039e-05	0	0	0	0	0	0	0	1	0	0	5	2	0	0	0	2	2	0	0	0	0	0	0	0	0	1	0	0	0	0	2	0	3
16S_OTU01414	Bacteria	Proteobacteria	Gammaproteobacteria	Betaproteobacteriales	Nitrosomonadaceae	MND1	9.1231	0.114941	0.0054	0.0107332	0.230683	-0.230683	1.0924	0.867634	117	9.52933e-05	8	4	8	9	13	2	11	12	14	0	0	2	4	4	1	5	1	3	1	0	1	0	0	0	0	0	0	0	0	2	3	3	0
16S_OTU02055	Bacteria	Planctomycetes	Phycisphaerae	Tepidisphaerales	WD2101_soil_group	unclassified	9.61573	0.127074	0.0054	0.0107332	-0.457933	0.457933	0.521548	1.15876	283	0.000230496	9	7	19	6	6	8	11	6	11	14	18	20	9	11	12	8	22	20	11	4	5	1	1	1	7	5	3	10	11	6	0	0	0
16S_OTU03446	Bacteria	unclassified	unclassified	unclassified	unclassified	unclassified	9.30193	0.106998	0.0054	0.0107332	0.0496938	-0.0496938	1.11201	0.903893	105	8.55196e-05	3	0	10	10	3	2	3	4	7	4	6	6	1	0	0	3	1	3	0	3	1	0	1	0	10	7	9	0	0	0	0	2	2
16S_OTU00087	Bacteria	Chloroflexi	JG30-KF-CM66	unclassified	unclassified	unclassified	8.71472	0.203368	0.0055	0.0108917	-0.172686	0.172686	0.570479	1.29237	725	0.000590493	9	15	4	20	14	16	19	13	10	1	6	2	9	3	10	10	13	11	58	45	26	16	30	42	28	41	33	17	40	21	25	28	23
16S_OTU01227	Bacteria	Gemmatimonadetes	Gemmatimonadetes	Gemmatimonadales	Gemmatimonadaceae	Gemmatimonas	7.7588	0.0774517	0.0055	0.0108917	0.0466199	-0.0466199	1.01744	1.00947	158	0.000128687	17	32	33	8	9	4	5	3	5	16	1	4	2	5	8	1	3	0	0	0	0	0	0	0	1	0	0	1	0	0	0	0	0
16S_OTU02565	Bacteria	Chloroflexi	Anaerolineae	SBR1031	A4b	unclassified	5.93831	0.11084	0.0055	0.0108917	0.174499	-0.174499	1.05676	0.936805	70	5.70131e-05	0	0	0	0	0	0	0	0	0	0	1	0	0	0	0	0	0	0	16	1	21	3	5	2	5	3	2	2	3	3	0	1	1
16S_OTU02803	Bacteria	Bacteroidetes	Bacteroidia	Flavobacteriales	Crocinitomicaceae	Fluviicola	9.45411	0.228825	0.0055	0.0108917	-0.128301	0.128301	1.18642	0.785097	78	6.35289e-05	2	0	3	3	0	2	0	2	6	0	0	0	1	1	0	1	1	4	7	3	6	3	2	6	2	4	4	0	4	1	1	3	1
16S_OTU08945	Bacteria	Actinobacteria	Thermoleophilia	Gaiellales	unclassified	unclassified	8.32036	0.115353	0.0055	0.0108917	-0.430512	0.430512	0.807552	1.00707	185	0.000150677	13	21	34	3	15	3	22	15	11	12	0	0	11	10	14	0	0	1	0	0	0	0	0	0	0	0	0	0	0	0	0	0	0
16S_OTU00467	Bacteria	Actinobacteria	Acidimicrobiia	Microtrichales	unclassified	unclassified	8.53671	0.17439	0.0056	0.0110328	0.655774	-0.655774	0.717216	0.796086	207	0.000168596	2	0	1	2	0	0	3	0	4	0	7	4	0	0	0	5	2	1	15	5	11	2	10	9	2	9	10	16	15	13	13	8	11
16S_OTU00569	Bacteria	Chloroflexi	KD4-96	unclassified	unclassified	unclassified	8.58866	0.157811	0.0056	0.0110328	0.159954	-0.159954	0.74123	1.20633	166	0.000135202	9	6	1	8	3	2	18	18	11	1	5	5	0	4	1	1	8	2	3	0	5	2	2	5	19	10	1	3	4	3	1	1	0
16S_OTU00632	Bacteria	Acidobacteria	Subgroup_25	unclassified	unclassified	unclassified	8.80201	0.113681	0.0056	0.0110328	-0.219331	0.219331	0.919483	1.05428	176	0.000143347	0	0	0	0	0	0	9	0	0	0	0	0	0	0	0	0	0	0	7	4	8	10	9	5	24	22	25	2	20	1	4	3	8
16S_OTU01963	Bacteria	unclassified	unclassified	unclassified	unclassified	unclassified	8.02472	0.176316	0.0056	0.0110328	0.0376035	-0.0376035	0.953441	1.07088	45	3.66513e-05	0	0	0	0	0	0	0	0	0	0	0	0	0	0	0	0	0	0	0	0	1	0	0	0	1	0	2	2	0	4	12	6	0
16S_OTU03668	Bacteria	Proteobacteria	Deltaproteobacteria	Myxococcales	Sandaracinaceae	unclassified	9.59443	0.137636	0.0056	0.0110328	0.278371	-0.278371	0.837426	1.09245	25	2.03618e-05	0	0	2	0	0	0	0	0	1	0	0	3	1	3	1	4	3	3	1	0	0	1	1	0	0	0	0	0	0	0	1	0	0
16S_OTU04869	Bacteria	Patescibacteria	Saccharimonadia	Saccharimonadales	unclassified	unclassified	6.12914	0.136603	0.0056	0.0110328	-0.670284	0.670284	0.361366	0.988342	25	2.03618e-05	0	1	5	1	0	0	0	1	1	0	0	0	0	0	0	0	0	0	0	2	1	6	2	1	0	1	0	0	0	0	0	1	2
16S_OTU05241	Bacteria	Proteobacteria	Gammaproteobacteria	Betaproteobacteriales	Nitrosomonadaceae	MND1	8.9038	0.0994498	0.0056	0.0110328	0.330547	-0.330547	1.29179	0.398392	485	0.000395019	0	4	0	9	2	5	5	6	7	4	11	8	6	1	3	16	22	19	36	34	11	19	23	24	14	4	5	10	9	13	35	20	19
16S_OTU01645	Bacteria	Proteobacteria	Gammaproteobacteria	Betaproteobacteriales	Burkholderiaceae	Polaromonas	6.32544	0.104348	0.0057	0.0111807	0.150043	-0.150043	0.90116	1.09502	194	0.000158008	3	1	3	3	1	2	0	8	4	3	2	1	1	4	2	8	5	12	7	3	12	30	12	12	15	8	9	2	5	3	4	1	1
16S_OTU02204	Bacteria	Proteobacteria	Gammaproteobacteria	unclassified	unclassified	unclassified	8.26903	0.0866036	0.0057	0.0111807	0.351622	-0.351622	1.18845	0.620157	105	8.55196e-05	0	3	1	3	3	1	1	3	3	0	0	0	0	0	0	1	0	0	3	4	5	2	0	1	12	17	12	8	0	4	6	1	3
16S_OTU02327	Bacteria	unclassified	unclassified	unclassified	unclassified	unclassified	8.75631	0.103704	0.0057	0.0111807	0.0445135	-0.0445135	1.0126	1.01452	98	7.98183e-05	1	3	0	7	0	2	0	2	3	0	0	0	0	1	2	0	1	0	1	1	6	0	1	0	1	2	4	2	1	2	13	5	11
16S_OTU02688	Bacteria	Verrucomicrobia	Verrucomicrobiae	S-BQ2-57_soil_group	unclassified	unclassified	8.76979	0.181983	0.0057	0.0111807	0.0626347	-0.0626347	0.968001	1.05522	68	5.53842e-05	0	0	0	1	0	0	0	0	0	0	2	1	0	1	0	5	5	2	1	0	3	3	2	2	1	0	4	7	9	3	3	0	2
16S_OTU02893	Bacteria	Proteobacteria	Deltaproteobacteria	Bdellovibrionales	Bdellovibrionaceae	OM27_clade	9.35143	0.206907	0.0057	0.0111807	-0.0614748	0.0614748	1.10814	0.907112	50	4.07236e-05	1	1	1	2	5	1	5	2	5	1	0	0	0	0	2	2	0	2	3	0	2	1	2	0	2	1	3	0	3	1	0	1	0
16S_OTU04936	Bacteria	Verrucomicrobia	Verrucomicrobiae	Pedosphaerales	Pedosphaeraceae	unclassified	8.96128	0.208981	0.0057	0.0111807	-0.188545	0.188545	1.01225	0.97923	49	3.99092e-05	4	2	6	3	5	4	3	2	3	0	0	3	1	1	4	3	0	0	0	0	1	1	1	0	1	0	0	0	0	1	0	0	0
16S_OTU00039	Bacteria	Chloroflexi	Anaerolineae	SBR1031	A4b	unclassified	8.68671	0.0541748	0.0058	0.0113191	0.44397	-0.44397	1.04847	0.736294	1190	0.000969223	0	0	0	0	0	0	0	0	0	0	25	0	0	0	0	0	0	0	111	119	96	22	50	95	3	1	2	12	27	36	119	82	78
16S_OTU00148	Bacteria	Planctomycetes	Planctomycetacia	Pirellulales	Pirellulaceae	unclassified	8.49443	0.100347	0.0058	0.0113191	-0.328522	0.328522	0.867766	1.03791	2294	0.0018684	104	105	122	117	94	100	155	133	130	90	68	89	91	77	70	80	69	64	32	19	38	23	25	28	45	32	28	49	52	35	30	22	22
16S_OTU00961	Bacteria	Proteobacteria	Gammaproteobacteria	unclassified	unclassified	unclassified	7.63454	0.125039	0.0058	0.0113191	0.0590488	-0.0590488	1.18273	0.807832	76	6.18999e-05	7	8	12	0	1	2	7	1	19	1	0	0	0	0	0	0	0	0	2	0	5	0	0	0	0	0	0	0	0	0	1	4	0
16S_OTU01413	Bacteria	Chloroflexi	Anaerolineae	Anaerolineales	Anaerolineaceae	unclassified	9.2221	0.113297	0.0058	0.0113191	-0.0347261	0.0347261	1.06048	0.965223	489	0.000398277	9	3	19	25	23	22	19	19	37	2	14	8	13	11	12	19	26	25	23	10	19	10	9	10	14	14	17	5	15	8	7	2	7
16S_OTU01451	Bacteria	Acidobacteria	Subgroup_6	unclassified	unclassified	unclassified	8.90813	0.106143	0.0058	0.0113191	-0.278836	0.278836	0.774954	1.13738	179	0.000145791	5	2	1	12	19	15	9	12	23	0	0	1	4	7	2	13	4	16	3	0	0	13	5	5	0	1	0	2	3	1	0	0	0
16S_OTU05246	Bacteria	Planctomycetes	OM190	unclassified	unclassified	unclassified	8.3672	0.114824	0.0058	0.0113191	-0.13344	0.13344	0.879461	1.11699	18	1.46605e-05	0	0	1	0	1	0	1	1	1	0	0	0	1	0	2	0	0	1	0	0	0	0	0	0	0	0	0	2	3	1	1	2	0
16S_OTU05409	Bacteria	Planctomycetes	Phycisphaerae	Phycisphaerales	Phycisphaeraceae	SM1A02	8.83246	0.162126	0.0058	0.0113191	0.331888	-0.331888	0.948482	0.962261	54	4.39815e-05	1	0	0	3	2	1	3	2	1	0	0	2	1	4	2	6	5	2	0	1	0	0	1	1	1	1	0	0	0	3	1	1	1
16S_OTU00301	Bacteria	Proteobacteria	Gammaproteobacteria	Salinisphaerales	Solimonadaceae	Polycyclovorans	8.85514	0.0503961	0.0059	0.011456	0.334288	-0.334288	1.04338	0.856467	967	0.000787595	7	6	0	24	7	9	17	42	52	0	1	1	2	0	0	0	8	5	23	14	27	10	12	14	50	48	68	12	24	46	72	63	58
16S_OTU01245	Bacteria	Proteobacteria	Alphaproteobacteria	Rhodobacterales	Rhodobacteraceae	unclassified	9.20554	0.147019	0.0059	0.011456	-0.0468452	0.0468452	0.893434	1.12069	346	0.000281808	4	9	16	4	3	2	5	3	3	7	8	11	3	4	9	3	0	11	26	13	14	25	17	24	15	22	17	6	17	7	3	3	5
16S_OTU02329	Bacteria	Bacteroidetes	Bacteroidia	Chitinophagales	Chitinophagaceae	Flavisolibacter	7.54487	0.138266	0.0059	0.011456	0.666102	-0.666102	0.835601	0.648854	91	7.4117e-05	3	4	5	4	6	9	3	2	5	1	3	3	3	2	3	2	2	1	2	2	0	3	2	4	0	3	2	0	1	1	4	2	2
16S_OTU02834	Bacteria	Acidobacteria	Acidobacteriia	Solibacterales	Solibacteraceae_(Subgroup_3)	Paludibaculum	8.49001	0.168217	0.0059	0.011456	0.289213	-0.289213	1.09348	0.828247	70	5.70131e-05	0	0	0	5	0	2	2	1	0	0	0	0	0	1	0	1	4	1	2	6	6	2	5	12	5	3	2	1	4	2	0	0	0
16S_OTU03907	Bacteria	Verrucomicrobia	Verrucomicrobiae	Verrucomicrobiales	Verrucomicrobiaceae	unclassified	9.59309	0.0996688	0.0059	0.011456	0.354188	-0.354188	1.05784	0.821055	69	5.61986e-05	0	0	0	0	0	0	2	6	6	0	0	0	0	0	3	0	2	3	1	0	2	0	0	0	1	3	5	3	2	1	5	5	3
16S_OTU03957	Bacteria	Bacteroidetes	Bacteroidia	Bacteroidales	Prolixibacteraceae	BSV13	5.55628	0.0774929	0.0059	0.011456	-0.046551	0.046551	1.12251	0.891178	40	3.25789e-05	6	16	5	0	0	0	0	0	0	1	0	1	1	0	0	0	0	0	0	2	0	3	1	0	1	0	0	0	0	1	1	0	0
16S_OTU04568	Bacteria	Elusimicrobia	Lineage_IIb	unclassified	unclassified	unclassified	8.79835	0.224961	0.0059	0.011456	0.563354	-0.563354	0.982254	0.649559	22	1.79184e-05	0	0	0	0	0	0	0	1	0	1	1	1	0	2	1	0	1	1	0	1	2	0	0	0	0	0	1	1	0	1	3	1	1
16S_OTU01198	Bacteria	Actinobacteria	Acidimicrobiia	IMCC26256	unclassified	unclassified	7.8048	0.145471	0.006	0.0115916	-0.468519	0.468519	0.746421	1.01825	189	0.000153935	10	9	7	16	28	10	23	15	14	2	7	13	6	5	8	3	10	3	0	0	0	0	0	0	0	0	0	0	0	0	0	0	0
16S_OTU01659	Bacteria	Actinobacteria	Acidimicrobiia	Microtrichales	Ilumatobacteraceae	unclassified	9.44701	0.252891	0.006	0.0115916	0.43808	-0.43808	0.851968	0.962584	109	8.87775e-05	2	1	2	0	3	2	3	3	1	4	8	2	2	3	3	9	3	2	5	4	2	0	4	1	1	3	2	3	7	3	4	2	6
16S_OTU01741	Bacteria	Cyanobacteria	Oxyphotobacteria	Nostocales	Phormidiaceae	Tychonema_CCAP_1459-11B	6.76402	0.133771	0.006	0.0115916	-0.509463	0.509463	0.539422	1.10372	44	3.58368e-05	0	6	1	14	3	3	6	4	2	0	0	0	0	0	1	0	0	0	0	0	0	0	0	0	0	0	0	0	0	1	1	0	0
16S_OTU02949	Bacteria	Proteobacteria	Gammaproteobacteria	Gammaproteobacteria_Incertae_Sedis	Gammaproteobacteria_Incertae_Sedis_Unknown_Family	Candidatus_Berkiella	8.5642	0.112856	0.006	0.0115916	-0.188212	0.188212	0.685747	1.23027	80	6.51578e-05	6	12	6	3	5	5	3	1	4	6	4	4	0	0	0	1	2	2	0	0	1	0	1	2	3	2	1	0	2	0	1	3	0
16S_OTU03321	Bacteria	Planctomycetes	Planctomycetacia	Pirellulales	Pirellulaceae	unclassified	7.54844	0.17294	0.006	0.0115916	0.331174	-0.331174	1.17321	0.670932	40	3.25789e-05	0	0	0	0	0	0	0	0	1	1	2	1	0	1	3	1	1	8	0	0	4	0	1	1	1	0	0	5	3	2	0	2	0
16S_OTU06415	Bacteria	Chloroflexi	Anaerolineae	Ardenticatenales	unclassified	unclassified	8.62715	0.0958256	0.006	0.0115916	-0.238083	0.238083	0.783471	1.15107	26	2.11763e-05	0	0	0	0	0	0	0	0	0	0	0	0	0	0	0	0	0	0	2	0	1	1	2	2	0	0	0	0	1	0	3	1	4
16S_OTU08544	Bacteria	Bacteroidetes	Bacteroidia	Sphingobacteriales	Sphingobacteriaceae	unclassified	8.98104	0.201238	0.006	0.0115916	-0.300197	0.300197	0.994565	0.937457	31	2.52487e-05	4	2	4	4	0	3	2	2	3	0	2	0	0	0	2	1	0	0	0	0	0	0	1	0	0	0	0	1	0	0	0	0	0
16S_OTU00627	Bacteria	Planctomycetes	Planctomycetacia	Pirellulales	Pirellulaceae	unclassified	7.93651	0.171005	0.0061	0.0117175	-0.193886	0.193886	0.879573	1.09798	242	0.000197102	20	13	27	14	27	17	15	9	18	12	2	11	14	9	5	13	5	5	0	0	0	0	0	0	1	2	0	1	1	1	0	0	0
16S_OTU00979	Bacteria	Patescibacteria	ABY1	Candidatus_Magasanikbacteria	unclassified	unclassified	5.13008	0.0793445	0.0061	0.0117175	-0.585772	0.585772	0.547111	1.0163	84	6.84157e-05	1	1	9	2	1	4	7	13	33	0	0	1	2	1	2	1	2	0	0	0	0	0	0	0	0	0	0	3	1	0	0	0	0
16S_OTU01800	Bacteria	Planctomycetes	OM190	unclassified	unclassified	unclassified	9.03728	0.174869	0.0061	0.0117175	-0.128985	0.128985	1.08039	0.925386	35	2.85065e-05	0	0	0	1	0	2	2	2	1	0	0	0	0	0	0	0	1	0	2	3	3	3	1	4	1	1	0	1	1	2	2	0	0
16S_OTU02357	Bacteria	Bacteroidetes	Bacteroidia	Chitinophagales	Chitinophagaceae	unclassified	8.95584	0.195682	0.0061	0.0117175	-0.37026	0.37026	0.741559	1.1039	93	7.5746e-05	2	6	4	0	1	3	2	8	4	10	4	8	3	10	5	11	6	5	0	0	1	0	0	0	0	0	0	0	0	0	0	0	0
16S_OTU03455	Bacteria	Gemmatimonadetes	Gemmatimonadetes	Gemmatimonadales	Gemmatimonadaceae	unclassified	9.37854	0.060853	0.0061	0.0117175	0.311003	-0.311003	0.707745	1.16323	49	3.99092e-05	5	6	9	1	1	1	0	0	0	4	3	7	0	0	0	0	0	0	0	0	4	0	0	0	3	3	2	0	0	0	0	0	0
16S_OTU03920	Bacteria	Acidobacteria	Subgroup_9	unclassified	unclassified	unclassified	7.64314	0.17735	0.0061	0.0117175	0.142528	-0.142528	1.25702	0.660074	45	3.66513e-05	0	0	0	0	0	0	0	0	0	0	2	0	0	0	0	0	0	0	2	1	0	2	1	1	0	1	1	0	1	7	5	4	1
16S_OTU04883	Bacteria	Planctomycetes	Planctomycetacia	Pirellulales	Pirellulaceae	unclassified	8.51554	0.136454	0.0061	0.0117175	0.505314	-0.505314	1.16023	0.41469	16	1.30316e-05	0	0	0	0	0	0	2	2	0	1	3	2	1	0	1	1	2	1	0	0	0	0	0	0	0	0	0	0	0	0	0	0	0
16S_OTU08669	Bacteria	Patescibacteria	ABY1	Candidatus_Kuenenbacteria	unclassified	unclassified	7.6884	0.0871298	0.0061	0.0117175	0.160709	-0.160709	1.0707	0.926143	23	1.87329e-05	1	0	0	1	1	1	1	0	2	0	0	1	1	2	0	2	1	0	0	0	0	0	0	0	0	0	0	2	5	2	0	0	0
16S_OTU00743	Bacteria	Acidobacteria	Subgroup_6	unclassified	unclassified	unclassified	8.51937	0.0958423	0.0062	0.0119011	0.0727828	-0.0727828	1.2293	0.73242	454	0.000369771	1	0	0	5	1	0	8	6	5	0	9	6	0	0	0	5	8	3	20	20	14	8	9	17	34	21	28	10	13	16	47	24	31
16S_OTU00948	Bacteria	Planctomycetes	OM190	unclassified	unclassified	unclassified	8.06877	0.163198	0.0063	0.01205	-0.216659	0.216659	0.757572	1.17707	133	0.000108325	2	1	1	0	2	3	0	2	3	0	3	3	1	0	4	1	1	5	4	8	3	0	8	1	6	2	1	6	14	14	10	4	6
16S_OTU01195	Bacteria	unclassified	unclassified	unclassified	unclassified	unclassified	8.9937	0.128762	0.0063	0.01205	-0.106611	0.106611	1.19725	0.77546	92	7.49315e-05	0	0	0	0	0	0	0	0	0	0	4	0	0	0	1	0	0	0	1	2	4	0	1	0	9	6	9	1	5	9	7	9	7
16S_OTU01476	Bacteria	Planctomycetes	Planctomycetacia	Gemmatales	Gemmataceae	unclassified	8.3925	0.172542	0.0063	0.01205	-0.35217	0.35217	0.750413	1.11043	226	0.000184071	17	11	24	8	12	19	13	13	15	9	6	1	5	7	4	8	1	6	1	1	3	1	3	3	2	1	5	4	5	2	6	2	2
16S_OTU04761	Bacteria	Planctomycetes	Phycisphaerae	Phycisphaerales	Phycisphaeraceae	SM1A02	9.0012	0.0847042	0.0063	0.01205	-0.0916017	0.0916017	0.756688	1.21181	21	1.71039e-05	0	0	0	0	0	0	0	0	0	0	0	0	0	0	0	0	0	0	2	2	3	0	0	0	3	3	2	1	2	0	0	1	0
16S_OTU04777	Bacteria	Bacteroidetes	Bacteroidia	Sphingobacteriales	env.OPS_17	unclassified	5.0967	0.127016	0.0063	0.01205	-0.387519	0.387519	0.658033	1.14359	23	1.87329e-05	1	1	1	1	1	7	0	0	0	0	0	0	0	1	0	2	0	0	0	2	0	2	1	1	0	1	1	0	0	0	0	0	0
16S_OTU00468	Bacteria	Proteobacteria	Alphaproteobacteria	Rhizobiales	Beijerinckiaceae	alphaI_cluster	8.15646	0.151373	0.0064	0.0122066	0.204332	-0.204332	1.13017	0.832545	420	0.000342079	15	12	20	10	19	12	16	11	12	31	15	11	7	11	13	8	5	13	22	11	21	10	9	23	14	15	11	2	7	5	5	4	10
16S_OTU00491	Bacteria	Firmicutes	Bacilli	Bacillales	Bacillaceae	Bacillus	9.49594	0.20392	0.0064	0.0122066	0.380764	-0.380764	0.919942	0.951583	203	0.000165338	13	4	18	10	3	5	4	9	4	13	4	10	13	9	9	10	9	10	3	0	1	5	1	0	1	1	2	2	1	1	7	8	6
16S_OTU00729	Bacteria	Nitrospirae	Nitrospira	Nitrospirales	Nitrospiraceae	Nitrospira	8.67833	0.168449	0.0064	0.0122066	0.272318	-0.272318	1.2661	0.546602	129	0.000105067	0	0	0	0	0	0	0	0	0	0	0	0	0	0	0	0	0	0	12	9	2	1	8	4	3	1	3	5	3	14	13	8	6
16S_OTU01034	Bacteria	Acidobacteria	Holophagae	Subgroup_7	unclassified	unclassified	6.09532	0.121476	0.0064	0.0122066	0.458843	-0.458843	1.16257	0.511282	377	0.000307056	7	10	12	27	5	12	9	14	8	23	9	37	69	15	33	6	9	15	1	4	1	4	1	3	1	7	2	2	13	2	1	3	3
16S_OTU00353	Bacteria	Planctomycetes	Planctomycetacia	Gemmatales	Gemmataceae	Fimbriiglobus	9.0634	0.107726	0.0065	0.0123622	-0.0571708	0.0571708	1.15056	0.853293	305	0.000248414	0	0	2	1	2	1	12	3	4	2	3	2	0	2	4	10	4	18	13	5	6	5	6	4	17	28	18	14	28	13	15	9	16
16S_OTU00610	Bacteria	Latescibacteria	unclassified	unclassified	unclassified	unclassified	6.68621	0.162551	0.0065	0.0123622	0.565918	-0.565918	0.835979	0.825687	194	0.000158008	0	0	0	0	0	0	0	0	0	0	0	1	0	0	0	0	2	0	14	7	7	3	9	5	7	1	8	6	7	15	9	23	20
16S_OTU01496	Bacteria	Latescibacteria	unclassified	unclassified	unclassified	unclassified	8.11724	0.0859341	0.0065	0.0123622	0.0883615	-0.0883615	1.17279	0.816615	57	4.6425e-05	0	0	0	0	0	0	0	0	0	0	0	0	0	0	0	0	0	0	3	4	1	1	2	4	0	3	0	0	0	0	9	11	4
16S_OTU03683	Bacteria	Planctomycetes	Planctomycetacia	Gemmatales	Gemmataceae	unclassified	7.30618	0.136587	0.0065	0.0123622	-0.0234809	0.0234809	0.736945	1.23068	33	2.68776e-05	0	0	0	0	0	0	0	0	0	0	0	0	0	0	0	0	0	0	2	3	0	0	0	1	0	0	0	0	0	2	9	1	3
16S_OTU00487	Bacteria	Planctomycetes	Planctomycetacia	Pirellulales	Pirellulaceae	Pirellula	7.68052	0.120474	0.0066	0.0125082	0.666272	-0.666272	0.954043	0.456686	187	0.000152306	1	0	1	0	3	0	0	1	1	0	2	4	0	1	0	4	1	2	31	6	14	22	15	16	5	9	4	7	10	5	5	2	7
16S_OTU02983	Bacteria	Actinobacteria	Actinobacteria	Frankiales	Geodermatophilaceae	Geodermatophilus	8.1256	0.12706	0.0066	0.0125082	0.32124	-0.32124	1.11243	0.776403	86	7.00447e-05	1	0	4	9	13	5	7	5	6	1	5	2	0	2	1	5	2	1	0	0	2	3	0	0	1	4	1	0	0	0	2	0	2
16S_OTU03889	Bacteria	Nitrospirae	Nitrospira	Nitrospirales	Nitrospiraceae	Nitrospira	8.45715	0.120921	0.0066	0.0125082	-0.460727	0.460727	0.496548	1.16737	120	9.77367e-05	2	10	6	2	8	3	10	16	14	0	9	6	1	0	1	1	1	2	3	0	0	0	0	2	3	2	5	0	0	0	4	2	2
16S_OTU04515	Bacteria	Proteobacteria	Gammaproteobacteria	Betaproteobacteriales	Nitrosomonadaceae	966-1	3.54423	0.0688081	0.0066	0.0125082	-0.209886	0.209886	1.08993	0.881816	31	2.52487e-05	0	0	0	0	0	0	0	0	0	0	0	0	0	0	0	0	0	0	0	0	3	0	0	0	0	1	0	3	4	15	1	1	1
16S_OTU06658	Bacteria	Gemmatimonadetes	Gemmatimonadetes	Gemmatimonadales	Gemmatimonadaceae	Gemmatimonas	7.63701	0.119384	0.0066	0.0125082	0.00805513	-0.00805513	0.68752	1.25937	48	3.90947e-05	7	4	15	2	1	0	4	3	5	6	0	0	0	0	1	0	0	0	0	0	0	0	0	0	0	0	0	0	0	0	0	0	0
16S_OTU00699	Bacteria	Acidobacteria	Thermoanaerobaculia	Thermoanaerobaculales	Thermoanaerobaculaceae	Subgroup_10	8.74858	0.191965	0.0067	0.0126531	0.672745	-0.672745	0.854874	0.607945	402	0.000327418	3	4	5	6	5	1	1	4	9	1	13	2	4	5	4	4	2	5	13	17	23	4	10	6	16	12	22	12	12	31	26	17	31
16S_OTU03320	Bacteria	Bacteroidetes	Bacteroidia	Chitinophagales	37-13	unclassified	8.43634	0.181965	0.0067	0.0126531	-0.207857	0.207857	1.07265	0.903739	87	7.08591e-05	7	4	12	7	4	8	5	1	7	3	1	3	2	3	4	2	2	1	2	0	2	0	2	1	0	0	0	0	0	3	0	0	1
16S_OTU03530	Bacteria	Proteobacteria	Alphaproteobacteria	Rhizobiales	Beijerinckiaceae	unclassified	8.12578	0.229506	0.0067	0.0126531	-0.201796	0.201796	1.07433	0.904654	121	9.85512e-05	5	13	10	15	4	4	4	9	8	4	1	4	3	5	2	3	3	5	0	2	2	3	0	2	0	1	4	0	3	0	0	0	2
16S_OTU04882	Bacteria	Elusimicrobia	Lineage_IIa	unclassified	unclassified	unclassified	7.39093	0.166838	0.0067	0.0126531	-0.346235	0.346235	0.700899	1.14617	13	1.05881e-05	0	0	0	2	0	0	0	0	0	1	0	0	1	0	0	1	3	1	0	0	0	0	0	0	0	0	0	1	0	1	0	1	0
16S_OTU06996	Bacteria	Proteobacteria	Alphaproteobacteria	unclassified	unclassified	unclassified	8.50869	0.141062	0.0067	0.0126531	0.641036	-0.641036	0.779116	0.762629	14	1.14026e-05	0	1	1	1	0	0	0	0	0	0	2	0	0	1	0	0	0	0	0	0	0	0	0	0	0	0	0	0	0	0	2	1	0
16S_OTU00067	Bacteria	Proteobacteria	Alphaproteobacteria	Rhizobiales	Devosiaceae	Devosia	8.60048	0.125717	0.0068	0.0127881	-0.241832	0.241832	1.17916	0.737946	3087	0.00251428	149	111	151	150	147	103	208	144	147	74	62	74	95	81	93	166	79	162	59	30	48	81	65	61	57	61	49	51	64	48	53	34	41
16S_OTU00252	Bacteria	Planctomycetes	Planctomycetacia	Gemmatales	Gemmataceae	unclassified	9.12005	0.169001	0.0068	0.0127881	-0.377588	0.377588	0.486237	1.23308	1841	0.00149945	49	70	49	41	48	54	51	47	49	53	32	38	39	50	29	52	32	53	57	61	51	50	64	84	79	81	73	33	64	36	63	41	44
16S_OTU00884	Bacteria	Chloroflexi	Anaerolineae	SBR1031	A4b	unclassified	8.67308	0.164713	0.0068	0.0127881	-0.415991	0.415991	0.646258	1.12903	223	0.000181627	0	0	0	1	1	3	3	4	14	0	6	1	2	1	3	2	1	0	8	13	4	2	4	8	7	8	11	12	9	16	10	21	13
16S_OTU01789	Bacteria	Proteobacteria	Alphaproteobacteria	Rhizobiales	Xanthobacteraceae	Pseudorhodoplanes	9.26907	0.201372	0.0068	0.0127881	-0.162304	0.162304	0.905587	1.08764	609	0.000496014	22	14	16	18	22	9	17	20	18	17	9	25	18	26	24	29	12	30	8	15	5	14	9	8	12	20	27	17	22	18	11	19	13
16S_OTU02652	Bacteria	Actinobacteria	Acidimicrobiia	Microtrichales	Ilumatobacteraceae	unclassified	8.34385	0.135657	0.0068	0.0127881	-0.170814	0.170814	0.7143	1.21935	232	0.000188958	1	0	0	0	0	0	1	2	1	0	1	0	0	1	0	1	0	1	11	11	0	5	12	22	8	11	4	18	26	22	11	7	24
16S_OTU03457	Bacteria	Proteobacteria	Gammaproteobacteria	Betaproteobacteriales	SC-I-84	unclassified	5.64927	0.105209	0.0068	0.0127881	-0.324115	0.324115	0.83033	1.07094	53	4.31671e-05	0	0	0	0	0	0	0	0	0	0	0	0	0	0	0	0	0	0	3	4	0	0	3	0	0	0	0	0	1	1	6	4	17
16S_OTU00097	Bacteria	Acidobacteria	Blastocatellia_(Subgroup_4)	Blastocatellales	Blastocatellaceae	unclassified	9.09272	0.148273	0.0069	0.0129399	0.0593074	-0.0593074	1.23804	0.720167	2580	0.00210134	85	118	78	118	94	91	102	94	123	52	105	88	66	85	74	117	63	118	66	77	57	57	71	80	47	87	76	55	75	34	25	25	17
16S_OTU00946	Bacteria	Proteobacteria	Deltaproteobacteria	Myxococcales	Nannocystaceae	unclassified	9.12609	0.0732739	0.0069	0.0129399	-0.430519	0.430519	0.556791	1.16461	182	0.000148234	6	1	1	3	1	2	5	4	8	0	1	1	1	1	1	3	0	0	6	3	4	2	2	3	6	13	11	3	11	7	12	11	13
16S_OTU01617	Bacteria	Fibrobacteres	Fibrobacteria	Fibrobacterales	Fibrobacteraceae	possible_genus_04	4.74727	0.109228	0.0069	0.0129399	0.14546	-0.14546	0.865803	1.12446	308	0.000250858	9	14	9	16	9	11	8	11	20	12	7	24	16	19	11	28	10	60	2	1	1	0	0	0	2	0	0	2	1	3	0	0	1
16S_OTU04110	Bacteria	Gemmatimonadetes	Gemmatimonadetes	Gemmatimonadales	Gemmatimonadaceae	Gemmatimonas	8.32096	0.125243	0.0069	0.0129399	0.247846	-0.247846	0.74573	1.17159	20	1.62895e-05	3	3	4	2	1	0	1	0	1	2	0	0	0	0	1	1	0	0	0	0	0	0	0	0	1	0	0	0	0	0	0	0	0
16S_OTU00412	Bacteria	Proteobacteria	Gammaproteobacteria	Betaproteobacteriales	Burkholderiaceae	Polaromonas	4.62475	0.102958	0.007	0.0131092	0.106804	-0.106804	0.932199	1.07966	630	0.000513118	12	16	15	17	17	6	20	19	22	12	10	13	6	6	11	4	9	12	27	31	16	76	33	25	14	14	24	8	8	17	24	18	11
16S_OTU01902	Bacteria	unclassified	unclassified	unclassified	unclassified	unclassified	5.97423	0.118142	0.007	0.0131092	0.593525	-0.593525	0.893836	0.716864	73	5.94565e-05	10	20	2	2	5	0	1	2	1	2	0	0	1	0	0	0	1	1	5	0	4	1	2	1	0	2	1	2	2	0	1	0	3
16S_OTU00904	Bacteria	Acidobacteria	Holophagae	Subgroup_7	unclassified	unclassified	7.65222	0.127138	0.0071	0.013232	0.00541582	-0.00541582	1.3655	0.440652	156	0.000127058	0	1	2	2	1	0	4	2	1	0	9	1	3	0	0	4	1	3	8	21	10	12	11	9	7	9	5	0	0	1	12	5	4
16S_OTU01974	Bacteria	Bacteroidetes	Bacteroidia	Chitinophagales	Chitinophagaceae	unclassified	8.20078	0.146935	0.0071	0.013232	0.0952305	-0.0952305	0.77094	1.20219	74	6.0271e-05	5	5	3	5	2	1	2	3	2	5	1	3	2	0	1	1	2	4	4	5	1	3	6	3	1	0	0	0	1	2	0	0	0
16S_OTU02879	Bacteria	Acidobacteria	Acidobacteriia	Solibacterales	Solibacteraceae_(Subgroup_3)	Bryobacter	8.29955	0.173455	0.0071	0.013232	0.263782	-0.263782	1.31717	0.420174	95	7.73749e-05	0	0	0	0	0	0	0	0	0	2	3	3	3	5	2	3	1	6	4	3	5	6	1	9	1	2	0	4	5	7	1	1	3
16S_OTU03088	Bacteria	Planctomycetes	Planctomycetacia	Pirellulales	Pirellulaceae	Pirellula	8.50707	0.144844	0.0071	0.013232	-0.390706	0.390706	0.611188	1.16705	102	8.30762e-05	2	1	1	4	5	4	1	2	3	1	0	1	2	1	1	2	2	4	5	3	9	4	6	8	1	4	4	3	3	1	1	1	1
16S_OTU04874	Bacteria	Patescibacteria	Parcubacteria	Candidatus_Nomurabacteria	unclassified	unclassified	5.26866	0.126449	0.0071	0.013232	0.409572	-0.409572	0.995348	0.844318	41	3.33934e-05	0	1	0	1	0	3	0	1	1	0	0	0	3	1	3	0	1	0	0	0	0	0	0	0	0	0	0	3	0	12	1	4	1
16S_OTU06448	Bacteria	Acidobacteria	Subgroup_17	unclassified	unclassified	unclassified	6.92627	0.127509	0.0071	0.013232	0.540585	-0.540585	1.02731	0.620168	78	6.35289e-05	1	0	0	1	0	0	3	11	5	1	2	1	2	0	1	7	4	9	0	0	0	0	0	0	0	0	0	2	2	14	1	3	1
16S_OTU06989	Bacteria	Proteobacteria	Gammaproteobacteria	Betaproteobacteriales	TRA3-20	unclassified	8.06097	0.115765	0.0071	0.013232	0.228206	-0.228206	0.991928	0.98215	37	3.01355e-05	4	4	0	4	3	3	2	3	4	0	0	0	1	0	0	5	2	2	0	0	0	0	0	0	0	0	0	0	0	0	0	0	0
16S_OTU02727	Bacteria	Dependentiae	Babeliae	Babeliales	unclassified	unclassified	8.02025	0.168139	0.0072	0.0133905	-0.294333	0.294333	0.467148	1.2873	33	2.68776e-05	0	0	0	0	0	0	0	0	0	0	0	0	1	0	0	0	0	0	3	1	1	1	2	2	0	0	1	1	4	2	3	4	2
16S_OTU03047	Bacteria	unclassified	unclassified	unclassified	unclassified	unclassified	7.40218	0.0930917	0.0072	0.0133905	0.35611	-0.35611	1.12578	0.723114	18	1.46605e-05	0	0	1	0	1	1	1	1	0	0	1	0	0	0	0	0	1	1	4	2	2	0	1	0	0	0	0	1	0	0	0	0	0
16S_OTU03811	Bacteria	Chloroflexi	KD4-96	unclassified	unclassified	unclassified	8.17552	0.148621	0.0072	0.0133905	-0.0583102	0.0583102	1.11539	0.898629	2309	0.00188062	23	24	23	47	20	25	82	66	18	28	60	48	22	36	27	76	52	45	78	58	42	86	106	114	67	105	50	100	190	72	105	75	108
16S_OTU00824	Bacteria	Acidobacteria	Subgroup_17	unclassified	unclassified	unclassified	8.48066	0.159621	0.0073	0.0135577	-0.169473	0.169473	1.16613	0.798833	156	0.000127058	1	0	0	0	0	0	0	0	0	0	6	2	0	1	0	2	1	0	9	2	15	2	4	6	8	0	2	3	0	12	11	18	4
16S_OTU03503	Bacteria	Bacteroidetes	Bacteroidia	Cytophagales	Microscillaceae	unclassified	8.83918	0.161426	0.0073	0.0135577	0.193488	-0.193488	0.668244	1.23814	61	4.96828e-05	5	4	2	7	2	5	4	4	1	0	2	0	1	2	2	4	1	4	1	0	0	0	0	0	2	3	3	0	0	1	0	1	0
16S_OTU01031	Bacteria	Planctomycetes	Planctomycetacia	Pirellulales	Pirellulaceae	unclassified	7.80677	0.0994201	0.0074	0.0136773	-0.138239	0.138239	0.505223	1.32782	179	0.000145791	0	0	0	2	0	2	0	3	1	0	1	1	2	2	0	1	0	0	10	12	14	6	8	9	6	2	5	7	8	7	15	10	13
16S_OTU01118	Bacteria	Chloroflexi	Anaerolineae	unclassified	unclassified	unclassified	8.51561	0.180493	0.0074	0.0136773	-0.0355749	0.0355749	0.626851	1.28965	329	0.000267962	12	20	28	15	22	11	24	20	26	8	14	5	6	14	4	8	4	7	1	2	14	4	1	5	8	0	6	4	7	3	3	3	3
16S_OTU01691	Bacteria	Proteobacteria	Deltaproteobacteria	NB1-j	unclassified	unclassified	8.40514	0.14458	0.0074	0.0136773	0.403849	-0.403849	0.847429	0.997653	39	3.17644e-05	0	0	0	0	0	0	0	1	0	0	0	0	0	0	0	0	0	0	2	0	3	1	1	2	0	0	0	0	0	5	2	3	4
16S_OTU02171	Bacteria	Proteobacteria	Deltaproteobacteria	Myxococcales	Haliangiaceae	Haliangium	6.51253	0.142482	0.0074	0.0136773	0.192455	-0.192455	1.13587	0.830781	52	4.23526e-05	1	1	0	0	0	0	0	2	0	0	0	0	0	0	0	0	1	0	2	5	4	2	1	5	5	1	11	0	0	0	2	3	4
16S_OTU03432	Bacteria	Proteobacteria	Deltaproteobacteria	Myxococcales	BIrii41	unclassified	6.15672	0.10559	0.0074	0.0136773	0.42417	-0.42417	0.764715	1.04548	50	4.07236e-05	0	0	0	0	0	0	0	0	0	0	0	0	0	0	0	0	0	0	3	5	1	0	2	4	13	3	8	2	5	0	1	0	1
16S_OTU06087	Bacteria	Bacteroidetes	Ignavibacteria	OPB56	unclassified	unclassified	8.23047	0.158054	0.0074	0.0136773	-0.109948	0.109948	0.818125	1.16786	42	3.42079e-05	0	0	0	0	0	0	0	0	0	0	0	0	0	0	0	1	1	0	4	2	1	5	1	6	3	7	3	0	1	0	0	0	3
16S_OTU09236	Bacteria	Bacteroidetes	Ignavibacteria	OPB56	unclassified	unclassified	8.32956	0.157594	0.0074	0.0136773	0.426825	-0.426825	1.13485	0.620608	21	1.71039e-05	1	1	1	1	1	0	2	0	0	2	1	1	2	2	3	0	2	1	0	0	0	0	0	0	0	0	0	0	0	0	0	0	0
16S_OTU01082	Bacteria	Planctomycetes	Planctomycetacia	Planctomycetales	unclassified	unclassified	8.41954	0.124734	0.0075	0.0138336	-0.509976	0.509976	0.594771	1.07439	147	0.000119728	2	3	3	2	4	1	7	11	8	3	3	4	5	11	8	8	8	8	1	1	7	4	0	2	2	1	3	2	2	0	5	3	5
16S_OTU02232	Bacteria	unclassified	unclassified	unclassified	unclassified	unclassified	8.12372	0.154912	0.0075	0.0138336	0.265942	-0.265942	1.05051	0.897484	84	6.84157e-05	0	0	0	1	0	0	0	0	1	0	3	0	0	0	0	1	0	2	3	5	5	2	1	4	3	0	3	0	3	6	2	9	6
16S_OTU02855	Bacteria	Proteobacteria	Deltaproteobacteria	unclassified	unclassified	unclassified	8.22485	0.0752323	0.0075	0.0138336	-0.289045	0.289045	0.52334	1.26808	1135	0.000924427	23	21	22	35	26	31	48	54	47	20	43	36	14	17	16	25	37	27	38	46	35	6	18	20	27	22	20	67	63	50	39	50	19
16S_OTU01027	Bacteria	Patescibacteria	ABY1	Candidatus_Magasanikbacteria	unclassified	unclassified	7.35241	0.12711	0.0076	0.0139893	0.454845	-0.454845	0.839675	0.956902	88	7.16736e-05	0	0	0	6	10	20	28	17	1	0	2	1	0	0	0	1	0	0	0	0	0	0	0	0	0	0	0	2	0	0	0	0	0
16S_OTU03000	Bacteria	Patescibacteria	Saccharimonadia	Saccharimonadales	unclassified	unclassified	6.22334	0.156516	0.0076	0.0139893	0.153423	-0.153423	1.09358	0.901697	26	2.11763e-05	0	0	0	1	0	0	0	0	0	0	8	1	2	0	2	6	2	2	0	0	0	0	0	0	1	0	0	0	0	1	0	0	0
16S_OTU07648	Bacteria	Patescibacteria	Gracilibacteria	Candidatus_Peregrinibacteria	unclassified	unclassified	8.01689	0.131039	0.0076	0.0139893	0.214031	-0.214031	1.08377	0.887272	20	1.62895e-05	0	0	0	0	0	0	0	0	1	1	2	3	1	0	0	4	2	1	1	0	0	2	0	0	0	0	0	1	1	0	0	0	0
16S_OTU02596	Bacteria	Planctomycetes	OM190	unclassified	unclassified	unclassified	8.4073	0.105919	0.0077	0.014154	0.171077	-0.171077	1.27554	0.608156	63	5.13118e-05	0	0	0	0	2	3	4	2	0	0	1	0	3	0	1	7	3	6	0	0	3	0	0	0	1	4	3	5	4	3	1	2	0
16S_OTU02959	Bacteria	Proteobacteria	Gammaproteobacteria	Betaproteobacteriales	Burkholderiaceae	unclassified	7.10376	0.117577	0.0077	0.014154	0.0856259	-0.0856259	0.938815	1.07793	199	0.00016208	4	1	8	9	8	7	12	7	9	14	14	16	7	4	6	12	7	25	2	1	3	1	2	0	5	1	1	1	1	1	1	1	3
16S_OTU02613	Bacteria	Bacteroidetes	Bacteroidia	Sphingobacteriales	NS11-12_marine_group	unclassified	8.30718	0.0906212	0.0078	0.014328	-0.446208	0.446208	0.362494	1.22711	81	6.59723e-05	3	1	2	2	1	2	1	1	1	1	1	0	1	3	0	7	3	5	3	5	5	3	5	4	3	5	5	2	2	0	0	1	3
16S_OTU00950	Bacteria	Bacteroidetes	Bacteroidia	Chitinophagales	Chitinophagaceae	Terrimonas	7.91018	0.110767	0.0079	0.0144722	-0.692239	0.692239	0.451867	0.916447	92	7.49315e-05	7	7	0	5	4	4	1	1	0	0	1	1	3	13	15	8	7	8	0	0	0	0	0	0	0	0	1	0	0	3	0	0	0
16S_OTU02265	Bacteria	Proteobacteria	Deltaproteobacteria	Myxococcales	P3OB-42	unclassified	6.7117	0.15279	0.0079	0.0144722	-0.151547	0.151547	0.850873	1.13411	41	3.33934e-05	1	1	0	0	2	0	0	0	0	1	0	0	1	0	2	1	0	0	3	1	1	0	1	2	0	0	0	2	3	0	4	2	2
16S_OTU02687	Bacteria	Acidobacteria	Subgroup_22	unclassified	unclassified	unclassified	7.49346	0.0692983	0.0079	0.0144722	-0.0404341	0.0404341	1.24146	0.717034	45	3.66513e-05	0	0	0	0	0	0	0	0	0	0	0	0	0	0	0	0	0	0	3	5	0	2	1	4	0	0	0	0	1	0	8	4	8
16S_OTU03603	Bacteria	Planctomycetes	Phycisphaerae	Phycisphaerales	Phycisphaeraceae	SM1A02	7.11001	0.120764	0.0079	0.0144722	-0.603898	0.603898	0.61003	0.956241	29	2.36197e-05	0	0	0	0	0	0	0	0	0	0	0	0	2	2	0	0	0	1	1	1	3	0	0	1	1	1	1	2	2	5	0	1	0
16S_OTU01125	Bacteria	Planctomycetes	Phycisphaerae	Tepidisphaerales	WD2101_soil_group	unclassified	8.12871	0.133361	0.008	0.0146056	0.188184	-0.188184	1.23181	0.682981	307	0.000250043	6	5	5	5	5	8	13	8	6	5	10	9	4	3	4	8	7	7	18	11	19	15	10	14	15	11	14	15	12	6	2	5	5
16S_OTU01183	Bacteria	Patescibacteria	Parcubacteria	Candidatus_Yanofskybacteria	unclassified	unclassified	8.56019	0.0984375	0.008	0.0146056	-0.517234	0.517234	0.624997	1.0496	92	7.49315e-05	0	0	0	1	0	1	0	13	12	0	0	3	0	0	0	8	9	11	0	0	1	0	0	0	0	0	0	0	0	2	10	9	1
16S_OTU01308	Bacteria	Acidobacteria	Subgroup_6	unclassified	unclassified	unclassified	7.5355	0.119234	0.008	0.0146056	0.525972	-0.525972	1.0167	0.6628	105	8.55196e-05	0	0	0	0	0	0	0	0	0	0	0	0	0	0	0	0	1	0	4	2	2	4	9	6	5	3	4	2	3	6	10	7	9
16S_OTU03172	Bacteria	Patescibacteria	Saccharimonadia	Saccharimonadales	unclassified	unclassified	7.56061	0.163142	0.008	0.0146056	0.170535	-0.170535	1.08918	0.900518	17	1.3846e-05	0	0	1	0	0	2	0	0	0	0	0	0	2	1	1	1	1	4	0	0	0	0	0	0	0	0	0	1	0	0	1	1	0
16S_OTU04773	Bacteria	Patescibacteria	Parcubacteria	unclassified	unclassified	unclassified	8.22576	0.139667	0.008	0.0146056	0.0480001	-0.0480001	0.952405	1.07092	53	4.31671e-05	5	5	9	0	0	0	0	2	1	0	0	1	0	2	0	0	1	0	9	3	2	5	0	2	1	0	0	4	1	0	0	0	0
16S_OTU03845	Bacteria	Verrucomicrobia	Verrucomicrobiae	Chthoniobacterales	Chthoniobacteraceae	Chthoniobacter	7.86015	0.119065	0.0081	0.0147481	-0.317611	0.317611	0.731172	1.14481	34	2.76921e-05	3	3	3	0	1	0	1	0	1	4	1	2	4	2	2	2	2	2	0	0	0	1	0	0	0	0	0	0	0	0	0	0	0
16S_OTU04544	Bacteria	Chloroflexi	Anaerolineae	RBG-13-54-9	unclassified	unclassified	7.76051	0.115757	0.0081	0.0147481	0.112803	-0.112803	1.08424	0.92536	23	1.87329e-05	0	0	0	0	0	0	0	0	0	0	0	0	0	0	0	0	0	0	3	1	2	0	2	1	2	3	2	0	0	0	2	1	2
16S_OTU07526	Bacteria	Patescibacteria	Parcubacteria	unclassified	unclassified	unclassified	6.81292	0.138842	0.0081	0.0147481	0.00711587	-0.00711587	0.926764	1.09536	19	1.5475e-05	0	1	2	0	0	0	0	0	2	0	1	1	1	1	1	1	0	3	0	0	0	0	0	0	0	0	0	1	1	3	0	0	0
16S_OTU08987	Bacteria	Chloroflexi	TK10	unclassified	unclassified	unclassified	7.34113	0.16037	0.0081	0.0147481	0.451731	-0.451731	1.23134	0.332428	15	1.22171e-05	0	2	2	3	1	1	1	1	1	0	1	0	1	0	1	0	0	0	0	0	0	0	0	0	0	0	0	0	0	0	0	0	0
16S_OTU00879	Bacteria	Actinobacteria	MB-A2-108	unclassified	unclassified	unclassified	7.68087	0.180501	0.0082	0.0148798	0.215133	-0.215133	0.923636	1.05248	281	0.000228867	0	0	0	0	0	0	0	3	0	0	7	5	0	0	0	3	8	3	11	12	15	11	13	19	6	6	8	6	17	14	17	8	33
16S_OTU01241	Bacteria	Proteobacteria	Gammaproteobacteria	Betaproteobacteriales	Nitrosomonadaceae	unclassified	7.78497	0.149727	0.0082	0.0148798	0.502518	-0.502518	1.15439	0.437548	342	0.00027855	5	10	2	9	8	10	3	9	5	8	20	41	7	28	11	30	29	22	5	3	27	0	1	1	7	3	8	3	0	6	3	5	2
16S_OTU03414	Bacteria	Planctomycetes	Phycisphaerae	Tepidisphaerales	WD2101_soil_group	unclassified	7.98004	0.122108	0.0082	0.0148798	0.678462	-0.678462	0.846616	0.606045	704	0.000573389	39	31	18	54	57	42	37	39	40	7	26	26	30	28	25	37	22	24	3	19	10	16	9	9	2	3	4	12	4	4	4	4	6
16S_OTU05177	Bacteria	Planctomycetes	Planctomycetacia	Gemmatales	Gemmataceae	unclassified	8.36611	0.09225	0.0082	0.0148798	0.136288	-0.136288	0.945693	1.06073	18	1.46605e-05	0	0	0	0	0	0	0	0	0	0	0	0	0	0	0	0	0	0	1	0	0	0	0	1	0	1	2	0	0	0	1	1	3
16S_OTU07456	Bacteria	Patescibacteria	Gracilibacteria	Candidatus_Peribacteria	unclassified	unclassified	8.92948	0.117134	0.0082	0.0148798	-0.0715715	0.0715715	0.830379	1.16552	32	2.60631e-05	0	2	1	0	2	1	0	1	1	0	1	1	0	1	0	2	2	1	0	0	0	0	0	0	2	1	1	2	1	1	0	1	0
16S_OTU02181	Bacteria	Gemmatimonadetes	Gemmatimonadetes	Gemmatimonadales	Gemmatimonadaceae	unclassified	6.72513	0.134701	0.0083	0.0150309	0.024438	-0.024438	0.678053	1.26404	51	4.15381e-05	0	0	0	0	0	0	0	0	0	0	1	0	0	0	0	0	0	0	2	1	2	1	3	2	0	0	0	0	1	3	13	6	2
16S_OTU03288	Bacteria	Verrucomicrobia	Verrucomicrobiae	Pedosphaerales	Pedosphaeraceae	unclassified	8.72609	0.146558	0.0083	0.0150309	0.522258	-0.522258	1.05589	0.60525	39	3.17644e-05	5	5	5	4	1	2	4	1	3	3	0	0	0	2	3	0	0	0	0	0	0	0	0	0	0	0	0	0	0	1	0	0	0
16S_OTU05632	Bacteria	Proteobacteria	Alphaproteobacteria	Rhizobiales	unclassified	unclassified	8.09708	0.200469	0.0083	0.0150309	-0.128789	0.128789	0.976095	1.03486	28	2.28052e-05	1	0	1	0	1	1	1	0	1	4	0	2	1	1	0	4	0	4	0	0	0	0	0	0	0	0	0	2	0	2	0	0	1
16S_OTU01474	Bacteria	unclassified	unclassified	unclassified	unclassified	unclassified	4.61232	0.071569	0.0084	0.0151813	0.0196111	-0.0196111	1.10343	0.916763	57	4.6425e-05	0	0	0	0	0	0	0	0	0	0	3	0	0	0	0	0	1	0	9	6	22	0	3	3	4	0	0	0	1	2	0	0	1
16S_OTU02249	Bacteria	Chloroflexi	Chloroflexia	Thermomicrobiales	JG30-KF-CM45	unclassified	8.58857	0.132713	0.0084	0.0151813	0.499633	-0.499633	1.07601	0.610244	137	0.000111583	13	16	12	3	1	5	5	8	11	8	1	3	2	7	3	3	0	1	1	0	2	3	1	4	3	6	2	4	8	0	0	0	0
16S_OTU04548	Bacteria	Bacteroidetes	Bacteroidia	Sphingobacteriales	env.OPS_17	unclassified	7.6533	0.204859	0.0084	0.0151813	0.299513	-0.299513	1.14003	0.754447	27	2.19908e-05	2	1	1	1	1	0	0	1	1	0	0	0	1	0	1	0	0	2	2	1	1	3	0	1	1	3	1	0	0	0	0	1	0
16S_OTU05889	Bacteria	Planctomycetes	Phycisphaerae	Tepidisphaerales	WD2101_soil_group	unclassified	7.5429	0.153663	0.0085	0.0153517	0.151964	-0.151964	1.20923	0.740062	38	3.095e-05	3	6	1	0	0	0	0	0	0	0	0	0	0	0	1	0	0	0	2	9	1	5	4	1	1	0	0	0	3	1	0	0	0
16S_OTU01016	Bacteria	Acidobacteria	Subgroup_6	unclassified	unclassified	unclassified	7.14166	0.110846	0.0086	0.0154907	-0.473843	0.473843	0.594112	1.10923	119	9.69223e-05	9	1	0	10	0	7	13	22	15	1	6	2	1	4	1	2	4	4	0	0	6	0	0	0	2	2	1	0	0	0	0	4	0
16S_OTU02143	Bacteria	Planctomycetes	BD7-11	unclassified	unclassified	unclassified	8.34434	0.181933	0.0086	0.0154907	0.0055203	-0.0055203	0.776034	1.20687	55	4.4796e-05	0	0	0	3	0	0	3	2	2	2	0	2	6	0	5	2	1	0	3	1	0	1	0	0	0	0	1	3	4	3	1	1	1
16S_OTU04522	Bacteria	Planctomycetes	Planctomycetacia	Gemmatales	Gemmataceae	Gemmata	7.9216	0.127877	0.0086	0.0154907	-0.64219	0.64219	0.416061	1.00617	58	4.72394e-05	2	1	3	4	5	7	7	5	7	0	4	1	0	1	1	2	1	6	1	0	0	0	0	0	0	0	0	0	0	0	0	0	0
16S_OTU07716	Bacteria	Proteobacteria	Gammaproteobacteria	Betaproteobacteriales	Nitrosomonadaceae	MND1	7.53249	0.18124	0.0086	0.0154907	0.172357	-0.172357	1.11577	0.866583	34	2.76921e-05	0	2	0	1	2	0	0	0	2	0	3	3	6	2	1	4	1	5	0	0	0	0	0	0	0	1	0	0	0	1	0	0	0
16S_OTU02403	Bacteria	Verrucomicrobia	Verrucomicrobiae	Chthoniobacterales	Chthoniobacteraceae	Chthoniobacter	7.39183	0.129436	0.0087	0.0156499	0.232252	-0.232252	1.33367	0.407343	136	0.000110768	3	1	6	8	10	7	6	4	10	3	3	7	1	3	3	2	3	5	6	2	0	11	7	4	1	2	2	3	4	1	0	4	1
16S_OTU02410	Bacteria	Proteobacteria	Gammaproteobacteria	Pseudomonadales	Pseudomonadaceae	Pseudomonas	7.44758	0.0436185	0.0087	0.0156499	-0.341212	0.341212	0.837103	1.05429	68	5.53842e-05	0	0	0	0	0	0	0	1	0	0	0	0	0	0	0	0	0	0	3	9	5	0	0	2	2	2	2	0	0	1	6	3	2
16S_OTU01100	Bacteria	Planctomycetes	Planctomycetacia	Gemmatales	Gemmataceae	Gemmata	7.96983	0.1735	0.0088	0.0157665	-0.49271	0.49271	0.482953	1.1452	166	0.000135202	9	6	3	7	6	11	6	6	4	5	2	10	5	1	5	5	3	8	12	5	6	0	4	7	7	5	4	2	5	3	1	1	2
16S_OTU01112	Bacteria	Latescibacteria	unclassified	unclassified	unclassified	unclassified	7.53991	0.151938	0.0088	0.0157665	-0.0459782	0.0459782	1.00558	1.02135	76	6.18999e-05	0	0	0	2	0	2	0	0	0	0	2	2	2	1	0	0	0	3	5	5	8	2	11	3	9	3	7	5	1	2	0	0	0
16S_OTU02311	Bacteria	Actinobacteria	Acidimicrobiia	Microtrichales	Microtrichaceae	IMCC26207	7.76252	0.184097	0.0088	0.0157665	0.247181	-0.247181	0.633745	1.23604	43	3.50223e-05	0	0	2	0	0	1	0	1	1	2	2	2	1	1	3	0	0	0	1	1	1	0	2	0	0	2	1	4	3	0	3	1	5
16S_OTU02995	Bacteria	Verrucomicrobia	Verrucomicrobiae	Pedosphaerales	Pedosphaeraceae	unclassified	7.10755	0.063714	0.0088	0.0157665	-0.124411	0.124411	0.70316	1.23758	41	3.33934e-05	10	10	5	1	0	0	3	1	2	5	1	2	0	1	0	0	0	0	0	0	0	0	0	0	0	0	0	0	0	0	0	0	0
16S_OTU03829	Bacteria	Planctomycetes	Planctomycetacia	Pirellulales	Pirellulaceae	unclassified	8.11773	0.139009	0.0088	0.0157665	-0.297485	0.297485	0.795291	1.11307	91	7.4117e-05	0	1	0	0	0	0	5	0	0	0	4	0	0	0	0	0	3	0	2	0	5	0	2	2	3	4	7	1	1	5	11	6	8
16S_OTU05143	Bacteria	Patescibacteria	unclassified	unclassified	unclassified	unclassified	8.15066	0.133351	0.0088	0.0157665	0.288903	-0.288903	1.14362	0.757762	25	2.03618e-05	5	5	3	1	0	2	0	3	0	1	3	0	0	0	0	0	0	0	1	0	0	1	0	0	0	0	0	0	0	0	0	0	0
16S_OTU00178	Bacteria	Verrucomicrobia	Verrucomicrobiae	Chthoniobacterales	Chthoniobacteraceae	Candidatus_Udaeobacter	7.39143	0.0386525	0.0089	0.0158927	-0.473953	0.473953	0.553819	1.12979	526	0.000428413	35	53	37	39	23	29	4	12	11	8	3	19	58	36	61	36	24	38	0	0	0	0	0	0	0	0	0	0	0	0	0	0	0
16S_OTU02362	Bacteria	Cyanobacteria	Oxyphotobacteria	Chloroplast	unclassified	unclassified	8.83212	0.146956	0.0089	0.0158927	-0.555461	0.555461	0.707537	0.951232	48	3.90947e-05	1	0	3	4	4	4	4	2	4	1	1	2	2	0	2	1	1	0	3	3	0	1	0	0	0	1	0	0	0	0	0	0	1
16S_OTU03362	Bacteria	Proteobacteria	Deltaproteobacteria	Myxococcales	Polyangiaceae	Sorangium	8.75399	0.141699	0.0089	0.0158927	0.176099	-0.176099	1.0342	0.96103	36	2.9321e-05	0	0	0	0	0	1	3	5	5	0	2	1	1	0	0	0	1	0	2	0	3	0	1	2	3	0	3	0	0	1	0	0	2
16S_OTU03480	Bacteria	Planctomycetes	vadinHA49	unclassified	unclassified	unclassified	7.81043	0.193937	0.0089	0.0158927	-0.156314	0.156314	1.04654	0.954899	38	3.095e-05	3	2	0	5	1	4	1	3	5	0	0	1	0	2	2	2	0	2	1	0	1	0	0	1	0	1	1	0	0	0	0	0	0
16S_OTU03835	Bacteria	Proteobacteria	Gammaproteobacteria	Betaproteobacteriales	SC-I-84	unclassified	7.78086	0.0414267	0.0089	0.0158927	0.227734	-0.227734	1.31367	0.472504	113	9.20354e-05	0	0	0	0	0	0	0	0	1	0	0	0	0	0	0	0	0	0	3	4	0	1	0	2	10	16	7	0	0	0	13	11	17
16S_OTU00283	Bacteria	Planctomycetes	Planctomycetacia	Planctomycetales	unclassified	unclassified	7.72267	0.11214	0.009	0.0160499	0.205958	-0.205958	1.27023	0.596257	1106	0.000900807	40	45	75	20	37	20	47	52	54	35	34	37	60	44	38	53	26	53	15	9	15	19	15	17	20	18	19	34	42	24	13	15	24
16S_OTU03249	Bacteria	Bacteroidetes	Bacteroidia	Sphingobacteriales	NS11-12_marine_group	unclassified	7.84045	0.153301	0.009	0.0160499	0.512721	-0.512721	1.15109	0.42087	17	1.3846e-05	0	1	0	0	0	0	0	0	0	0	0	0	0	0	1	0	0	0	1	1	1	0	2	1	2	2	2	0	2	0	0	1	0
16S_OTU00188	Bacteria	Verrucomicrobia	Verrucomicrobiae	Pedosphaerales	Pedosphaeraceae	unclassified	7.76123	0.147982	0.0091	0.016196	0.333444	-0.333444	1.10806	0.77174	1616	0.00131619	43	43	22	44	40	23	53	47	75	30	36	41	29	35	23	6	18	13	73	54	96	25	55	52	95	60	80	53	26	22	46	47	60
16S_OTU00874	Bacteria	Actinobacteria	Thermoleophilia	Gaiellales	unclassified	unclassified	7.53928	0.204103	0.0091	0.016196	0.0462717	-0.0462717	1.13842	0.870796	304	0.0002476	1	0	0	0	0	0	0	0	0	0	11	0	0	1	0	1	0	1	18	24	4	12	15	6	7	18	16	22	18	20	19	15	24
16S_OTU04063	Bacteria	Patescibacteria	Parcubacteria	Candidatus_Adlerbacteria	unclassified	unclassified	6.94513	0.173412	0.0091	0.016196	-0.173571	0.173571	0.820243	1.14988	29	2.36197e-05	0	0	0	0	0	0	0	0	0	0	0	0	0	0	0	0	0	0	0	0	2	0	1	0	0	0	2	2	2	6	4	3	0
16S_OTU00190	Bacteria	Chloroflexi	Anaerolineae	Ardenticatenales	unclassified	unclassified	7.65241	0.0879281	0.0092	0.0162985	0.163409	-0.163409	0.615223	1.27428	1051	0.000856011	0	0	0	0	0	0	0	0	3	0	5	1	0	0	0	0	2	0	67	104	55	25	44	38	7	6	76	18	18	42	106	93	92
16S_OTU01867	Bacteria	Proteobacteria	Alphaproteobacteria	unclassified	unclassified	unclassified	8.09755	0.108272	0.0092	0.0162985	0.227348	-0.227348	0.930684	1.04077	135	0.000109954	5	3	4	2	7	3	8	7	10	1	2	4	4	3	2	4	5	5	2	1	0	1	0	0	1	1	5	3	8	6	3	8	5
16S_OTU02180	Bacteria	Planctomycetes	Planctomycetacia	Planctomycetales	unclassified	unclassified	7.48982	0.133685	0.0092	0.0162985	0.241651	-0.241651	1.18671	0.725873	460	0.000374658	8	3	1	5	10	7	10	14	19	1	18	10	7	11	5	15	9	18	28	19	17	14	13	20	6	10	4	18	14	17	18	19	28
16S_OTU03338	Bacteria	Chloroflexi	Ktedonobacteria	C0119	unclassified	unclassified	7.49272	0.150998	0.0092	0.0162985	0.60796	-0.60796	0.986545	0.550308	135	0.000109954	8	13	23	10	1	8	7	5	7	5	3	4	12	2	4	4	3	1	0	1	1	6	3	3	0	0	0	1	0	0	0	0	0
16S_OTU04222	Bacteria	Patescibacteria	Parcubacteria	unclassified	unclassified	unclassified	7.74936	0.129792	0.0092	0.0162985	0.0578295	-0.0578295	0.945617	1.07589	38	3.095e-05	0	0	0	0	0	0	1	2	2	0	0	0	0	2	0	3	3	3	1	1	1	0	0	0	0	1	3	0	2	2	5	1	2
16S_OTU06414	Bacteria	Actinobacteria	Actinobacteria	Corynebacteriales	Mycobacteriaceae	Mycobacterium	8.24079	0.159702	0.0092	0.0162985	-0.212539	0.212539	0.827048	1.131	205	0.000166967	2	3	4	10	4	6	8	3	6	9	15	7	10	5	5	11	10	8	11	3	2	7	4	3	3	2	5	6	9	6	2	1	6
16S_OTU09014	Bacteria	Planctomycetes	Planctomycetacia	Pirellulales	Pirellulaceae	unclassified	7.80722	0.188393	0.0092	0.0162985	-0.216396	0.216396	0.641206	1.24439	17	1.3846e-05	0	0	0	0	0	0	0	0	1	0	0	0	0	1	1	1	2	0	0	0	0	0	0	0	0	2	0	1	1	2	0	3	1
16S_OTU02178	Bacteria	Chloroflexi	Anaerolineae	SBR1031	A4b	unclassified	6.85441	0.045036	0.0093	0.0164324	0.334694	-0.334694	1.28853	0.401615	47	3.82802e-05	2	3	2	6	5	5	2	2	2	0	2	2	3	2	2	3	2	2	0	0	0	0	0	0	0	0	0	0	0	0	0	0	0
16S_OTU02561	Bacteria	Cyanobacteria	Oxyphotobacteria	Nostocales	Nostocaceae	Nostoc_PCC-73102	6.69977	0.169609	0.0093	0.0164324	0.513376	-0.513376	1.05124	0.628969	72	5.8642e-05	0	0	0	2	0	0	3	1	2	2	2	1	2	0	1	0	1	1	0	3	1	0	2	1	1	2	1	1	2	12	5	6	9
16S_OTU04178	Bacteria	unclassified	unclassified	unclassified	unclassified	unclassified	8.31401	0.114947	0.0093	0.0164324	0.365803	-0.365803	1.30341	0.27671	80	6.51578e-05	1	0	5	5	6	4	1	3	7	4	4	2	0	1	0	4	0	3	2	2	2	0	0	0	5	8	5	0	0	0	0	2	0
16S_OTU05561	Bacteria	unclassified	unclassified	unclassified	unclassified	unclassified	8.12667	0.107263	0.0093	0.0164324	0.0327883	-0.0327883	0.653949	1.27628	14	1.14026e-05	1	0	0	2	2	2	0	1	1	0	0	1	0	0	0	0	0	0	1	1	0	0	0	0	0	0	0	0	0	0	1	0	0
16S_OTU00196	Bacteria	Acidobacteria	Subgroup_6	unclassified	unclassified	unclassified	7.61851	0.125433	0.0094	0.0165873	-0.499935	0.499935	0.733017	0.99611	1692	0.00137809	8	0	0	9	11	11	23	11	14	3	15	8	3	1	4	13	15	15	55	68	75	46	42	68	96	123	101	62	114	115	77	124	109
16S_OTU00842	Bacteria	Planctomycetes	Planctomycetacia	Pirellulales	Pirellulaceae	unclassified	7.56241	0.151254	0.0094	0.0165873	0.244386	-0.244386	1.13998	0.795486	287	0.000233754	17	9	4	11	6	6	16	8	12	1	6	3	5	1	6	3	4	5	6	13	7	6	6	8	15	16	11	8	10	5	8	9	10
16S_OTU03598	Bacteria	Firmicutes	Bacilli	Bacillales	Bacillaceae	Bacillus	7.64423	0.189462	0.0095	0.0167308	0.00321046	-0.00321046	1.12426	0.891534	59	4.80539e-05	5	2	6	7	2	0	2	6	5	1	1	3	1	3	1	0	1	0	0	2	0	2	1	3	0	0	1	0	1	0	1	0	0
16S_OTU04482	Bacteria	Planctomycetes	Planctomycetacia	Isosphaerales	Isosphaeraceae	Singulisphaera	8.02924	0.177108	0.0095	0.0167308	0.22097	-0.22097	1.08408	0.883287	78	6.35289e-05	3	9	5	3	6	6	9	3	8	1	1	1	1	0	4	2	0	4	0	2	0	1	2	0	0	0	0	0	0	3	1	0	1
16S_OTU08000	Bacteria	Proteobacteria	Deltaproteobacteria	Myxococcales	bacteriap25	unclassified	8.36517	0.175173	0.0095	0.0167308	0.306381	-0.306381	1.14864	0.735306	14	1.14026e-05	0	0	2	1	1	0	0	0	0	0	0	0	1	1	1	1	1	1	0	0	0	0	0	0	0	0	0	1	0	0	1	0	1
16S_OTU00711	Bacteria	Actinobacteria	Rubrobacteria	Rubrobacterales	Rubrobacteriaceae	Rubrobacter	7.64267	0.181113	0.0096	0.0168738	-0.393123	0.393123	0.394893	1.25523	173	0.000140904	1	5	0	3	0	0	0	2	2	0	4	2	0	2	0	4	3	1	4	11	9	5	7	9	6	4	5	8	12	8	6	15	13
16S_OTU04704	Bacteria	Actinobacteria	Actinobacteria	unclassified	unclassified	unclassified	7.50502	0.180579	0.0096	0.0168738	-0.115413	0.115413	1.03519	0.97929	12	9.77367e-06	1	1	0	1	2	1	2	1	0	0	0	0	0	0	1	0	0	1	0	1	0	0	0	0	0	0	0	0	0	0	0	0	0
16S_OTU05158	Bacteria	Planctomycetes	Planctomycetacia	Gemmatales	Gemmataceae	unclassified	7.99491	0.188763	0.0096	0.0168738	0.398819	-0.398819	1.0956	0.722266	16	1.30316e-05	0	0	0	0	0	0	1	1	0	0	2	0	3	1	1	0	1	2	0	0	1	0	0	0	0	0	0	0	0	1	0	0	0
16S_OTU00222	Bacteria	Proteobacteria	Gammaproteobacteria	Betaproteobacteriales	B1-7BS	unclassified	7.4112	0.155096	0.0097	0.0169829	-0.108199	0.108199	0.855176	1.14136	521	0.00042434	0	0	0	0	0	0	0	0	0	0	15	3	0	0	0	0	0	0	18	29	37	12	20	31	10	22	8	14	6	39	70	52	18
16S_OTU01906	Bacteria	Planctomycetes	Phycisphaerae	Tepidisphaerales	WD2101_soil_group	unclassified	7.63142	0.131695	0.0097	0.0169829	-0.0386914	0.0386914	1.07966	0.943387	197	0.000160451	1	4	0	7	8	5	3	3	4	2	9	4	7	4	7	5	4	3	5	4	3	2	4	6	9	11	7	6	4	5	12	5	6
16S_OTU02880	Bacteria	Planctomycetes	Planctomycetacia	unclassified	unclassified	unclassified	7.30504	0.160587	0.0097	0.0169829	-0.444796	0.444796	0.558985	1.15213	59	4.80539e-05	2	2	4	0	1	1	1	2	2	3	3	8	3	2	1	4	1	4	0	0	0	0	0	1	1	2	2	0	0	4	0	0	1
16S_OTU02998	Bacteria	Planctomycetes	Planctomycetacia	Gemmatales	Gemmataceae	unclassified	7.54994	0.14282	0.0097	0.0169829	-0.219174	0.219174	0.731201	1.19266	93	7.5746e-05	4	6	9	4	8	6	9	7	4	2	1	1	5	2	4	1	3	3	2	0	0	1	0	0	1	0	2	2	5	0	0	0	1
16S_OTU04275	Bacteria	unclassified	unclassified	unclassified	unclassified	unclassified	3.75175	0.0767315	0.0097	0.0169829	-0.161774	0.161774	0.66474	1.24961	36	2.9321e-05	0	0	1	4	3	13	4	3	2	2	1	0	0	0	2	0	0	1	0	0	0	0	0	0	0	0	0	0	0	0	0	0	0
16S_OTU05244	Bacteria	Patescibacteria	Parcubacteria	Candidatus_Kaiserbacteria	unclassified	unclassified	8.01793	0.211892	0.0097	0.0169829	0.279683	-0.279683	1.35171	0.257019	11	8.9592e-06	1	0	1	2	0	1	0	0	1	0	0	0	0	0	0	0	0	0	1	0	0	1	0	0	1	0	1	0	0	1	0	0	0
16S_OTU01045	Bacteria	Proteobacteria	Gammaproteobacteria	R7C24	unclassified	unclassified	6.60954	0.0730115	0.0098	0.0171023	0.470159	-0.470159	1.14243	0.534388	358	0.000291581	12	8	15	12	4	4	16	10	12	6	12	11	13	11	11	15	14	14	10	18	8	8	5	2	7	5	8	14	32	15	9	6	2
16S_OTU01134	Bacteria	Chloroflexi	Anaerolineae	SBR1031	unclassified	unclassified	7.01945	0.149646	0.0098	0.0171023	-0.127592	0.127592	0.972831	1.03824	142	0.000115655	1	10	3	6	5	8	1	2	8	21	2	15	21	11	9	4	8	6	0	0	0	0	0	0	0	0	1	0	0	0	0	0	0
16S_OTU02584	Bacteria	Planctomycetes	Phycisphaerae	CCM11a	unclassified	unclassified	6.47176	0.128462	0.0098	0.0171023	-0.545364	0.545364	0.530505	1.07124	67	5.45697e-05	3	1	0	0	1	2	1	5	5	0	2	0	3	4	1	2	6	3	0	0	1	0	0	0	0	0	0	0	0	2	3	3	0
16S_OTU05103	Bacteria	unclassified	unclassified	unclassified	unclassified	unclassified	6.90184	0.154737	0.0098	0.0171023	0.259632	-0.259632	1.04868	0.903515	16	1.30316e-05	0	0	0	1	0	0	0	0	1	0	0	0	0	0	0	0	0	0	0	0	1	0	0	0	0	0	0	1	1	1	4	0	1
16S_OTU07651	Bacteria	Patescibacteria	Parcubacteria	Candidatus_Kaiserbacteria	unclassified	unclassified	7.09202	0.150207	0.0098	0.0171023	0.428646	-0.428646	1.05692	0.743402	25	2.03618e-05	2	3	0	0	4	1	3	2	6	0	0	0	0	1	0	2	1	0	0	0	0	0	0	0	0	0	0	0	0	0	0	0	0
16S_OTU00814	Bacteria	Planctomycetes	OM190	unclassified	unclassified	unclassified	7.89145	0.180424	0.0099	0.0172433	0.47139	-0.47139	1.10599	0.604202	322	0.00026226	0	6	6	17	5	2	12	3	5	4	13	14	5	9	2	20	9	10	9	5	11	2	7	5	11	9	18	5	20	5	13	10	11
16S_OTU06280	Bacteria	Patescibacteria	Parcubacteria	unclassified	unclassified	unclassified	7.13488	0.137281	0.0099	0.0172433	0.188312	-0.188312	1.25589	0.637546	40	3.25789e-05	1	0	2	0	0	1	0	1	0	0	0	0	0	0	2	3	2	0	0	1	0	2	1	1	1	2	0	2	4	5	1	2	1
16S_OTU08026	Bacteria	Proteobacteria	Gammaproteobacteria	Diplorickettsiales	Diplorickettsiaceae	Aquicella	5.88704	0.138692	0.0099	0.0172433	0.167116	-0.167116	1.13243	0.846928	22	1.79184e-05	2	3	4	0	0	1	1	0	2	0	0	0	0	1	0	0	0	0	0	0	1	0	0	6	0	0	0	0	1	0	0	0	0
16S_OTU01012	Bacteria	Proteobacteria	Alphaproteobacteria	Rhizobiales	Beijerinckiaceae	Bosea	8.35702	0.179127	0.0101	0.0175462	-0.517997	0.517997	0.447978	1.13575	284	0.00023131	5	1	5	10	1	2	11	9	5	10	12	8	8	7	11	6	5	13	12	4	8	12	5	7	4	14	5	6	7	2	15	11	16
16S_OTU02419	Bacteria	Verrucomicrobia	Verrucomicrobiae	Pedosphaerales	Pedosphaeraceae	unclassified	6.8156	0.159209	0.0101	0.0175462	-0.488744	0.488744	0.682707	1.04254	21	1.71039e-05	2	0	0	0	0	0	0	1	1	1	1	1	4	1	2	3	0	1	0	0	0	0	0	0	0	0	1	1	0	0	1	0	0
16S_OTU03327	Bacteria	Chloroflexi	Anaerolineae	SBR1031	unclassified	unclassified	7.80396	0.174569	0.0101	0.0175462	0.204466	-0.204466	0.921613	1.05874	22	1.79184e-05	0	0	0	0	0	0	0	2	0	0	0	0	0	0	0	1	0	0	1	0	0	1	0	0	0	0	1	1	1	3	2	3	2
16S_OTU04553	Bacteria	Proteobacteria	Deltaproteobacteria	Myxococcales	Haliangiaceae	Haliangium	7.52323	0.142387	0.0101	0.0175462	0.478741	-0.478741	0.983825	0.778178	463	0.000377101	5	9	8	3	6	9	5	8	12	4	9	7	8	4	8	12	5	19	14	33	16	8	11	16	11	17	15	16	24	21	27	29	26
16S_OTU00732	Bacteria	Planctomycetes	Phycisphaerae	Tepidisphaerales	WD2101_soil_group	unclassified	7.84385	0.137951	0.0102	0.017697	0.11185	-0.11185	1.08692	0.922464	170	0.00013846	4	4	6	6	16	10	4	9	6	4	4	14	15	19	7	14	13	14	0	0	0	0	0	0	0	0	0	1	0	0	0	0	0
[truncated: 5,042 more rows]
[truncated: 3 more columns]
